# Supplementary material
Source: publisher figshare collection journal article supplement (https://acs.figshare.com/ndownloader/files/18028448)
Supplement: Supplementary file 1 [file 18028448]

## Sheet: Reactor 1 Compartment 1
Time	Influent flowrate (m3/h)	DO (g O2/m3)	NH4 (g N/m3)	NO3 (g N/m3)	N2O (g N/m3)	Temperature (°C)	N2O emission rate (g N/m3/d)
6/14/2018 7:30:00 AM.000	1081.5	0.04	0	4.27	1.91022	18.295	3.66861
6/14/2018 7:35:00 AM.000	962.6	0.03	0	4	1.57591	18.2925	3.02631
6/14/2018 7:40:00 AM.000	645.8	0.03	0	3.51	1.02927	18.29	1.9763
6/14/2018 7:45:00 AM.000	397.4	0.03	0	3.23	0.14374	18.2875	0.275614
6/14/2018 7:50:00 AM.000	390	0.03	0	2.93	0.10619	18.2875	0.203503
6/14/2018 7:55:00 AM.000	404.8	0.03	0	2.51	0.10433	18.2875	0.199931
6/14/2018 8:00:00 AM.000	287.2	0.06	0	2.13	0.09829	18.285	0.188321
6/14/2018 8:05:00 AM.000	284.9	0.6	0	1.79	0.09519	18.2875	0.582375
6/14/2018 8:10:00 AM.000	223.6	1.05	0	1.64	0.10203	18.2925	1.11728
6/14/2018 8:15:00 AM.000	333	1.18	0	1.75	0.11628	18.29	1.40279
6/14/2018 8:20:00 AM.000	340.2	1.37	0	1.79	0.1511	18.29	1.87475
6/14/2018 8:25:00 AM.000	258.6	1.38	0	1.76	0.20603	18.2925	2.74908
6/14/2018 8:30:00 AM.000	246.2	1.49	0	1.93	0.25445	18.2975	3.43057
6/14/2018 8:35:00 AM.000	241.6	1.5	0	2.1	0.30802	18.2975	4.04807
6/14/2018 8:40:00 AM.000	254.7	1.31	0	2.15	0.38166	18.3025	4.51235
6/14/2018 8:45:00 AM.000	299.3	1.1	0	2.29	0.49858	18.305	5.05499
6/14/2018 8:50:00 AM.000	323.5	0.84	0	2.5	0.64639	18.3075	5.65405
6/14/2018 8:55:00 AM.000	330.1	0.67	0	2.57	0.76788	18.3075	5.40275
6/14/2018 9:00:00 AM.000	360.8	0.93	0	2.53	0.90835	18.315	8.97781
6/14/2018 9:05:00 AM.000	378.5	1.14	0	2.64	1.03835	18.32	13.0111
6/14/2018 9:10:00 AM.000	404.9	1.56	0	2.77	1.00948	18.32	12.9362
6/14/2018 9:15:00 AM.000	470.4	2.15	0	2.86	0.99485	18.3275	14.1151
6/14/2018 9:20:00 AM.000	357.9	1.53	0	3.14	1.14179	18.3325	12.1318
6/14/2018 9:25:00 AM.000	353.1	0.86	0	3.3	1.15619	18.34	7.44577
6/14/2018 9:30:00 AM.000	395.9	1.26	0	3.31	1.04861	18.3425	7.61057
6/14/2018 9:35:00 AM.000	330.4	1.51	0	3.51	1.20824	18.3475	9.76195
6/14/2018 9:40:00 AM.000	426.2	0.9	0	3.75	1.32593	18.355	7.73787
6/14/2018 9:45:00 AM.000	422.2	0.99	0	3.79	1.14051	18.355	4.9401
6/14/2018 9:50:00 AM.000	386.9	1.36	0	3.93	1.18946	18.3625	7.03601
6/14/2018 9:55:00 AM.000	395.1	1.5	0	4.2	1.36786	18.365	9.8619
6/14/2018 10:00:00 AM.000	395.3	1.76	0	4.28	1.22124	18.37	8.82069
6/14/2018 10:05:00 AM.000	421.1	1.74	0	4.31	1.16052	18.3775	5.48247
6/14/2018 10:10:00 AM.000	439.2	1.57	0	4.53	1.31001	18.38	6.12361
6/14/2018 10:15:00 AM.000	448.9	1.6	0	4.76	1.24192	18.385	6.22196
6/14/2018 10:20:00 AM.000	480.9	1.67	0	4.84	1.14496	18.3925	4.78774
6/14/2018 10:25:00 AM.000	286.9	1.48	0	5.02	0.95119	18.395	3.77837
6/14/2018 10:30:00 AM.000	118.1	1.42	0	5.11	0.24256	18.4	1.03023
6/14/2018 10:35:00 AM.000	56.4	1.7	0	5.17	0.27162	18.4075	1.51301
6/14/2018 10:40:00 AM.000	7.8	1.82	0	5.28	0.23403	18.415	1.09057
6/14/2018 10:45:00 AM.000	5.3	1.82	0	5.34	0.34571	18.4225	1.24065
6/14/2018 10:50:00 AM.000	-2.7	1.8	0	5.38	1.34495	18.43	5.27677
6/14/2018 10:55:00 AM.000	-2.7	1.97	0	5.37	0.22975	18.4325	1.16853
6/14/2018 11:00:00 AM.000	-2.6	2.09	0	5.41	0.22766	18.435	1.46261
6/14/2018 11:05:00 AM.000	-2.8	2.02	0	5.45	0.21469	18.4375	1.10618
6/14/2018 11:10:00 AM.000	-2.6	2.31	0	5.47	0.21127	18.4375	0.878346
6/14/2018 11:15:00 AM.000	-2.8	2.09	0	5.51	0.21396	18.4425	0.61051
6/14/2018 11:20:00 AM.000	-2.6	1.47	0	5.53	0.21017	18.4475	0.573042
6/14/2018 11:25:00 AM.000	-2.7	1.81	0	5.55	0.20538	18.4575	0.592635
6/14/2018 11:30:00 AM.000	-2.7	1.81	0	5.56	0.20876	18.4675	0.576485
6/14/2018 11:35:00 AM.000	-2.6	1.39	0	5.58	0.21135	18.475	0.741209
6/14/2018 11:40:00 AM.000	-2.8	1.87	0	5.68	0.20348	18.4825	0.829574
6/14/2018 11:45:00 AM.000	-2.5	1.33	0	5.61	0.20832	18.4925	0.432246
6/14/2018 11:50:00 AM.000	-2.8	0.55	0	5.5	0.21031	18.5025	0.40552
6/14/2018 11:55:00 AM.000	???	0.1	0	5.5	0.21031	18.5125	0.405616
6/14/2018 12:00:00 PM.000	-2.4	0.1	0	5.55	0.17963	18.5225	0.346466
6/14/2018 12:05:00 PM.000	577.5	0.04	0	5.53	0.14511	18.53	0.279853
6/14/2018 12:10:00 PM.000	1004.7	0.03	0	5.39	0.14409	18.5375	0.277932
6/14/2018 12:15:00 PM.000	685.1	0.03	0	5.28	0.10708	18.5375	0.206436
6/14/2018 12:20:00 PM.000	634.1	0.03	0	5.21	0.06298	18.545	0.121264
6/14/2018 12:25:00 PM.000	634.2	0.03	0	5.07	0.06145	18.5525	0.118329
6/14/2018 12:30:00 PM.000	625.5	0.03	0	4.96	0.02681	18.56	0.0513963
6/14/2018 12:35:00 PM.000	622.5	0.03	0	4.83	0.02431	18.5675	0.0465725
6/14/2018 12:40:00 PM.000	626	0.03	0	4.64	0.01345	18.575	0.0255827
6/14/2018 12:45:00 PM.000	626.8	0.03	0	4.54	0.00764	18.5825	0.0143514
6/14/2018 12:50:00 PM.000	635.8	0.03	0	4.43	0.00584	18.5875	0.0108718
6/14/2018 12:55:00 PM.000	623.9	0.03	0	4.28	0.01875	18.595	0.0358476
6/14/2018 1:00:00 PM.000	639.6	0.03	0	4.1	0.00414	18.6025	0.0075867
6/14/2018 1:05:00 PM.000	659.4	0.03	0	3.86	0.00604	18.6075	0.0112642
6/14/2018 1:10:00 PM.000	657	0.03	0	3.54	0.0056	18.615	0.0104147
6/14/2018 1:15:00 PM.000	645.4	0.03	0	3.3	0.00415	18.62	0.00760941
6/14/2018 1:20:00 PM.000	638.2	0.03	0	2.97	0.00397	18.625	0.00726192
6/14/2018 1:25:00 PM.000	623.1	0.03	0	2.56	0.00475	18.635	0.00877407
6/14/2018 1:30:00 PM.000	382.6	0.03	0	2.27	0.00539	18.64	0.0100145
6/14/2018 1:35:00 PM.000	130.9	0.03	0	1.94	0.00353	18.645	0.00641343
6/14/2018 1:40:00 PM.000	57.2	0.03	0	1.54	0.00272	18.655	0.00484593
6/14/2018 1:45:00 PM.000	182.1	0.03	0	1.4	0.0034	18.665	0.00616482
6/14/2018 1:50:00 PM.000	551.5	0.03	0	1.26	0.00239	18.675	0.00420889
6/14/2018 1:55:00 PM.000	624.5	0.03	0	0.92	0.0026	18.6825	0.00461681
6/14/2018 2:00:00 PM.000	646.6	0.03	0	0.6	0.00289	18.6875	0.00517964
6/14/2018 2:05:00 PM.000	657.8	0.03	0	0.29	0.00322	18.6975	0.00582091
6/14/2018 2:10:00 PM.000	656.1	0.03	0	0.04	0.00162	18.705	0.00271882
6/14/2018 2:15:00 PM.000	659	0.03	0	0	0	18.7125	-0.000423171
6/14/2018 2:20:00 PM.000	647.2	0.03	0	0	0	18.7225	-0.000423153
6/14/2018 2:25:00 PM.000	659.4	0.03	0	0	0	18.7325	-0.000423135
6/14/2018 2:30:00 PM.000	651.7	0.03	0	0	6e-05	18.7425	-0.000306643
6/14/2018 2:35:00 PM.000	636.5	0.03	0	0	0.00045	18.75	0.000650389
6/14/2018 2:40:00 PM.000	639.1	0.05	0	0	0.00092	18.76	0.0073761
6/14/2018 2:45:00 PM.000	655.4	0.2	0	0	0.00163	18.7725	0.0129612
6/14/2018 2:50:00 PM.000	646.1	0.5	0	0	0.00165	18.7775	0.0168795
6/14/2018 2:55:00 PM.000	638.9	1.19	0	0	0.00201	18.785	0.0306058
6/14/2018 3:00:00 PM.000	652.1	1.59	0	0	0.01123	18.795	0.167012
6/14/2018 3:05:00 PM.000	652.9	1.69	0	0	0.02022	18.8025	0.286527
6/14/2018 3:10:00 PM.000	641.1	1.01	0	0.05	0.03697	18.8125	0.346719
6/14/2018 3:15:00 PM.000	629.3	0.67	0	0.14	0.0587	18.82	0.369556
6/14/2018 3:20:00 PM.000	616.7	0.93	0	0.16	0.09594	18.8275	0.844845
6/14/2018 3:25:00 PM.000	637.1	1.25	0	0.22	0.12972	18.835	1.388
6/14/2018 3:30:00 PM.000	644.9	1.55	0	0.3	0.13892	18.8425	1.51599
6/14/2018 3:35:00 PM.000	646.9	1.33	0	0.47	0.14545	18.855	1.42981
6/14/2018 3:40:00 PM.000	646.8	0.85	0	0.64	0.17858	18.8625	1.32451
6/14/2018 3:45:00 PM.000	656.4	0.89	0	0.76	0.20753	18.8675	1.34165
6/14/2018 3:50:00 PM.000	659	0.39	0	0.85	0.26191	18.88	1.6869
6/14/2018 3:55:00 PM.000	631.9	0.04	0	0.87	0.31163	18.8875	0.606608
6/14/2018 4:00:00 PM.000	641.7	0.03	0	0.68	0.33484	18.8925	0.651896
6/14/2018 4:05:00 PM.000	638.7	0.03	0	0.37	0.37488	18.9025	0.730074
6/14/2018 4:10:00 PM.000	610.1	0.03	0	0.13	0.3255	18.91	0.633964
6/14/2018 4:15:00 PM.000	321.3	0.03	0	0.02	0.03655	18.91	0.0708117
6/14/2018 4:20:00 PM.000	118.3	0.23	0	0	0.16527	18.9125	0.199236
6/14/2018 4:25:00 PM.000	62.4	1.22	0	0	0.12555	18.92	1.2852
6/14/2018 4:30:00 PM.000	241.6	1.51	0	0	0.00506	18.9225	0.0614728
6/14/2018 4:35:00 PM.000	567.6	1.46	0	0	0.04809	18.925	0.496379
6/14/2018 4:40:00 PM.000	651.9	0.8	0	0	0.14712	18.9325	1.20984
6/14/2018 4:45:00 PM.000	667.4	0.5	0	0.02	0.06464	18.9325	0.434979
6/14/2018 4:50:00 PM.000	665.6	0.83	0	0.04	0.08261	18.93	0.884961
6/14/2018 4:55:00 PM.000	648.5	1.32	0	0.11	0.16908	18.9375	2.60026
6/14/2018 5:00:00 PM.000	653.2	1.67	0	0.21	0.13024	18.9425	2.3691
6/14/2018 5:05:00 PM.000	642.1	1.9	0	0.33	0.128	18.9425	2.3503
6/14/2018 5:10:00 PM.000	641.2	0.68	0	0.45	0.19924	18.9475	2.13462
6/14/2018 5:15:00 PM.000	639.1	0.67	0	0.53	0.19827	18.95	0.961969
6/14/2018 5:20:00 PM.000	635.7	1.19	0	0.66	0.21186	18.95	2.09483
6/14/2018 5:25:00 PM.000	650.4	1.56	0	0.82	0.24191	18.9525	2.96319
6/14/2018 5:30:00 PM.000	647.6	1.57	0	0.93	0.26348	18.9575	2.66107
6/14/2018 5:35:00 PM.000	628	0.71	0	1.13	0.27082	18.96	1.53716
6/14/2018 5:40:00 PM.000	645.5	0.6	0	1.23	0.32299	18.965	1.45845
6/14/2018 5:45:00 PM.000	644.4	0.89	0	1.23	0.3697	18.97	2.5503
6/14/2018 5:50:00 PM.000	644.9	0.99	0	1.3	0.3766	18.97	2.57675
6/14/2018 5:55:00 PM.000	636.1	1.28	0	1.44	0.39813	18.975	3.09976
6/14/2018 6:00:00 PM.000	649.7	1.63	0	1.61	0.41766	18.975	4.66389
6/14/2018 6:05:00 PM.000	641.3	1.71	0	1.73	0.4125	18.98	4.54642
6/14/2018 6:10:00 PM.000	648.1	1.06	0	1.87	0.42183	18.98	3.26388
6/14/2018 6:15:00 PM.000	623.8	0.83	0	2	0.46367	18.98	3.03223
6/14/2018 6:20:00 PM.000	627.6	0.59	0	2.07	0.50017	18.98	3.28141
6/14/2018 6:25:00 PM.000	630.6	0.06	0	2.15	0.59754	18.9775	0.503484
6/14/2018 6:30:00 PM.000	615.3	0.03	0	2.13	0.67858	18.9775	1.32422
6/14/2018 6:35:00 PM.000	614.7	0.03	0	1.88	0.71936	18.98	1.40391
6/14/2018 6:40:00 PM.000	622.8	0.03	0	1.49	0.77352	18.98	1.50964
6/14/2018 6:45:00 PM.000	613.8	0.03	0	1.28	0.80388	18.975	1.56872
6/14/2018 6:50:00 PM.000	629.4	0.03	0	0.97	0.83427	18.9725	1.62795
6/14/2018 6:55:00 PM.000	610.7	0.03	0	0.64	0.85198	18.9775	1.66271
6/14/2018 7:00:00 PM.000	621.1	0.39	0	0.44	0.79652	18.9725	1.23037
6/14/2018 7:05:00 PM.000	642.4	1.41	0	0.24	0.77197	18.9725	10.5907
6/14/2018 7:10:00 PM.000	638.4	1.67	0	0.26	0.72282	18.97	11.8781
6/14/2018 7:15:00 PM.000	631.2	1.62	0	0.42	0.6742	18.9675	10.8265
6/14/2018 7:20:00 PM.000	630.5	1.18	0	0.59	0.67598	18.965	8.04181
6/14/2018 7:25:00 PM.000	619	0.75	0	0.66	0.69678	18.9675	6.1601
6/14/2018 7:30:00 PM.000	619	0.8	0	0.71	0.68201	18.9675	6.72316
6/14/2018 7:35:00 PM.000	592	0.89	0	0.81	0.68279	18.9625	8.6606
6/14/2018 7:40:00 PM.000	601.4	1.32	0	0.82	0.68188	18.9625	10.3219
6/14/2018 7:45:00 PM.000	611.5	1.9	0	0.89	0.64337	18.9575	10.3224
6/14/2018 7:50:00 PM.000	614.9	2.4	0	1.11	0.60606	18.955	9.64855
6/14/2018 7:55:00 PM.000	602	1.35	0	1.33	0.63646	18.9525	6.01648
6/14/2018 8:00:00 PM.000	606.8	0.79	0	1.5	0.66562	18.9475	3.677
6/14/2018 8:05:00 PM.000	600.5	0.91	0	1.58	0.64047	18.9475	3.56511
6/14/2018 8:10:00 PM.000	608	1.1	0	1.7	0.66794	18.945	4.77396
6/14/2018 8:15:00 PM.000	613.5	1.39	0	1.81	0.69478	18.9375	6.12234
6/14/2018 8:20:00 PM.000	610.3	1.6	0	1.94	0.66033	18.9325	7.95272
6/14/2018 8:25:00 PM.000	619.9	2.14	0	2.08	0.63934	18.93	9.21518
6/14/2018 8:30:00 PM.000	613.1	1.51	0	2.28	0.65717	18.9275	6.73472
6/14/2018 8:35:00 PM.000	607.7	1.1	0	2.43	0.65376	18.9275	4.30751
6/14/2018 8:40:00 PM.000	606.2	0.94	0	2.5	0.64705	18.93	4.0683
6/14/2018 8:45:00 PM.000	452.6	1.27	0	2.67	0.67699	18.9225	4.93414
6/14/2018 8:50:00 PM.000	168.1	1.29	0	2.84	0.67101	18.92	5.38252
6/14/2018 8:55:00 PM.000	81.6	0.38	0	2.91	0.70922	18.925	4.31063
6/14/2018 9:00:00 PM.000	207.8	0.04	0	2.96	0.82133	18.92	1.6007
6/14/2018 9:05:00 PM.000	567.3	0.03	0	2.85	0.87209	18.92	1.69965
6/14/2018 9:10:00 PM.000	645.6	0.03	0	2.69	0.92612	18.915	1.80476
6/14/2018 9:15:00 PM.000	629	0.03	0	2.45	1.00789	18.91	1.96392
6/14/2018 9:20:00 PM.000	639.6	0.03	0	2.17	1.05314	18.9075	2.05198
6/14/2018 9:25:00 PM.000	657	0.03	0	1.96	1.08737	18.9025	2.11844
6/14/2018 9:30:00 PM.000	655.2	0.08	0	1.75	1.1182	18.8975	2.17826
6/14/2018 9:35:00 PM.000	654.6	1.01	0	1.49	1.07456	18.8975	7.26347
6/14/2018 9:40:00 PM.000	661.1	1.68	0	1.48	1.02353	18.89	14.4426
6/14/2018 9:45:00 PM.000	652.7	1.39	0	1.57	0.99127	18.885	11.2938
6/14/2018 9:50:00 PM.000	647.7	0.84	0	1.63	1.00975	18.885	8.55891
6/14/2018 9:55:00 PM.000	640.9	0.67	0	1.66	1.01978	18.8825	7.46134
6/14/2018 10:00:00 PM.000	636.1	0.67	0	1.74	1.02865	18.8775	11.746
6/14/2018 10:05:00 PM.000	643.6	0.76	0	1.77	1.04139	18.875	14.7411
6/14/2018 10:10:00 PM.000	635	1.36	0	1.73	1.00949	18.8725	14.9708
6/14/2018 10:15:00 PM.000	636.9	2.06	0	1.79	0.95167	18.8675	17.3074
6/14/2018 10:20:00 PM.000	636.2	2.4	0	2.03	0.91831	18.865	15.3235
6/14/2018 10:25:00 PM.000	633.1	1.53	0	2.23	0.93889	18.8625	8.65536
6/14/2018 10:30:00 PM.000	629.5	0.97	0	2.35	0.94911	18.8625	6.58086
6/14/2018 10:35:00 PM.000	637.3	0.83	0	2.49	0.90506	18.8575	5.42854
6/14/2018 10:40:00 PM.000	640.1	1.49	0	2.66	0.93046	18.8525	9.07859
6/14/2018 10:45:00 PM.000	655.8	2.04	0	2.76	0.91105	18.8475	11.225
6/14/2018 10:50:00 PM.000	646	1.33	0	2.85	0.88976	18.845	8.23153
6/14/2018 10:55:00 PM.000	625.8	0.9	0	3.03	0.89333	18.84	4.97654
6/14/2018 11:00:00 PM.000	621.7	1.27	0	3.15	0.89355	18.835	6.21584
6/14/2018 11:05:00 PM.000	625.9	1.66	0	3.2	0.8671	18.8325	7.8002
6/14/2018 11:10:00 PM.000	620.8	1.42	0	3.31	0.85036	18.8275	7.07225
6/14/2018 11:15:00 PM.000	616.6	1.08	0	3.47	0.86113	18.8225	4.8971
6/14/2018 11:20:00 PM.000	626.5	0.73	0	3.62	0.86068	18.8225	4.57314
6/14/2018 11:25:00 PM.000	624	0.08	0	3.75	0.92759	18.815	0.892031
6/14/2018 11:30:00 PM.000	621.6	0.03	0	3.73	1.04333	18.81	2.02817
6/14/2018 11:35:00 PM.000	613.6	0.03	0	3.45	1.06891	18.8125	2.07803
6/14/2018 11:40:00 PM.000	599.1	0.03	0	3.14	1.12573	18.8075	2.18825
6/14/2018 11:45:00 PM.000	619.9	0.03	0	2.97	1.19646	18.8	2.32535
6/14/2018 11:50:00 PM.000	617.8	0.03	0	2.71	1.22266	18.8	2.37628
6/14/2018 11:55:00 PM.000	603.2	0.03	0	2.44	1.24962	18.7975	2.42855
6/15/2018 12:00:00 AM.000	615.3	0.04	0	2.2	1.26196	18.7875	2.45195
6/15/2018 12:05:00 AM.000	615.4	0.25	0	1.92	1.23898	18.7875	5.20008
6/15/2018 12:10:00 AM.000	609.3	0.62	0	1.75	1.20888	18.785	12.5045
6/15/2018 12:15:00 AM.000	598	0.99	0	1.79	1.14833	18.775	14.5349
6/15/2018 12:20:00 AM.000	590.3	1.26	0	1.86	1.10292	18.7725	16.2188
6/15/2018 12:25:00 AM.000	594.1	1.82	0	1.82	1.03667	18.7725	18.7148
6/15/2018 12:30:00 AM.000	604.8	2.2	0	1.95	0.96709	18.7675	17.1236
6/15/2018 12:35:00 AM.000	585.3	1.94	0	2.19	0.94173	18.7625	14.994
6/15/2018 12:40:00 AM.000	583.5	1.51	0	2.34	0.92277	18.76	11.9611
6/15/2018 12:45:00 AM.000	594.9	1.35	0	2.4	0.90048	18.7575	11.4048
6/15/2018 12:50:00 AM.000	589.4	2.02	0	2.56	0.84052	18.7525	13.1254
6/15/2018 12:55:00 AM.000	585	2.29	0	2.75	0.84105	18.7475	12.9344
6/15/2018 1:00:00 AM.000	593.8	1.25	0	2.87	0.86513	18.745	6.68966
6/15/2018 1:05:00 AM.000	601.9	0.7	0	3.02	0.84922	18.745	3.56369
6/15/2018 1:10:00 AM.000	599.4	0.79	0	3.14	0.85435	18.7375	4.21022
6/15/2018 1:15:00 AM.000	589.8	1.23	0	3.22	0.89124	18.7325	7.60507
6/15/2018 1:20:00 AM.000	570.6	1.49	0	3.33	0.86146	18.73	9.93568
6/15/2018 1:25:00 AM.000	579.7	1.96	0	3.48	0.81769	18.725	9.91968
6/15/2018 1:30:00 AM.000	576.6	1.98	0	3.57	0.82019	18.7225	8.82054
6/15/2018 1:35:00 AM.000	565.5	1.31	0	3.74	0.81634	18.7225	5.372
6/15/2018 1:40:00 AM.000	578.3	1.05	0	3.91	0.79328	18.7175	4.60535
6/15/2018 1:45:00 AM.000	575.5	0.97	0	4.01	0.7946	18.715	4.77897
6/15/2018 1:50:00 AM.000	578.1	1.34	0	4.11	0.79307	18.715	5.92458
6/15/2018 1:55:00 AM.000	578.8	1.42	0	4.22	0.76774	18.71	6.02878
6/15/2018 2:00:00 AM.000	577.8	0.33	0	4.35	0.8037	18.7075	2.62178
6/15/2018 2:05:00 AM.000	586.3	0.05	0	4.41	0.93136	18.7	1.80574
6/15/2018 2:10:00 AM.000	590.1	0.03	0	4.3	0.93588	18.7025	1.81462
6/15/2018 2:15:00 AM.000	582.8	0.03	0	4.04	1.0018	18.7	1.94235
6/15/2018 2:20:00 AM.000	593.2	0.03	0	3.77	1.08012	18.69	2.09373
6/15/2018 2:25:00 AM.000	586.2	0.03	0	3.54	1.09115	18.69	2.11512
6/15/2018 2:30:00 AM.000	579	0.03	0	3.2	1.13617	18.6875	2.20227
6/15/2018 2:35:00 AM.000	577	0.03	0	2.99	1.15441	18.6825	2.23737
6/15/2018 2:40:00 AM.000	577.1	0.14	0	2.71	1.12754	18.675	1.5392
6/15/2018 2:45:00 AM.000	580.8	0.52	0	2.5	1.1256	18.6725	10.5202
6/15/2018 2:50:00 AM.000	584.6	0.76	0	2.48	1.07834	18.6675	10.5656
6/15/2018 2:55:00 AM.000	572.4	0.85	0	2.55	1.04926	18.6625	11.3563
6/15/2018 3:00:00 AM.000	582	1	0	2.51	1.02447	18.6575	15.0313
6/15/2018 3:05:00 AM.000	593.9	1.28	0	2.56	0.99406	18.6575	17.3532
6/15/2018 3:10:00 AM.000	588.5	1.5	0	2.64	0.92685	18.6525	15.3592
6/15/2018 3:15:00 AM.000	580.8	1.73	0	2.72	0.89692	18.6475	12.9959
6/15/2018 3:20:00 AM.000	590.7	1.83	0	2.89	0.88311	18.645	13.6436
6/15/2018 3:25:00 AM.000	587.3	2	0	3.08	0.83424	18.6425	9.65849
6/15/2018 3:30:00 AM.000	592.8	1.61	0	3.22	0.83241	18.6375	8.05132
6/15/2018 3:35:00 AM.000	581.6	1.46	0	3.41	0.8357	18.6375	10.1725
6/15/2018 3:40:00 AM.000	371.3	1.92	0	3.52	0.7945	18.6325	10.3996
6/15/2018 3:45:00 AM.000	144.3	1.9	0	3.66	0.76725	18.6275	10.8829
6/15/2018 3:50:00 AM.000	69	1	0	3.85	0.80385	18.625	5.05508
6/15/2018 3:55:00 AM.000	36.3	0.74	0	3.96	0.80653	18.6275	3.57275
6/15/2018 4:00:00 AM.000	9.2	1.13	0	4.07	0.77009	18.6225	4.96697
6/15/2018 4:05:00 AM.000	15.2	1.83	0	4.19	0.77611	18.625	7.21807
6/15/2018 4:10:00 AM.000	223.2	1.83	0	4.32	0.78406	18.6225	8.00078
6/15/2018 4:15:00 AM.000	553.6	1.45	0	4.41	0.73183	18.62	3.46176
6/15/2018 4:20:00 AM.000	623.4	1.09	0	4.57	0.74788	18.615	3.21574
6/15/2018 4:25:00 AM.000	643	0.87	0	4.73	0.76244	18.6125	3.05382
6/15/2018 4:30:00 AM.000	646.8	0.37	0	4.83	0.75474	18.6075	2.38277
6/15/2018 4:35:00 AM.000	621.9	0.05	0	4.88	0.84667	18.6	1.63762
6/15/2018 4:40:00 AM.000	634.1	0.03	0	4.8	0.91467	18.5975	1.76907
6/15/2018 4:45:00 AM.000	634.4	0.03	0	4.49	0.92768	18.595	1.79413
6/15/2018 4:50:00 AM.000	475.5	0.03	0	4.26	0.99119	18.5875	1.91665
6/15/2018 4:55:00 AM.000	172.5	0.03	0	4.08	1.04816	18.5825	2.02659
6/15/2018 5:00:00 AM.000	73	0.03	0	3.64	1.06977	18.5825	2.06838
6/15/2018 5:05:00 AM.000	44.1	0.03	0	3.49	1.10491	18.5825	2.13634
6/15/2018 5:10:00 AM.000	45	0.03	0	3.37	1.1649	18.5825	2.25235
6/15/2018 5:15:00 AM.000	8.4	0.03	0	3.16	1.17091	18.5825	2.26398
6/15/2018 5:20:00 AM.000	4.1	0.03	0	2.97	1.19242	18.58	2.30544
6/15/2018 5:25:00 AM.000	227.2	0.36	0	2.89	1.17812	18.5775	2.27765
6/15/2018 5:30:00 AM.000	583	1.67	0	2.77	1.0836	18.5775	9.23758
6/15/2018 5:35:00 AM.000	627.8	1.62	0	2.81	1.02534	18.57	11.2561
6/15/2018 5:40:00 AM.000	635.8	1.7	0	3.01	1.01627	18.5675	11.0847
6/15/2018 5:45:00 AM.000	624.1	1.2	0	3.15	0.9752	18.56	5.75485
6/15/2018 5:50:00 AM.000	630.9	0.68	0	3.29	0.96164	18.5575	4.31027
6/15/2018 5:55:00 AM.000	624.6	0.96	0	3.36	0.93567	18.555	4.38867
6/15/2018 6:00:00 AM.000	565.4	1.47	0	3.43	0.90311	18.5525	7.42233
6/15/2018 6:05:00 AM.000	248.5	1.89	0	3.53	0.86496	18.55	10.5357
6/15/2018 6:10:00 AM.000	104.5	2.21	0	3.7	0.82992	18.5475	8.51171
6/15/2018 6:15:00 AM.000	57.2	1.9	0	3.85	0.81483	18.5475	4.59806
6/15/2018 6:20:00 AM.000	46.4	1.53	0	4.02	0.80403	18.5475	3.57422
6/15/2018 6:25:00 AM.000	42.1	0.93	0	4.22	0.79612	18.5475	2.99648
6/15/2018 6:30:00 AM.000	2.4	0.31	0	4.31	0.80082	18.545	0.104899
6/15/2018 6:35:00 AM.000	-2.6	0.05	0	4.36	0.84603	18.5425	1.63415
6/15/2018 6:40:00 AM.000	-2.8	0.03	0	4.28	0.85529	18.5475	1.65223
6/15/2018 6:45:00 AM.000	-2.5	0.03	0	4.12	0.86527	18.545	1.67142
6/15/2018 6:50:00 AM.000	-0.2	0.03	0	3.99	0.91341	18.5475	1.76454
6/15/2018 6:55:00 AM.000	382.9	0.03	0	3.87	0.90869	18.5475	1.75542
6/15/2018 7:00:00 AM.000	624.1	0.03	0	3.75	0.76693	18.5425	1.48132
6/15/2018 7:05:00 AM.000	649.4	0.03	0	3.58	0.7066	18.54	1.36468
6/15/2018 7:10:00 AM.000	660.8	0.14	0	3.34	0.74856	18.5375	0.544528
6/15/2018 7:15:00 AM.000	448.7	0.37	0	3.21	0.56854	18.54	3.43737
6/15/2018 7:20:00 AM.000	510.4	0.76	0	3.23	0.47744	18.535	4.0976
6/15/2018 7:25:00 AM.000	622.5	1.34	0	3.19	0.54076	18.535	5.22172
6/15/2018 7:30:00 AM.000	609.4	1.76	0	3.17	0.50897	18.5375	5.83654
6/15/2018 7:35:00 AM.000	283.7	1.79	0	3.39	0.42151	18.535	5.79808
6/15/2018 7:40:00 AM.000	108.8	1.14	0	3.52	0.45826	18.54	3.6933
6/15/2018 7:45:00 AM.000	57.4	0.7	0	3.61	0.49023	18.5425	2.07446
6/15/2018 7:50:00 AM.000	44.2	0.85	0	3.76	0.4292	18.5425	2.08292
6/15/2018 7:55:00 AM.000	8.6	1.48	0	3.84	0.42372	18.5425	3.4856
6/15/2018 8:00:00 AM.000	-1.5	2.26	0	3.89	0.44872	18.5475	5.81031
6/15/2018 8:05:00 AM.000	263	2.07	0	4.03	0.40947	18.55	2.85492
6/15/2018 8:10:00 AM.000	604.5	1.9	0	4.19	0.39617	18.5525	1.64599
6/15/2018 8:15:00 AM.000	641.9	1.7	0	4.25	0.42415	18.5525	1.29093
6/15/2018 8:20:00 AM.000	648.7	0.88	0	4.4	0.40791	18.5575	0.545902
6/15/2018 8:25:00 AM.000	643.8	0.29	0	4.49	0.40246	18.5575	0.777425
6/15/2018 8:30:00 AM.000	638.6	0.05	0	4.48	0.32641	18.5625	0.630515
6/15/2018 8:35:00 AM.000	526.3	0.03	0	4.38	0.1704	18.5625	0.328954
6/15/2018 8:40:00 AM.000	203.3	0.03	0	4.1	0.12794	18.5675	0.246909
6/15/2018 8:45:00 AM.000	93.6	0.03	0	3.83	0.03196	18.57	0.0613651
6/15/2018 8:50:00 AM.000	54	0.03	0	3.63	0.00551	18.5775	0.010231
6/15/2018 8:55:00 AM.000	95.3	0.03	0	3.45	0.004	18.5775	0.00731119
6/15/2018 9:00:00 AM.000	336.8	0.03	0	3.23	0.00335	18.585	0.00605548
6/15/2018 9:05:00 AM.000	585.6	0.03	0	3.1	0.00325	18.5875	0.00586246
6/15/2018 9:10:00 AM.000	652	0.03	0	2.9	0.00313	18.5925	0.0056311
6/15/2018 9:15:00 AM.000	652	0.03	0	2.59	0.00367	18.5975	0.00667649
6/15/2018 9:20:00 AM.000	645.8	0.03	0	2.28	0.00362	18.6	0.00658018
6/15/2018 9:25:00 AM.000	648.8	0.09	0	2.03	0.00266	18.6075	0.00472381
6/15/2018 9:30:00 AM.000	657.9	0.45	0	1.77	0.00326	18.6175	0.0197757
6/15/2018 9:35:00 AM.000	632.4	1.21	0	1.71	0.00972	18.6225	0.093371
6/15/2018 9:40:00 AM.000	443.1	1.53	0	1.83	0.01273	18.6275	0.169049
6/15/2018 9:45:00 AM.000	162.5	1.68	0	1.94	0.01766	18.6325	0.258518
6/15/2018 9:50:00 AM.000	106.4	0.89	0	1.99	0.02999	18.6375	0.21734
6/15/2018 9:55:00 AM.000	248.4	0.54	0	2.12	0.047	18.6425	0.238434
6/15/2018 10:00:00 AM.000	498.3	0.8	0	2.28	0.07931	18.6425	0.519518
6/15/2018 10:05:00 AM.000	618.6	1.08	0	2.27	0.09258	18.645	0.855675
6/15/2018 10:10:00 AM.000	651.7	1.66	0	2.3	0.0955	18.65	1.15835
6/15/2018 10:15:00 AM.000	648.1	1.86	0	2.52	0.10966	18.655	1.32755
6/15/2018 10:20:00 AM.000	642.2	0.76	0	2.73	0.12684	18.6625	0.722703
6/15/2018 10:25:00 AM.000	651.5	0.08	0	2.71	0.17526	18.665	0.0835193
6/15/2018 10:30:00 AM.000	643.3	0.03	0	2.68	0.23651	18.675	0.457964
6/15/2018 10:35:00 AM.000	638.6	0.03	0	2.53	0.27858	18.68	0.539565
6/15/2018 10:40:00 AM.000	652.6	0.03	0	2.16	0.31138	18.6825	0.603179
6/15/2018 10:45:00 AM.000	639.2	0.03	0	1.97	0.32177	18.6875	0.623393
6/15/2018 10:50:00 AM.000	629.3	0.05	0	1.77	0.33006	18.6975	0.639617
6/15/2018 10:55:00 AM.000	612.3	0.31	0	1.5	0.35169	18.7025	1.94882
6/15/2018 11:00:00 AM.000	617.4	0.66	0	1.42	0.2982	18.71	3.19449
6/15/2018 11:05:00 AM.000	627.1	0.94	0	1.41	0.26131	18.7125	3.50414
6/15/2018 11:10:00 AM.000	642.8	1.82	0	1.33	0.28785	18.7175	4.62179
6/15/2018 11:15:00 AM.000	635.4	2.37	0	1.42	0.27057	18.73	3.76135
6/15/2018 11:20:00 AM.000	642.5	0.89	0	1.78	0.25527	18.735	1.35517
6/15/2018 11:25:00 AM.000	644.3	0.5	0	1.86	0.29046	18.745	1.20371
6/15/2018 11:30:00 AM.000	626	1.43	0	1.86	0.29133	18.755	2.89114
6/15/2018 11:35:00 AM.000	608.3	1.97	0	2.11	0.28321	18.7675	4.18239
6/15/2018 11:40:00 AM.000	605.1	1.08	0	2.23	0.30529	18.7725	2.42875
6/15/2018 11:45:00 AM.000	601.9	0.1	0	2.19	0.34951	18.7825	0.273082
6/15/2018 11:50:00 AM.000	617.7	0.03	0	2.26	0.40032	18.79	0.777568
6/15/2018 11:55:00 AM.000	598.5	0.03	0	2.1	0.43994	18.8	0.854769
6/15/2018 12:00:00 PM.000	598.7	0.03	0	1.72	0.47845	18.81	0.929848
6/15/2018 12:05:00 PM.000	597.1	0.03	0	1.55	0.45044	18.8175	0.875543
6/15/2018 12:10:00 PM.000	596.7	0.06	0	1.32	0.4606	18.8275	0.895514
6/15/2018 12:15:00 PM.000	599.2	0.54	0	0.99	0.48166	18.8375	3.08384
6/15/2018 12:20:00 PM.000	616.6	0.89	0	0.88	0.40263	18.845	5.04238
6/15/2018 12:25:00 PM.000	615.8	1.44	0	0.69	0.36657	18.86	4.48009
6/15/2018 12:30:00 PM.000	610	1.27	0	0.84	0.41021	18.8525	4.31624
6/15/2018 12:35:00 PM.000	587.6	0.85	0	1.01	0.40286	18.855	3.56129
6/15/2018 12:40:00 PM.000	595.9	0.63	0	1.15	0.37934	18.8825	3.59062
6/15/2018 12:45:00 PM.000	613.2	1.02	0	1.1	0.40108	18.875	5.63718
6/15/2018 12:50:00 PM.000	604.6	1.68	0	1.1	0.40091	18.88	5.50515
6/15/2018 12:55:00 PM.000	596.1	2.31	0	1.27	0.36445	18.885	4.32939
6/15/2018 1:00:00 PM.000	612.4	2.08	0	1.53	0.35938	18.895	5.93652
6/15/2018 1:05:00 PM.000	631	1.87	0	1.69	0.39135	18.9075	5.45884
6/15/2018 1:10:00 PM.000	627.5	1.38	0	1.85	0.35942	18.9125	2.72085
6/15/2018 1:15:00 PM.000	607.6	0.9	0	2.05	0.39287	18.9225	2.16316
6/15/2018 1:20:00 PM.000	601.6	0.65	0	2.14	0.42488	18.93	2.94404
6/15/2018 1:25:00 PM.000	581.1	1.41	0	2.11	0.42182	18.9325	4.10869
6/15/2018 1:30:00 PM.000	586.8	1.95	0	2.26	0.41655	18.9375	4.72681
6/15/2018 1:35:00 PM.000	596.9	1.41	0	2.39	0.432	18.945	3.7681
6/15/2018 1:40:00 PM.000	589.4	0.86	0	2.47	0.4418	18.9525	2.45793
6/15/2018 1:45:00 PM.000	597.3	0.08	0	2.64	0.50906	18.9625	0.276602
6/15/2018 1:50:00 PM.000	605.1	0.03	0	2.59	0.60288	18.97	1.17624
6/15/2018 1:55:00 PM.000	592.8	0.03	0	2.32	0.63694	18.9775	1.24294
6/15/2018 2:00:00 PM.000	603.8	0.03	0	2	0.67372	18.9825	1.31489
6/15/2018 2:05:00 PM.000	612.3	0.03	0	1.76	0.7083	18.9925	1.38273
6/15/2018 2:10:00 PM.000	615.9	0.12	0	1.44	0.71739	19	1.40073
6/15/2018 2:15:00 PM.000	613	0.88	0	1.2	0.70504	19.0125	4.6469
6/15/2018 2:20:00 PM.000	614.2	1	0	1.19	0.67203	19.02	8.32841
6/15/2018 2:25:00 PM.000	609.1	1.26	0	1.22	0.63725	19.025	7.55118
6/15/2018 2:30:00 PM.000	586.1	1.54	0	1.23	0.63012	19.035	8.6149
6/15/2018 2:35:00 PM.000	576.5	2.04	0	1.31	0.60184	19.0425	6.32342
6/15/2018 2:40:00 PM.000	569	1.1	0	1.57	0.60061	19.0475	4.35007
6/15/2018 2:45:00 PM.000	580.7	0.6	0	1.69	0.63349	19.0525	2.73474
6/15/2018 2:50:00 PM.000	624	1.08	0	1.69	0.61026	19.0575	3.82123
6/15/2018 2:55:00 PM.000	1147.6	1.31	0	1.87	0.60141	19.0575	7.20835
6/15/2018 3:00:00 PM.000	770.7	1.9	0	2.01	0.60352	19.06	7.73178
6/15/2018 3:05:00 PM.000	641.8	1.46	0	2.07	0.59037	19.065	4.99997
6/15/2018 3:10:00 PM.000	646.7	0.18	0	2.21	0.64049	19.0725	1.10737
6/15/2018 3:15:00 PM.000	643	0.04	0	2.25	0.71856	19.085	1.40585
6/15/2018 3:20:00 PM.000	638.8	0.03	0	1.97	0.73583	19.085	1.43965
6/15/2018 3:25:00 PM.000	635.3	0.03	0	1.69	0.76246	19.09	1.49194
6/15/2018 3:30:00 PM.000	634.6	0.03	0	1.48	0.76478	19.0975	1.49675
6/15/2018 3:35:00 PM.000	618.4	0.12	0	1.16	0.76168	19.105	1.49094
6/15/2018 3:40:00 PM.000	618.2	0.56	0	0.81	0.74669	19.1075	6.64211
6/15/2018 3:45:00 PM.000	622.5	0.94	0	0.8	0.6713	19.1125	11.0651
6/15/2018 3:50:00 PM.000	600.8	1.48	0	0.81	0.62998	19.1175	9.59432
6/15/2018 3:55:00 PM.000	588.8	1.55	0	0.84	0.63396	19.125	8.43596
6/15/2018 4:00:00 PM.000	595.7	1.17	0	0.96	0.61487	19.1275	5.36001
6/15/2018 4:05:00 PM.000	610.7	0.59	0	1.06	0.60412	19.13	4.92841
6/15/2018 4:10:00 PM.000	615.8	0.89	0	1.08	0.62361	19.1325	7.69751
6/15/2018 4:15:00 PM.000	605	1.5	0	1.1	0.61728	19.13	8.83912
6/15/2018 4:20:00 PM.000	595.2	1.49	0	1.23	0.58796	19.1375	9.76998
6/15/2018 4:25:00 PM.000	595.8	2.08	0	1.35	0.5518	19.14	10.5294
6/15/2018 4:30:00 PM.000	599.6	2.25	0	1.49	0.55593	19.1425	8.87199
6/15/2018 4:35:00 PM.000	585.4	1.2	0	1.69	0.57467	19.1475	3.32936
6/15/2018 4:40:00 PM.000	588.8	0.51	0	1.82	0.61608	19.155	3.3166
6/15/2018 4:45:00 PM.000	609.9	0.94	0	1.76	0.59576	19.1575	3.64182
6/15/2018 4:50:00 PM.000	598.8	1.83	0	1.87	0.59723	19.155	7.41926
6/15/2018 4:55:00 PM.000	612.1	2.27	0	2.06	0.60994	19.155	9.38302
6/15/2018 5:00:00 PM.000	627.7	1.27	0	2.17	0.57969	19.1575	3.68038
6/15/2018 5:05:00 PM.000	629.6	0.8	0	2.27	0.60915	19.155	3.62541
6/15/2018 5:10:00 PM.000	623.9	0.88	0	2.43	0.62596	19.1575	4.18296
6/15/2018 5:15:00 PM.000	622.3	1.84	0	2.47	0.60589	19.16	7.24984
6/15/2018 5:20:00 PM.000	622.3	1.91	0	2.55	0.59048	19.1575	6.62159
6/15/2018 5:25:00 PM.000	628.5	1.46	0	2.78	0.5948	19.155	4.0694
6/15/2018 5:30:00 PM.000	618.7	1.16	0	2.92	0.59067	19.1575	3.34713
6/15/2018 5:35:00 PM.000	591.1	0.31	0	3.01	0.61602	19.1575	2.10928
6/15/2018 5:40:00 PM.000	596	0.04	0	3.03	0.73509	19.1525	1.4405
6/15/2018 5:45:00 PM.000	613.4	0.03	0	2.77	0.76808	19.155	1.50526
6/15/2018 5:50:00 PM.000	614	0.03	0	2.45	0.80806	19.1625	1.58391
6/15/2018 5:55:00 PM.000	612	0.03	0	2.31	0.88179	19.1575	1.72827
6/15/2018 6:00:00 PM.000	609.2	0.03	0	2.09	0.9001	19.155	1.76406
6/15/2018 6:05:00 PM.000	607.5	0.03	0	1.71	0.91116	19.155	1.78574
6/15/2018 6:10:00 PM.000	626.7	0.4	0	1.47	0.89695	19.155	1.68385
6/15/2018 6:15:00 PM.000	621	1.69	0	1.24	0.83157	19.155	15.2037
6/15/2018 6:20:00 PM.000	610.1	2.1	0	1.24	0.76394	19.1575	12.7126
6/15/2018 6:25:00 PM.000	624.2	0.96	0	1.46	0.77238	19.16	5.95593
6/15/2018 6:30:00 PM.000	619.9	0.47	0	1.54	0.80593	19.1575	4.67788
6/15/2018 6:35:00 PM.000	602.4	0.96	0	1.44	0.76336	19.16	11.7262
6/15/2018 6:40:00 PM.000	610.2	2.06	0	1.48	0.70651	19.16	14.1761
6/15/2018 6:45:00 PM.000	603.6	2.37	0	1.67	0.69786	19.1575	12.7582
6/15/2018 6:50:00 PM.000	593	1.19	0	1.85	0.71511	19.1575	6.19122
6/15/2018 6:55:00 PM.000	589.7	0.64	0	1.96	0.7108	19.16	3.82974
6/15/2018 7:00:00 PM.000	583.8	1.13	0	2.05	0.68692	19.1575	6.26481
6/15/2018 7:05:00 PM.000	583.8	2.07	0	2.19	0.68993	19.1525	9.59181
6/15/2018 7:10:00 PM.000	598.6	1.98	0	2.32	0.68188	19.15	11.3798
6/15/2018 7:15:00 PM.000	587.8	1.54	0	2.41	0.64302	19.15	4.63788
6/15/2018 7:20:00 PM.000	594.3	1.32	0	2.6	0.65009	19.15	3.88194
6/15/2018 7:25:00 PM.000	610.1	0.83	0	2.77	0.65953	19.145	4.23794
6/15/2018 7:30:00 PM.000	607.6	0.27	0	2.78	0.69396	19.1425	3.59455
6/15/2018 7:35:00 PM.000	591.4	0.04	0	2.74	0.76625	19.1375	1.50105
6/15/2018 7:40:00 PM.000	596.8	0.03	0	2.62	0.82908	19.135	1.62407
6/15/2018 7:45:00 PM.000	603.8	0.03	0	2.32	0.85473	19.1375	1.67442
6/15/2018 7:50:00 PM.000	602.3	0.03	0	2.09	0.89287	19.1325	1.74895
6/15/2018 7:55:00 PM.000	586	0.03	0	1.92	0.91231	19.1275	1.78683
6/15/2018 8:00:00 PM.000	577.7	0.03	0	1.55	0.92369	19.1275	1.80912
6/15/2018 8:05:00 PM.000	598.7	0.04	0	1.33	0.89883	19.1225	1.76021
6/15/2018 8:10:00 PM.000	586.8	0.27	0	1.14	0.86049	19.12	3.42177
6/15/2018 8:15:00 PM.000	576.9	0.74	0	0.94	0.82787	19.1175	9.75836
6/15/2018 8:20:00 PM.000	593.6	0.91	0	0.88	0.765	19.115	9.59303
6/15/2018 8:25:00 PM.000	587.2	1.13	0	0.92	0.71141	19.11	10.1983
6/15/2018 8:30:00 PM.000	591.8	1.79	0	0.92	0.67835	19.105	11.8367
6/15/2018 8:35:00 PM.000	593.2	1.9	0	1	0.64752	19.11	8.02525
6/15/2018 8:40:00 PM.000	593.2	1.85	0	1.2	0.60257	19.1025	7.19215
6/15/2018 8:45:00 PM.000	590.2	1.71	0	1.4	0.60339	19.095	9.74022
6/15/2018 8:50:00 PM.000	589.2	2.15	0	1.56	0.59253	19.095	9.06784
6/15/2018 8:55:00 PM.000	576	1.43	0	1.74	0.57661	19.0925	5.41239
6/15/2018 9:00:00 PM.000	589.4	0.97	0	1.91	0.58106	19.0825	3.32769
6/15/2018 9:05:00 PM.000	497.2	0.93	0	1.98	0.60774	19.08	4.60254
6/15/2018 9:10:00 PM.000	210	1.66	0	2.02	0.58832	19.075	6.82387
6/15/2018 9:15:00 PM.000	100.9	1.93	0	2.13	0.56113	19.075	7.38159
6/15/2018 9:20:00 PM.000	191.6	1.35	0	2.33	0.57756	19.0725	4.22501
6/15/2018 9:25:00 PM.000	568.5	0.91	0	2.5	0.5766	19.0725	2.33817
6/15/2018 9:30:00 PM.000	658.7	0.24	0	2.63	0.60711	19.0675	2.39759
6/15/2018 9:35:00 PM.000	639	0.04	0	2.66	0.69235	19.055	1.35359
6/15/2018 9:40:00 PM.000	643.1	0.03	0	2.46	0.73727	19.06	1.44161
6/15/2018 9:45:00 PM.000	657.5	0.03	0	2.08	0.76483	19.0525	1.49525
6/15/2018 9:50:00 PM.000	647.8	0.03	0	1.88	0.80728	19.0475	1.57807
6/15/2018 9:55:00 PM.000	624	0.03	0	1.68	0.81809	19.0425	1.59902
6/15/2018 10:00:00 PM.000	628.3	0.03	0	1.31	0.82172	19.045	1.60621
6/15/2018 10:05:00 PM.000	632.8	0.04	0	1.07	0.78142	19.0325	1.52697
6/15/2018 10:10:00 PM.000	640.1	0.59	0	0.86	0.72616	19.0275	3.86433
6/15/2018 10:15:00 PM.000	620	1.45	0	0.71	0.68685	19.0225	10.8464
6/15/2018 10:20:00 PM.000	612.3	1.77	0	0.76	0.6247	19.0225	8.15741
6/15/2018 10:25:00 PM.000	613	1.54	0	0.95	0.59675	19.0125	7.47922
6/15/2018 10:30:00 PM.000	613.6	1.09	0	1.07	0.61598	19.01	5.65786
6/15/2018 10:35:00 PM.000	595.6	1.03	0	1.15	0.60037	19.01	4.89605
6/15/2018 10:40:00 PM.000	588.5	1.42	0	1.27	0.556	19.005	5.65199
6/15/2018 10:45:00 PM.000	591.6	1.63	0	1.45	0.57077	19	5.97119
6/15/2018 10:50:00 PM.000	576.2	1.43	0	1.51	0.56691	18.9975	5.23615
6/15/2018 10:55:00 PM.000	375.2	0.32	0	1.64	0.57671	18.9925	2.98379
6/15/2018 11:00:00 PM.000	545.4	0.04	0	1.71	0.63687	18.9875	1.2431
6/15/2018 11:05:00 PM.000	646.3	0.03	0	1.55	0.66005	18.985	1.28828
6/15/2018 11:10:00 PM.000	662.3	0.03	0	1.29	0.66211	18.9825	1.29222
6/15/2018 11:15:00 PM.000	658.7	0.03	0	1.06	0.65325	18.9775	1.27478
6/15/2018 11:20:00 PM.000	663	0.03	0	0.87	0.6185	18.97	1.20673
6/15/2018 11:25:00 PM.000	627.8	0.39	0	0.57	0.61153	18.9725	1.61531
6/15/2018 11:30:00 PM.000	316.7	0.93	0	0.42	0.55401	18.965	6.9682
6/15/2018 11:35:00 PM.000	121.4	1.38	0	0.45	0.47178	18.9625	6.11164
6/15/2018 11:40:00 PM.000	60.7	2.02	0	0.52	0.46571	18.965	6.36713
6/15/2018 11:45:00 PM.000	49.4	1.23	0	0.71	0.49351	18.96	3.93131
6/15/2018 11:50:00 PM.000	24.3	0.44	0	0.84	0.46019	18.96	1.85721
6/15/2018 11:55:00 PM.000	136.4	0.84	0	0.83	0.45476	18.96	3.56814
6/16/2018 12:00:00 AM.000	569	1.72	0	0.89	0.46863	18.9575	7.1653
6/16/2018 12:05:00 AM.000	662.4	2.29	0	1.1	0.43881	18.95	6.91691
6/16/2018 12:10:00 AM.000	678.3	1.48	0	1.28	0.42418	18.9475	4.39036
6/16/2018 12:15:00 AM.000	677.6	1.1	0	1.35	0.44019	18.945	2.21269
6/16/2018 12:20:00 AM.000	665.9	0.66	0	1.53	0.45207	18.9425	2.28086
6/16/2018 12:25:00 AM.000	658.9	0.79	0	1.63	0.45323	18.9325	2.25568
6/16/2018 12:30:00 AM.000	660.4	1.27	0	1.67	0.45713	18.93	3.35391
6/16/2018 12:35:00 AM.000	635.2	1.79	0	1.77	0.44949	18.9275	5.37286
6/16/2018 12:40:00 AM.000	634	2.15	0	1.94	0.43166	18.9225	5.98428
6/16/2018 12:45:00 AM.000	631.5	1.6	0	2.09	0.42027	18.9175	3.6707
6/16/2018 12:50:00 AM.000	617.7	0.72	0	2.22	0.4449	18.9175	2.07488
6/16/2018 12:55:00 AM.000	607.6	0.07	0	2.29	0.50033	18.9075	0.974643
6/16/2018 1:00:00 AM.000	613.8	0.03	0	2.19	0.52815	18.905	1.0288
6/16/2018 1:05:00 AM.000	552.5	0.03	0	1.98	0.5702	18.9	1.11061
6/16/2018 1:10:00 AM.000	247.4	0.03	0	1.76	0.61003	18.8975	1.18815
6/16/2018 1:15:00 AM.000	109.7	0.03	0	1.59	0.61628	18.895	1.20026
6/16/2018 1:20:00 AM.000	249.4	0.4	0	1.35	0.62627	18.8975	1.13715
6/16/2018 1:25:00 AM.000	601.2	0.99	0	1.27	0.61573	18.895	5.93392
6/16/2018 1:30:00 AM.000	655.8	0.55	0	1.38	0.56521	18.8875	4.75647
6/16/2018 1:35:00 AM.000	650.2	0.79	0	1.3	0.56485	18.88	6.87251
6/16/2018 1:40:00 AM.000	663.4	1.17	0	1.27	0.56004	18.8825	8.4967
6/16/2018 1:45:00 AM.000	662.6	1.55	0	1.44	0.5086	18.8775	9.07757
6/16/2018 1:50:00 AM.000	580.8	1.86	0	1.56	0.48151	18.87	7.89818
6/16/2018 1:55:00 AM.000	246.2	1.88	0	1.56	0.49129	18.87	6.40967
6/16/2018 2:00:00 AM.000	106.5	1.34	0	1.74	0.47082	18.8725	4.37477
6/16/2018 2:05:00 AM.000	63.5	1.02	0	1.98	0.47753	18.87	3.18514
6/16/2018 2:10:00 AM.000	50.1	0.97	0	2.02	0.51566	18.8675	3.13581
6/16/2018 2:15:00 AM.000	40	1.24	0	2.02	0.49869	18.87	5.12247
6/16/2018 2:20:00 AM.000	332.5	1.3	0	2.17	0.48344	18.87	4.6356
6/16/2018 2:25:00 AM.000	634.9	1.51	0	2.41	0.50413	18.865	4.9519
6/16/2018 2:30:00 AM.000	675.6	1.79	0	2.46	0.49548	18.8625	4.51918
6/16/2018 2:35:00 AM.000	668.3	1.49	0	2.56	0.46467	18.8575	2.98953
6/16/2018 2:40:00 AM.000	679.3	1.03	0	2.81	0.48423	18.8525	2.51319
6/16/2018 2:45:00 AM.000	662.7	0.81	0	2.88	0.49536	18.845	2.01617
6/16/2018 2:50:00 AM.000	654.3	1.18	0	2.9	0.45426	18.8425	1.97002
6/16/2018 2:55:00 AM.000	652.9	0.52	0	3	0.49933	18.8375	2.80757
6/16/2018 3:00:00 AM.000	638.9	0.05	0	3.06	0.58164	18.8275	1.13095
6/16/2018 3:05:00 AM.000	377.8	0.03	0	2.87	0.56246	18.8275	1.09365
6/16/2018 3:10:00 AM.000	153.9	0.03	0	2.64	0.62716	18.825	1.21943
6/16/2018 3:15:00 AM.000	78.4	0.03	0	2.51	0.68627	18.825	1.3344
6/16/2018 3:20:00 AM.000	54.1	0.03	0	2.32	0.65954	18.8225	1.28233
6/16/2018 3:25:00 AM.000	39.3	0.03	0	2.1	0.7284	18.82	1.41617
6/16/2018 3:30:00 AM.000	4.6	0.03	0	2.01	0.72994	18.8175	1.41908
6/16/2018 3:35:00 AM.000	196.2	0.03	0	1.91	0.65353	18.8175	1.27049
6/16/2018 3:40:00 AM.000	596	0.03	0	1.65	0.71831	18.815	1.39638
6/16/2018 3:45:00 AM.000	661.5	0.21	0	1.48	0.58243	18.8125	1.13209
6/16/2018 3:50:00 AM.000	661.4	0.96	0	1.35	0.45932	18.8075	4.10906
6/16/2018 3:55:00 AM.000	641.3	1.21	0	1.29	0.549	18.8075	7.50961
6/16/2018 4:00:00 AM.000	638.1	1.58	0	1.4	0.44917	18.805	5.93879
6/16/2018 4:05:00 AM.000	651.9	1.85	0	1.52	0.38137	18.7975	4.44028
6/16/2018 4:10:00 AM.000	652	1.46	0	1.56	0.43276	18.795	3.64941
6/16/2018 4:15:00 AM.000	479.9	0.82	0	1.69	0.43777	18.795	2.35528
6/16/2018 4:20:00 AM.000	189.1	0.31	0	1.88	0.41702	18.79	1.23373
6/16/2018 4:25:00 AM.000	89.5	0.25	0	1.91	0.46098	18.79	2.15571
6/16/2018 4:30:00 AM.000	55.8	0.42	0	1.82	0.48709	18.79	3.01376
6/16/2018 4:35:00 AM.000	47.1	1.05	0	1.89	0.45201	18.7825	5.18823
6/16/2018 4:40:00 AM.000	1.8	1.78	0	1.94	0.43971	18.7825	7.10189
6/16/2018 4:45:00 AM.000	0.8	2.49	0	2.04	0.44017	18.7825	7.84892
6/16/2018 4:50:00 AM.000	261.6	1.79	0	2.19	0.42357	18.7825	3.75216
6/16/2018 4:55:00 AM.000	606.1	1.18	0	2.35	0.41023	18.78	1.71932
6/16/2018 5:00:00 AM.000	651.8	0.75	0	2.46	0.42159	18.7775	1.95066
6/16/2018 5:05:00 AM.000	661.8	1.28	0	2.55	0.40967	18.775	2.3998
6/16/2018 5:10:00 AM.000	654.2	1.93	0	2.72	0.3864	18.77	3.70042
6/16/2018 5:15:00 AM.000	645.4	1.81	0	2.87	0.40155	18.7675	3.72476
6/16/2018 5:20:00 AM.000	648.1	0.78	0	2.96	0.39426	18.7625	0.725272
6/16/2018 5:25:00 AM.000	619.1	0.13	0	3.08	0.44641	18.7575	0.866471
6/16/2018 5:30:00 AM.000	313.9	0.04	0	3.04	0.46502	18.755	0.902557
6/16/2018 5:35:00 AM.000	116.7	0.03	0	2.82	0.47015	18.7575	0.912573
6/16/2018 5:40:00 AM.000	59.8	0.03	0	2.66	0.49232	18.7525	0.955512
6/16/2018 5:45:00 AM.000	50.5	0.03	0	2.46	0.50209	18.755	0.97454
6/16/2018 5:50:00 AM.000	22	0.03	0	2.25	0.47946	18.7525	0.930542
6/16/2018 5:55:00 AM.000	-1.7	0.24	0	2.15	0.40863	18.7525	0.793011
6/16/2018 6:00:00 AM.000	2.4	1.52	0	2.09	0.3558	18.7525	2.98978
6/16/2018 6:05:00 AM.000	-2.7	2.1	0	2.1	0.36467	18.7525	4.21036
6/16/2018 6:10:00 AM.000	13.6	1.53	0	2.19	0.34527	18.755	2.14349
6/16/2018 6:15:00 AM.000	402.2	0.88	0	2.34	0.32898	18.755	1.27041
6/16/2018 6:20:00 AM.000	637	0.87	0	2.41	0.33341	18.755	1.39048
6/16/2018 6:25:00 AM.000	671.3	1.55	0	2.49	0.3229	18.75	2.11812
6/16/2018 6:30:00 AM.000	687.6	1.75	0	2.64	0.30583	18.7475	3.01613
6/16/2018 6:35:00 AM.000	662.8	1.59	0	2.76	0.30952	18.7475	1.78446
6/16/2018 6:40:00 AM.000	644.4	0.9	0	2.82	0.3081	18.745	0.565432
6/16/2018 6:45:00 AM.000	600.7	0.21	0	2.94	0.29918	18.7425	0.580355
6/16/2018 6:50:00 AM.000	277.9	0.04	0	2.94	0.1704	18.74	0.330343
6/16/2018 6:55:00 AM.000	107.6	0.03	0	2.71	0.15027	18.7475	0.291321
6/16/2018 7:00:00 AM.000	64.1	0.03	0	2.54	0.15039	18.7475	0.291554
6/16/2018 7:05:00 AM.000	42.7	0.03	0	2.47	0.00368	18.7475	0.00672148
6/16/2018 7:10:00 AM.000	20.2	0.03	0	2.29	0.00258	18.7525	0.00458647
6/16/2018 7:15:00 AM.000	19.3	0.03	0	2.08	0.00165	18.7525	0.0027807
6/16/2018 7:20:00 AM.000	2.9	0.03	0	1.97	0.00142	18.755	0.00233427
6/16/2018 7:25:00 AM.000	-2.8	0.44	0	1.74	0.00092	18.76	0.00136359
6/16/2018 7:30:00 AM.000	-2.6	2.01	0	1.59	0.00134	18.7625	0.0135218
6/16/2018 7:35:00 AM.000	-2.7	1.81	0	1.71	0.00364	18.76	0.0415661
6/16/2018 7:40:00 AM.000	12.7	1.2	0	1.8	0.00596	18.7625	0.0335198
6/16/2018 7:45:00 AM.000	454.7	1.06	0	1.86	0.00617	18.765	0.0216016
6/16/2018 7:50:00 AM.000	662.3	0.61	0	2.02	0.01176	18.7625	0.0463778
6/16/2018 7:55:00 AM.000	665.3	1.07	0	2.12	0.02949	18.76	0.201801
6/16/2018 8:00:00 AM.000	684	2.06	0	2.11	0.0182	18.76	0.170942
6/16/2018 8:05:00 AM.000	660	2.16	0	2.23	0.02398	18.76	0.203358
6/16/2018 8:10:00 AM.000	651.4	1.76	0	2.38	0.02867	18.7575	0.147841
6/16/2018 8:15:00 AM.000	427.2	2.02	0	2.44	0.02228	18.76	0.136618
6/16/2018 8:20:00 AM.000	155.1	2.44	0	2.56	0.01997	18.7625	0.102015
6/16/2018 8:25:00 AM.000	84.3	2.23	0	2.6	0.02485	18.76	0.162921
6/16/2018 8:30:00 AM.000	61	1.7	0	2.62	0.02347	18.7625	0.124787
6/16/2018 8:35:00 AM.000	22.9	1.25	0	2.67	0.01978	18.765	0.037995
6/16/2018 8:40:00 AM.000	0.6	0.33	0	2.73	0.02296	18.7675	0.0441741
6/16/2018 8:45:00 AM.000	-2.6	0.07	0	2.73	0.01791	18.7675	0.034365
6/16/2018 8:50:00 AM.000	-2.7	0.04	0	2.68	0.00417	18.7675	0.00767667
6/16/2018 8:55:00 AM.000	-2.8	0.03	0	2.62	0.00134	18.7675	0.00217972
6/16/2018 9:00:00 AM.000	-2.6	0.4	0	2.44	0.00048	18.77	0.0005021
6/16/2018 9:05:00 AM.000	-2.8	1.43	0	2.32	0.00119	18.775	0.00866086
6/16/2018 9:10:00 AM.000	57.2	2.37	0	2.35	0.00174	18.7775	0.0148861
6/16/2018 9:15:00 AM.000	534.5	2.23	0	2.38	0.0032	18.7775	0.0296416
6/16/2018 9:20:00 AM.000	661.4	2.5	0	2.43	0.00458	18.7775	0.018537
6/16/2018 9:25:00 AM.000	681	2.44	0	2.56	0.00585	18.7775	0.019621
6/16/2018 9:30:00 AM.000	676.6	2.06	0	2.61	0.00699	18.7775	0.00548423
6/16/2018 9:35:00 AM.000	667.2	1.45	0	2.6	0.00807	18.7775	0.0152557
6/16/2018 9:40:00 AM.000	676.6	1	0	2.65	0.01089	18.775	0.0207333
6/16/2018 9:45:00 AM.000	548.1	0.39	0	2.64	0.00993	18.775	0.0188683
6/16/2018 9:50:00 AM.000	206.9	0.05	0	2.61	0.00434	18.7725	0.00502018
6/16/2018 9:55:00 AM.000	93.8	0.03	0	2.5	0.00092	18.7725	0.00136414
6/16/2018 10:00:00 AM.000	51.4	0.03	0	2.38	0.00058	18.775	0.000703725
6/16/2018 10:05:00 AM.000	42	0.03	0	2.25	0.00051	18.7725	0.000567671
6/16/2018 10:10:00 AM.000	42.8	0.03	0	2.15	0.00049	18.7725	0.000528818
6/16/2018 10:15:00 AM.000	-0.9	0.03	0	2.03	0.00028	18.775	0.000120906
6/16/2018 10:20:00 AM.000	154.4	0.68	0	1.82	0	18.7775	0
6/16/2018 10:25:00 AM.000	587.3	1.89	0	1.79	0	18.78	0
6/16/2018 10:30:00 AM.000	666	1.1	0	1.85	0.00348	18.7825	0.0323746
6/16/2018 10:35:00 AM.000	668.9	0.51	0	1.88	0.0072	18.78	0.0397646
6/16/2018 10:40:00 AM.000	657.4	1.28	0	1.84	0.01047	18.7825	0.097602
6/16/2018 10:45:00 AM.000	663	1.78	0	1.99	0.02725	18.785	0.39735
6/16/2018 10:50:00 AM.000	667.7	1.24	0	2.11	0.03811	18.79	0.319907
6/16/2018 10:55:00 AM.000	526.4	0.41	0	2.16	0.05304	18.7925	0.277935
6/16/2018 11:00:00 AM.000	191.3	0.53	0	2.17	0.13944	18.7975	0.856294
6/16/2018 11:05:00 AM.000	97.8	1.05	0	2.28	0.10303	18.8025	1.26593
6/16/2018 11:10:00 AM.000	65.5	1.97	0	2.29	0.09252	18.8125	1.55701
6/16/2018 11:15:00 AM.000	45.4	2.12	0	2.43	0.11722	18.8175	1.54733
6/16/2018 11:20:00 AM.000	246.3	1.15	0	2.64	0.12732	18.8225	0.76122
6/16/2018 11:25:00 AM.000	618.5	0.78	0	2.71	0.1123	18.8275	0.671377
6/16/2018 11:30:00 AM.000	671	0.7	0	2.82	0.13576	18.835	0.596156
6/16/2018 11:35:00 AM.000	664.9	0.95	0	2.94	0.17634	18.8375	1.01151
6/16/2018 11:40:00 AM.000	680.4	1.57	0	2.97	0.15324	18.8475	1.34318
6/16/2018 11:45:00 AM.000	671	1.92	0	3.03	0.14537	18.8525	1.56708
6/16/2018 11:50:00 AM.000	669.6	1.52	0	3.19	0.16755	18.855	1.16988
6/16/2018 11:55:00 AM.000	654	1.58	0	3.32	0.15814	18.8625	1.02616
6/16/2018 12:00:00 PM.000	655.9	1.89	0	3.47	0.13964	18.87	0.942533
6/16/2018 12:05:00 PM.000	591.7	1.85	0	3.67	0.15201	18.8725	0.677451
6/16/2018 12:10:00 PM.000	254.1	0.97	0	3.76	0.1576	18.8775	0.512877
6/16/2018 12:15:00 PM.000	106	0.32	0	3.78	0.1501	18.8825	0.291925
6/16/2018 12:20:00 PM.000	109.8	0.04	0	3.8	0.1565	18.8875	0.304427
6/16/2018 12:25:00 PM.000	485.7	0.03	0	3.72	0.16836	18.8925	0.327568
6/16/2018 12:30:00 PM.000	665.3	0.03	0	3.59	0.03199	18.8925	0.0618985
6/16/2018 12:35:00 PM.000	676.7	0.03	0	3.43	0.00271	18.8975	0.00485728
6/16/2018 12:40:00 PM.000	669.1	0.03	0	3.05	0.00163	18.9025	0.00275341
6/16/2018 12:45:00 PM.000	667.6	0.56	0	2.79	0	18.905	0
6/16/2018 12:50:00 PM.000	654.7	1.46	0	2.69	0.00291	18.91	0.0363365
6/16/2018 12:55:00 PM.000	641.1	1.57	0	2.7	0.00955	18.915	0.110247
6/16/2018 1:00:00 PM.000	645	0.99	0	2.78	0.01892	18.9175	0.203535
6/16/2018 1:05:00 PM.000	645.8	0.58	0	2.83	0.05368	18.915	0.282197
6/16/2018 1:10:00 PM.000	639.1	0.35	0	2.81	0.0811	18.9225	0.45522
6/16/2018 1:15:00 PM.000	624.1	0.85	0	2.75	0.07406	18.9225	0.670501
6/16/2018 1:20:00 PM.000	634.1	1.59	0	2.83	0.09861	18.9225	1.58902
6/16/2018 1:25:00 PM.000	641.3	2.26	0	3.02	0.11443	18.93	2.14229
6/16/2018 1:30:00 PM.000	635.7	1.59	0	3.09	0.11388	18.935	1.22771
6/16/2018 1:35:00 PM.000	627.2	0.97	0	3.18	0.12534	18.9375	0.674551
6/16/2018 1:40:00 PM.000	639.3	0.61	0	3.3	0.16685	18.9425	0.862441
6/16/2018 1:45:00 PM.000	641.9	1.09	0	3.28	0.172	18.9475	1.42721
6/16/2018 1:50:00 PM.000	631.5	1.95	0	3.3	0.16394	18.9475	1.93
6/16/2018 1:55:00 PM.000	608	1.68	0	3.49	0.18646	18.9475	2.44431
6/16/2018 2:00:00 PM.000	612.1	0.87	0	3.65	0.19124	18.9475	1.26821
6/16/2018 2:05:00 PM.000	606.4	0.1	0	3.68	0.21704	18.95	0.0329582
6/16/2018 2:10:00 PM.000	614.4	0.04	0	3.66	0.29858	18.9525	0.582085
6/16/2018 2:15:00 PM.000	609.7	0.03	0	3.47	0.32648	18.955	0.636553
6/16/2018 2:20:00 PM.000	620.5	0.03	0	3.16	0.33859	18.96	0.660259
6/16/2018 2:25:00 PM.000	636.4	0.03	0	3.02	0.35231	18.9575	0.68699
6/16/2018 2:30:00 PM.000	620.3	0.03	0	2.77	0.33357	18.9675	0.650579
6/16/2018 2:35:00 PM.000	602.2	0.06	0	2.46	0.22088	18.97	0.430677
6/16/2018 2:40:00 PM.000	607.1	1.04	0	2.23	0.17144	18.97	1.1747
6/16/2018 2:45:00 PM.000	600.8	1.79	0	2.13	0.16249	18.975	2.97859
6/16/2018 2:50:00 PM.000	594.3	1.5	0	2.17	0.10817	18.98	1.70247
6/16/2018 2:55:00 PM.000	586.3	0.99	0	2.27	0.12592	18.985	0.933611
6/16/2018 3:00:00 PM.000	606	0.5	0	2.33	0.18074	18.9875	1.3412
6/16/2018 3:05:00 PM.000	614.9	1.04	0	2.33	0.18046	18.9875	2.59991
6/16/2018 3:10:00 PM.000	613.8	1.75	0	2.31	0.15371	18.995	2.92966
6/16/2018 3:15:00 PM.000	608	2.67	0	2.41	0.16202	18.9975	3.36867
6/16/2018 3:20:00 PM.000	612.2	1.82	0	2.59	0.19094	19	2.21303
6/16/2018 3:25:00 PM.000	617.8	0.8	0	2.78	0.19527	19	1.04784
6/16/2018 3:30:00 PM.000	611.2	0.7	0	2.88	0.20818	19	1.15012
6/16/2018 3:35:00 PM.000	602.3	1.18	0	2.97	0.24431	19	2.13527
6/16/2018 3:40:00 PM.000	610.5	1.68	0	3.08	0.25889	18.9975	3.55317
6/16/2018 3:45:00 PM.000	610.7	2.01	0	3.16	0.24515	19.0025	2.87815
6/16/2018 3:50:00 PM.000	611.5	1.55	0	3.27	0.248	19.0025	2.08453
6/16/2018 3:55:00 PM.000	595.1	0.95	0	3.44	0.27276	19.0025	1.51234
6/16/2018 4:00:00 PM.000	589.4	1.31	0	3.52	0.27603	19.0025	2.22931
6/16/2018 4:05:00 PM.000	590.8	1.19	0	3.58	0.27483	19.005	2.96804
6/16/2018 4:10:00 PM.000	596.5	0.11	0	3.69	0.35401	19.0075	0.402445
6/16/2018 4:15:00 PM.000	592.1	0.04	0	3.62	0.41865	19.0075	0.817399
6/16/2018 4:20:00 PM.000	587.2	0.03	0	3.36	0.42754	19.0125	0.834864
6/16/2018 4:25:00 PM.000	593.1	0.03	0	3.14	0.48769	19.01	0.952323
6/16/2018 4:30:00 PM.000	605.8	0.03	0	2.95	0.50312	19.005	0.98235
6/16/2018 4:35:00 PM.000	589.8	0.05	0	2.6	0.50048	19.01	0.977309
6/16/2018 4:40:00 PM.000	595.4	0.57	0	2.37	0.51704	19.01	2.59408
6/16/2018 4:45:00 PM.000	611.3	1.15	0	2.35	0.47867	19.0025	7.10978
6/16/2018 4:50:00 PM.000	604	1.29	0	2.33	0.43983	19.005	6.5844
6/16/2018 4:55:00 PM.000	592.4	1.54	0	2.36	0.46155	19.005	6.6894
6/16/2018 5:00:00 PM.000	607.9	1.83	0	2.48	0.43809	19.0025	7.07909
6/16/2018 5:05:00 PM.000	631.8	1.64	0	2.61	0.42334	18.9975	5.43838
6/16/2018 5:10:00 PM.000	622.7	0.6	0	2.71	0.46524	19	3.20873
6/16/2018 5:15:00 PM.000	602.8	0.53	0	2.74	0.52184	18.995	3.56835
6/16/2018 5:20:00 PM.000	600.5	0.87	0	2.73	0.50438	18.995	7.33878
6/16/2018 5:25:00 PM.000	596.2	1.77	0	2.7	0.46234	18.9925	9.1313
6/16/2018 5:30:00 PM.000	587.2	2.81	0	2.85	0.46193	18.99	9.78854
6/16/2018 5:35:00 PM.000	584.8	1.9	0	3.08	0.49249	18.985	5.36676
6/16/2018 5:40:00 PM.000	583.2	1.05	0	3.21	0.47886	18.985	2.35615
6/16/2018 5:45:00 PM.000	595.4	0.76	0	3.29	0.48226	18.9775	2.93037
6/16/2018 5:50:00 PM.000	594.5	1.16	0	3.42	0.52862	18.975	4.66458
6/16/2018 5:55:00 PM.000	589.4	1.85	0	3.5	0.51888	18.9725	6.29336
6/16/2018 6:00:00 PM.000	601.9	1.74	0	3.54	0.4935	18.97	4.8184
6/16/2018 6:05:00 PM.000	610.5	1.11	0	3.7	0.51262	18.965	2.59324
6/16/2018 6:10:00 PM.000	615.2	0.72	0	3.89	0.54376	18.9625	2.51271
6/16/2018 6:15:00 PM.000	606.9	1.49	0	3.86	0.50889	18.9575	3.72577
6/16/2018 6:20:00 PM.000	596.3	2.2	0	3.93	0.49508	18.9525	5.81396
6/16/2018 6:25:00 PM.000	597.5	1.09	0	4.1	0.53887	18.9425	3.91557
6/16/2018 6:30:00 PM.000	592.7	0.18	0	4.17	0.56325	18.9375	0.0372236
6/16/2018 6:35:00 PM.000	581.5	0.04	0	4.1	0.61966	18.93	1.20784
6/16/2018 6:40:00 PM.000	587.8	0.03	0	3.92	0.68351	18.9325	1.33242
6/16/2018 6:45:00 PM.000	598	0.03	0	3.69	0.70626	18.92	1.37638
6/16/2018 6:50:00 PM.000	589.5	0.03	0	3.51	0.72268	18.9125	1.40814
6/16/2018 6:55:00 PM.000	579.5	0.03	0	3.24	0.76543	18.9125	1.49146
6/16/2018 7:00:00 PM.000	581	0.03	0	2.99	0.75251	18.905	1.46602
6/16/2018 7:05:00 PM.000	580.8	0.18	0	2.75	0.70853	18.8975	1.38006
6/16/2018 7:10:00 PM.000	559.5	1.15	0	2.55	0.70633	18.895	7.21869
6/16/2018 7:15:00 PM.000	381.1	1.85	0	2.51	0.6504	18.885	9.12209
6/16/2018 7:20:00 PM.000	550.4	1.85	0	2.65	0.58898	18.8825	7.36044
6/16/2018 7:25:00 PM.000	634.1	0.62	0	2.73	0.63807	18.8825	3.24216
6/16/2018 7:30:00 PM.000	635.2	0.43	0	2.73	0.67209	18.875	4.53198
6/16/2018 7:35:00 PM.000	606.3	1.07	0	2.75	0.60552	18.8625	9.03699
6/16/2018 7:40:00 PM.000	615.9	1.6	0	2.78	0.59432	18.86	9.72055
6/16/2018 7:45:00 PM.000	610.7	1.91	0	2.86	0.59504	18.855	9.68253
6/16/2018 7:50:00 PM.000	603.5	1.96	0	2.96	0.56726	18.8525	7.37598
6/16/2018 7:55:00 PM.000	588.1	1.68	0	3.06	0.54769	18.845	6.60704
6/16/2018 8:00:00 PM.000	573.5	1.38	0	3.28	0.58209	18.8375	5.95901
6/16/2018 8:05:00 PM.000	351.7	1.79	0	3.42	0.5711	18.8325	7.91205
6/16/2018 8:10:00 PM.000	138.4	2.88	0	3.48	0.51379	18.83	9.03152
6/16/2018 8:15:00 PM.000	75.7	2	0	3.65	0.52914	18.83	4.03936
6/16/2018 8:20:00 PM.000	51.4	1.3	0	3.88	0.55983	18.83	3.20365
6/16/2018 8:25:00 PM.000	194.1	0.87	0	3.98	0.52637	18.8275	2.33166
6/16/2018 8:30:00 PM.000	585	0.86	0	4.09	0.54948	18.825	2.50539
6/16/2018 8:35:00 PM.000	664.9	1.25	0	4.2	0.5966	18.815	4.29891
6/16/2018 8:40:00 PM.000	666.5	1.55	0	4.25	0.56364	18.805	4.41086
6/16/2018 8:45:00 PM.000	667.2	1.93	0	4.3	0.52709	18.8025	4.67924
6/16/2018 8:50:00 PM.000	661.5	1.52	0	4.44	0.56166	18.7925	4.67497
6/16/2018 8:55:00 PM.000	640.2	1.21	0	4.56	0.5484	18.7875	3.46077
6/16/2018 9:00:00 PM.000	642.2	0.27	0	4.6	0.54273	18.775	0.897029
6/16/2018 9:05:00 PM.000	645.3	0.06	0	4.68	0.68398	18.765	1.32805
6/16/2018 9:10:00 PM.000	651.8	0.04	0	4.52	0.70242	18.7675	1.36395
6/16/2018 9:15:00 PM.000	643.8	0.03	0	4.21	0.71893	18.76	1.39577
6/16/2018 9:20:00 PM.000	631	0.03	0	4.05	0.79597	18.75	1.54502
6/16/2018 9:25:00 PM.000	632.4	0.03	0	3.84	0.81176	18.745	1.57549
6/16/2018 9:30:00 PM.000	626.9	0.03	0	3.54	0.7995	18.74	1.5515
6/16/2018 9:35:00 PM.000	624.4	0.03	0	3.34	0.81279	18.73	1.57692
6/16/2018 9:40:00 PM.000	715	0.03	0	3.12	0.79516	18.725	1.54253
6/16/2018 9:45:00 PM.000	1301.2	0.03	0	2.76	0.712	18.7175	1.38092
6/16/2018 9:50:00 PM.000	748.4	0.03	0	2.55	0.48694	18.695	0.943777
6/16/2018 9:55:00 PM.000	818.3	0.33	0	2.26	0.44275	18.695	0.85809
6/16/2018 10:00:00 PM.000	848.1	1.53	0	1.9	0.3979	18.695	3.80073
6/16/2018 10:05:00 PM.000	942.8	0.84	0	2	0.21793	18.6675	2.96038
6/16/2018 10:10:00 PM.000	726.8	0.67	0	2.03	0.17346	18.665	1.8765
6/16/2018 10:15:00 PM.000	906.2	0.67	0	1.91	0.33856	18.6625	4.38422
6/16/2018 10:20:00 PM.000	902.7	0.82	0	1.87	0.25663	18.64	3.91773
6/16/2018 10:25:00 PM.000	1131.4	1.21	0	2.03	0.1826	18.6325	3.2674
6/16/2018 10:30:00 PM.000	1153.9	1.51	0	1.95	0.2353	18.62	4.92825
6/16/2018 10:35:00 PM.000	1304.7	2.1	0	1.94	0.25941	18.6175	4.53524
6/16/2018 10:40:00 PM.000	1366.6	2.23	0	2.16	0.20018	18.6075	2.30615
6/16/2018 10:45:00 PM.000	1470.9	1.65	0	2.35	0.22485	18.5875	3.2226
6/16/2018 10:50:00 PM.000	1519.8	0.99	0	2.45	0.30827	18.58	3.01522
6/16/2018 10:55:00 PM.000	1518.1	1.18	0	2.55	0.2665	18.5625	2.40084
6/16/2018 11:00:00 PM.000	1703.6	1.62	0	2.68	0.27341	18.5475	3.0995
6/16/2018 11:05:00 PM.000	1608.7	1.25	0	2.76	0.34442	18.53	3.93641
6/16/2018 11:10:00 PM.000	1550.7	0.93	0	2.84	0.33869	18.515	3.03649
6/16/2018 11:15:00 PM.000	1373.4	0.95	0	2.87	0.34428	18.4975	2.9616
6/16/2018 11:20:00 PM.000	740.6	1.51	0	2.91	0.38362	18.48	3.98698
6/16/2018 11:25:00 PM.000	680.8	1.7	0	2.99	0.38848	18.4775	4.99717
6/16/2018 11:30:00 PM.000	1273.3	1.3	0	3.1	0.37901	18.4775	3.95875
6/16/2018 11:35:00 PM.000	1124.1	1.11	0	3.21	0.41853	18.4575	4.04562
6/16/2018 11:40:00 PM.000	644.1	1.05	0	3.29	0.44613	18.435	4.68443
6/16/2018 11:45:00 PM.000	552.5	1.04	0	3.33	0.44591	18.4425	4.28777
6/16/2018 11:50:00 PM.000	538.7	1.55	0	3.43	0.46315	18.4425	4.54872
6/16/2018 11:55:00 PM.000	570.2	1.82	0	3.54	0.48691	18.425	5.92832
6/17/2018 12:00:00 AM.000	1166.5	0.91	0	3.57	0.49381	18.4175	4.64261
6/17/2018 12:05:00 AM.000	1269.4	0.1	0	3.66	0.57987	18.41	0.105605
6/17/2018 12:10:00 AM.000	689.8	0.04	0	3.6	0.64296	18.385	1.23717
6/17/2018 12:15:00 AM.000	541.9	0.04	0	3.28	0.64591	18.38	1.2427
6/17/2018 12:20:00 AM.000	527.2	0.03	0	3.05	0.67884	18.3825	1.30616
6/17/2018 12:25:00 AM.000	530.9	0.03	0	2.88	0.68036	18.3675	1.30862
6/17/2018 12:30:00 AM.000	529.6	0.03	0	2.54	0.69251	18.3625	1.33184
6/17/2018 12:35:00 AM.000	524.4	0.16	0	2.26	0.69799	18.36	1.3423
6/17/2018 12:40:00 AM.000	673.9	0.93	0	2.15	0.64369	18.355	6.06893
6/17/2018 12:45:00 AM.000	1306.2	1.31	0	2.1	0.63015	18.345	9.8892
6/17/2018 12:50:00 AM.000	924.2	1.15	0	2.07	0.63706	18.33	10.1459
6/17/2018 12:55:00 AM.000	581.5	1.45	0	2.15	0.58764	18.325	11.4525
6/17/2018 1:00:00 AM.000	532.5	2.46	0	2.2	0.52894	18.3325	12.0631
6/17/2018 1:05:00 AM.000	530	1.92	0	2.37	0.56862	18.325	8.96643
6/17/2018 1:10:00 AM.000	528.6	0.73	0	2.58	0.60948	18.315	2.87679
6/17/2018 1:15:00 AM.000	534.5	0.32	0	2.57	0.62496	18.3175	2.89606
6/17/2018 1:20:00 AM.000	865.1	0.53	0	2.44	0.64207	18.31	6.56654
6/17/2018 1:25:00 AM.000	1241.9	0.85	0	2.46	0.67349	18.2975	9.76585
6/17/2018 1:30:00 AM.000	688.7	0.91	0	2.47	0.66745	18.2825	11.7981
6/17/2018 1:35:00 AM.000	533.7	1.57	0	2.38	0.61764	18.2875	11.2815
6/17/2018 1:40:00 AM.000	515.4	2.32	0	2.45	0.59812	18.285	10.3376
6/17/2018 1:45:00 AM.000	515.5	2.35	0	2.68	0.60678	18.275	7.39224
6/17/2018 1:50:00 AM.000	517.1	1.75	0	2.77	0.60892	18.2775	6.85009
6/17/2018 1:55:00 AM.000	516.7	1.65	0	2.84	0.57924	18.28	7.7663
6/17/2018 2:00:00 AM.000	507	1.85	0	3.05	0.59632	18.2725	7.74807
6/17/2018 2:05:00 AM.000	515.7	2.08	0	3.28	0.60401	18.2625	8.04089
6/17/2018 2:10:00 AM.000	530	1.62	0	3.29	0.57868	18.2675	5.44562
6/17/2018 2:15:00 AM.000	527.9	1.2	0	3.43	0.59348	18.2625	3.33072
6/17/2018 2:20:00 AM.000	523.4	0.84	0	3.63	0.65693	18.2525	2.8999
6/17/2018 2:25:00 AM.000	528.1	0.85	0	3.65	0.66116	18.25	3.25293
6/17/2018 2:30:00 AM.000	525.6	1.2	0	3.65	0.68136	18.25	6.17442
6/17/2018 2:35:00 AM.000	512.2	1.94	0	3.8	0.69336	18.2425	8.74252
6/17/2018 2:40:00 AM.000	509.6	2.55	0	3.89	0.66031	18.2375	10.3827
6/17/2018 2:45:00 AM.000	519.1	1.91	0	3.96	0.67086	18.2325	6.61306
6/17/2018 2:50:00 AM.000	513	1.56	0	4.14	0.67231	18.2225	3.58009
6/17/2018 2:55:00 AM.000	507.5	0.95	0	4.32	0.69405	18.22	2.64268
6/17/2018 3:00:00 AM.000	508.7	0.87	0	4.36	0.72725	18.2175	3.17361
6/17/2018 3:05:00 AM.000	525.1	1.49	0	4.47	0.73343	18.2125	6.28004
6/17/2018 3:10:00 AM.000	520.9	2.39	0	4.58	0.72013	18.2075	8.89899
6/17/2018 3:15:00 AM.000	513.9	1.96	0	4.64	0.72878	18.2075	7.13174
6/17/2018 3:20:00 AM.000	505.1	1.4	0	4.76	0.72855	18.205	3.05504
6/17/2018 3:25:00 AM.000	507.2	0.92	0	4.92	0.75693	18.1975	3.46969
6/17/2018 3:30:00 AM.000	507.2	0.91	0	4.99	0.8341	18.195	4.55113
6/17/2018 3:35:00 AM.000	510.4	0.9	0	5	0.85472	18.19	5.41219
6/17/2018 3:40:00 AM.000	493.7	1.04	0	5.01	0.85509	18.185	6.37271
6/17/2018 3:45:00 AM.000	491.5	1.3	0	5.1	0.92865	18.18	10.3645
6/17/2018 3:50:00 AM.000	362.1	1.64	0	5.14	0.94358	18.18	12.784
6/17/2018 3:55:00 AM.000	137.5	2.02	0	5.14	0.89241	18.175	12.4784
6/17/2018 4:00:00 AM.000	63.3	2.43	0	5.23	0.88215	18.1775	9.72114
6/17/2018 4:05:00 AM.000	43.7	1.55	0	5.4	0.94681	18.18	4.55017
6/17/2018 4:10:00 AM.000	5.1	0.97	0	5.5	0.94312	18.18	4.32308
6/17/2018 4:15:00 AM.000	-2.6	1.27	0	5.55	0.91703	18.18	5.30235
6/17/2018 4:20:00 AM.000	-2.7	1.77	0	5.64	0.95891	18.1775	8.12556
6/17/2018 4:25:00 AM.000	225	1.78	0	5.75	0.96413	18.1775	9.18987
6/17/2018 4:30:00 AM.000	568.7	1.27	0	5.82	0.94218	18.1775	6.10081
6/17/2018 4:35:00 AM.000	599	0.77	0	5.91	1.10383	18.1675	4.48683
6/17/2018 4:40:00 AM.000	592	1	0	5.99	1.05611	18.17	5.97625
6/17/2018 4:45:00 AM.000	585.6	1.53	0	5.97	0.98035	18.1675	7.43521
6/17/2018 4:50:00 AM.000	577.1	1.71	0	6.07	1.03458	18.16	6.79359
6/17/2018 4:55:00 AM.000	558.7	1.56	0	6.21	1.12106	18.1575	6.22203
6/17/2018 5:00:00 AM.000	553.3	1.74	0	6.2	0.9731	18.155	6.67854
6/17/2018 5:05:00 AM.000	562.2	2.28	0	6.33	0.96076	18.15	9.3648
6/17/2018 5:10:00 AM.000	570.1	1.58	0	6.6	1.07935	18.1425	7.5434
6/17/2018 5:15:00 AM.000	560	1.52	0	6.65	1.0026	18.14	4.91754
6/17/2018 5:20:00 AM.000	554	2.01	0	6.66	0.92625	18.14	4.67111
6/17/2018 5:25:00 AM.000	473.5	1.61	0	6.84	1.03606	18.13	5.56583
6/17/2018 5:30:00 AM.000	195.8	1.49	0	6.97	1.01253	18.13	5.13153
6/17/2018 5:35:00 AM.000	80.7	1.96	0	6.97	0.91068	18.13	4.48228
6/17/2018 5:40:00 AM.000	47.8	1.93	0	7.16	0.97697	18.13	4.88722
6/17/2018 5:45:00 AM.000	3.6	1.79	0	7.32	0.9895	18.13	5.83114
6/17/2018 5:50:00 AM.000	-2.5	1.44	0	7.34	0.92625	18.1275	3.16325
6/17/2018 5:55:00 AM.000	-2.8	0.77	0	7.47	0.97496	18.1275	1.8648
6/17/2018 6:00:00 AM.000	-2.5	0.1	0	7.64	1.04706	18.125	2.00261
6/17/2018 6:05:00 AM.000	-2.8	0.04	0	7.56	1.04112	18.1275	1.99137
6/17/2018 6:10:00 AM.000	-2.5	0.04	0	7.48	1.12722	18.13	2.15622
6/17/2018 6:15:00 AM.000	11.8	0.04	0	7.46	1.22986	18.1275	2.35245
6/17/2018 6:20:00 AM.000	423.6	0.04	0	7.31	1.23208	18.13	2.35684
6/17/2018 6:25:00 AM.000	638.3	0.03	0	7.18	1.29217	18.1275	2.47166
6/17/2018 6:30:00 AM.000	670.5	0.03	0	7.07	1.37885	18.12	2.63702
6/17/2018 6:35:00 AM.000	652.2	0.03	0	6.82	1.38481	18.115	2.6481
6/17/2018 6:40:00 AM.000	473.3	0.03	0	6.64	1.44157	18.1125	2.7565
6/17/2018 6:45:00 AM.000	175.8	0.03	0	6.51	1.53009	18.1125	2.92579
6/17/2018 6:50:00 AM.000	80.4	0.03	0	6.29	1.56347	18.1125	2.98963
6/17/2018 6:55:00 AM.000	39.4	0.03	0	6.12	1.60884	18.115	3.07658
6/17/2018 7:00:00 AM.000	-2.6	0.4	0	6.02	1.61405	18.115	2.05077
6/17/2018 7:05:00 AM.000	-2.7	1.33	0	5.87	1.56078	18.115	13.8614
6/17/2018 7:10:00 AM.000	-2.5	1.7	0	5.9	1.48441	18.1125	14.5699
6/17/2018 7:15:00 AM.000	-2.7	1.7	0	6.04	1.48122	18.115	12.688
6/17/2018 7:20:00 AM.000	-2.1	1.17	0	6.15	1.45772	18.115	8.62752
6/17/2018 7:25:00 AM.000	296	0.96	0	6.19	1.42197	18.115	5.08181
6/17/2018 7:30:00 AM.000	634.3	0.73	0	6.32	1.43576	18.115	6.38498
6/17/2018 7:35:00 AM.000	665.3	1.11	0	6.38	1.42222	18.11	7.57542
6/17/2018 7:40:00 AM.000	673	1.33	0	6.4	1.36818	18.105	7.75576
6/17/2018 7:45:00 AM.000	670.3	1.44	0	6.47	1.35021	18.1	7.2276
6/17/2018 7:50:00 AM.000	670.1	1.54	0	6.64	1.32764	18.1	9.27618
6/17/2018 7:55:00 AM.000	629.4	1.86	0	6.71	1.29144	18.0925	9.00465
6/17/2018 8:00:00 AM.000	613.4	1.85	0	6.83	1.27584	18.09	5.86812
6/17/2018 8:05:00 AM.000	609.4	1.4	0	6.93	1.27816	18.0825	2.68628
6/17/2018 8:10:00 AM.000	617	1.19	0	7.04	1.26882	18.0825	3.10127
6/17/2018 8:15:00 AM.000	611.9	1.25	0	7.14	1.24256	18.08	4.8946
6/17/2018 8:20:00 AM.000	628.2	1.3	0	7.23	1.23491	18.0775	5.71218
6/17/2018 8:25:00 AM.000	648.6	1.41	0	7.33	1.21394	18.075	5.82383
6/17/2018 8:30:00 AM.000	631.3	1.51	0	7.39	1.19263	18.0725	5.36813
6/17/2018 8:35:00 AM.000	623.1	1.51	0	7.47	1.18054	18.0725	5.32632
6/17/2018 8:40:00 AM.000	612.2	1.26	0	7.54	1.18276	18.0675	5.66589
6/17/2018 8:45:00 AM.000	615	0.44	0	7.62	1.18399	18.07	0.296802
6/17/2018 8:50:00 AM.000	622.3	0.06	0	7.63	1.16842	18.065	2.2316
6/17/2018 8:55:00 AM.000	613.1	0.04	0	7.49	1.17733	18.0625	2.24849
6/17/2018 9:00:00 AM.000	622.5	0.03	0	7.28	1.14286	18.06	2.18251
6/17/2018 9:05:00 AM.000	636.5	0.03	0	7.09	0.94977	18.06	1.8137
6/17/2018 9:10:00 AM.000	641.1	0.03	0	6.87	0.88397	18.0625	1.68812
6/17/2018 9:15:00 AM.000	639.1	0.03	0	6.6	0.72007	18.0625	1.37504
6/17/2018 9:20:00 AM.000	646.6	0.03	0	6.43	0.42967	18.06	0.820273
6/17/2018 9:25:00 AM.000	830.7	0.03	0	6.17	0.31678	18.06	0.604646
6/17/2018 9:30:00 AM.000	1511.5	0.03	0	5.87	0.13883	18.0525	0.264703
6/17/2018 9:35:00 AM.000	1164.7	0.03	0	5.64	0.01104	18.0375	0.0206515
6/17/2018 9:40:00 AM.000	667.6	0.03	0	5.29	0.006	18.035	0.0110292
6/17/2018 9:45:00 AM.000	646.6	0.03	0	4.8	0.00524	18.04	0.00957959
6/17/2018 9:50:00 AM.000	1098.7	0.03	0	4.65	0.00187	18.03	0.00314486
6/17/2018 9:55:00 AM.000	717.1	0.04	0	4.48	0.00237	18.02	0.00409812
6/17/2018 10:00:00 AM.000	884.9	0.58	0	3.98	0	18.0225	0
6/17/2018 10:05:00 AM.000	1273.4	1.56	0	3.65	0	18.0225	0
6/17/2018 10:10:00 AM.000	1074.9	1.32	0	3.81	0	18.005	0
6/17/2018 10:15:00 AM.000	1452.6	0.68	0	3.79	0	17.9975	0
6/17/2018 10:20:00 AM.000	1533.5	0.3	0	3.61	0	17.99	0
6/17/2018 10:25:00 AM.000	1514.1	0.39	0	3.66	0.00995	17.9775	0.143556
6/17/2018 10:30:00 AM.000	1238.4	1.35	0	3.56	0	17.97	0
6/17/2018 10:35:00 AM.000	644.7	2.06	0	3.44	0	17.97	0
6/17/2018 10:40:00 AM.000	528.5	1.97	0	3.69	0	17.9725	0
6/17/2018 10:45:00 AM.000	522.4	1.14	0	3.9	0	17.975	0
6/17/2018 10:50:00 AM.000	518.6	1	0	3.81	0	17.9775	0
6/17/2018 10:55:00 AM.000	506.4	0.53	0	3.91	0	17.98	0
6/17/2018 11:00:00 AM.000	514.4	0.85	0	4.04	0	17.9825	0
6/17/2018 11:05:00 AM.000	527.8	1.61	0	3.97	0	17.9875	0
6/17/2018 11:10:00 AM.000	523.2	1.84	0	4.04	0	17.9875	0
6/17/2018 11:15:00 AM.000	513.2	1.23	0	4.28	0	17.9925	0
6/17/2018 11:20:00 AM.000	510.8	0.92	0	4.34	0	17.9975	0
6/17/2018 11:25:00 AM.000	916.5	0.61	0	4.36	0	18	0
6/17/2018 11:30:00 AM.000	1441.8	0.93	0	4.47	0	18	0
6/17/2018 11:35:00 AM.000	1442.8	1.66	0	4.53	0	17.9925	0
6/17/2018 11:40:00 AM.000	819.2	1.57	0	4.55	0	17.995	0
6/17/2018 11:45:00 AM.000	570.5	1.06	0	4.71	0	18.0025	0
6/17/2018 11:50:00 AM.000	521.8	0.95	0	4.83	0	18.01	0
6/17/2018 11:55:00 AM.000	507.1	0.91	0	4.86	0	18.015	0
6/17/2018 12:00:00 PM.000	514.1	0.97	0	4.95	0	18.025	0
6/17/2018 12:05:00 PM.000	520.3	1.34	0	5.06	0.11833	18.035	0.957632
6/17/2018 12:10:00 PM.000	517.8	1.68	0	5.07	0.14779	18.0375	1.48076
6/17/2018 12:15:00 PM.000	514.3	1.85	0	5.1	0.16413	18.0475	1.78316
6/17/2018 12:20:00 PM.000	519.3	1.39	0	5.23	0.16835	18.0575	1.35762
6/17/2018 12:25:00 PM.000	526.9	0.88	0	5.33	0.2272	18.065	0.840013
6/17/2018 12:30:00 PM.000	617.1	0.74	0	5.34	0.48544	18.07	2.25551
6/17/2018 12:35:00 PM.000	662.1	1	0	5.32	0.67306	18.0775	5.06554
6/17/2018 12:40:00 PM.000	656.3	1.12	0	5.35	0.70286	18.085	6.61738
6/17/2018 12:45:00 PM.000	655	1.78	0	5.35	0.72574	18.09	9.42286
6/17/2018 12:50:00 PM.000	653.6	1.92	0	5.4	0.72297	18.0975	7.75921
6/17/2018 12:55:00 PM.000	639.7	1.35	0	5.5	0.7503	18.0975	4.74455
6/17/2018 1:00:00 PM.000	633	0.68	0	5.51	0.8052	18.1075	4.02068
6/17/2018 1:05:00 PM.000	634.8	1.16	0	5.51	0.81737	18.11	7.43551
6/17/2018 1:10:00 PM.000	639.5	2.19	0	5.54	0.80871	18.1175	8.71617
6/17/2018 1:15:00 PM.000	635	2.09	0	5.6	0.82641	18.12	9.00899
6/17/2018 1:20:00 PM.000	638	1.39	0	5.7	0.83398	18.125	4.505
6/17/2018 1:25:00 PM.000	633.1	0.84	0	5.83	0.88592	18.1325	3.24782
6/17/2018 1:30:00 PM.000	633.5	0.62	0	5.91	0.9161	18.14	3.72824
6/17/2018 1:35:00 PM.000	624.6	0.96	0	5.92	0.9376	18.1475	7.25041
6/17/2018 1:40:00 PM.000	611.4	1.48	0	5.96	0.96415	18.1525	8.48345
6/17/2018 1:45:00 PM.000	611.8	1.67	0	6.07	0.97298	18.16	10.0675
6/17/2018 1:50:00 PM.000	600.2	2.28	0	6.12	0.93498	18.1625	13.5208
6/17/2018 1:55:00 PM.000	588.6	2	0	6.22	0.94155	18.17	9.17145
6/17/2018 2:00:00 PM.000	598	1.63	0	6.32	0.95054	18.1775	4.38736
6/17/2018 2:05:00 PM.000	598.6	1.2	0	6.44	0.95509	18.185	3.85181
6/17/2018 2:10:00 PM.000	609.3	1	0	6.51	0.96628	18.19	4.93643
6/17/2018 2:15:00 PM.000	601.9	0.24	0	6.56	1.07159	18.195	2.864
6/17/2018 2:20:00 PM.000	601.8	0.05	0	6.53	1.15182	18.2025	2.20707
6/17/2018 2:25:00 PM.000	820.8	0.04	0	6.41	1.2047	18.205	2.30856
6/17/2018 2:30:00 PM.000	1460.8	0.03	0	6.26	1.29181	18.2075	2.47566
6/17/2018 2:35:00 PM.000	1068.7	0.03	0	6.05	1.3515	18.2025	2.58977
6/17/2018 2:40:00 PM.000	638.2	0.03	0	5.76	1.39845	18.215	2.68054
6/17/2018 2:45:00 PM.000	568.5	0.03	0	5.48	1.4776	18.225	2.83295
6/17/2018 2:50:00 PM.000	558.5	0.03	0	5.34	1.52839	18.2275	2.93052
6/17/2018 2:55:00 PM.000	549.8	0.03	0	5.11	1.57089	18.235	3.01256
6/17/2018 3:00:00 PM.000	554.9	0.03	0	4.85	1.61732	18.2425	3.10216
6/17/2018 3:05:00 PM.000	561.1	0.03	0	4.69	1.6457	18.245	3.15679
6/17/2018 3:10:00 PM.000	571.3	0.03	0	4.45	1.69182	18.25	3.24566
6/17/2018 3:15:00 PM.000	560.6	0.03	0	4.21	1.72355	18.255	3.30693
6/17/2018 3:20:00 PM.000	558	0.03	0	4.05	1.73039	18.2575	3.32025
6/17/2018 3:25:00 PM.000	563.1	0.03	0	3.85	1.76254	18.2625	3.38235
6/17/2018 3:30:00 PM.000	567.4	0.03	0	3.64	1.78323	18.2675	3.42246
6/17/2018 3:35:00 PM.000	554.1	0.18	0	3.49	1.74443	18.2625	3.34759
6/17/2018 3:40:00 PM.000	556.6	0.92	0	3.29	1.68793	18.265	10.8393
6/17/2018 3:45:00 PM.000	568.5	0.87	0	3.21	1.66601	18.265	14.8234
6/17/2018 3:50:00 PM.000	580	1	0	3.28	1.60962	18.2575	17.4735
6/17/2018 3:55:00 PM.000	567.2	1.25	0	3.33	1.55628	18.255	19.2895
6/17/2018 4:00:00 PM.000	566	1.54	0	3.32	1.51297	18.2525	18.4652
6/17/2018 4:05:00 PM.000	560.1	1.56	0	3.44	1.46941	18.25	16.1752
6/17/2018 4:10:00 PM.000	567.5	1.68	0	3.52	1.41813	18.245	14.9013
6/17/2018 4:15:00 PM.000	564.3	1.56	0	3.64	1.40405	18.2425	11.6712
6/17/2018 4:20:00 PM.000	569	1.49	0	3.78	1.37403	18.24	12.5888
6/17/2018 4:25:00 PM.000	560.2	1.69	0	3.9	1.32463	18.235	15.678
6/17/2018 4:30:00 PM.000	562.8	2.2	0	3.99	1.28076	18.2375	15.1653
6/17/2018 4:35:00 PM.000	553.6	1.26	0	4.12	1.29826	18.24	6.97486
6/17/2018 4:40:00 PM.000	560.9	0.78	0	4.26	1.31592	18.2425	4.44521
6/17/2018 4:45:00 PM.000	562.1	0.7	0	4.32	1.29651	18.245	5.70839
6/17/2018 4:50:00 PM.000	559.6	1.4	0	4.37	1.29657	18.2475	10.4791
6/17/2018 4:55:00 PM.000	558	2.03	0	4.44	1.25687	18.25	11.7833
6/17/2018 5:00:00 PM.000	575	1.45	0	4.54	1.25446	18.2525	7.64987
6/17/2018 5:05:00 PM.000	597.5	0.97	0	4.65	1.25895	18.25	3.95734
6/17/2018 5:10:00 PM.000	602	0.69	0	4.76	1.26672	18.255	4.9984
6/17/2018 5:15:00 PM.000	586.9	1.3	0	4.85	1.25035	18.255	8.8692
6/17/2018 5:20:00 PM.000	589.7	1.84	0	4.93	1.21987	18.2575	10.3684
6/17/2018 5:25:00 PM.000	598.2	1.37	0	5.04	1.2303	18.26	6.55205
6/17/2018 5:30:00 PM.000	608.4	1.02	0	5.14	1.21956	18.26	4.33269
6/17/2018 5:35:00 PM.000	590.5	0.81	0	5.2	1.21722	18.2575	5.0122
6/17/2018 5:40:00 PM.000	600.3	1.33	0	5.28	1.20922	18.2575	7.2806
6/17/2018 5:45:00 PM.000	605	1.66	0	5.39	1.18837	18.255	8.07513
6/17/2018 5:50:00 PM.000	594.1	1.05	0	5.5	1.21198	18.2475	7.84019
6/17/2018 5:55:00 PM.000	579	0.91	0	5.54	1.19544	18.2475	5.48193
6/17/2018 6:00:00 PM.000	580.2	0.97	0	5.56	1.18407	18.245	6.40704
6/17/2018 6:05:00 PM.000	586.2	1.09	0	5.59	1.21931	18.24	7.10912
6/17/2018 6:10:00 PM.000	601.7	1.22	0	5.66	1.22233	18.235	9.65034
6/17/2018 6:15:00 PM.000	975.8	1.51	0	5.67	1.1921	18.235	9.29403
6/17/2018 6:20:00 PM.000	1133.6	1.5	0	5.73	1.18474	18.2275	7.3597
6/17/2018 6:25:00 PM.000	679	1.14	0	5.84	1.22027	18.2125	5.35314
6/17/2018 6:30:00 PM.000	587.5	0.85	0	5.93	1.23677	18.215	5.55806
6/17/2018 6:35:00 PM.000	562.6	1.06	0	5.98	1.20611	18.21	6.99142
6/17/2018 6:40:00 PM.000	561.7	1.1	0	6.02	1.23205	18.2025	7.93171
6/17/2018 6:45:00 PM.000	566.9	0.17	0	6.11	1.32703	18.2	2.20871
6/17/2018 6:50:00 PM.000	562.6	0.04	0	6.11	1.37403	18.2	2.63279
6/17/2018 6:55:00 PM.000	548.8	0.04	0	6.01	1.41897	18.1975	2.71875
6/17/2018 7:00:00 PM.000	549.7	0.03	0	5.92	1.51601	18.195	2.90454
6/17/2018 7:05:00 PM.000	561.9	0.03	0	5.77	1.55836	18.1925	2.98551
6/17/2018 7:10:00 PM.000	561.5	0.03	0	5.65	1.6019	18.19	3.06876
6/17/2018 7:15:00 PM.000	560.8	0.03	0	5.57	1.67986	18.18	3.21736
6/17/2018 7:20:00 PM.000	556.6	0.03	0	5.48	1.72678	18.175	3.30685
6/17/2018 7:25:00 PM.000	568.6	0.03	0	5.34	1.76697	18.17	3.38342
6/17/2018 7:30:00 PM.000	571.1	0.03	0	5.25	1.81126	18.165	3.46783
6/17/2018 7:35:00 PM.000	563.7	0.03	0	5.08	1.84811	18.165	3.53839
6/17/2018 7:40:00 PM.000	568.1	0.03	0	4.86	1.88618	18.16	3.61086
6/17/2018 7:45:00 PM.000	568.3	0.03	0	4.67	1.93736	18.1525	3.70819
6/17/2018 7:50:00 PM.000	559.7	0.03	0	4.52	1.97373	18.145	3.77714
6/17/2018 7:55:00 PM.000	559.3	0.03	0	4.3	1.99869	18.14	3.82445
6/17/2018 8:00:00 PM.000	557.1	0.03	0	4.12	2.02981	18.135	3.88355
6/17/2018 8:05:00 PM.000	563.5	0.03	0	3.99	2.05937	18.1325	3.93988
6/17/2018 8:10:00 PM.000	565.1	0.03	0	3.77	2.07958	18.1275	3.97807
6/17/2018 8:15:00 PM.000	550.7	0.03	0	3.58	2.07968	18.12	3.97756
6/17/2018 8:20:00 PM.000	549.6	0.03	0	3.42	2.07963	18.115	3.97699
6/17/2018 8:25:00 PM.000	550.1	0.03	0	3.22	2.0796	18.115	3.97693
6/17/2018 8:30:00 PM.000	548.6	0.09	0	3.04	2.07513	18.11	3.96791
6/17/2018 8:35:00 PM.000	544.5	0.47	0	2.89	2.05128	18.1075	8.76597
6/17/2018 8:40:00 PM.000	550.2	0.38	0	2.78	2.02739	18.105	14.6515
6/17/2018 8:45:00 PM.000	563	0.45	0	2.69	1.97236	18.0975	12.7048
6/17/2018 8:50:00 PM.000	567	0.59	0	2.7	1.91324	18.0925	19.0459
6/17/2018 8:55:00 PM.000	556.4	1.08	0	2.65	1.83891	18.0825	24.8596
6/17/2018 9:00:00 PM.000	556.1	1.56	0	2.64	1.7483	18.0825	25.6285
6/17/2018 9:05:00 PM.000	553.3	2.43	0	2.77	1.60929	18.0775	22.9495
6/17/2018 9:10:00 PM.000	550.2	2.8	0	2.91	1.5512	18.075	16.044
6/17/2018 9:15:00 PM.000	543.1	2.45	0	3.02	1.51717	18.0725	12.0381
6/17/2018 9:20:00 PM.000	539.1	1.42	0	3.21	1.49339	18.0625	10.0817
6/17/2018 9:25:00 PM.000	545.6	1.19	0	3.37	1.45568	18.06	11.286
6/17/2018 9:30:00 PM.000	541.2	1.47	0	3.45	1.41391	18.055	12.2503
6/17/2018 9:35:00 PM.000	531.4	2.04	0	3.58	1.36856	18.0475	14.8687
6/17/2018 9:40:00 PM.000	546.4	1.53	0	3.7	1.3656	18.0425	9.89671
6/17/2018 9:45:00 PM.000	548.3	1.13	0	3.81	1.34094	18.0375	5.41699
6/17/2018 9:50:00 PM.000	559.6	0.81	0	3.92	1.35329	18.03	6.06014
6/17/2018 9:55:00 PM.000	553	0.78	0	4.04	1.35117	18.0225	6.31376
6/17/2018 10:00:00 PM.000	561.1	1.02	0	4.12	1.33834	18.0225	6.56266
6/17/2018 10:05:00 PM.000	562.8	1.14	0	4.17	1.33539	18.0125	7.28731
6/17/2018 10:10:00 PM.000	561.1	1.36	0	4.27	1.30504	18.0075	8.27688
6/17/2018 10:15:00 PM.000	546.5	1.55	0	4.36	1.27994	18.005	8.32749
6/17/2018 10:20:00 PM.000	536.7	1.09	0	4.49	1.28318	18	5.88326
6/17/2018 10:25:00 PM.000	538.7	0.84	0	4.6	1.28296	17.9925	5.26942
6/17/2018 10:30:00 PM.000	558.3	1.01	0	4.67	1.25857	17.9875	7.17788
6/17/2018 10:35:00 PM.000	549.1	1.67	0	4.74	1.23121	17.9825	10.1802
6/17/2018 10:40:00 PM.000	558.4	1.63	0	4.83	1.22149	17.9775	6.8738
6/17/2018 10:45:00 PM.000	556.4	1.29	0	4.98	1.2058	17.9725	5.22724
6/17/2018 10:50:00 PM.000	558.7	0.5	0	5.08	1.25094	17.965	3.48626
6/17/2018 10:55:00 PM.000	550.3	0.52	0	5.1	1.24532	17.9625	4.73295
6/17/2018 11:00:00 PM.000	737.3	1.28	0	5.05	1.20064	17.955	10.5426
6/17/2018 11:05:00 PM.000	901.7	1.82	0	5.08	1.18706	17.94	14.8404
6/17/2018 11:10:00 PM.000	624.3	1.64	0	5.2	1.20145	17.9325	11.9184
6/17/2018 11:15:00 PM.000	550.3	1.1	0	5.22	1.16979	17.935	4.77673
6/17/2018 11:20:00 PM.000	548.8	0.7	0	5.28	1.216	17.925	6.13361
6/17/2018 11:25:00 PM.000	548.8	0.57	0	5.33	1.29289	17.915	4.4833
6/17/2018 11:30:00 PM.000	553.3	0.79	0	5.25	1.26517	17.9125	6.56489
6/17/2018 11:35:00 PM.000	573.9	1.42	0	5.23	1.23533	17.91	8.76968
6/17/2018 11:40:00 PM.000	595.6	2.02	0	5.44	1.25724	17.8975	14.4203
6/17/2018 11:45:00 PM.000	601.2	1.95	0	5.52	1.25002	17.895	13.0434
6/17/2018 11:50:00 PM.000	602.8	1.63	0	5.54	1.17984	17.895	5.44245
6/17/2018 11:55:00 PM.000	582.4	1.07	0	5.66	1.23496	17.885	5.19761
6/18/2018 12:00:00 AM.000	597.6	0.78	0	5.81	1.27295	17.8775	4.16349
6/18/2018 12:05:00 AM.000	591.6	0.41	0	5.78	1.25192	17.875	4.9815
6/18/2018 12:10:00 AM.000	599.4	0.06	0	5.84	1.37042	17.865	0.382705
6/18/2018 12:15:00 AM.000	592.8	0.04	0	5.84	1.45757	17.86	2.77045
6/18/2018 12:20:00 AM.000	595.8	0.04	0	5.68	1.45541	17.8525	2.76586
6/18/2018 12:25:00 AM.000	601.6	0.03	0	5.57	1.54151	17.845	2.92898
6/18/2018 12:30:00 AM.000	592.3	0.03	0	5.52	1.59988	17.8375	3.03937
6/18/2018 12:35:00 AM.000	574.2	0.04	0	5.31	1.60698	17.8325	3.05249
6/18/2018 12:40:00 AM.000	583.6	0.03	0	5.08	1.66826	17.8225	3.16816
6/18/2018 12:45:00 AM.000	587.3	0.03	0	4.95	1.72819	17.8175	3.2816
6/18/2018 12:50:00 AM.000	566.8	0.03	0	4.7	1.74444	17.81	3.31187
6/18/2018 12:55:00 AM.000	283.5	0.03	0	4.47	1.79524	17.805	3.40792
6/18/2018 1:00:00 AM.000	107.2	0.03	0	4.34	1.85211	17.8025	3.51569
6/18/2018 1:05:00 AM.000	59.8	0.03	0	4.14	1.88792	17.8025	3.58367
6/18/2018 1:10:00 AM.000	43.4	0.03	0	4.02	1.94541	17.8	3.69259
6/18/2018 1:15:00 AM.000	19.8	0.03	0	3.91	1.98631	17.7925	3.76956
6/18/2018 1:20:00 AM.000	260.6	0.65	0	3.72	1.91425	17.7925	2.30725
6/18/2018 1:25:00 AM.000	612.9	2.25	0	3.61	1.80645	17.79	18.3841
6/18/2018 1:30:00 AM.000	664.2	1.26	0	3.75	1.80181	17.78	12.1323
6/18/2018 1:35:00 AM.000	666.3	0.68	0	3.81	1.79824	17.7775	8.46205
6/18/2018 1:40:00 AM.000	661.9	0.67	0	3.78	1.75286	17.7775	8.92459
6/18/2018 1:45:00 AM.000	654.2	0.93	0	3.85	1.74049	17.77	15.5618
6/18/2018 1:50:00 AM.000	645.2	1.3	0	3.89	1.68968	17.7575	19.1792
6/18/2018 1:55:00 AM.000	630.8	1.32	0	3.86	1.64937	17.755	16.5917
6/18/2018 2:00:00 AM.000	632	1.18	0	3.9	1.62313	17.7525	16.3011
6/18/2018 2:05:00 AM.000	613.1	1.09	0	4.04	1.61487	17.7475	14.8746
6/18/2018 2:10:00 AM.000	297.7	1.32	0	4.05	1.58187	17.7375	14.5164
6/18/2018 2:15:00 AM.000	114.3	1.59	0	4.1	1.54831	17.7375	14.7872
6/18/2018 2:20:00 AM.000	57.5	1.7	0	4.24	1.52496	17.735	16.9056
6/18/2018 2:25:00 AM.000	23.2	1.86	0	4.36	1.51051	17.7325	14.0534
6/18/2018 2:30:00 AM.000	3.5	1.26	0	4.44	1.46535	17.73	5.641
6/18/2018 2:35:00 AM.000	299	0.75	0	4.57	1.50667	17.73	5.66903
6/18/2018 2:40:00 AM.000	607.5	0.86	0	4.62	1.49072	17.7275	5.55978
6/18/2018 2:45:00 AM.000	671	1.28	0	4.63	1.45751	17.7175	8.6708
6/18/2018 2:50:00 AM.000	673.1	1.76	0	4.74	1.42932	17.7125	12.1949
6/18/2018 2:55:00 AM.000	656.5	1.68	0	4.9	1.42864	17.71	10.0423
6/18/2018 3:00:00 AM.000	658.7	1.13	0	4.99	1.40323	17.7075	4.83927
6/18/2018 3:05:00 AM.000	604.7	0.82	0	5.1	1.41449	17.6975	5.36317
6/18/2018 3:10:00 AM.000	271.9	0.99	0	5.23	1.41168	17.6925	5.85901
6/18/2018 3:15:00 AM.000	106.6	1.37	0	5.26	1.38054	17.695	8.01712
6/18/2018 3:20:00 AM.000	55.1	1.59	0	5.34	1.35678	17.6875	9.59085
6/18/2018 3:25:00 AM.000	24.9	1.47	0	5.5	1.35196	17.685	8.93292
6/18/2018 3:30:00 AM.000	11.4	1.23	0	5.57	1.32808	17.685	5.74677
6/18/2018 3:35:00 AM.000	349.2	1.1	0	5.64	1.31271	17.685	5.72494
6/18/2018 3:40:00 AM.000	624.5	1.07	0	5.76	1.31655	17.6775	6.06928
6/18/2018 3:45:00 AM.000	662.6	0.89	0	5.88	1.32019	17.6725	4.85121
6/18/2018 3:50:00 AM.000	668.2	0.53	0	5.91	1.35232	17.6675	3.3804
6/18/2018 3:55:00 AM.000	662.3	0.58	0	5.89	1.34782	17.665	5.04096
6/18/2018 4:00:00 AM.000	673.2	1.08	0	5.89	1.31026	17.6575	11.1453
6/18/2018 4:05:00 AM.000	660.3	1.73	0	5.92	1.29847	17.65	20.0304
6/18/2018 4:10:00 AM.000	587.6	2.37	0	5.97	1.26096	17.65	17.5536
6/18/2018 4:15:00 AM.000	243.1	1.72	0	6.01	1.26441	17.6425	7.70725
6/18/2018 4:20:00 AM.000	95	1.44	0	6.07	1.24915	17.6425	5.91077
6/18/2018 4:25:00 AM.000	54.5	0.81	0	6.19	1.29287	17.645	5.4871
6/18/2018 4:30:00 AM.000	34.9	0.61	0	6.23	1.33042	17.6425	3.91979
6/18/2018 4:35:00 AM.000	-1.2	1.06	0	6.2	1.28825	17.635	6.65849
6/18/2018 4:40:00 AM.000	140.8	1.7	0	6.26	1.28226	17.635	10.7971
6/18/2018 4:45:00 AM.000	466.7	0.6	0	6.42	1.36021	17.6325	6.55638
6/18/2018 4:50:00 AM.000	630.3	0.09	0	6.43	1.40302	17.625	2.65193
6/18/2018 4:55:00 AM.000	602.9	0.04	0	6.36	1.43553	17.62	2.71307
6/18/2018 5:00:00 AM.000	272.8	0.04	0	6.34	1.54773	17.615	2.9248
6/18/2018 5:05:00 AM.000	110.7	0.04	0	6.27	1.58293	17.6125	2.99115
6/18/2018 5:10:00 AM.000	59.4	0.04	0	6.12	1.60979	17.6125	3.04192
6/18/2018 5:15:00 AM.000	32.5	0.04	0	6.08	1.69849	17.6075	3.20917
6/18/2018 5:20:00 AM.000	-2.5	0.03	0	5.98	1.73578	17.605	3.27944
6/18/2018 5:25:00 AM.000	-2.7	0.03	0	5.82	1.76433	17.6025	3.33319
6/18/2018 5:30:00 AM.000	-2.4	0.03	0	5.78	1.84153	17.6025	3.47906
6/18/2018 5:35:00 AM.000	261.1	0.03	0	5.71	1.88109	17.6025	3.5538
6/18/2018 5:40:00 AM.000	617.3	0.03	0	5.6	1.9132	17.5975	3.61405
6/18/2018 5:45:00 AM.000	666.1	0.03	0	5.51	1.98316	17.59	3.74555
6/18/2018 5:50:00 AM.000	665.3	0.03	0	5.42	2.02452	17.5875	3.82345
6/18/2018 5:55:00 AM.000	660.2	0.03	0	5.34	2.05398	17.5775	3.87817
6/18/2018 6:00:00 AM.000	651.6	0.03	0	5.25	2.07551	17.575	3.91859
6/18/2018 6:05:00 AM.000	424.4	0.03	0	5.05	2.0791	17.5725	3.92514
6/18/2018 6:10:00 AM.000	155.6	0.03	0	4.8	2.0791	17.57	3.92491
6/18/2018 6:15:00 AM.000	74.1	0.03	0	4.7	2.0791	17.5675	3.92467
6/18/2018 6:20:00 AM.000	36.4	0.03	0	4.57	2.0791	17.57	3.92491
6/18/2018 6:25:00 AM.000	-2.5	0.03	0	4.38	2.0791	17.5675	3.92467
6/18/2018 6:30:00 AM.000	-2.8	0.03	0	4.27	2.0791	17.5675	3.92467
6/18/2018 6:35:00 AM.000	-2.6	0.03	0	4.19	2.0791	17.5675	3.92467
6/18/2018 6:40:00 AM.000	0	0.03	0	4.05	2.0791	17.5675	3.92467
6/18/2018 6:45:00 AM.000	358.6	0.03	0	3.96	2.0791	17.5675	3.92467
6/18/2018 6:50:00 AM.000	632.8	0.03	0	3.9	2.0791	17.565	3.92444
6/18/2018 6:55:00 AM.000	640	0.03	0	3.76	2.0791	17.56	3.92398
6/18/2018 7:00:00 AM.000	646.6	0.03	0	3.55	2.0791	17.56	3.92398
6/18/2018 7:05:00 AM.000	349.4	0.03	0	3.36	2.07912	17.56	3.92401
6/18/2018 7:10:00 AM.000	134.6	0.03	0	3.18	2.07925	17.56	3.92426
6/18/2018 7:15:00 AM.000	70.7	0.03	0	2.98	2.07925	17.56	3.92426
6/18/2018 7:20:00 AM.000	33.6	0.03	0	2.85	2.07952	17.56	3.92477
6/18/2018 7:25:00 AM.000	-2.6	0.03	0	2.77	2.07967	17.56	3.92505
6/18/2018 7:30:00 AM.000	241.3	0.06	0	2.59	2.07968	17.5625	3.9253
6/18/2018 7:35:00 AM.000	609.1	0.43	0	2.44	2.07968	17.5625	6.6615
6/18/2018 7:40:00 AM.000	673.8	0.6	0	2.42	2.07967	17.5625	11.9638
6/18/2018 7:45:00 AM.000	654.5	1.26	0	2.42	2.07968	17.5625	14.3762
6/18/2018 7:50:00 AM.000	376.8	1.88	0	2.52	2.07968	17.5625	22.8596
6/18/2018 7:55:00 AM.000	127.3	1.6	0	2.63	2.07968	17.5625	16.8184
6/18/2018 8:00:00 AM.000	58.1	0.75	0	2.73	2.07967	17.5675	7.09438
6/18/2018 8:05:00 AM.000	33.9	0.35	0	2.82	2.07968	17.57	4.87843
6/18/2018 8:10:00 AM.000	-2.4	0.44	0	2.87	2.07968	17.5725	7.94028
6/18/2018 8:15:00 AM.000	-2.2	0.78	0	2.9	2.07968	17.5775	15.9611
6/18/2018 8:20:00 AM.000	-2.5	1.48	0	2.95	2.0786	17.58	22.1656
6/18/2018 8:25:00 AM.000	15.4	2.07	0	3.04	2.00971	17.5825	22.6659
6/18/2018 8:30:00 AM.000	269	1.85	0	3.15	1.98372	17.585	16.7829
6/18/2018 8:35:00 AM.000	748.5	1.25	0	3.27	1.95883	17.59	7.12087
6/18/2018 8:40:00 AM.000	697.6	0.72	0	3.41	1.96033	17.5925	5.44782
6/18/2018 8:45:00 AM.000	707.1	0.59	0	3.5	1.94165	17.5925	5.25058
6/18/2018 8:50:00 AM.000	706	0.13	0	3.56	2.02061	17.6	3.72947
6/18/2018 8:55:00 AM.000	681	0.04	0	3.54	2.07388	17.5975	3.91761
6/18/2018 9:00:00 AM.000	440.4	0.03	0	3.44	2.06637	17.6025	3.90388
6/18/2018 9:05:00 AM.000	145.7	0.03	0	3.27	2.07968	17.605	3.92926
6/18/2018 9:10:00 AM.000	226	0.03	0	3.07	2.07968	17.615	3.9302
6/18/2018 9:15:00 AM.000	404	0.03	0	2.94	2.07968	17.6175	3.93043
6/18/2018 9:20:00 AM.000	616.2	0.03	0	2.82	2.07968	17.6225	3.93089
6/18/2018 9:25:00 AM.000	673.4	0.03	0	2.56	2.07968	17.625	3.93113
6/18/2018 9:30:00 AM.000	694.7	0.03	0	2.42	2.07968	17.6325	3.93183
6/18/2018 9:35:00 AM.000	684.6	0.03	0	2.25	2.07968	17.6325	3.93183
6/18/2018 9:40:00 AM.000	415.5	0.03	0	1.99	2.07968	17.64	3.93253
6/18/2018 9:45:00 AM.000	143.3	0.03	0	1.77	2.07968	17.6475	3.93323
6/18/2018 9:50:00 AM.000	69.4	0.03	0	1.58	2.07968	17.655	3.93393
6/18/2018 9:55:00 AM.000	32.6	0.03	0	1.42	2.07857	17.6625	3.93253
6/18/2018 10:00:00 AM.000	29.4	0.03	0	1.27	2.01047	17.67	3.80435
6/18/2018 10:05:00 AM.000	434.4	0.03	0	1.09	1.93988	17.68	3.67163
6/18/2018 10:10:00 AM.000	678	0.03	0	0.98	1.76503	17.6825	3.34085
6/18/2018 10:15:00 AM.000	708.2	0.1	0	0.87	1.61281	17.6875	3.05305
6/18/2018 10:20:00 AM.000	708.2	0.28	0	0.58	1.60678	17.6975	7.63604
6/18/2018 10:25:00 AM.000	713.9	0.24	5.7	0.47	1.50917	17.7025	9.84406
6/18/2018 10:30:00 AM.000	714.5	0.21	18.17	0.41	1.32888	17.7075	10.0205
6/18/2018 10:35:00 AM.000	696.3	0.52	20.1	0.29	1.31131	17.7125	13.8773
6/18/2018 10:40:00 AM.000	698.5	1.17	20.1	0.22	1.28052	17.7225	18.7892
6/18/2018 10:45:00 AM.000	704.3	1.93	20.1	0.29	1.1629	17.725	12.5467
6/18/2018 10:50:00 AM.000	703.5	1.67	20.1	0.46	1.09642	17.73	10.9446
6/18/2018 10:55:00 AM.000	682.2	1.45	20.1	0.59	1.11639	17.74	9.62602
6/18/2018 11:00:00 AM.000	689.5	1.4	20.1	0.71	1.07139	17.745	10.6664
6/18/2018 11:05:00 AM.000	705.7	1.36	20.1	0.91	1.00983	17.7525	11.0628
6/18/2018 11:10:00 AM.000	699.5	1.5	20.1	1.03	1.00162	17.7575	11.0672
6/18/2018 11:15:00 AM.000	706.1	1.65	20.1	1.11	1.00269	17.765	10.4772
6/18/2018 11:20:00 AM.000	694.2	1.16	20.1	1.28	0.97592	17.77	7.22445
6/18/2018 11:25:00 AM.000	685.5	0.76	20.1	1.53	0.98291	17.7775	4.93039
6/18/2018 11:30:00 AM.000	672.7	0.95	20.1	1.54	0.99987	17.7875	5.05752
6/18/2018 11:35:00 AM.000	660	1.15	20.1	1.61	0.99144	17.7975	8.03628
6/18/2018 11:40:00 AM.000	635.2	1.07	20.1	1.77	0.98701	17.795	7.23873
6/18/2018 11:45:00 AM.000	443.6	1.02	20.1	1.89	0.99619	17.7975	7.79124
6/18/2018 11:50:00 AM.000	594	1.11	20.1	1.97	0.99738	17.8025	6.91389
6/18/2018 11:55:00 AM.000	686.8	1.28	20.1	2.14	0.98638	17.81	6.45101
6/18/2018 12:00:00 PM.000	699	1.44	20.1	2.25	0.98208	17.815	8.15977
6/18/2018 12:05:00 PM.000	711.1	1.32	20.1	2.31	0.98273	17.82	9.25959
6/18/2018 12:10:00 PM.000	717.8	1.17	20.1	2.47	0.97407	17.8225	5.55049
6/18/2018 12:15:00 PM.000	705.9	0.91	20.1	2.61	0.9953	17.8225	4.78989
6/18/2018 12:20:00 PM.000	704.9	0.68	20.1	2.68	1.04606	17.8275	5.7596
6/18/2018 12:25:00 PM.000	714.6	0.69	20.1	2.71	1.05753	17.8325	7.05438
6/18/2018 12:30:00 PM.000	705.9	1.36	20.1	2.61	1.01462	17.83	12.1869
6/18/2018 12:35:00 PM.000	676.8	1.69	20.1	2.71	1.02436	17.8325	13.1516
6/18/2018 12:40:00 PM.000	668.6	1.77	20.1	2.86	1.03248	17.835	14.325
6/18/2018 12:45:00 PM.000	669.5	1.8	20.1	2.91	1.00597	17.8375	12.7944
6/18/2018 12:50:00 PM.000	662.7	1.21	20.1	2.99	1.03233	17.8375	9.09466
6/18/2018 12:55:00 PM.000	659.9	0.74	20.1	3.09	1.11051	17.8375	7.03139
6/18/2018 1:00:00 PM.000	669.2	0.87	20.1	3.05	1.1394	17.8425	9.44926
6/18/2018 1:05:00 PM.000	666.3	1.22	20.1	2.98	1.15357	17.8425	15.1453
6/18/2018 1:10:00 PM.000	657.8	1.65	20.1	3.06	1.16086	17.845	18.9996
6/18/2018 1:15:00 PM.000	656	2.1	20.1	3.13	1.14301	17.8525	20.4396
6/18/2018 1:20:00 PM.000	663.1	1.79	20.1	3.17	1.16548	17.86	13.0495
6/18/2018 1:25:00 PM.000	660.9	0.68	20.1	3.23	1.24425	17.8625	5.89007
6/18/2018 1:30:00 PM.000	676.1	0.29	20.1	3.26	1.39129	17.865	5.44467
6/18/2018 1:35:00 PM.000	669.6	0.26	20.1	3.13	1.46316	17.87	10.0431
6/18/2018 1:40:00 PM.000	677.6	0.78	20.1	2.96	1.46596	17.875	14.5362
6/18/2018 1:45:00 PM.000	684.2	1.26	20.1	2.93	1.49057	17.8725	17.0717
6/18/2018 1:50:00 PM.000	662.4	1.69	20.1	3.03	1.52415	17.88	18.579
6/18/2018 1:55:00 PM.000	664.1	1.95	20.1	3.09	1.47929	17.88	19.9066
6/18/2018 2:00:00 PM.000	687.4	2.41	20.1	3.16	1.4309	17.89	21.0618
6/18/2018 2:05:00 PM.000	679.1	1.5	20.1	3.36	1.48947	17.8925	8.96198
6/18/2018 2:10:00 PM.000	679.2	0.84	20.1	3.49	1.55862	17.9025	7.38386
6/18/2018 2:15:00 PM.000	669.8	0.83	20.1	3.5	1.54581	17.9075	6.41472
6/18/2018 2:20:00 PM.000	671.9	1.08	20.1	3.51	1.60549	17.9175	11.0511
6/18/2018 2:25:00 PM.000	671.7	1.26	20.1	3.62	1.6553	17.9225	11.9926
6/18/2018 2:30:00 PM.000	659.3	1.4	20.1	3.62	1.62426	17.9325	13.1448
6/18/2018 2:35:00 PM.000	670	1.95	20.1	3.65	1.59337	17.935	17.9484
6/18/2018 2:40:00 PM.000	681.2	1.95	20.1	3.79	1.61674	17.945	21.0692
6/18/2018 2:45:00 PM.000	684.4	1.28	20.1	3.93	1.62157	17.95	11.9526
6/18/2018 2:50:00 PM.000	681.3	0.41	20.1	4.02	1.7353	17.955	6.30234
6/18/2018 2:55:00 PM.000	659.1	0.05	20.1	4.04	1.90883	17.9575	3.63671
6/18/2018 3:00:00 PM.000	668.2	0.04	20.1	3.88	2.02751	17.965	3.86354
6/18/2018 3:05:00 PM.000	668.7	0.04	20.1	3.48	2.07468	17.97	3.9539
6/18/2018 3:10:00 PM.000	655.2	0.03	20.1	3.22	2.07968	17.9775	3.96413
6/18/2018 3:15:00 PM.000	657.6	0.03	20.1	2.97	2.07968	17.9825	3.9646
6/18/2018 3:20:00 PM.000	664.2	0.03	20.1	2.63	2.07968	17.9875	3.96507
6/18/2018 3:25:00 PM.000	670.5	0.03	20.1	2.31	2.07968	17.9925	3.96554
6/18/2018 3:30:00 PM.000	666	0.03	20.1	2.1	2.07968	17.9975	3.96602
6/18/2018 3:35:00 PM.000	657.3	0.03	20.1	1.8	2.07968	18.005	3.96672
6/18/2018 3:40:00 PM.000	653.7	0.15	20.1	1.47	2.07968	18.01	3.96719
6/18/2018 3:45:00 PM.000	659.4	0.64	20.1	1.25	2.07968	18.01	13.5215
6/18/2018 3:50:00 PM.000	663.9	0.5	20.1	1.07	2.07968	18.0225	19.2749
6/18/2018 3:55:00 PM.000	660.9	0.42	20.1	0.97	2.07968	18.0275	16.6874
6/18/2018 4:00:00 PM.000	669.8	0.62	20.1	1.02	2.07968	18.0275	26.5545
6/18/2018 4:05:00 PM.000	651.9	1.01	20.1	0.91	2.07968	18.0325	35.2736
6/18/2018 4:10:00 PM.000	645.9	1.42	20.1	0.79	2.07968	18.04	36.1709
6/18/2018 4:15:00 PM.000	639.2	2	20.1	0.92	2.06784	18.0425	38.3175
6/18/2018 4:20:00 PM.000	643.7	2.26	20.1	1.11	1.95269	18.045	30.7083
6/18/2018 4:25:00 PM.000	648.7	1.75	20.1	1.22	1.92096	18.0475	24.1717
6/18/2018 4:30:00 PM.000	645.5	1.15	20.1	1.31	1.90776	18.0525	24.8844
6/18/2018 4:35:00 PM.000	639.7	0.84	20.1	1.4	1.90587	18.05	25.9044
6/18/2018 4:40:00 PM.000	658.9	1.56	20.1	1.4	1.8336	18.05	25.57
6/18/2018 4:45:00 PM.000	656.2	1.58	20.1	1.47	1.82452	18.0525	20.1171
6/18/2018 4:50:00 PM.000	644.7	1.43	20.1	1.69	1.81941	18.05	21.2024
6/18/2018 4:55:00 PM.000	645.6	1.82	20.1	1.79	1.73615	18.05	25.7626
6/18/2018 5:00:00 PM.000	655.7	2.03	20.1	1.87	1.69857	18.0575	24.9032
6/18/2018 5:05:00 PM.000	667.5	1.34	20.1	2.13	1.73585	18.06	16.998
6/18/2018 5:10:00 PM.000	661.7	0.75	20.1	2.29	1.74602	18.06	10.0935
6/18/2018 5:15:00 PM.000	625.3	1.21	20.1	2.28	1.74091	18.0675	12.7123
6/18/2018 5:20:00 PM.000	637.7	1.22	20.1	2.4	1.74631	18.0675	15.9999
6/18/2018 5:25:00 PM.000	639.1	1.34	20.1	2.57	1.73862	18.07	15.5208
6/18/2018 5:30:00 PM.000	628.2	1.69	20.1	2.62	1.69911	18.07	17.793
6/18/2018 5:35:00 PM.000	629	1.68	20.1	2.71	1.6842	18.0725	20.5301
6/18/2018 5:40:00 PM.000	636.8	1.29	20.11	2.91	1.68723	18.075	13.7259
6/18/2018 5:45:00 PM.000	629.4	0.99	20.1	3.07	1.70053	18.0725	8.55495
6/18/2018 5:50:00 PM.000	646.1	0.66	20.1	3.15	1.7201	18.075	9.25087
6/18/2018 5:55:00 PM.000	640.1	1.34	20.1	3.21	1.72494	18.0775	18.3477
6/18/2018 6:00:00 PM.000	636.2	1.98	20.1	3.27	1.64931	18.075	20.4327
6/18/2018 6:05:00 PM.000	416.4	1.8	20.1	3.36	1.63725	18.075	17.3329
6/18/2018 6:10:00 PM.000	392.1	1.08	20.1	3.53	1.65039	18.08	7.33074
6/18/2018 6:15:00 PM.000	497.7	0.66	20.11	3.68	1.69	18.0825	7.00796
6/18/2018 6:20:00 PM.000	671.7	0.84	20.1	3.73	1.70284	18.08	11.5361
6/18/2018 6:25:00 PM.000	699.9	1.09	20.1	3.67	1.65879	18.0825	19.5889
6/18/2018 6:30:00 PM.000	698.3	1.68	20.1	3.7	1.60936	18.0825	21.6184
6/18/2018 6:35:00 PM.000	693.9	1.56	20.1	3.83	1.65691	18.08	18.6813
6/18/2018 6:40:00 PM.000	694.9	1.34	20.1	3.92	1.64881	18.0825	17.9855
6/18/2018 6:45:00 PM.000	699.9	1.36	20.1	3.92	1.59663	18.0825	20.4858
6/18/2018 6:50:00 PM.000	699.3	1.4	20.1	4.04	1.6331	18.08	26.1382
6/18/2018 6:55:00 PM.000	692.5	1.99	20.1	4.11	1.58009	18.0775	25.9406
6/18/2018 7:00:00 PM.000	707.2	2.74	20.1	4.1	1.46603	18.08	19.1278
6/18/2018 7:05:00 PM.000	705.6	1.58	20.1	4.32	1.54955	18.0825	10.2385
6/18/2018 7:10:00 PM.000	700.7	0.77	20.1	4.56	1.64601	18.08	8.99167
6/18/2018 7:15:00 PM.000	680.8	0.98	20.11	4.52	1.54209	18.08	7.60371
6/18/2018 7:20:00 PM.000	670.2	1.32	20.1	4.55	1.53494	18.075	12.9958
6/18/2018 7:25:00 PM.000	680.7	1.66	20.1	4.82	1.62667	18.0775	16.1957
6/18/2018 7:30:00 PM.000	675.2	1.97	20.1	4.86	1.52206	18.08	16.6665
6/18/2018 7:35:00 PM.000	652.5	1.46	20.08	4.9	1.48889	18.075	11.5542
6/18/2018 7:40:00 PM.000	659.1	0.29	18.08	5.16	1.66327	18.075	0.587122
6/18/2018 7:45:00 PM.000	658.4	0.05	17.73	5.16	1.72217	18.0775	3.2904
6/18/2018 7:50:00 PM.000	646.8	0.04	16.28	4.9	1.75182	18.0725	3.34666
6/18/2018 7:55:00 PM.000	653.5	0.04	15.94	4.79	1.94931	18.0675	3.72355
6/18/2018 8:00:00 PM.000	662.5	0.03	13.46	4.61	2.00339	18.07	3.82709
6/18/2018 8:05:00 PM.000	655	0.03	14.53	4.09	1.99829	18.07	3.81734
6/18/2018 8:10:00 PM.000	663.1	0.03	16.93	4	2.07823	18.0675	3.96984
6/18/2018 8:15:00 PM.000	656.6	0.03	17.98	3.71	2.07962	18.07	3.97273
6/18/2018 8:20:00 PM.000	659.2	0.03	19.78	3.29	2.07961	18.07	3.97271
6/18/2018 8:25:00 PM.000	598.9	0.03	20.1	3.07	2.07935	18.0675	3.97198
6/18/2018 8:30:00 PM.000	246.4	0.03	20.1	2.84	2.07957	18.0625	3.97192
6/18/2018 8:35:00 PM.000	105.7	0.03	20.1	2.44	2.07965	18.0675	3.97255
6/18/2018 8:40:00 PM.000	113.7	0.03	20.1	2.24	2.07966	18.07	3.9728
6/18/2018 8:45:00 PM.000	483.5	0.31	20.1	2.07	2.07703	18.0675	3.33811
6/18/2018 8:50:00 PM.000	689.1	0.6	20.1	1.82	1.98883	18.065	16.7132
6/18/2018 8:55:00 PM.000	712.7	0.63	20.1	1.77	1.88381	18.0625	20.6859
6/18/2018 9:00:00 PM.000	712.6	0.92	20.1	1.79	1.82378	18.0625	23.5971
6/18/2018 9:05:00 PM.000	719.5	1.35	20.1	1.76	1.66763	18.06	25.0569
6/18/2018 9:10:00 PM.000	713.2	1.99	20.1	1.82	1.47849	18.06	31.9962
6/18/2018 9:15:00 PM.000	696.7	2.32	20.1	1.99	1.40555	18.0625	24.2198
6/18/2018 9:20:00 PM.000	714.5	1.06	20.1	2.09	1.40049	18.06	15.9779
6/18/2018 9:25:00 PM.000	713.6	0.96	20.1	2.14	1.36336	18.06	20.9113
6/18/2018 9:30:00 PM.000	705.9	1.63	20.1	2.27	1.27904	18.0575	21.9436
6/18/2018 9:35:00 PM.000	705.6	2.2	20.1	2.38	1.24296	18.055	20.1908
6/18/2018 9:40:00 PM.000	702	1.79	20.1	2.61	1.23572	18.0525	13.5319
6/18/2018 9:45:00 PM.000	702.9	0.79	20.1	2.74	1.22073	18.0575	7.34733
6/18/2018 9:50:00 PM.000	704.5	0.87	20.1	2.83	1.21953	18.055	7.87641
6/18/2018 9:55:00 PM.000	686.3	1.17	20.1	2.92	1.22471	18.0525	9.06332
6/18/2018 10:00:00 PM.000	699.4	0.78	20.11	3.03	1.24103	18.0525	7.29661
6/18/2018 10:05:00 PM.000	682	0.9	20.07	3.05	1.24115	18.0475	8.0789
6/18/2018 10:10:00 PM.000	664.4	1.11	20.08	3.08	1.22935	18.0475	12.121
6/18/2018 10:15:00 PM.000	674.5	1.79	19.5	3.14	1.19367	18.045	16.2036
6/18/2018 10:20:00 PM.000	673	2.24	18.35	3.29	1.13744	18.045	17.9756
6/18/2018 10:25:00 PM.000	668.1	1.67	16.75	3.47	1.13455	18.045	11.4647
6/18/2018 10:30:00 PM.000	665	1.56	12.44	3.65	1.10205	18.045	7.42064
6/18/2018 10:35:00 PM.000	664.2	1.19	11.18	3.81	1.08857	18.045	6.58541
6/18/2018 10:40:00 PM.000	680.4	0.75	10.21	3.94	1.09547	18.0425	5.7601
6/18/2018 10:45:00 PM.000	674.8	0.88	10.48	3.99	1.08959	18.0425	6.58481
6/18/2018 10:50:00 PM.000	669.3	1.93	10.55	4.03	1.03771	18.0425	10.6744
6/18/2018 10:55:00 PM.000	654.4	1.49	10.28	4.15	1.04334	18.0375	9.13576
6/18/2018 11:00:00 PM.000	665.4	0.27	10.65	4.31	1.10244	18.035	1.12814
6/18/2018 11:05:00 PM.000	680.5	0.05	10.49	4.27	1.16904	18.035	2.23119
6/18/2018 11:10:00 PM.000	658.3	0.04	11.18	4.03	1.21174	18.0325	2.31257
6/18/2018 11:15:00 PM.000	637	0.03	11.8	3.78	1.29516	18.0325	2.4718
6/18/2018 11:20:00 PM.000	648.5	0.03	15.35	3.55	1.32387	18.03	2.52645
6/18/2018 11:25:00 PM.000	641.5	0.03	14.57	3.27	1.3465	18.0275	2.5695
6/18/2018 11:30:00 PM.000	642.4	0.03	13.44	2.95	1.39894	18.025	2.66942
6/18/2018 11:35:00 PM.000	645.7	0.05	14.91	2.71	1.36555	18.025	2.6057
6/18/2018 11:40:00 PM.000	654.7	0.3	16.31	2.4	1.30467	18.0275	4.06946
6/18/2018 11:45:00 PM.000	668.5	0.32	17.89	2.16	1.30878	18.025	10.2469
6/18/2018 11:50:00 PM.000	659	0.38	20.09	2.12	1.20728	18.02	9.99322
6/18/2018 11:55:00 PM.000	647.8	0.59	20.09	2.08	1.13835	18.02	13.3443
6/19/2018 12:00:00 AM.000	663.4	0.87	20.09	2.02	1.12812	18.0175	15.4858
6/19/2018 12:05:00 AM.000	656.5	1.09	20.09	2.06	1.04698	18.0175	17.4894
6/19/2018 12:10:00 AM.000	659.2	1.31	20.09	2.12	0.95371	18.0175	16.6302
6/19/2018 12:15:00 AM.000	670.8	1.68	20.09	2.17	0.91911	18.015	17.7988
6/19/2018 12:20:00 AM.000	673.7	1.89	20.09	2.24	0.88424	18.015	12.1667
6/19/2018 12:25:00 AM.000	665.2	1.33	20.09	2.42	0.84806	18.0175	12.123
6/19/2018 12:30:00 AM.000	656.8	0.8	19.97	2.55	0.85956	18.0125	12.5047
6/19/2018 12:35:00 AM.000	645.1	0.99	19.8	2.54	0.86072	18.0125	12.2614
6/19/2018 12:40:00 AM.000	663.1	1.9	20.01	2.57	0.81964	18.015	10.4197
6/19/2018 12:45:00 AM.000	658.2	1.59	20.1	2.81	0.81054	18.01	8.3449
6/19/2018 12:50:00 AM.000	635.2	1.47	20.1	2.98	0.82581	18.01	9.49001
6/19/2018 12:55:00 AM.000	626.3	1.45	20.11	3.05	0.80247	18.01	9.40779
6/19/2018 1:00:00 AM.000	635.2	1.54	20.1	3.21	0.78637	18.0075	9.56992
6/19/2018 1:05:00 AM.000	633.3	1.6	19.87	3.45	0.80377	18.0025	8.38474
6/19/2018 1:10:00 AM.000	633.1	1.43	18.65	3.5	0.80218	18.0025	7.09329
6/19/2018 1:15:00 AM.000	617	1.45	17.63	3.59	0.78765	18.0025	7.26954
6/19/2018 1:20:00 AM.000	626.8	1.71	17.74	3.74	0.79412	17.9975	8.35609
6/19/2018 1:25:00 AM.000	640.3	1.63	16.31	3.82	0.7946	17.9975	8.52454
6/19/2018 1:30:00 AM.000	628.6	0.92	13.89	3.94	0.78528	18.0025	3.64089
6/19/2018 1:35:00 AM.000	620.9	0.71	13.41	4.1	0.82849	17.9975	3.30728
6/19/2018 1:40:00 AM.000	619.9	1.59	13.1	4.17	0.81878	17.995	8.99836
6/19/2018 1:45:00 AM.000	608	2.33	12.72	4.18	0.77115	17.995	11.295
6/19/2018 1:50:00 AM.000	614.2	1.61	12.65	4.39	0.78359	17.99	8.44375
6/19/2018 1:55:00 AM.000	606.8	1.31	12.44	4.55	0.78597	17.99	5.16923
6/19/2018 2:00:00 AM.000	603	1.03	11.84	4.62	0.75531	17.99	3.91299
6/19/2018 2:05:00 AM.000	620.1	0.25	11.59	4.77	0.83944	17.99	2.72957
6/19/2018 2:10:00 AM.000	605.4	0.04	11.15	4.79	0.95215	17.9875	1.81512
6/19/2018 2:15:00 AM.000	605.7	0.04	10.61	4.5	0.96609	17.9875	1.8417
6/19/2018 2:20:00 AM.000	622.4	0.04	9.36	4.21	1.05451	17.99	2.01042
6/19/2018 2:25:00 AM.000	609.8	0.03	9.47	4.05	1.14229	17.9825	2.17742
6/19/2018 2:30:00 AM.000	612.5	0.03	12.56	3.76	1.14388	17.9825	2.18045
6/19/2018 2:35:00 AM.000	607.9	0.03	14.24	3.4	1.20115	17.98	2.2895
6/19/2018 2:40:00 AM.000	620.2	0.03	16.12	3.15	1.23099	17.9775	2.34625
6/19/2018 2:45:00 AM.000	626.6	0.04	17.76	2.76	1.19797	17.9775	2.2833
6/19/2018 2:50:00 AM.000	522.9	0.5	18.13	2.4	1.17755	17.975	4.51616
6/19/2018 2:55:00 AM.000	200	1.07	19.7	2.32	1.13814	17.9725	16.069
6/19/2018 3:00:00 AM.000	100.8	1.62	20.1	2.37	1.01893	17.975	14.0111
6/19/2018 3:05:00 AM.000	62.3	2.06	20.1	2.42	0.98419	17.975	11.3395
6/19/2018 3:10:00 AM.000	44.3	0.94	20.1	2.6	1.0236	17.975	5.8724
6/19/2018 3:15:00 AM.000	42.3	0.53	20.1	2.71	0.97837	17.975	4.56656
6/19/2018 3:20:00 AM.000	30.7	0.81	19.3	2.71	0.96477	17.9775	7.03331
6/19/2018 3:25:00 AM.000	394.2	0.98	19.16	2.81	0.9807	17.9775	9.87543
6/19/2018 3:30:00 AM.000	654.6	1.39	18.68	2.86	0.95424	17.975	12.673
6/19/2018 3:35:00 AM.000	680.9	1.3	15.14	2.93	0.91388	17.9725	12.2926
6/19/2018 3:40:00 AM.000	694.9	1.77	16.74	2.94	0.87286	17.9725	13.029
6/19/2018 3:45:00 AM.000	705.4	2.48	17.51	3.15	0.81796	17.9725	12.4889
6/19/2018 3:50:00 AM.000	699.6	2.8	18.27	3.42	0.77724	17.97	11.8996
6/19/2018 3:55:00 AM.000	699.6	2.13	17.64	3.57	0.79074	17.9675	9.72431
6/19/2018 4:00:00 AM.000	660.2	1.15	15.64	3.78	0.76982	17.9625	5.94471
6/19/2018 4:05:00 AM.000	291.3	0.94	14.53	3.94	0.76098	17.96	5.22749
6/19/2018 4:10:00 AM.000	120.5	1.19	13.83	4.03	0.76373	17.9575	7.66919
6/19/2018 4:15:00 AM.000	65.2	1.73	12.94	4.09	0.76954	17.96	9.33402
6/19/2018 4:20:00 AM.000	44.2	2.57	11.81	4.23	0.70876	17.955	9.61791
6/19/2018 4:25:00 AM.000	42.3	2.11	11.31	4.48	0.71108	17.9525	5.49072
6/19/2018 4:30:00 AM.000	3.8	1.69	10.84	4.66	0.71892	17.955	2.63228
6/19/2018 4:35:00 AM.000	108.5	1.5	10.32	4.82	0.69203	17.9525	3.40559
6/19/2018 4:40:00 AM.000	565	1.52	9.81	4.97	0.68474	17.9525	3.48053
6/19/2018 4:45:00 AM.000	694.2	1.45	9.59	5.13	0.68347	17.9475	3.45217
6/19/2018 4:50:00 AM.000	712.1	1.42	9.48	5.28	0.66547	17.9475	2.85599
6/19/2018 4:55:00 AM.000	700.1	1.3	9.41	5.44	0.65392	17.945	2.81514
6/19/2018 5:00:00 AM.000	692.1	1.12	7.52	5.58	0.65422	17.9425	3.31745
6/19/2018 5:05:00 AM.000	710.8	1.28	6.3	5.68	0.63627	17.9425	3.74317
6/19/2018 5:10:00 AM.000	680.2	1.16	6.26	5.77	0.63043	17.94	4.02498
6/19/2018 5:15:00 AM.000	386.4	0.2	6.42	5.78	0.63481	17.935	0.281433
6/19/2018 5:20:00 AM.000	148.7	0.05	7.04	5.75	0.57396	17.9375	1.0927
6/19/2018 5:25:00 AM.000	74.4	0.04	8.74	5.55	0.609	17.9375	1.15943
6/19/2018 5:30:00 AM.000	49	0.04	9.35	5.4	0.55944	17.935	1.06498
6/19/2018 5:35:00 AM.000	40	0.03	9.72	5.23	0.40575	17.9325	0.772244
6/19/2018 5:40:00 AM.000	-1.9	0.03	9.6	5.07	0.45478	17.9325	0.865612
6/19/2018 5:45:00 AM.000	-2.1	0.03	9.86	4.86	0.38465	17.93	0.73202
6/19/2018 5:50:00 AM.000	-2.6	0.03	10.52	4.75	0.3996	17.93	0.760488
6/19/2018 5:55:00 AM.000	27	0.03	10.69	4.58	0.50177	17.93	0.955038
6/19/2018 6:00:00 AM.000	468.4	0.03	10.51	4.36	0.17921	17.9275	0.340804
6/19/2018 6:05:00 AM.000	686.4	0.03	11.31	4.2	0.01361	17.9275	0.0254898
6/19/2018 6:10:00 AM.000	702.8	0.03	11.45	3.97	0.0063	17.925	0.0115703
6/19/2018 6:15:00 AM.000	712	0.03	11.74	3.65	0.00512	17.9225	0.00932307
6/19/2018 6:20:00 AM.000	729.3	0.1	13.44	3.39	0.00378	17.9225	0.00677191
6/19/2018 6:25:00 AM.000	593.7	0.66	14.63	3.04	0.00448	17.9225	0.0270896
6/19/2018 6:30:00 AM.000	217.5	1.08	15.26	2.92	0.01349	17.9275	0.134049
6/19/2018 6:35:00 AM.000	90.8	1.65	16.43	3.06	0.01717	17.9275	0.204798
6/19/2018 6:40:00 AM.000	64.3	1.89	17.33	3.25	0.02688	17.9275	0.416342
6/19/2018 6:45:00 AM.000	42.9	1.43	15.72	3.31	0.0339	17.9275	0.364312
6/19/2018 6:50:00 AM.000	4	1.03	14.39	3.41	0.04229	17.9275	0.266286
6/19/2018 6:55:00 AM.000	-2.5	0.69	14.47	3.63	0.07649	17.9275	0.333419
6/19/2018 7:00:00 AM.000	-1.8	1.08	13.46	3.67	0.09541	17.9275	0.662814
6/19/2018 7:05:00 AM.000	242	1.8	12.06	3.69	0.09111	17.93	1.03156
6/19/2018 7:10:00 AM.000	636.4	1.9	12.37	3.88	0.11705	17.93	1.24287
6/19/2018 7:15:00 AM.000	697.9	1.36	12.19	4.05	0.13247	17.93	1.03552
6/19/2018 7:20:00 AM.000	710.5	0.64	11.03	4.14	0.12322	17.9325	0.421004
6/19/2018 7:25:00 AM.000	717.7	0.1	10.76	4.25	0.19297	17.9325	0.367048
6/19/2018 7:30:00 AM.000	714.8	0.04	10.06	4.23	0.2705	17.9325	0.514688
6/19/2018 7:35:00 AM.000	689.5	0.03	9.45	3.95	0.23223	17.9325	0.44181
6/19/2018 7:40:00 AM.000	383.6	0.03	19.68	3.74	0.29616	17.9325	0.563552
6/19/2018 7:45:00 AM.000	131.9	0.03	16.92	3.48	0.37685	17.935	0.717253
6/19/2018 7:50:00 AM.000	68.1	0.03	13.84	3.17	0.24924	17.9375	0.474259
6/19/2018 7:55:00 AM.000	38.5	0.03	11.93	3.06	0.26479	17.94	0.503904
6/19/2018 8:00:00 AM.000	2	0.03	12.15	2.86	0.37376	17.945	0.711537
6/19/2018 8:05:00 AM.000	-2.8	0.03	15.44	2.65	0.12266	17.945	0.233226
6/19/2018 8:10:00 AM.000	-2.6	0.03	16.08	2.54	0.0632	17.9475	0.11997
6/19/2018 8:15:00 AM.000	-2.7	0.03	14.86	2.38	0.16641	17.9525	0.31662
6/19/2018 8:20:00 AM.000	-2.7	0.03	15.66	2.23	0.01851	17.9575	0.0348449
6/19/2018 8:25:00 AM.000	8	0.03	15.96	2.06	0.00757	17.9625	0.0140012
6/19/2018 8:30:00 AM.000	376	0.04	15.21	1.82	0.00245	17.9625	0.0042443
6/19/2018 8:35:00 AM.000	660.2	0.33	15.75	1.62	0.00163	17.9675	0.00225446
6/19/2018 8:40:00 AM.000	723	0.63	16.68	1.51	0.00585	17.97	0.04457
6/19/2018 8:45:00 AM.000	732.5	0.99	17.31	1.47	0.01517	17.97	0.144497
6/19/2018 8:50:00 AM.000	717	1.6	18.01	1.5	0.01749	17.9725	0.168435
6/19/2018 8:55:00 AM.000	700.9	1.69	19.51	1.65	0.02705	17.9725	0.267883
6/19/2018 9:00:00 AM.000	708	1.29	19.85	1.83	0.04365	17.975	0.307541
6/19/2018 9:05:00 AM.000	694.1	0.67	19.85	1.89	0.0423	17.9775	0.157014
6/19/2018 9:10:00 AM.000	664.1	0.79	19.86	2.04	0.0715	17.9775	0.379899
6/19/2018 9:15:00 AM.000	395.8	1.32	19.86	2.15	0.11149	17.9775	0.972841
6/19/2018 9:20:00 AM.000	143	1.7	19.86	2.17	0.09466	17.9775	0.944887
6/19/2018 9:25:00 AM.000	74.7	1.65	19.85	2.32	0.0917	17.9825	0.945924
6/19/2018 9:30:00 AM.000	48.7	0.93	19.86	2.54	0.12424	17.9875	0.814582
6/19/2018 9:35:00 AM.000	104.3	0.82	19.85	2.62	0.11702	17.9925	0.512744
6/19/2018 9:40:00 AM.000	518.8	1.48	19.86	2.62	0.09679	17.995	0.562447
6/19/2018 9:45:00 AM.000	683.4	1.34	19.86	2.9	0.13468	17.9975	0.929051
6/19/2018 9:50:00 AM.000	715.5	0.77	19.86	3.09	0.14042	18.0025	0.716636
6/19/2018 9:55:00 AM.000	713.3	0.2	19.85	3.12	0.11858	18.0075	0.0195842
6/19/2018 10:00:00 AM.000	715.9	0.05	19.85	3.14	0.19425	18.01	0.370166
6/19/2018 10:05:00 AM.000	700	0.03	19.85	2.96	0.19831	18.01	0.377912
6/19/2018 10:10:00 AM.000	698.4	0.03	19.85	2.54	0.0277	18.02	0.0524342
6/19/2018 10:15:00 AM.000	688.7	0.03	19.85	2.33	0.00741	18.02	0.0137157
6/19/2018 10:20:00 AM.000	691.2	0.04	19.85	2.03	0.00396	18.025	0.00713315
6/19/2018 10:25:00 AM.000	606.8	0.26	19.85	1.65	0.00148	18.0275	0.00261149
6/19/2018 10:30:00 AM.000	230.9	0.63	19.86	1.48	0.00343	18.0325	0.0255873
6/19/2018 10:35:00 AM.000	95.8	0.77	19.86	1.44	0.00818	18.0375	0.0567782
6/19/2018 10:40:00 AM.000	59	0.96	19.85	1.39	0.01362	18.04	0.113109
6/19/2018 10:45:00 AM.000	90.7	1.29	19.85	1.49	0.02305	18.045	0.264904
6/19/2018 10:50:00 AM.000	479.6	1.82	19.85	1.66	0.03521	18.0475	0.459459
6/19/2018 10:55:00 AM.000	676.4	1.66	19.86	1.71	0.04497	18.055	0.472392
6/19/2018 11:00:00 AM.000	719.5	0.8	19.85	1.83	0.05769	18.0625	0.341844
6/19/2018 11:05:00 AM.000	723.3	0.86	19.85	1.99	0.0794	18.07	0.479045
6/19/2018 11:10:00 AM.000	719.4	1.26	19.86	2.02	0.09587	18.08	0.686823
6/19/2018 11:15:00 AM.000	707.9	0.15	19.85	2.12	0.15477	18.085	0.333415
6/19/2018 11:20:00 AM.000	708.3	0.04	19.86	2.17	0.19499	18.0925	0.372306
6/19/2018 11:25:00 AM.000	692.3	0.03	19.86	1.88	0.22143	18.0975	0.422898
6/19/2018 11:30:00 AM.000	681.1	0.03	19.86	1.55	0.2592	18.1	0.495134
6/19/2018 11:35:00 AM.000	666.9	0.03	19.85	1.37	0.22214	18.105	0.424331
6/19/2018 11:40:00 AM.000	660.1	0.03	19.86	1.16	0.15996	18.115	0.305508
6/19/2018 11:45:00 AM.000	659.2	0.03	19.85	0.74	0.087	18.125	0.166008
6/19/2018 11:50:00 AM.000	658.3	0.03	19.85	0.49	0.00452	18.135	0.00822463
6/19/2018 11:55:00 AM.000	648.3	0.12	19.85	0.17	0.00108	18.1375	0.00164244
6/19/2018 12:00:00 PM.000	649.6	0.67	19.86	0.01	0.00136	18.145	0.0108703
6/19/2018 12:05:00 PM.000	653.6	0.95	19.86	0	0.00473	18.1525	0.054437
6/19/2018 12:10:00 PM.000	650.8	1.07	19.86	0	0.01005	18.1575	0.105155
6/19/2018 12:15:00 PM.000	647.5	0.74	19.85	0	0.01615	18.1675	0.134331
6/19/2018 12:20:00 PM.000	654.1	0.88	19.86	0.02	0.03767	18.175	0.377199
6/19/2018 12:25:00 PM.000	656.5	1.58	19.85	0.11	0.04774	18.18	0.689547
6/19/2018 12:30:00 PM.000	650	2.08	19.86	0.26	0.05377	18.1875	0.987213
6/19/2018 12:35:00 PM.000	654.2	1.82	19.85	0.43	0.05983	18.1975	0.679472
6/19/2018 12:40:00 PM.000	649.9	0.78	19.86	0.62	0.06938	18.2075	0.390104
6/19/2018 12:45:00 PM.000	651.1	0.08	19.86	0.77	0.12769	18.2175	0.0549816
6/19/2018 12:50:00 PM.000	646	0.04	19.85	0.64	0.15316	18.225	0.293268
6/19/2018 12:55:00 PM.000	635.2	0.03	19.85	0.38	0.17399	18.235	0.33329
6/19/2018 1:00:00 PM.000	638.1	0.03	19.85	0.08	0.17921	18.2375	0.343323
6/19/2018 1:05:00 PM.000	629.3	0.03	19.86	0	0.01508	18.25	0.0285098
6/19/2018 1:10:00 PM.000	630.1	0.09	19.86	0	0	18.2575	-0.000424001
6/19/2018 1:15:00 PM.000	623.9	0.86	19.86	0	0	18.2625	0
6/19/2018 1:20:00 PM.000	620.4	1.27	19.85	0	0.00023	18.27	0.00336608
6/19/2018 1:25:00 PM.000	629.8	1.43	19.85	0	0.00753	18.2775	0.100516
6/19/2018 1:30:00 PM.000	632.5	1.31	19.85	0	0.01313	18.2875	0.148659
6/19/2018 1:35:00 PM.000	633	1.49	19.86	0.01	0.01409	18.295	0.171926
6/19/2018 1:40:00 PM.000	644.5	1.32	19.47	0.18	0.03251	18.3025	0.340799
6/19/2018 1:45:00 PM.000	656.5	1.19	17.49	0.34	0.05216	18.3125	0.464216
6/19/2018 1:50:00 PM.000	652	1.16	16.84	0.48	0.0575	18.3225	0.432454
6/19/2018 1:55:00 PM.000	638.2	1.08	16.98	0.56	0.07291	18.3325	0.48087
6/19/2018 2:00:00 PM.000	633.7	1.28	17.1	0.67	0.09431	18.3425	0.889261
6/19/2018 2:05:00 PM.000	629.7	1.47	16.88	0.82	0.10096	18.3525	1.34749
6/19/2018 2:10:00 PM.000	628.8	0.19	16.66	0.96	0.15855	18.36	0.615564
6/19/2018 2:15:00 PM.000	623.8	0.04	16.31	0.97	0.19654	18.3725	0.377773
6/19/2018 2:20:00 PM.000	623.3	0.03	17.97	0.75	0.22544	18.38	0.433462
6/19/2018 2:25:00 PM.000	625.6	0.03	20.1	0.41	0.25006	18.3875	0.480931
6/19/2018 2:30:00 PM.000	632.8	0.03	20.1	0.21	0.17725	18.3925	0.340816
6/19/2018 2:35:00 PM.000	621.3	0.09	20.1	0.03	0.1775	18.405	0.341398
6/19/2018 2:40:00 PM.000	609.9	0.3	20.1	0	0.13896	18.4125	0.868569
6/19/2018 2:45:00 PM.000	631.9	0.43	20.1	0	0.00253	18.4225	0.0255888
6/19/2018 2:50:00 PM.000	637.2	0.71	20.1	0	0.0036	18.4275	0.0400149
6/19/2018 2:55:00 PM.000	629.5	0.94	20.1	0	0.031	18.4325	0.434909
6/19/2018 3:00:00 PM.000	613.1	1.21	17.8	0	0.01235	18.4375	0.231857
6/19/2018 3:05:00 PM.000	620.3	1.98	20.1	0	0.01543	18.4425	0.315809
6/19/2018 3:10:00 PM.000	620.5	2.56	20.1	0.02	0.03141	18.4525	0.486454
6/19/2018 3:15:00 PM.000	618	1.92	20.1	0.17	0.04096	18.4625	0.647914
6/19/2018 3:20:00 PM.000	614.9	1.27	20.1	0.35	0.05303	18.4675	0.689662
6/19/2018 3:25:00 PM.000	619.2	0.94	20.05	0.58	0.08522	18.48	1.01649
6/19/2018 3:30:00 PM.000	615.3	1.34	20.05	0.64	0.09309	18.485	1.14632
6/19/2018 3:35:00 PM.000	627.5	2.07	20.06	0.74	0.1027	18.49	1.43914
6/19/2018 3:40:00 PM.000	621.5	1.8	19.22	0.92	0.12808	18.4975	1.96381
6/19/2018 3:45:00 PM.000	635.1	0.91	14.85	1.08	0.13815	18.51	0.891846
6/19/2018 3:50:00 PM.000	641.8	0.76	12.57	1.18	0.15936	18.515	0.664153
6/19/2018 3:55:00 PM.000	647.8	0.84	12.84	1.31	0.19387	18.52	1.024
6/19/2018 4:00:00 PM.000	641.9	1.34	14.26	1.38	0.22067	18.5275	2.25578
6/19/2018 4:05:00 PM.000	645.7	2	13.73	1.38	0.20951	18.535	2.55008
6/19/2018 4:10:00 PM.000	636.8	1.65	13.61	1.56	0.22057	18.535	2.20974
6/19/2018 4:15:00 PM.000	619.4	0.94	13.16	1.75	0.23686	18.5425	1.46277
6/19/2018 4:20:00 PM.000	604.1	1.4	11.86	1.84	0.23505	18.55	1.42971
6/19/2018 4:25:00 PM.000	627.1	1.42	10.26	1.99	0.2427	18.5525	2.06587
6/19/2018 4:30:00 PM.000	628.5	0.92	8.05	2.21	0.26475	18.56	1.67319
6/19/2018 4:35:00 PM.000	618.2	0.97	7.16	2.29	0.25726	18.565	1.76514
6/19/2018 4:40:00 PM.000	615.2	0.23	8.42	2.36	0.3076	18.5675	1.30043
6/19/2018 4:45:00 PM.000	619.7	0.04	9.26	2.37	0.40359	18.57	0.77984
6/19/2018 4:50:00 PM.000	617.8	0.03	9.07	2.14	0.41254	18.575	0.797238
6/19/2018 4:55:00 PM.000	623.4	0.03	9.24	1.83	0.46671	18.5775	0.902031
6/19/2018 5:00:00 PM.000	621.9	0.03	10.96	1.65	0.51839	18.5825	1.00208
6/19/2018 5:05:00 PM.000	637.3	0.06	12.16	1.36	0.50947	18.585	0.98489
6/19/2018 5:10:00 PM.000	642	0.71	12.51	1.02	0.51358	18.5875	2.39011
6/19/2018 5:15:00 PM.000	636.8	1.19	12.76	0.97	0.51803	18.59	7.52114
6/19/2018 5:20:00 PM.000	622.5	1.62	13.88	1.08	0.46444	18.5925	7.65781
6/19/2018 5:25:00 PM.000	627.1	1.98	14.67	1.15	0.45286	18.595	8.47909
6/19/2018 5:30:00 PM.000	616.3	1.21	13.7	1.3	0.48059	18.5975	5.1192
6/19/2018 5:35:00 PM.000	611.3	0.47	12.32	1.41	1.02953	18.6	4.79129
6/19/2018 5:40:00 PM.000	619.5	0.59	12.16	1.42	0.51686	18.6025	3.95722
6/19/2018 5:45:00 PM.000	620.2	0.98	12.68	1.44	0.50883	18.605	5.68767
6/19/2018 5:50:00 PM.000	621.5	1.34	14.47	1.54	0.51153	18.605	6.77675
6/19/2018 5:55:00 PM.000	616.4	1.62	15.95	1.68	0.49666	18.6075	6.27853
6/19/2018 6:00:00 PM.000	603.8	1.88	14.63	1.73	0.48517	18.6075	5.07482
6/19/2018 6:05:00 PM.000	620.6	1.79	13.88	1.86	0.48029	18.6075	5.05456
6/19/2018 6:10:00 PM.000	637.3	1.82	13.74	2.16	0.46773	18.6075	6.25683
6/19/2018 6:15:00 PM.000	628.2	1.8	12.79	2.31	0.46264	18.61	4.89081
6/19/2018 6:20:00 PM.000	627.9	1.15	11.55	2.4	0.45376	18.6075	2.44594
6/19/2018 6:25:00 PM.000	640.6	0.87	11.22	2.61	0.46466	18.605	2.70378
6/19/2018 6:30:00 PM.000	629.7	1.44	10.83	2.69	0.46518	18.6075	4.06367
6/19/2018 6:35:00 PM.000	625.1	0.62	10.08	2.76	0.47513	18.605	3.983
6/19/2018 6:40:00 PM.000	614.5	0.06	9.86	2.82	0.77242	18.6	1.49397
6/19/2018 6:45:00 PM.000	627.1	0.04	9.77	2.67	0.59609	18.605	1.15296
6/19/2018 6:50:00 PM.000	627.7	0.03	9.9	2.39	0.62576	18.6075	1.21044
6/19/2018 6:55:00 PM.000	614	0.03	11.33	2.17	0.67874	18.6	1.31272
6/19/2018 7:00:00 PM.000	604.5	0.03	13.16	2.06	0.69767	18.5975	1.34927
6/19/2018 7:05:00 PM.000	620.5	0.03	13.94	1.66	0.69995	18.5975	1.35368
6/19/2018 7:10:00 PM.000	615	0.05	15.25	1.45	0.69232	18.595	1.33884
6/19/2018 7:15:00 PM.000	606	0.21	16.66	1.28	0.69274	18.595	4.24578
6/19/2018 7:20:00 PM.000	623.1	0.56	17.74	1.11	0.66279	18.5925	7.83064
6/19/2018 7:25:00 PM.000	628.4	0.98	19.21	1.02	0.6024	18.5875	7.4279
6/19/2018 7:30:00 PM.000	630.5	1.67	20.04	1.11	0.5766	18.585	8.56536
6/19/2018 7:35:00 PM.000	633	1.99	20.1	1.16	0.55864	18.585	7.21666
6/19/2018 7:40:00 PM.000	618.5	1.38	20.1	1.28	0.53406	18.585	7.25369
6/19/2018 7:45:00 PM.000	621.6	0.93	20.1	1.43	0.53365	18.58	7.71848
6/19/2018 7:50:00 PM.000	620.2	1.06	20.1	1.5	0.54852	18.5775	8.81113
6/19/2018 7:55:00 PM.000	603.8	1.53	20.1	1.55	0.53414	18.575	8.02993
6/19/2018 8:00:00 PM.000	608.4	1.61	20.1	1.68	0.51657	18.5725	5.08598
6/19/2018 8:05:00 PM.000	616.9	1.34	20.1	1.87	0.53972	18.57	4.55715
6/19/2018 8:10:00 PM.000	607.4	1.61	20.11	2.01	0.53769	18.5625	6.67027
6/19/2018 8:15:00 PM.000	604	2.3	20.1	2.1	0.49524	18.5625	6.5857
6/19/2018 8:20:00 PM.000	600.8	1.92	20.1	2.32	0.50682	18.5575	4.68411
6/19/2018 8:25:00 PM.000	605.5	1.12	19.86	2.51	0.52068	18.5575	3.19819
6/19/2018 8:30:00 PM.000	622.5	0.89	18.86	2.6	0.51176	18.555	3.04093
6/19/2018 8:35:00 PM.000	611.4	1.22	18.92	2.71	0.51981	18.5475	3.19128
6/19/2018 8:40:00 PM.000	621	1.15	19.86	2.87	0.54436	18.5425	4.73575
6/19/2018 8:45:00 PM.000	637.3	1.74	19.68	2.98	0.52345	18.5375	5.35484
6/19/2018 8:50:00 PM.000	629.7	1.7	19.81	3.07	0.49949	18.5325	4.62244
6/19/2018 8:55:00 PM.000	626	1.27	20.1	3.26	0.52201	18.5275	3.35563
6/19/2018 9:00:00 PM.000	614.9	0.85	20.1	3.37	0.52478	18.53	3.27809
6/19/2018 9:05:00 PM.000	609.2	0.1	20.1	3.44	0.55891	18.525	0.249894
6/19/2018 9:10:00 PM.000	609.6	0.04	20.1	3.42	0.66563	18.52	1.28492
6/19/2018 9:15:00 PM.000	598.1	0.04	20.1	3.19	0.69596	18.5175	1.34341
6/19/2018 9:20:00 PM.000	588.2	0.03	20.1	2.89	0.73022	18.515	1.40948
6/19/2018 9:25:00 PM.000	591.8	0.03	20.1	2.73	0.80465	18.505	1.55282
6/19/2018 9:30:00 PM.000	595	0.03	20.1	2.52	0.82854	18.5075	1.59903
6/19/2018 9:35:00 PM.000	585.9	0.03	20.1	2.19	0.83964	18.5025	1.62026
6/19/2018 9:40:00 PM.000	595.8	0.29	20.1	1.98	0.83965	18.4925	1.35508
6/19/2018 9:45:00 PM.000	612.6	0.69	20.1	1.78	0.83744	18.4875	8.86133
6/19/2018 9:50:00 PM.000	620.2	0.82	20.1	1.74	0.78846	18.485	10.6102
6/19/2018 9:55:00 PM.000	619.9	1.09	20.1	1.75	0.76973	18.4775	9.50141
6/19/2018 10:00:00 PM.000	607.5	1.32	20.1	1.81	0.75556	18.4725	10.0843
6/19/2018 10:05:00 PM.000	616	1.5	20.1	1.91	0.72806	18.47	11.7203
6/19/2018 10:10:00 PM.000	614.6	1.81	20.1	2.05	0.68478	18.465	13.1332
6/19/2018 10:15:00 PM.000	582.2	2.27	20.1	2.15	0.65925	18.4575	8.59518
6/19/2018 10:20:00 PM.000	592.1	1.01	20.1	2.25	0.68917	18.455	5.52133
6/19/2018 10:25:00 PM.000	609.4	0.6	20.1	2.38	0.68018	18.455	3.56279
6/19/2018 10:30:00 PM.000	616	0.83	20.1	2.45	0.70113	18.45	5.35428
6/19/2018 10:35:00 PM.000	619.8	1.13	20.1	2.57	0.71676	18.4425	6.76787
6/19/2018 10:40:00 PM.000	617.5	1.44	20.1	2.7	0.71224	18.435	8.67608
6/19/2018 10:45:00 PM.000	637.2	1.99	20.1	2.8	0.67786	18.43	10.3638
6/19/2018 10:50:00 PM.000	636.1	2.28	20.1	2.98	0.66293	18.4275	9.496
6/19/2018 10:55:00 PM.000	625.7	1.55	20.1	3.17	0.67169	18.42	5.84653
6/19/2018 11:00:00 PM.000	619.7	1.23	20.1	3.29	0.65827	18.415	3.4494
6/19/2018 11:05:00 PM.000	623.5	0.72	20.1	3.43	0.66401	18.4125	3.12296
6/19/2018 11:10:00 PM.000	629.9	1.08	20.1	3.51	0.69678	18.4075	4.90058
6/19/2018 11:15:00 PM.000	623.7	2.03	20.1	3.54	0.65793	18.4	8.33039
6/19/2018 11:20:00 PM.000	623.7	1.93	20.1	3.65	0.65032	18.3975	8.26429
6/19/2018 11:25:00 PM.000	620.7	1.43	20.1	3.87	0.65051	18.39	4.28795
6/19/2018 11:30:00 PM.000	609.7	1.05	20.1	4.04	0.64456	18.3925	3.30445
6/19/2018 11:35:00 PM.000	607.7	0.25	20.1	4.15	0.67473	18.3875	2.08621
6/19/2018 11:40:00 PM.000	606.1	0.05	20.1	4.15	0.78184	18.38	1.50432
6/19/2018 11:45:00 PM.000	610.3	0.04	20.1	3.96	0.81289	18.38	1.56408
6/19/2018 11:50:00 PM.000	618.5	0.04	19.82	3.66	0.85666	18.3725	1.64802
6/19/2018 11:55:00 PM.000	600.3	0.03	19.99	3.48	0.92458	18.3675	1.77851
6/20/2018 12:00:00 AM.000	593.5	0.03	20.1	3.23	0.94344	18.3625	1.81458
6/20/2018 12:05:00 AM.000	620.8	0.03	20.1	2.89	0.96656	18.3625	1.85906
6/20/2018 12:10:00 AM.000	623.6	0.03	20.1	2.66	0.98632	18.3575	1.89685
6/20/2018 12:15:00 AM.000	618	0.33	20.1	2.4	0.95351	18.3475	1.8333
6/20/2018 12:20:00 AM.000	622.4	1.08	20.1	2.11	0.93238	18.3425	8.26923
6/20/2018 12:25:00 AM.000	623.4	0.71	20.1	2.14	0.90862	18.335	12.6936
6/20/2018 12:30:00 AM.000	628.1	1	20.1	2.18	0.86483	18.3275	12.3737
6/20/2018 12:35:00 AM.000	618.4	1.32	20.1	2.17	0.84873	18.325	12.2751
6/20/2018 12:40:00 AM.000	600.7	1.62	20.1	2.29	0.81433	18.32	13.0842
6/20/2018 12:45:00 AM.000	610	2.13	20.1	2.44	0.75745	18.315	11.461
6/20/2018 12:50:00 AM.000	599.6	1.62	20.1	2.57	0.75786	18.3125	9.78777
6/20/2018 12:55:00 AM.000	592.7	1.03	20.1	2.68	0.7751	18.31	8.94375
6/20/2018 1:00:00 AM.000	605.4	0.73	20.1	2.75	0.79927	18.3025	10.4642
6/20/2018 1:05:00 AM.000	603.1	1.23	20.1	2.73	0.77644	18.2975	12.2301
6/20/2018 1:10:00 AM.000	605.4	1.55	20.1	2.73	0.77254	18.2925	11.852
6/20/2018 1:15:00 AM.000	608	2.01	20.1	2.83	0.73829	18.29	10.8666
6/20/2018 1:20:00 AM.000	603.4	2.14	20.1	3.01	0.72274	18.2825	7.85163
6/20/2018 1:25:00 AM.000	617.4	1.87	20.1	3.25	0.72847	18.2775	12.2552
6/20/2018 1:30:00 AM.000	621.6	1.88	20.1	3.38	0.72832	18.2725	10.5645
6/20/2018 1:35:00 AM.000	610.5	1.26	20.1	3.47	0.69442	18.27	3.48955
6/20/2018 1:40:00 AM.000	605.7	0.83	20.1	3.65	0.74107	18.265	4.03462
6/20/2018 1:45:00 AM.000	614.8	1.28	20.1	3.73	0.76411	18.26	5.94648
6/20/2018 1:50:00 AM.000	604	1.55	20.1	3.78	0.74097	18.255	6.10529
6/20/2018 1:55:00 AM.000	597.3	1.43	19.96	3.89	0.74412	18.25	6.39715
6/20/2018 2:00:00 AM.000	584.1	1.39	19.54	4	0.76916	18.245	6.73273
6/20/2018 2:05:00 AM.000	588.3	1.29	17.93	4.13	0.75211	18.24	5.90711
6/20/2018 2:10:00 AM.000	598.9	1.27	16.79	4.21	0.74339	18.235	4.8389
6/20/2018 2:15:00 AM.000	585.6	1.43	16.69	4.3	0.76383	18.23	5.7217
6/20/2018 2:20:00 AM.000	582.5	1.62	16.21	4.43	0.74765	18.225	7.23261
6/20/2018 2:25:00 AM.000	592.3	1.47	15.12	4.52	0.72371	18.2225	6.38
6/20/2018 2:30:00 AM.000	586.3	1.37	14.6	4.6	0.73127	18.22	4.39557
6/20/2018 2:35:00 AM.000	592.9	1.13	13.7	4.74	0.7332	18.215	3.68288
6/20/2018 2:40:00 AM.000	595.7	0.62	12.62	4.82	0.73694	18.2125	3.81229
6/20/2018 2:45:00 AM.000	601.3	0.07	11.86	4.85	0.82736	18.205	0.30891
6/20/2018 2:50:00 AM.000	604.7	0.04	11.47	4.74	0.9044	18.1975	1.73268
6/20/2018 2:55:00 AM.000	592	0.04	11.29	4.51	0.92874	18.1925	1.77911
6/20/2018 3:00:00 AM.000	576.1	0.04	11.93	4.26	0.99129	18.19	1.89885
6/20/2018 3:05:00 AM.000	580.1	0.03	14.44	4.04	1.03663	18.185	1.98548
6/20/2018 3:10:00 AM.000	579.2	0.03	15.46	3.78	1.05368	18.1825	2.01803
6/20/2018 3:15:00 AM.000	566.8	0.03	15.8	3.49	1.09044	18.18	2.08832
6/20/2018 3:20:00 AM.000	571.2	0.03	17.61	3.25	1.09402	18.175	2.09493
6/20/2018 3:25:00 AM.000	577.7	0.03	18.66	3.01	1.08494	18.17	2.07729
6/20/2018 3:30:00 AM.000	577.5	0.03	19.14	2.66	1.0924	18.1675	2.09146
6/20/2018 3:35:00 AM.000	574.5	0.22	19.97	2.41	1.05149	18.1625	2.01288
6/20/2018 3:40:00 AM.000	559.8	0.82	20.1	2.13	1.00682	18.16	7.07531
6/20/2018 3:45:00 AM.000	582.6	0.64	20.1	2.06	0.98972	18.16	11.2824
6/20/2018 3:50:00 AM.000	591.9	0.7	20.1	2.08	0.94855	18.155	11.0695
6/20/2018 3:55:00 AM.000	577.8	1.02	20.1	2.07	0.91684	18.15	12.7806
6/20/2018 4:00:00 AM.000	582.3	1.2	20.1	2.06	0.89418	18.1475	14.1955
6/20/2018 4:05:00 AM.000	587.7	1.47	20.1	2.11	0.84584	18.1475	15.9065
6/20/2018 4:10:00 AM.000	568.4	1.9	20.1	2.2	0.80358	18.1425	13.9932
6/20/2018 4:15:00 AM.000	531.6	1.8	20.1	2.37	0.78631	18.1375	9.84536
6/20/2018 4:20:00 AM.000	266.8	1.13	20.1	2.49	0.79459	18.135	10.7639
6/20/2018 4:25:00 AM.000	113.7	1.16	20.1	2.54	0.78007	18.1325	12.7938
6/20/2018 4:30:00 AM.000	72.9	1.84	20.1	2.62	0.74923	18.13	9.85346
6/20/2018 4:35:00 AM.000	45.4	1.84	20.1	2.8	0.7533	18.13	8.06208
6/20/2018 4:40:00 AM.000	24.1	1.81	20.1	2.98	0.74738	18.1275	8.72787
6/20/2018 4:45:00 AM.000	25.1	1.79	20.06	3.07	0.71646	18.125	7.67384
6/20/2018 4:50:00 AM.000	-2.7	1.18	19.99	3.23	0.7206	18.1275	4.74148
6/20/2018 4:55:00 AM.000	-0.5	0.76	19.76	3.43	0.76355	18.1225	2.84496
6/20/2018 5:00:00 AM.000	-2.8	1.2	18.24	3.45	0.74676	18.12	4.67653
6/20/2018 5:05:00 AM.000	-2.5	1.62	17.49	3.51	0.74347	18.12	6.4602
6/20/2018 5:10:00 AM.000	39.4	1.55	17.66	3.7	0.74942	18.12	5.99456
6/20/2018 5:15:00 AM.000	473.9	1.34	16.79	3.83	0.7438	18.12	5.06904
6/20/2018 5:20:00 AM.000	657	1.32	15.45	3.94	0.7331	18.1175	4.6263
6/20/2018 5:25:00 AM.000	687.1	1.26	14.9	4.07	0.74702	18.1125	4.37358
6/20/2018 5:30:00 AM.000	676.4	1.16	14.32	4.22	0.75317	18.1125	3.14392
6/20/2018 5:35:00 AM.000	654.7	0.97	13.22	4.29	0.74515	18.11	3.43351
6/20/2018 5:40:00 AM.000	590.2	1.33	12.76	4.4	0.76072	18.1025	4.88306
6/20/2018 5:45:00 AM.000	253.5	1.81	12.32	4.54	0.74166	18.0975	7.09547
6/20/2018 5:50:00 AM.000	110.4	1.96	11.61	4.64	0.7177	18.0975	6.21602
6/20/2018 5:55:00 AM.000	65	1.51	11.13	4.81	0.71426	18.095	2.23864
6/20/2018 6:00:00 AM.000	32.5	1.02	10.61	5	0.72757	18.095	3.15162
6/20/2018 6:05:00 AM.000	212.2	1.27	9.86	5.13	0.69141	18.095	3.75106
6/20/2018 6:10:00 AM.000	615.1	1.48	9.25	5.25	0.69601	18.095	4.18829
6/20/2018 6:15:00 AM.000	699.4	0.81	8.99	5.38	0.75576	18.0875	3.94152
6/20/2018 6:20:00 AM.000	714.2	0.94	8.73	5.36	0.70337	18.09	4.08561
6/20/2018 6:25:00 AM.000	724.4	1.27	8.8	5.39	0.69441	18.085	6.45144
6/20/2018 6:30:00 AM.000	698.7	1.28	8.5	5.55	0.79148	18.085	8.7852
6/20/2018 6:35:00 AM.000	403.3	1.55	8.37	5.57	0.76796	18.0825	8.07055
6/20/2018 6:40:00 AM.000	137	2	8.96	5.53	0.6682	18.08	5.82325
6/20/2018 6:45:00 AM.000	75.3	1.67	11.7	5.77	0.75359	18.08	7.67569
6/20/2018 6:50:00 AM.000	54.9	0.89	12.38	5.98	0.82804	18.08	4.25867
6/20/2018 6:55:00 AM.000	15.3	1.46	10.72	5.89	0.70353	18.0775	4.37209
6/20/2018 7:00:00 AM.000	9.9	2.02	9.42	5.98	0.69683	18.08	4.57215
6/20/2018 7:05:00 AM.000	-2.3	0.29	10.08	6.36	0.85952	18.08	1.47843
6/20/2018 7:10:00 AM.000	17.2	0.05	9.48	6.29	0.81394	18.08	1.55499
6/20/2018 7:15:00 AM.000	9.2	0.05	8.48	6.08	0.81099	18.0775	1.54926
6/20/2018 7:20:00 AM.000	-2.5	0.04	8.75	6.2	1.01956	18.0775	1.94781
6/20/2018 7:25:00 AM.000	-2.7	0.04	8.71	6.04	0.98487	18.0775	1.88152
6/20/2018 7:30:00 AM.000	137.9	0.04	8.33	5.79	0.97524	18.075	1.86301
6/20/2018 7:35:00 AM.000	602.2	0.03	8.69	5.82	1.14795	18.0725	2.19288
6/20/2018 7:40:00 AM.000	700.7	0.03	8.82	5.71	1.127	18.0725	2.15286
6/20/2018 7:45:00 AM.000	729.2	0.03	8.55	5.45	1.12228	18.0675	2.14358
6/20/2018 7:50:00 AM.000	712.4	0.03	8.7	5.43	1.25919	18.0675	2.40514
6/20/2018 7:55:00 AM.000	686.8	0.03	8.8	5.34	1.25605	18.0675	2.39914
6/20/2018 8:00:00 AM.000	684.2	0.03	8.67	5.13	1.24228	18.0675	2.37283
6/20/2018 8:05:00 AM.000	425	0.03	8.87	5.08	1.35585	18.065	2.58964
6/20/2018 8:10:00 AM.000	152.7	0.03	9.09	4.93	1.35775	18.0625	2.59312
6/20/2018 8:15:00 AM.000	81.5	0.03	9.07	4.75	1.33368	18.0625	2.54714
6/20/2018 8:20:00 AM.000	43.3	0.03	9.32	4.66	1.42578	18.0625	2.72307
6/20/2018 8:25:00 AM.000	34	0.03	9.52	4.56	1.42768	18.0625	2.7267
6/20/2018 8:30:00 AM.000	16	0.03	9.67	4.37	1.41884	18.0625	2.70981
6/20/2018 8:35:00 AM.000	26.4	0.03	10.08	4.25	1.4985	18.0625	2.86198
6/20/2018 8:40:00 AM.000	442.3	0.03	10.37	4.11	1.4995	18.065	2.86406
6/20/2018 8:45:00 AM.000	689.3	0.03	10.65	3.95	1.42179	18.065	2.71561
6/20/2018 8:50:00 AM.000	719	0.03	10.92	3.81	1.44002	18.065	2.75043
6/20/2018 8:55:00 AM.000	714.1	0.03	11.2	3.55	1.40529	18.065	2.68409
6/20/2018 9:00:00 AM.000	697	0.03	11.3	3.29	1.15048	18.065	2.19733
6/20/2018 9:05:00 AM.000	680.9	0.03	11.3	3.04	0.99597	18.0625	1.90206
6/20/2018 9:10:00 AM.000	402	0.03	11.3	2.75	0.86372	18.0625	1.64943
6/20/2018 9:15:00 AM.000	143.2	0.03	11.3	2.47	0.59406	18.0625	1.13434
6/20/2018 9:20:00 AM.000	62.7	0.03	11.3	2.23	0.45375	18.0625	0.866319
6/20/2018 9:25:00 AM.000	49.2	0.03	11.3	2.04	0.36276	18.0625	0.692512
6/20/2018 9:30:00 AM.000	49.3	0.03	11.3	1.84	0.15218	18.0625	0.290267
6/20/2018 9:35:00 AM.000	378.7	0.03	11.3	1.68	0.06048	18.0675	0.115117
6/20/2018 9:40:00 AM.000	661.8	0.03	11.3	1.49	0.01407	18.07	0.0264566
6/20/2018 9:45:00 AM.000	723.3	0.03	11.3	1.31	0.0047	18.07	0.00855508
6/20/2018 9:50:00 AM.000	722.9	0.07	11.3	0.99	0.00354	18.075	0.0063397
6/20/2018 9:55:00 AM.000	726.2	0.49	11.3	0.7	0.00311	18.075	0.0205156
6/20/2018 10:00:00 AM.000	721.3	1.15	11.3	0.57	0.00607	18.08	0.0626047
6/20/2018 10:05:00 AM.000	715.8	1.54	11.3	0.62	0.00824	18.0825	0.0875553
6/20/2018 10:10:00 AM.000	698	1.36	11.3	0.74	0.01234	18.0825	0.116505
6/20/2018 10:15:00 AM.000	680.1	1.04	11.3	0.82	0.02262	18.09	0.13124
6/20/2018 10:20:00 AM.000	500.9	0.7	11.3	0.93	0.03962	18.09	0.178582
6/20/2018 10:25:00 AM.000	185.6	0.87	11.3	1.07	0.05787	18.09	0.30905
6/20/2018 10:30:00 AM.000	81.7	1.29	11.3	1.15	0.07482	18.0925	0.722189
6/20/2018 10:35:00 AM.000	76.9	1.89	11.3	1.25	0.0861	18.095	1.0818
6/20/2018 10:40:00 AM.000	407.3	1.3	11.3	1.45	0.09513	18.095	0.827189
6/20/2018 10:45:00 AM.000	674.6	0.79	11.3	1.61	0.11394	18.095	0.544941
6/20/2018 10:50:00 AM.000	728.1	0.82	11.3	1.64	0.13952	18.0975	0.645833
6/20/2018 10:55:00 AM.000	718.8	0.97	11.3	1.75	0.16034	18.0975	1.27106
6/20/2018 11:00:00 AM.000	702.8	1.37	11.3	1.87	0.17598	18.1075	1.86041
6/20/2018 11:05:00 AM.000	726	1.55	11.3	1.94	0.1902	18.1075	1.8235
6/20/2018 11:10:00 AM.000	721.6	1.16	11.3	2.09	0.19771	18.1075	1.76925
6/20/2018 11:15:00 AM.000	714.6	0.93	11.3	2.24	0.22023	18.115	1.18168
6/20/2018 11:20:00 AM.000	703.5	0.11	11.3	2.33	0.29074	18.12	0.556956
6/20/2018 11:25:00 AM.000	687.7	0.04	11.3	2.29	0.34082	18.125	0.651568
6/20/2018 11:30:00 AM.000	688.2	0.04	11.3	2.04	0.37097	18.135	0.709414
6/20/2018 11:35:00 AM.000	673.3	0.03	11.3	1.73	0.41678	18.1425	0.797212
6/20/2018 11:40:00 AM.000	651.2	0.03	11.3	1.5	0.4245	18.15	0.812131
6/20/2018 11:45:00 AM.000	662.4	0.03	11.29	1.23	0.43018	18.1575	0.82315
6/20/2018 11:50:00 AM.000	650.3	0.03	11.29	0.87	0.42461	18.1625	0.812582
6/20/2018 11:55:00 AM.000	643.9	0.03	11.29	0.63	0.31882	18.1725	0.61017
6/20/2018 12:00:00 PM.000	658.5	0.51	11.29	0.36	0.30949	18.1825	0.65894
6/20/2018 12:05:00 PM.000	656.2	1.57	11.29	0.12	0.29513	18.19	3.69153
6/20/2018 12:10:00 PM.000	653.1	1.19	11.29	0.19	0.22487	18.2025	2.2931
6/20/2018 12:15:00 PM.000	644	0.6	11.29	0.26	0.20781	18.2125	1.79599
6/20/2018 12:20:00 PM.000	645.8	0.56	11.29	0.18	0.26962	18.2175	2.67797
6/20/2018 12:25:00 PM.000	668.9	0.81	11.29	0.19	0.24489	18.2275	3.15515
6/20/2018 12:30:00 PM.000	670.7	0.98	11.29	0.22	0.20551	18.2325	2.72695
6/20/2018 12:35:00 PM.000	653.6	1.13	11.29	0.27	0.2524	18.24	3.73273
6/20/2018 12:40:00 PM.000	652	1.43	11.29	0.35	0.26076	18.2475	5.05292
6/20/2018 12:45:00 PM.000	660	1.88	11.29	0.44	0.23836	18.255	5.25011
6/20/2018 12:50:00 PM.000	655.2	1.72	11.29	0.61	0.24992	18.26	3.13538
6/20/2018 12:55:00 PM.000	655.8	1.14	11.29	0.72	0.2849	18.2725	3.91692
6/20/2018 1:00:00 PM.000	650.6	1.15	14.04	0.78	0.28593	18.285	3.95039
6/20/2018 1:05:00 PM.000	652.5	1.83	20.09	0.86	0.2949	18.295	4.48454
6/20/2018 1:10:00 PM.000	660.5	1.97	20.09	1.03	0.32317	18.3025	5.26834
6/20/2018 1:15:00 PM.000	641.4	1.22	14.27	1.2	0.33503	18.3175	3.11833
6/20/2018 1:20:00 PM.000	635.7	0.95	6.06	1.35	0.34508	18.335	1.83131
6/20/2018 1:25:00 PM.000	646.1	0.55	2.87	1.51	0.4019	18.345	1.77904
6/20/2018 1:30:00 PM.000	636.5	0.86	1.83	1.56	0.43656	18.3525	3.25319
6/20/2018 1:35:00 PM.000	636.2	1.96	1.48	1.58	0.42711	18.365	5.57933
6/20/2018 1:40:00 PM.000	644.4	1.63	1.4	1.67	0.45762	18.3775	5.66225
6/20/2018 1:45:00 PM.000	638.2	0.95	1.5	1.92	0.47428	18.385	2.15035
6/20/2018 1:50:00 PM.000	641.9	0.55	1.81	1.99	0.5132	18.3975	2.4626
6/20/2018 1:55:00 PM.000	636.1	0.9	2.2	2.03	0.54229	18.4075	4.12927
6/20/2018 2:00:00 PM.000	624.2	1.64	2.69	2.1	0.55647	18.42	5.87905
6/20/2018 2:05:00 PM.000	623.2	1.53	2.78	2.18	0.56885	18.43	7.10303
6/20/2018 2:10:00 PM.000	623.3	0.98	3.41	2.3	0.57036	18.445	4.24133
6/20/2018 2:15:00 PM.000	606.8	0.91	4.61	2.44	0.61567	18.46	4.29656
6/20/2018 2:20:00 PM.000	609	1.39	6.18	2.48	0.62096	18.47	5.38639
6/20/2018 2:25:00 PM.000	605	0.97	6.51	2.57	0.65973	18.48	6.64884
6/20/2018 2:30:00 PM.000	609.6	0.08	7.01	2.67	0.75784	18.495	0.804744
6/20/2018 2:35:00 PM.000	612.7	0.04	7.37	2.58	0.83045	18.5025	1.60252
6/20/2018 2:40:00 PM.000	606.2	0.04	7.39	2.31	0.86867	18.5125	1.67669
6/20/2018 2:45:00 PM.000	627.9	0.03	7.6	1.99	0.93625	18.52	1.80749
6/20/2018 2:50:00 PM.000	653.5	0.03	8.01	1.73	0.98465	18.53	1.9014
6/20/2018 2:55:00 PM.000	640.7	0.03	8.6	1.43	1.01327	18.5425	1.95726
6/20/2018 3:00:00 PM.000	637.5	0.03	9.91	1.12	1.04275	18.55	2.01458
6/20/2018 3:05:00 PM.000	648.7	0.03	10.98	0.88	1.03436	18.5575	1.99872
6/20/2018 3:10:00 PM.000	633.1	0.09	10.91	0.55	1.02888	18.5675	1.9886
6/20/2018 3:15:00 PM.000	510.2	0.82	11	0.25	1.00385	18.575	7.59352
6/20/2018 3:20:00 PM.000	423.4	1.56	10.88	0.22	0.90324	18.5775	16.8614
6/20/2018 3:25:00 PM.000	497.5	2.23	9.67	0.29	0.82599	18.585	16.0396
6/20/2018 3:30:00 PM.000	656.1	1.11	7.43	0.38	0.88582	18.595	6.85445
6/20/2018 3:35:00 PM.000	684.2	0.34	3.89	0.5	0.87878	18.6025	4.68379
6/20/2018 3:40:00 PM.000	686.2	0.43	2.15	0.49	0.85272	18.6075	7.78492
6/20/2018 3:45:00 PM.000	674.8	0.47	1.49	0.38	0.88111	18.61	12.228
6/20/2018 3:50:00 PM.000	686	0.78	1.26	0.37	0.87198	18.615	12.1128
6/20/2018 3:55:00 PM.000	691.2	1.15	1.09	0.41	0.83169	18.62	12.7981
6/20/2018 4:00:00 PM.000	688.5	1.4	0.87	0.42	0.8125	18.625	12.7788
6/20/2018 4:05:00 PM.000	686.3	1.96	0.87	0.49	0.79759	18.63	12.1686
6/20/2018 4:10:00 PM.000	677.4	1.5	0.87	0.68	0.79572	18.6375	9.8311
6/20/2018 4:15:00 PM.000	651.4	1.5	0.87	0.79	0.77223	18.645	9.6566
6/20/2018 4:20:00 PM.000	647.3	1.53	0.84	0.9	0.80484	18.6525	11.409
6/20/2018 4:25:00 PM.000	657.3	1.84	0.83	1.06	0.8161	18.6625	11.9945
6/20/2018 4:30:00 PM.000	650.9	1.83	0.8	1.22	0.78657	18.6675	10.0146
6/20/2018 4:35:00 PM.000	647.7	1.09	0.73	1.37	0.82144	18.67	6.93607
6/20/2018 4:40:00 PM.000	651.1	0.83	0.7	1.54	0.88233	18.6775	6.07587
6/20/2018 4:45:00 PM.000	648.4	1.53	0.68	1.6	0.8714	18.685	9.66743
6/20/2018 4:50:00 PM.000	653	2.1	0.64	1.64	0.86584	18.6925	12.3622
6/20/2018 4:55:00 PM.000	640.4	1.12	0.63	1.83	0.91088	18.7	6.61976
6/20/2018 5:00:00 PM.000	634.5	0.69	0.63	2.03	0.95582	18.705	4.72375
6/20/2018 5:05:00 PM.000	652.9	0.9	0.59	2.07	0.97266	18.705	6.67673
6/20/2018 5:10:00 PM.000	664.4	1.51	0.58	2.16	0.99782	18.7125	11.6859
6/20/2018 5:15:00 PM.000	652.1	2.07	0.58	2.34	0.98584	18.72	14.8683
6/20/2018 5:20:00 PM.000	650	1.77	0.55	2.46	0.97918	18.7275	13.5478
6/20/2018 5:25:00 PM.000	639	1.05	0.5	2.59	1.00434	18.7275	7.11364
6/20/2018 5:30:00 PM.000	635.3	0.81	0.43	2.73	1.05394	18.7325	4.84569
6/20/2018 5:35:00 PM.000	640.7	1.25	0.42	2.81	1.05723	18.7325	9.30596
6/20/2018 5:40:00 PM.000	630.6	1.89	0.4	2.92	1.04476	18.735	12.8297
6/20/2018 5:45:00 PM.000	641.5	1.79	0.4	3.11	1.0541	18.7425	11.2621
6/20/2018 5:50:00 PM.000	638	0.86	0.4	3.32	1.09129	18.7475	6.93071
6/20/2018 5:55:00 PM.000	621.8	0.83	0.36	3.38	1.15192	18.75	5.75422
6/20/2018 6:00:00 PM.000	618.4	0.91	0.34	3.3	1.1658	18.7575	10.5731
6/20/2018 6:05:00 PM.000	631.8	0.87	0.35	3.35	1.17556	18.7625	12.7869
6/20/2018 6:10:00 PM.000	632.2	1.3	0.37	3.38	1.27687	18.7575	16.6083
6/20/2018 6:15:00 PM.000	632.4	1.51	0.39	3.37	1.26786	18.76	19.0453
6/20/2018 6:20:00 PM.000	634.4	1.74	0.39	3.38	1.2212	18.765	22.1628
6/20/2018 6:25:00 PM.000	638.3	2.18	0.41	3.57	1.24133	18.765	23.0689
6/20/2018 6:30:00 PM.000	638.8	1.96	0.42	3.74	1.27645	18.77	20.5637
6/20/2018 6:35:00 PM.000	617.6	0.76	0.42	3.82	1.3178	18.7725	8.14474
6/20/2018 6:40:00 PM.000	598	0.52	0.42	3.84	1.44588	18.775	7.45893
6/20/2018 6:45:00 PM.000	618.9	0.83	0.39	3.78	1.51542	18.775	18.0338
6/20/2018 6:50:00 PM.000	619	1.88	0.39	3.62	1.45645	18.775	26.352
6/20/2018 6:55:00 PM.000	621.8	2.48	0.41	3.71	1.41503	18.7825	21.8109
6/20/2018 7:00:00 PM.000	622.7	1.06	0.43	3.94	1.5549	18.7825	9.40761
6/20/2018 7:05:00 PM.000	614.9	0.49	0.41	4.07	1.62048	18.7825	7.24812
6/20/2018 7:10:00 PM.000	608.4	1.28	0.37	3.95	1.55161	18.785	18.7178
6/20/2018 7:15:00 PM.000	612.5	2.19	0.36	4.01	1.55251	18.7825	28.4354
6/20/2018 7:20:00 PM.000	603.4	2.23	0.36	4.27	1.58871	18.7825	20.1091
6/20/2018 7:25:00 PM.000	623.3	1.24	0.32	4.39	1.57727	18.785	11.2302
6/20/2018 7:30:00 PM.000	640.7	1.17	0.3	4.48	1.53912	18.785	9.88414
6/20/2018 7:35:00 PM.000	646.6	1.07	0.3	4.65	1.62383	18.785	12.5619
6/20/2018 7:40:00 PM.000	648.1	0.9	0.3	4.71	1.66678	18.7825	11.7086
6/20/2018 7:45:00 PM.000	655.1	0.11	0.28	4.75	1.72573	18.78	3.53506
6/20/2018 7:50:00 PM.000	632.8	0.04	0.28	4.69	1.95714	18.7725	3.80155
6/20/2018 7:55:00 PM.000	623.9	0.04	0.28	4.41	2.04829	18.775	3.97885
6/20/2018 8:00:00 PM.000	626.4	0.03	0.28	3.99	2.07538	18.775	4.03148
6/20/2018 8:05:00 PM.000	633.8	0.03	0.33	3.77	2.08099	18.7725	4.04214
6/20/2018 8:10:00 PM.000	647.6	0.03	0.36	3.44	2.08099	18.7775	4.04262
6/20/2018 8:15:00 PM.000	641	0.03	0.37	3.09	2.08099	18.78	4.04286
6/20/2018 8:20:00 PM.000	622.9	0.03	0.38	2.88	2.08099	18.7775	4.04262
6/20/2018 8:25:00 PM.000	644.4	0.03	0.4	2.57	2.08099	18.775	4.04238
6/20/2018 8:30:00 PM.000	640.7	0.03	0.42	2.15	2.08099	18.7725	4.04214
6/20/2018 8:35:00 PM.000	625.4	0.11	0.45	1.86	2.08099	18.7725	4.04214
6/20/2018 8:40:00 PM.000	631.1	0.61	0.48	1.59	2.08099	18.7775	16.2203
6/20/2018 8:45:00 PM.000	641	0.7	0.49	1.41	2.08099	18.7725	22.9988
6/20/2018 8:50:00 PM.000	651	0.84	0.52	1.39	2.08099	18.77	24.5824
6/20/2018 8:55:00 PM.000	640.2	1.28	0.52	1.47	2.08099	18.7675	31.5844
6/20/2018 9:00:00 PM.000	621.3	1.56	0.53	1.51	2.00411	18.765	34.3964
6/20/2018 9:05:00 PM.000	626.2	2.06	0.54	1.59	1.82306	18.7675	29.7032
6/20/2018 9:10:00 PM.000	630.9	1.18	0.54	1.73	1.82317	18.765	24.777
6/20/2018 9:15:00 PM.000	612.7	0.79	0.55	1.84	1.80318	18.7625	25.9826
6/20/2018 9:20:00 PM.000	627.3	1.16	0.55	1.79	1.7402	18.7625	28.4914
6/20/2018 9:25:00 PM.000	641.9	1.4	0.55	1.84	1.68693	18.7625	23.5849
6/20/2018 9:30:00 PM.000	633.9	1.57	0.55	1.96	1.67292	18.7625	23.4422
6/20/2018 9:35:00 PM.000	633.5	1.88	0.55	2.12	1.62006	18.76	26.3468
6/20/2018 9:40:00 PM.000	629.3	1.89	0.53	2.23	1.56026	18.76	23.402
6/20/2018 9:45:00 PM.000	630.9	1.09	0.5	2.37	1.58319	18.755	21.005
6/20/2018 9:50:00 PM.000	634.9	0.82	0.48	2.55	1.62007	18.755	9.228
6/20/2018 9:55:00 PM.000	623.4	1.09	0.41	2.63	1.6041	18.755	14.5158
6/20/2018 10:00:00 PM.000	628.2	1.32	0.37	2.69	1.58574	18.7525	20.9091
6/20/2018 10:05:00 PM.000	633.6	1.66	0.37	2.78	1.56398	18.7525	18.0891
6/20/2018 10:10:00 PM.000	628.2	1.75	0.36	2.98	1.5391	18.75	18.1454
6/20/2018 10:15:00 PM.000	629.8	1.03	0.35	3.12	1.58822	18.7475	12.7284
6/20/2018 10:20:00 PM.000	630.2	1.01	0.33	3.2	1.53454	18.745	11.8048
6/20/2018 10:25:00 PM.000	624.4	1.42	0.33	3.31	1.5317	18.7425	17.1599
6/20/2018 10:30:00 PM.000	619.4	1.35	0.32	3.45	1.47651	18.745	15.3679
6/20/2018 10:35:00 PM.000	621.4	1.36	0.31	3.57	1.46206	18.7425	16.201
6/20/2018 10:40:00 PM.000	609	1.7	0.31	3.68	1.43043	18.74	16.0003
6/20/2018 10:45:00 PM.000	627.4	1.67	0.3	3.76	1.39205	18.7375	10.9993
6/20/2018 10:50:00 PM.000	620.3	0.41	0.3	3.96	1.45428	18.735	5.62812
6/20/2018 10:55:00 PM.000	602.7	0.05	0.29	4.01	1.61615	18.7325	3.13616
6/20/2018 11:00:00 PM.000	622	0.04	0.28	3.81	1.69493	18.7325	3.28905
6/20/2018 11:05:00 PM.000	628	0.03	0.28	3.37	1.78426	18.735	3.46263
6/20/2018 11:10:00 PM.000	633.6	0.03	0.3	3.08	1.92605	18.73	3.73738
6/20/2018 11:15:00 PM.000	638.3	0.03	0.35	2.87	1.98656	18.725	3.85435
6/20/2018 11:20:00 PM.000	637.4	0.03	0.36	2.51	2.05537	18.7275	3.98811
6/20/2018 11:25:00 PM.000	642.8	0.03	0.37	2.23	2.08099	18.7225	4.03735
6/20/2018 11:30:00 PM.000	633.3	0.09	0.42	1.97	2.05344	18.7175	3.98342
6/20/2018 11:35:00 PM.000	609.6	1.03	0.43	1.53	1.9351	18.72	18.3311
6/20/2018 11:40:00 PM.000	603.6	1.5	0.44	1.41	1.79427	18.7175	30.5781
6/20/2018 11:45:00 PM.000	600.2	1.77	0.49	1.65	1.58852	18.7125	23.0761
6/20/2018 11:50:00 PM.000	598.8	0.9	0.45	1.67	1.60879	18.7125	15.9965
6/20/2018 11:55:00 PM.000	601.9	0.62	0.41	1.7	1.58783	18.715	15.1325
6/21/2018 12:00:00 AM.000	602.1	0.99	0.41	1.76	1.48594	18.71	22.8523
6/21/2018 12:05:00 AM.000	611.6	1.09	0.41	1.66	1.42377	18.7125	21.7365
6/21/2018 12:10:00 AM.000	618	1.16	0.41	1.63	1.42502	18.715	18.9567
6/21/2018 12:15:00 AM.000	596	1.69	0.41	1.73	1.34729	18.71	24.3508
6/21/2018 12:20:00 AM.000	597.6	2.29	0.43	2	1.26047	18.7075	24.7433
6/21/2018 12:25:00 AM.000	621.9	1.31	0.42	2.3	1.3174	18.7075	14.198
6/21/2018 12:30:00 AM.000	614.7	0.38	0.4	2.42	1.34181	18.7075	6.46686
6/21/2018 12:35:00 AM.000	594.6	0.96	0.37	2.38	1.3064	18.7025	14.066
6/21/2018 12:40:00 AM.000	606	1.75	0.37	2.55	1.27357	18.7	20.5752
6/21/2018 12:45:00 AM.000	619.1	2.01	0.36	2.67	1.26138	18.7	23.276
6/21/2018 12:50:00 AM.000	617.2	1.51	0.35	2.78	1.22329	18.6975	14.8731
6/21/2018 12:55:00 AM.000	610.7	0.61	0.34	2.92	1.22683	18.6975	5.57981
6/21/2018 1:00:00 AM.000	601.5	1.09	0.33	3.08	1.24603	18.695	10.1805
6/21/2018 1:05:00 AM.000	610.3	2.14	0.31	3.09	1.17799	18.6925	16.154
6/21/2018 1:10:00 AM.000	618.1	1.69	0.3	3.24	1.14721	18.6925	16.0353
6/21/2018 1:15:00 AM.000	602.1	0.92	0.3	3.45	1.16328	18.6925	8.26407
6/21/2018 1:20:00 AM.000	605.5	0.9	0.28	3.56	1.16757	18.6875	6.977
6/21/2018 1:25:00 AM.000	609	0.1	0.22	3.69	1.24507	18.6875	1.97801
6/21/2018 1:30:00 AM.000	598.7	0.04	0.22	3.56	1.40788	18.6825	2.72871
6/21/2018 1:35:00 AM.000	613.5	0.03	0.21	3.24	1.43797	18.6825	2.78704
6/21/2018 1:40:00 AM.000	609.4	0.03	0.22	2.9	1.50099	18.6775	2.90886
6/21/2018 1:45:00 AM.000	609.7	0.03	0.26	2.68	1.60081	18.6775	3.10234
6/21/2018 1:50:00 AM.000	618.2	0.03	0.28	2.29	1.63014	18.68	3.15937
6/21/2018 1:55:00 AM.000	603.6	0.03	0.3	1.91	1.46444	18.6725	2.83768
6/21/2018 2:00:00 AM.000	597.5	0.03	0.35	1.68	1.21557	18.6675	2.35509
6/21/2018 2:05:00 AM.000	607.5	0.3	0.37	1.25	1.27677	18.67	2.67333
6/21/2018 2:10:00 AM.000	593.8	0.76	0.39	0.96	1.04059	18.6675	12.6784
6/21/2018 2:15:00 AM.000	583.3	0.98	0.42	1.06	0.83381	18.6625	12.2296
6/21/2018 2:20:00 AM.000	574.3	1.4	0.42	0.94	0.88197	18.665	12.7741
6/21/2018 2:25:00 AM.000	578	1.7	0.43	0.86	0.85698	18.6625	18.3926
6/21/2018 2:30:00 AM.000	578.9	1.31	0.46	1.14	0.74307	18.66	10.339
6/21/2018 2:35:00 AM.000	578.1	0.91	0.45	1.27	0.73461	18.66	8.48787
6/21/2018 2:40:00 AM.000	566.1	1.07	0.43	1.17	0.79982	18.66	13.8362
6/21/2018 2:45:00 AM.000	588.2	1.76	0.45	1.32	0.75835	18.66	12.9485
6/21/2018 2:50:00 AM.000	594	1.64	0.45	1.66	0.72002	18.655	10.1073
6/21/2018 2:55:00 AM.000	580.3	1.4	0.42	1.82	0.75671	18.655	10.3955
6/21/2018 3:00:00 AM.000	589.7	1.34	0.4	1.93	0.76232	18.655	10.6298
6/21/2018 3:05:00 AM.000	590.3	1.51	0.35	2.13	0.72799	18.65	11.3895
6/21/2018 3:10:00 AM.000	575	2.43	0.32	2.32	0.71704	18.6475	14.2575
6/21/2018 3:15:00 AM.000	387.2	1.79	0.28	2.44	0.71699	18.6475	8.74014
6/21/2018 3:20:00 AM.000	141.7	0.63	0.27	2.62	0.70863	18.645	3.94
6/21/2018 3:25:00 AM.000	81.6	1.18	0.26	2.82	0.73387	18.6475	5.68436
6/21/2018 3:30:00 AM.000	59	2.02	0.23	2.84	0.68694	18.645	9.51349
6/21/2018 3:35:00 AM.000	38.7	2.28	0.23	3.07	0.67294	18.6475	10.1707
6/21/2018 3:40:00 AM.000	26.9	1.67	0.23	3.37	0.67061	18.65	5.18887
6/21/2018 3:45:00 AM.000	6.2	0.92	0.22	3.57	0.65989	18.65	2.86047
6/21/2018 3:50:00 AM.000	4.6	0.1	0.21	3.7	0.68559	18.65	0.100912
6/21/2018 3:55:00 AM.000	298.3	0.04	0.21	3.67	0.78663	18.6475	1.52317
6/21/2018 4:00:00 AM.000	600.4	0.04	0.21	3.55	0.78381	18.6475	1.51771
6/21/2018 4:05:00 AM.000	656.5	0.03	0.21	3.28	0.71772	18.645	1.38962
6/21/2018 4:10:00 AM.000	678.8	0.03	0.23	2.96	0.8003	18.6375	1.54928
6/21/2018 4:15:00 AM.000	663.6	0.03	0.25	2.71	0.53027	18.6425	1.02652
6/21/2018 4:20:00 AM.000	652.3	0.03	0.29	2.5	0.20555	18.6325	0.397558
6/21/2018 4:25:00 AM.000	656.3	0.04	0.31	2.06	0.23297	18.63	0.450621
6/21/2018 4:30:00 AM.000	640.6	0.26	0.32	1.68	0.15523	18.63	0.59598
6/21/2018 4:35:00 AM.000	614.1	0.78	0.36	1.58	0.02071	18.6275	0.280346
6/21/2018 4:40:00 AM.000	318.3	1.73	0.38	1.49	0.065	18.625	1.08094
6/21/2018 4:45:00 AM.000	122.8	2.14	0.38	1.56	0.10679	18.6225	1.68816
6/21/2018 4:50:00 AM.000	73.7	0.89	0.37	1.8	0.08183	18.625	0.654743
6/21/2018 4:55:00 AM.000	48.6	0.56	0.36	1.91	0.10743	18.6225	0.653537
6/21/2018 5:00:00 AM.000	4.1	1.23	0.33	1.95	0.16033	18.62	1.80607
6/21/2018 5:05:00 AM.000	24.2	1.79	0.32	2.04	0.15974	18.6225	2.22993
6/21/2018 5:10:00 AM.000	12	0.65	0.31	2.25	0.17753	18.62	1.69712
6/21/2018 5:15:00 AM.000	0.1	0.05	0.29	2.31	0.25591	18.62	0.494917
6/21/2018 5:20:00 AM.000	314.4	0.04	0.27	2.15	0.33677	18.6175	0.651391
6/21/2018 5:25:00 AM.000	655.6	0.03	0.27	1.92	0.3712	18.6125	0.717944
6/21/2018 5:30:00 AM.000	710.1	0.03	0.27	1.61	1.06133	18.6075	2.05328
6/21/2018 5:35:00 AM.000	718.4	0.03	0.28	1.3	0.31073	18.605	0.600812
6/21/2018 5:40:00 AM.000	691.7	0.03	0.3	1.04	0.11025	18.6025	0.212888
6/21/2018 5:45:00 AM.000	655.3	0.03	0.33	0.76	0.01477	18.6	0.0281519
6/21/2018 5:50:00 AM.000	331.3	0.03	0.35	0.37	0.01045	18.59	0.0197893
6/21/2018 5:55:00 AM.000	121.4	0.05	0.37	0.07	0.00775	18.59	0.0145669
6/21/2018 6:00:00 AM.000	104.9	0.21	0.4	0	0.01193	18.59	0.0802453
[truncated: 72,173 more rows]

## Sheet: Reactor 1 Compartment 2
Time	Influent flowrate (m3/h)	DO (g O2/m3)	NH4 (g N/m3)	NO3 (g N/m3)	N2O (g N/m3)	Temperature (°C)	N2O emission rate (g N/m3/d)
3/26/2018 12:00:00 AM.000	1333.6	1.03	2.22	1.09	0.01977	11.035	0.285456
3/26/2018 12:05:00 AM.000	917.2	1.8	2.42	1.15	0.00182	11.035	0.0257801
3/26/2018 12:10:00 AM.000	647.9	1.15	1.4	1.47	0.00096	11.04	0.00839999
3/26/2018 12:15:00 AM.000	616.8	0.21	0.97	1.94	0.0009	11.04	0.0033445
3/26/2018 12:20:00 AM.000	596	0.08	1.19	1.99	0.00087	11.04	0.00402982
3/26/2018 12:25:00 AM.000	597	-0.03	1.12	2.04	0.0074	11.0425	0.0115275
3/26/2018 12:30:00 AM.000	600.1	-0.03	0.92	2.04	0.02926	11.045	0.0468826
3/26/2018 12:35:00 AM.000	597.6	-0.03	1.55	1.84	0.03396	11.0425	0.0544807
3/26/2018 12:40:00 AM.000	592.5	-0.03	1.67	1.62	0.04626	11.045	0.0743769
3/26/2018 12:45:00 AM.000	591.5	-0.03	1.49	1.36	0.06596	11.045	0.106238
3/26/2018 12:50:00 AM.000	586.7	-0.03	2	1.06	0.07409	11.045	0.119387
3/26/2018 12:55:00 AM.000	615	-0.03	2.34	0.8	0.08915	11.0475	0.143752
3/26/2018 1:00:00 AM.000	985.2	0.22	2.38	0.84	0.12957	11.05	0.17281
3/26/2018 1:05:00 AM.000	1239.2	0.7	2.61	0.93	0.19499	11.05	1.87459
3/26/2018 1:10:00 AM.000	1265.7	0.85	2.51	1	0.23947	11.05	2.20979
3/26/2018 1:15:00 AM.000	1287.6	0.78	1.8	1.08	0.22129	11.05	1.89416
3/26/2018 1:20:00 AM.000	1081.5	1.11	1.67	1.22	0.21365	11.0525	2.68203
3/26/2018 1:25:00 AM.000	675.7	1.8	1.57	1.25	0.1897	11.0575	1.93721
3/26/2018 1:30:00 AM.000	593	0.78	0.91	1.54	0.10382	11.0575	0.743274
3/26/2018 1:35:00 AM.000	578.7	0.16	0.63	1.87	0.00642	11.0575	0.0250452
3/26/2018 1:40:00 AM.000	597.8	-0.02	0.7	1.99	0.0003	11.0575	0.000591298
3/26/2018 1:45:00 AM.000	579.9	-0.03	0.69	1.8	0.00064	11.0575	0.000595503
3/26/2018 1:50:00 AM.000	578.6	-0.03	0.53	1.71	0.00176	11.0575	0.00240743
3/26/2018 1:55:00 AM.000	592.4	-0.03	0.89	1.68	0.00359	11.0575	0.00536799
3/26/2018 2:00:00 AM.000	596.8	-0.03	1.19	1.42	0.00732	11.06	0.0114031
3/26/2018 2:05:00 AM.000	593.5	-0.03	1.09	1.21	0.02056	11.06	0.0328239
3/26/2018 2:10:00 AM.000	619.5	-0.03	1.46	1.19	0.04023	11.0625	0.0646516
3/26/2018 2:15:00 AM.000	1029.9	-0.03	1.87	1.1	0.05388	11.0625	0.0867371
3/26/2018 2:20:00 AM.000	1243.7	-0.03	1.87	1.03	0.06127	11.0625	0.098694
3/26/2018 2:25:00 AM.000	1212	0.36	2.44	0.97	0.07578	11.065	0.184061
3/26/2018 2:30:00 AM.000	771.4	0.91	2.97	0.94	0.08719	11.065	1.08139
3/26/2018 2:35:00 AM.000	634.4	1	2.95	0.99	0.12797	11.065	1.1782
3/26/2018 2:40:00 AM.000	602.6	0.79	2.67	1.08	0.18829	11.065	1.76597
3/26/2018 2:45:00 AM.000	592.8	0.79	2.45	1.29	0.23834	11.07	2.00084
3/26/2018 2:50:00 AM.000	586.2	0.8	2.16	1.36	0.26374	11.0725	2.32249
3/26/2018 2:55:00 AM.000	591.3	0.82	1.85	1.52	0.26835	11.0725	2.57996
3/26/2018 3:00:00 AM.000	590.6	1.17	1.64	1.7	0.27498	11.0725	3.57314
3/26/2018 3:05:00 AM.000	573.7	1.5	1.19	1.96	0.26708	11.0725	3.3675
3/26/2018 3:10:00 AM.000	594.7	1.12	0.85	2.25	0.19441	11.0725	2.18777
3/26/2018 3:15:00 AM.000	611.3	0.03	0.67	2.44	0.06327	11.0725	0.207379
3/26/2018 3:20:00 AM.000	601.1	-0.03	0.59	2.46	0.0016	11.075	0.0021497
3/26/2018 3:25:00 AM.000	604.9	-0.03	0.54	2.36	0.00029	11.0775	2.95499e-05
3/26/2018 3:30:00 AM.000	623.6	-0.03	0.51	2.19	0.00029	11.0775	2.95499e-05
3/26/2018 3:35:00 AM.000	615.5	-0.03	0.5	2.03	0.00028	11.0775	1.33643e-05
3/26/2018 3:40:00 AM.000	616.4	-0.03	0.49	1.89	0	11.08	-0.000439826
3/26/2018 3:45:00 AM.000	598.9	-0.03	0.48	1.77	0	11.08	-0.000439826
3/26/2018 3:50:00 AM.000	587.8	-0.03	0.51	1.65	0.00016	11.08	-0.000180841
3/26/2018 3:55:00 AM.000	594	-0.03	0.74	1.39	0.00094	11.08	0.00108171
3/26/2018 4:00:00 AM.000	598	-0.03	0.93	1.26	0.00848	11.08	0.0132864
3/26/2018 4:05:00 AM.000	589.7	-0.03	0.99	1.02	0.0178	11.08	0.0283722
3/26/2018 4:10:00 AM.000	592.4	-0.03	1.34	0.87	0.02542	11.0825	0.0407088
3/26/2018 4:15:00 AM.000	607.7	0.19	1.63	0.88	0.03206	11.0825	0.0545957
3/26/2018 4:20:00 AM.000	601.3	0.47	1.62	0.9	0.04652	11.085	0.392931
3/26/2018 4:25:00 AM.000	600.7	0.55	1.63	0.86	0.06366	11.085	0.583658
3/26/2018 4:30:00 AM.000	595.2	0.87	1.71	0.87	0.07974	11.085	0.767188
3/26/2018 4:35:00 AM.000	599.9	0.75	1.71	0.96	0.09395	11.085	0.902032
3/26/2018 4:40:00 AM.000	594.1	0.95	1.57	1.17	0.13735	11.085	1.89271
3/26/2018 4:45:00 AM.000	595.6	1.79	1.41	1.24	0.20317	11.0875	2.98396
3/26/2018 4:50:00 AM.000	596.9	2.04	1.07	1.51	0.26025	11.09	2.67499
3/26/2018 4:55:00 AM.000	613.9	1.98	0.56	2.03	0.29664	11.09	3.8288
3/26/2018 5:00:00 AM.000	609.6	0.9	0.32	2.33	0.33713	11.09	2.32523
3/26/2018 5:05:00 AM.000	582.6	0.62	0.23	2.57	0.35981	11.09	2.8468
3/26/2018 5:10:00 AM.000	584	0.85	0.09	2.68	0.37105	11.09	3.40514
3/26/2018 5:15:00 AM.000	584.9	0.01	0.07	2.95	0.33701	11.09	0.849385
3/26/2018 5:20:00 AM.000	595.5	-0.03	0.07	2.9	0.30355	11.09	0.49102
3/26/2018 5:25:00 AM.000	598.7	-0.03	0.07	2.84	0.31317	11.09	0.506595
3/26/2018 5:30:00 AM.000	590.9	-0.03	0.08	2.69	0.29219	11.09	0.472627
3/26/2018 5:35:00 AM.000	583.6	-0.03	0.1	2.42	0.28455	11.0925	0.460285
3/26/2018 5:40:00 AM.000	596.8	-0.03	0.11	2.14	0.29176	11.0925	0.471959
3/26/2018 5:45:00 AM.000	584.6	-0.03	0.35	2.04	0.29466	11.0925	0.476655
3/26/2018 5:50:00 AM.000	585.9	-0.03	0.6	1.79	0.29358	11.0925	0.474906
3/26/2018 5:55:00 AM.000	600	-0.03	0.61	1.51	0.30256	11.0925	0.489446
3/26/2018 6:00:00 AM.000	612.9	-0.03	0.86	1.39	0.32968	11.095	0.533388
3/26/2018 6:05:00 AM.000	604	-0.03	1.29	1.23	0.39147	11.095	0.633441
3/26/2018 6:10:00 AM.000	588.8	0	1.3	1.11	0.43672	11.095	0.706711
3/26/2018 6:15:00 AM.000	593.5	0.07	1.45	0.97	0.44756	11.095	1.3308
3/26/2018 6:20:00 AM.000	577	0.45	1.85	0.89	0.47572	11.095	3.7193
3/26/2018 6:25:00 AM.000	596.2	0.84	1.25	0.97	0.50346	11.0925	4.18754
3/26/2018 6:30:00 AM.000	606.1	1.11	0.93	1.09	0.4447	11.09	4.73315
3/26/2018 6:35:00 AM.000	587.2	1.24	1.04	1.27	0.42153	11.09	4.26175
3/26/2018 6:40:00 AM.000	586.5	0.75	0.71	1.42	0.41917	11.09	2.19291
3/26/2018 6:45:00 AM.000	577.8	-0.01	0.31	1.62	0.22718	11.09	0.344977
3/26/2018 6:50:00 AM.000	575.4	-0.03	0.45	1.57	0.00549	11.09	0.00844873
3/26/2018 6:55:00 AM.000	578.1	-0.03	0.55	1.49	0.0014	11.09	0.00182685
3/26/2018 7:00:00 AM.000	575.7	-0.03	0.29	1.36	0.00058	11.0875	0.000499181
3/26/2018 7:05:00 AM.000	559.3	-0.03	0.34	1.26	0.00052	11.0875	0.000402044
3/26/2018 7:10:00 AM.000	571.1	-0.03	0.49	1.13	3e-05	11.085	-0.000391248
3/26/2018 7:15:00 AM.000	605.3	-0.03	0.35	0.92	0	11.085	-0.000439813
3/26/2018 7:20:00 AM.000	613.2	-0.03	0.35	0.88	0	11.08	-0.000439826
3/26/2018 7:25:00 AM.000	627.8	-0.03	0.51	0.9	0	11.08	-0.000439826
3/26/2018 7:30:00 AM.000	624	-0.03	0.45	0.94	4e-05	11.0775	-0.00037509
3/26/2018 7:35:00 AM.000	609.7	-0.03	0.45	0.98	0.00053	11.0775	0.000418004
3/26/2018 7:40:00 AM.000	598.2	-0.03	0.87	0.95	0.00149	11.0775	0.00197182
3/26/2018 7:45:00 AM.000	578.6	-0.03	0.95	1.03	0.00603	11.0725	0.00931891
3/26/2018 7:50:00 AM.000	571.9	-0.03	1.06	1.07	0.0078	11.0725	0.0121834
3/26/2018 7:55:00 AM.000	571	-0.03	1.5	0.99	0.02405	11.0725	0.0384819
3/26/2018 8:00:00 AM.000	569.2	-0.03	1.6	1	0.0478	11.0725	0.0769181
3/26/2018 8:05:00 AM.000	563.9	-0.02	1.8	0.94	0.0678	11.07	0.109279
3/26/2018 8:10:00 AM.000	582.7	0.18	2.11	0.88	0.07598	11.07	0.47692
3/26/2018 8:15:00 AM.000	589.7	0.48	2.07	0.93	0.08717	11.0675	0.802139
3/26/2018 8:20:00 AM.000	588.5	0.62	2.19	0.93	0.10047	11.0675	1.02538
3/26/2018 8:25:00 AM.000	584.7	1.02	2.32	0.91	0.10766	11.07	1.33084
3/26/2018 8:30:00 AM.000	582.1	1.31	2.1	1.01	0.10788	11.07	1.41059
3/26/2018 8:35:00 AM.000	570.8	1.12	1.99	1.09	0.13274	11.07	1.68263
3/26/2018 8:40:00 AM.000	580.3	1.18	1.99	1.28	0.21318	11.07	2.53424
3/26/2018 8:45:00 AM.000	575.9	1.4	1.77	1.49	0.26198	11.0675	3.11387
3/26/2018 8:50:00 AM.000	570.7	1.22	1.18	1.91	0.3253	11.07	3.33492
3/26/2018 8:55:00 AM.000	597.4	1.43	0.94	2.15	0.38174	11.0675	4.34144
3/26/2018 9:00:00 AM.000	609.6	0.98	0.78	2.44	0.38788	11.0675	3.09101
3/26/2018 9:05:00 AM.000	578.7	0.8	0.47	2.57	0.42681	11.0675	3.25923
3/26/2018 9:10:00 AM.000	582.2	0.27	0.19	2.82	0.43453	11.0675	2.81983
3/26/2018 9:15:00 AM.000	580.5	-0.03	0.2	2.8	0.328	11.0675	0.530322
3/26/2018 9:20:00 AM.000	574.6	-0.03	0.16	2.59	0.33341	11.0675	0.539076
3/26/2018 9:25:00 AM.000	576.4	-0.03	0.09	2.44	0.30691	11.07	0.496224
3/26/2018 9:30:00 AM.000	878.5	-0.03	0.1	2.42	0.22739	11.07	0.367539
3/26/2018 9:35:00 AM.000	1199.4	-0.03	0.16	2.27	0.25026	11.07	0.404549
3/26/2018 9:40:00 AM.000	1273	-0.03	0.46	2.05	0.25327	11.07	0.40942
3/26/2018 9:45:00 AM.000	1233.3	-0.03	0.8	1.86	0.23503	11.0725	0.379925
3/26/2018 9:50:00 AM.000	1153.7	-0.03	1.02	1.64	0.23972	11.0725	0.387515
3/26/2018 9:55:00 AM.000	710.5	-0.03	1.44	1.4	0.26187	11.0725	0.423362
3/26/2018 10:00:00 AM.000	580.5	-0.03	1.94	1.16	0.27498	11.0725	0.444579
3/26/2018 10:05:00 AM.000	534.5	-0.03	2.01	1.1	0.27027	11.0725	0.436956
3/26/2018 10:10:00 AM.000	538.9	0.16	2.3	1.02	0.30239	11.0775	0.946784
3/26/2018 10:15:00 AM.000	562.7	0.62	2.45	0.99	0.36681	11.0775	3.82538
3/26/2018 10:20:00 AM.000	549.2	1.36	2.19	1.15	0.39773	11.0825	4.58532
3/26/2018 10:25:00 AM.000	542.7	1.25	1.69	1.21	0.4284	11.085	4.06438
3/26/2018 10:30:00 AM.000	562.3	0.76	1.65	1.29	0.44998	11.085	3.55899
3/26/2018 10:35:00 AM.000	574	0.76	1.51	1.41	0.42623	11.09	3.14302
3/26/2018 10:40:00 AM.000	579.6	1.18	0.97	1.6	0.3807	11.09	3.22043
3/26/2018 10:45:00 AM.000	576.8	0.61	0.77	1.83	0.34359	11.095	2.80979
3/26/2018 10:50:00 AM.000	945.7	-0.02	0.78	1.97	0.3153	11.0975	0.570862
3/26/2018 10:55:00 AM.000	1217.2	-0.03	0.73	1.86	0.30055	11.1025	0.486307
3/26/2018 11:00:00 AM.000	1231.4	-0.03	1.25	1.72	0.29471	11.105	0.476877
3/26/2018 11:05:00 AM.000	1201.5	-0.03	1.58	1.57	0.30849	11.11	0.499255
3/26/2018 11:10:00 AM.000	1191	-0.03	1.79	1.37	0.32185	11.115	0.520957
3/26/2018 11:15:00 AM.000	1180.9	-0.03	2.19	1.1	0.34093	11.1175	0.551899
3/26/2018 11:20:00 AM.000	1133.1	-0.03	2.76	0.93	0.39956	11.1175	0.646886
3/26/2018 11:25:00 AM.000	755.1	-0.02	3.16	0.92	0.43859	11.1225	0.514324
3/26/2018 11:30:00 AM.000	584.8	0.14	3.34	0.86	0.43159	11.1275	3.06481
3/26/2018 11:35:00 AM.000	563	0.41	3.04	0.92	0.45087	11.1275	3.7482
3/26/2018 11:40:00 AM.000	567.2	0.97	2.9	0.95	0.43377	11.1325	5.40347
3/26/2018 11:45:00 AM.000	566.9	1.23	2.76	0.96	0.14081	11.1375	1.82425
3/26/2018 11:50:00 AM.000	796.2	1.13	2.45	1.15	0.00239	11.1425	0.0276514
3/26/2018 11:55:00 AM.000	1153.2	1.06	1.95	1.29	0.00174	11.1425	0.0220815
3/26/2018 12:00:00 PM.000	1217.2	1.2	1.76	1.5	0.00202	11.1525	0.0270732
3/26/2018 12:05:00 PM.000	1192.1	1.56	1.51	1.78	0.00268	11.1525	0.0371902
3/26/2018 12:10:00 PM.000	1051.1	1.53	1	2.11	0.0053	11.1625	0.0571465
3/26/2018 12:15:00 PM.000	667.8	0.13	0.71	2.27	0.01349	11.17	0.0652551
3/26/2018 12:20:00 PM.000	577.5	-0.03	0.77	2.31	0.03359	11.1725	0.0540505
3/26/2018 12:25:00 PM.000	570.8	-0.03	0.94	2.15	0.04852	11.175	0.0782747
3/26/2018 12:30:00 PM.000	565.6	-0.03	1.08	1.91	0.07298	11.1825	0.117977
3/26/2018 12:35:00 PM.000	564.8	-0.03	1.21	1.72	0.10737	11.185	0.173789
3/26/2018 12:40:00 PM.000	558.8	-0.03	1.43	1.52	0.10353	11.1875	0.167568
3/26/2018 12:45:00 PM.000	759.5	-0.03	1.64	1.31	0.14044	11.195	0.227505
3/26/2018 12:50:00 PM.000	1139.9	-0.03	1.84	1.14	0.23396	11.2	0.37934
3/26/2018 12:55:00 PM.000	1241.4	-0.03	2.12	0.99	0.2718	11.2025	0.440791
3/26/2018 1:00:00 PM.000	1228.8	0.02	2.65	0.86	0.32439	11.205	0.253706
3/26/2018 1:05:00 PM.000	1220.8	0.31	2.89	0.8	0.37699	11.21	2.49415
3/26/2018 1:10:00 PM.000	1222.6	0.46	2.54	0.88	0.36779	11.21	2.83105
3/26/2018 1:15:00 PM.000	1206.7	0.57	2.26	0.92	0.36971	11.21	2.9642
3/26/2018 1:20:00 PM.000	1207.7	1.3	2.32	0.93	0.27913	11.2175	3.91025
3/26/2018 1:25:00 PM.000	1192.5	1.69	1.99	1.03	0.09364	11.22	1.34181
3/26/2018 1:30:00 PM.000	1179.5	1.17	1.34	1.4	0.00252	11.2225	0.0281558
3/26/2018 1:35:00 PM.000	986.6	0.53	1.2	1.64	0.002	11.225	0.0133654
3/26/2018 1:40:00 PM.000	540.4	-0.01	1.19	1.74	0.00247	11.23	0.00743642
3/26/2018 1:45:00 PM.000	565.2	-0.03	1.03	1.66	0.00425	11.23	0.00646436
3/26/2018 1:50:00 PM.000	588.7	-0.03	1.27	1.49	0.01517	11.235	0.024206
3/26/2018 1:55:00 PM.000	616.3	-0.03	1.65	1.25	0.04402	11.2375	0.0710804
3/26/2018 2:00:00 PM.000	876.5	-0.03	1.64	1.13	0.05993	11.2375	0.0969296
3/26/2018 2:05:00 PM.000	1185.4	-0.03	1.84	0.92	0.0677	11.24	0.10956
3/26/2018 2:10:00 PM.000	1262.2	-0.03	2.42	0.83	0.08693	11.2425	0.140814
3/26/2018 2:15:00 PM.000	1294.1	0.01	2.69	0.85	0.11757	11.2425	0.186972
3/26/2018 2:20:00 PM.000	1269.5	0.56	2.87	0.94	0.12791	11.245	1.24549
3/26/2018 2:25:00 PM.000	1246.5	1.41	3.19	0.89	0.17035	11.25	2.15693
3/26/2018 2:30:00 PM.000	1238.9	1.6	3.22	0.99	0.23124	11.2525	2.59468
3/26/2018 2:35:00 PM.000	980.2	0.86	2.49	1.22	0.24797	11.255	1.69083
3/26/2018 2:40:00 PM.000	591.5	0.4	2.17	1.46	0.31349	11.2575	1.7
3/26/2018 2:45:00 PM.000	593.1	0.73	2.33	1.59	0.35081	11.26	2.74866
3/26/2018 2:50:00 PM.000	596	0.95	2.01	1.67	0.29382	11.2625	3.06764
3/26/2018 2:55:00 PM.000	602.1	1.16	1.36	1.84	0.30051	11.265	3.25094
3/26/2018 3:00:00 PM.000	607.2	1.22	1.24	2.06	0.28567	11.2675	3.01816
3/26/2018 3:05:00 PM.000	591.5	0.49	1.1	2.14	0.21033	11.27	1.88318
3/26/2018 3:10:00 PM.000	747.7	-0.02	0.78	2.3	0.20785	11.2725	0.211721
3/26/2018 3:15:00 PM.000	1201.3	-0.03	0.91	2.21	0.25586	11.275	0.41563
3/26/2018 3:20:00 PM.000	1315.9	-0.03	1.52	2.03	0.23475	11.275	0.381301
3/26/2018 3:25:00 PM.000	1363.9	-0.03	1.66	1.73	0.24866	11.28	0.403969
3/26/2018 3:30:00 PM.000	1354.7	-0.03	1.87	1.56	0.28693	11.28	0.46621
3/26/2018 3:35:00 PM.000	1305.3	-0.03	2.56	1.49	0.30144	11.285	0.489866
3/26/2018 3:40:00 PM.000	1301.8	-0.02	2.96	1.29	0.34779	11.285	0.565257
3/26/2018 3:45:00 PM.000	1282.9	0.38	3.21	0.99	0.40833	11.29	0.792487
3/26/2018 3:50:00 PM.000	1238.6	1.33	3.6	0.92	0.43779	11.2875	4.78212
3/26/2018 3:55:00 PM.000	840.2	1.45	3.08	0.96	0.44845	11.295	4.65981
3/26/2018 4:00:00 PM.000	626	0.95	2.45	1.06	0.48736	11.295	3.82449
3/26/2018 4:05:00 PM.000	578.4	0.82	2.55	1.24	0.43242	11.2975	3.33217
3/26/2018 4:10:00 PM.000	577.2	0.79	2.42	1.46	0.30961	11.3	2.28931
3/26/2018 4:15:00 PM.000	586	0.7	1.74	1.67	0.31538	11.3	2.38534
3/26/2018 4:20:00 PM.000	586	1.03	1.54	1.83	0.21637	11.305	1.83826
3/26/2018 4:25:00 PM.000	603.4	0.97	1.46	1.96	0.0572	11.3075	0.607537
3/26/2018 4:30:00 PM.000	748.6	0.01	1.09	2.16	0.11185	11.3075	0.373038
3/26/2018 4:35:00 PM.000	1158.2	-0.03	1.03	2.15	0.22488	11.31	0.365555
3/26/2018 4:40:00 PM.000	1305.2	-0.03	1.73	2.06	0.13227	11.31	0.214831
3/26/2018 4:45:00 PM.000	1277.9	-0.03	2.02	1.82	0.13535	11.31	0.219844
3/26/2018 4:50:00 PM.000	1269.5	-0.03	2.1	1.46	0.25006	11.3125	0.40656
3/26/2018 4:55:00 PM.000	1263.4	-0.03	2.76	1.24	0.21061	11.3175	0.342391
3/26/2018 5:00:00 PM.000	1258.6	-0.02	3.34	1.1	0.23844	11.3175	0.387693
3/26/2018 5:05:00 PM.000	1225.3	0.39	3.48	0.99	0.36818	11.32	1.8926
3/26/2018 5:10:00 PM.000	1228.2	0.68	3.59	0.92	0.36022	11.32	2.6566
3/26/2018 5:15:00 PM.000	814.1	0.18	3.15	1.08	0.35244	11.32	1.6821
3/26/2018 5:20:00 PM.000	603.4	0.24	3.05	1.07	0.42842	11.3225	2.93421
3/26/2018 5:25:00 PM.000	576.6	0.7	3.05	0.99	0.33865	11.325	3.86078
3/26/2018 5:30:00 PM.000	577.6	1.37	2.68	0.95	0.14603	11.325	1.90515
3/26/2018 5:35:00 PM.000	572.6	1.04	2.18	1.26	0.23171	11.325	2.44199
3/26/2018 5:40:00 PM.000	583.8	1.04	1.97	1.4	0.19797	11.3275	2.45009
3/26/2018 5:45:00 PM.000	560.6	1.48	1.7	1.58	0.03482	11.3275	0.482745
3/26/2018 5:50:00 PM.000	607.4	1.39	1.2	1.86	0.14246	11.33	1.71672
3/26/2018 5:55:00 PM.000	1086	0.67	0.86	2.14	0.19354	11.33	1.87382
3/26/2018 6:00:00 PM.000	1306.8	-0.02	0.81	2.38	0.11065	11.3325	0.224583
3/26/2018 6:05:00 PM.000	1291.5	-0.03	0.94	2.33	0.13141	11.335	0.213559
3/26/2018 6:10:00 PM.000	1278.4	-0.03	1.59	2.05	0.22528	11.34	0.366467
3/26/2018 6:15:00 PM.000	1279.1	-0.03	1.77	1.78	0.22192	11.34	0.360995
3/26/2018 6:20:00 PM.000	1254.5	-0.03	2.12	1.59	0.19284	11.3425	0.313652
3/26/2018 6:25:00 PM.000	1145.8	-0.03	2.8	1.29	0.2476	11.3425	0.402843
3/26/2018 6:30:00 PM.000	691.6	-0.01	3.22	1.01	0.31456	11.35	0.511996
3/26/2018 6:35:00 PM.000	565.9	0.03	3.49	0.91	0.33967	11.35	1.16932
3/26/2018 6:40:00 PM.000	572.2	0.06	3.55	0.92	0.41337	11.35	2.16255
3/26/2018 6:45:00 PM.000	567.5	0.44	3.22	0.95	0.47714	11.35	3.8035
3/26/2018 6:50:00 PM.000	551.9	0.72	3.15	0.99	0.48858	11.35	5.01057
3/26/2018 6:55:00 PM.000	666.7	1.03	3	1.09	0.48974	11.35	5.82796
3/26/2018 7:00:00 PM.000	1096.6	1.18	2.5	1.26	0.47781	11.35	5.64143
3/26/2018 7:05:00 PM.000	1242.3	0.94	2.14	1.43	0.4119	11.35	5.09496
3/26/2018 7:10:00 PM.000	1269.1	1.14	1.97	1.66	0.34713	11.35	4.22704
3/26/2018 7:15:00 PM.000	1247	1.44	1.6	1.82	0.33348	11.3525	4.75268
3/26/2018 7:20:00 PM.000	1246.6	1.61	1.11	1.93	0.29417	11.355	4.31754
3/26/2018 7:25:00 PM.000	1225.5	1.08	0.84	2.18	0.29364	11.36	3.5821
3/26/2018 7:30:00 PM.000	1223.6	0	0.73	2.46	0.29755	11.36	0.658522
3/26/2018 7:35:00 PM.000	1179	-0.03	0.82	2.43	0.30953	11.36	0.503921
3/26/2018 7:40:00 PM.000	806.7	-0.03	1.57	2.2	0.33348	11.3675	0.543043
3/26/2018 7:45:00 PM.000	571.4	-0.03	1.79	1.87	0.35631	11.3675	0.58025
3/26/2018 7:50:00 PM.000	525.2	-0.03	1.74	1.66	0.36311	11.3675	0.591332
3/26/2018 7:55:00 PM.000	532.9	-0.03	2.23	1.46	0.37479	11.3675	0.610367
3/26/2018 8:00:00 PM.000	528.1	-0.03	2.56	1.27	0.42025	11.3675	0.684455
3/26/2018 8:05:00 PM.000	550.5	0.03	2.6	1.04	0.43326	11.3675	0.705658
3/26/2018 8:10:00 PM.000	960.1	0.72	2.82	0.81	0.41942	11.3675	3.4272
3/26/2018 8:15:00 PM.000	1196.2	1.18	2.86	0.77	0.48091	11.3725	4.74132
3/26/2018 8:20:00 PM.000	1225.5	1.22	2.88	0.91	0.54281	11.375	5.23487
3/26/2018 8:25:00 PM.000	1195.9	0.94	2.32	1.25	0.55106	11.3775	4.50318
3/26/2018 8:30:00 PM.000	1181.4	1	1.91	1.45	0.62023	11.3775	6.33263
3/26/2018 8:35:00 PM.000	1166.8	1.42	1.8	1.57	0.62491	11.3825	6.87562
3/26/2018 8:40:00 PM.000	1145.8	0.96	1.53	1.71	0.52585	11.3825	4.20201
3/26/2018 8:45:00 PM.000	1032.1	0.66	1.01	1.98	0.48542	11.385	3.33316
3/26/2018 8:50:00 PM.000	628.2	0.19	0.85	2.46	0.35431	11.3875	2.26743
3/26/2018 8:55:00 PM.000	505.9	-0.03	0.95	2.41	0.22885	11.3875	0.372702
3/26/2018 9:00:00 PM.000	493.1	-0.03	0.77	2.15	0.24461	11.385	0.398375
3/26/2018 9:05:00 PM.000	483.7	-0.03	0.86	1.98	0.25074	11.3875	0.408393
3/26/2018 9:10:00 PM.000	498.5	-0.03	1.35	1.69	0.17258	11.39	0.28097
3/26/2018 9:15:00 PM.000	509.2	-0.03	1.31	1.55	0.22291	11.395	0.363081
3/26/2018 9:20:00 PM.000	515.7	-0.03	1.4	1.42	0.25222	11.395	0.41088
3/26/2018 9:25:00 PM.000	795.7	-0.03	1.86	1.24	0.224	11.395	0.364859
3/26/2018 9:30:00 PM.000	1130.1	-0.03	2.01	1.03	0.25561	11.395	0.416408
3/26/2018 9:35:00 PM.000	1183	0.04	2.24	0.84	0.28687	11.395	0.467387
3/26/2018 9:40:00 PM.000	1180	0.19	2.77	0.86	0.27822	11.3975	1.60392
3/26/2018 9:45:00 PM.000	1170.7	0.13	3.05	0.82	0.30888	11.4025	2.89519
3/26/2018 9:50:00 PM.000	1145.7	0.49	2.99	0.86	0.33623	11.405	4.10546
3/26/2018 9:55:00 PM.000	1184.8	0.98	3.31	0.85	0.3628	11.4075	4.33933
3/26/2018 10:00:00 PM.000	1195.3	1.15	3.52	0.95	0.4205	11.41	5.87416
3/26/2018 10:05:00 PM.000	1158	1.53	2.69	1.08	0.44752	11.41	5.84807
3/26/2018 10:10:00 PM.000	1182	1.14	2.07	1.44	0.48655	11.415	5.76686
3/26/2018 10:15:00 PM.000	879.1	1.19	2.22	1.71	0.42072	11.4175	5.7353
3/26/2018 10:20:00 PM.000	262.3	1.63	1.94	1.67	0.3387	11.4175	4.94313
3/26/2018 10:25:00 PM.000	127.6	1.32	1.09	1.95	0.37654	11.415	4.26824
3/26/2018 10:30:00 PM.000	403.1	0.41	0.91	2.34	0.27671	11.42	1.43683
3/26/2018 10:35:00 PM.000	742.5	-0.02	1.07	2.53	0.19463	11.42	0.252277
3/26/2018 10:40:00 PM.000	1182.1	-0.03	0.83	2.33	0.2689	11.42	0.438341
3/26/2018 10:45:00 PM.000	1282.7	-0.03	1.23	2.15	0.29849	11.42	0.486625
3/26/2018 10:50:00 PM.000	1254.7	-0.03	1.87	1.85	0.22634	11.425	0.368937
3/26/2018 10:55:00 PM.000	1264.6	-0.03	1.91	1.52	0.26282	11.4225	0.428446
3/26/2018 11:00:00 PM.000	1279.5	-0.03	2.24	1.32	0.31796	11.4275	0.518488
3/26/2018 11:05:00 PM.000	1085.2	-0.03	3.03	1.11	0.31505	11.43	0.513769
3/26/2018 11:10:00 PM.000	680.1	0.13	3.41	0.86	0.38062	11.435	0.439261
3/26/2018 11:15:00 PM.000	600.1	0.89	3.34	0.92	0.45352	11.435	4.85366
3/26/2018 11:20:00 PM.000	587.1	1.33	3.16	1.04	0.44413	11.435	5.07373
3/26/2018 11:25:00 PM.000	574.9	1.14	2.75	1.17	0.47126	11.435	4.78113
3/26/2018 11:30:00 PM.000	573.8	0.83	2.52	1.34	0.44225	11.4425	4.3668
3/26/2018 11:35:00 PM.000	579.1	1.11	2.27	1.51	0.30126	11.4425	3.00337
3/26/2018 11:40:00 PM.000	594.5	0.73	1.86	1.64	0.23505	11.44	1.99465
3/26/2018 11:45:00 PM.000	591.4	0.65	1.62	1.68	0.20281	11.44	1.72887
3/26/2018 11:50:00 PM.000	589.6	1.13	1.32	1.72	0.06658	11.44	0.791847
3/26/2018 11:55:00 PM.000	605.4	0.59	1	1.9	0.0198	11.4425	0.24282
3/27/2018 12:00:00 AM.000	630.1	-0.02	0.84	2.08	0.14044	11.44	0.270742
3/27/2018 12:05:00 AM.000	1016.1	-0.03	1.12	2.05	0.12014	11.44	0.195694
3/27/2018 12:10:00 AM.000	1247	-0.03	1.42	1.92	0.06966	11.4375	0.113277
3/27/2018 12:15:00 AM.000	1275.5	-0.03	1.56	1.49	0.16539	11.4375	0.26955
3/27/2018 12:20:00 AM.000	1226.2	-0.03	2.04	1.31	0.20296	11.44	0.3309
3/27/2018 12:25:00 AM.000	1034.6	-0.03	2.53	1.05	0.18104	11.44	0.295115
3/27/2018 12:30:00 AM.000	694.5	0.14	2.78	0.92	0.27435	11.44	0.420271
3/27/2018 12:35:00 AM.000	604.6	0.94	2.99	0.75	0.3464	11.4375	4.04046
3/27/2018 12:40:00 AM.000	591	1.17	2.67	0.86	0.33403	11.435	4.26137
3/27/2018 12:45:00 AM.000	571.4	0.97	2.08	0.92	0.36804	11.4375	4.36133
3/27/2018 12:50:00 AM.000	571	0.76	2.07	1.19	0.32414	11.435	3.67317
3/27/2018 12:55:00 AM.000	577	1.18	1.9	1.38	0.09721	11.435	1.11472
3/27/2018 1:00:00 AM.000	584.4	1.55	1.29	1.47	0.00273	11.4325	0.0350596
3/27/2018 1:05:00 AM.000	602.5	0.76	0.93	1.66	0.00261	11.4325	0.0242843
3/27/2018 1:10:00 AM.000	1017.6	0	0.91	1.85	0.00379	11.435	0.0128292
3/27/2018 1:15:00 AM.000	1250.3	-0.03	0.83	1.84	0.01234	11.4325	0.019703
3/27/2018 1:20:00 AM.000	1256.2	-0.03	1.22	1.65	0.02997	11.4375	0.0484852
3/27/2018 1:25:00 AM.000	1281.3	-0.03	1.72	1.33	0.04167	11.4375	0.0675848
3/27/2018 1:30:00 AM.000	1259.3	-0.03	1.89	1.18	0.07853	11.44	0.127764
3/27/2018 1:35:00 AM.000	1244.4	-0.03	2.34	1.03	0.09953	11.44	0.162047
3/27/2018 1:40:00 AM.000	1225	0.11	3.02	0.98	0.12464	11.4425	0.613971
3/27/2018 1:45:00 AM.000	1194.8	0.58	3.18	0.94	0.20282	11.4425	2.48966
3/27/2018 1:50:00 AM.000	911.8	1.22	2.98	0.9	0.17913	11.445	2.28558
3/27/2018 1:55:00 AM.000	604.9	1.44	2.37	0.93	0.20674	11.445	2.86367
3/27/2018 2:00:00 AM.000	566.1	0.97	2.22	1.04	0.19884	11.445	2.20277
3/27/2018 2:05:00 AM.000	561.7	0.42	2.07	1.33	0.01362	11.445	0.100947
3/27/2018 2:10:00 AM.000	577	1.08	1.64	1.35	0.0009	11.445	0.00944383
3/27/2018 2:15:00 AM.000	586	1.19	1.22	1.46	0.00166	11.4425	0.0232112
3/27/2018 2:20:00 AM.000	582.5	0.5	1.05	1.71	0.00214	11.4425	0.0218301
3/27/2018 2:25:00 AM.000	584	-0.02	0.91	1.83	0.0039	11.4425	0.00528093
3/27/2018 2:30:00 AM.000	589.8	-0.03	0.95	1.86	0.01595	11.445	0.0256031
3/27/2018 2:35:00 AM.000	627.9	-0.03	1.38	1.63	0.02751	11.4475	0.0444801
3/27/2018 2:40:00 AM.000	1031.2	-0.03	1.44	1.29	0.06828	11.4475	0.11105
3/27/2018 2:45:00 AM.000	1208.5	-0.03	1.53	1.11	0.09635	11.4475	0.156884
3/27/2018 2:50:00 AM.000	1228.5	-0.03	2.17	0.96	0.12026	11.45	0.195936
3/27/2018 2:55:00 AM.000	1230.7	-0.03	2.49	0.92	0.16685	11.45	0.272014
3/27/2018 3:00:00 AM.000	1263.6	0.13	2.72	0.92	0.21846	11.45	0.355029
3/27/2018 3:05:00 AM.000	1126.8	0.62	3.16	0.86	0.25217	11.45	2.87347
3/27/2018 3:10:00 AM.000	721.7	1.21	2.96	0.82	0.22307	11.4525	2.75433
3/27/2018 3:15:00 AM.000	593.4	1.21	2.13	0.91	0.21744	11.4525	2.75489
3/27/2018 3:20:00 AM.000	559.7	0.57	2.11	1.18	0.05174	11.4525	0.47867
3/27/2018 3:25:00 AM.000	553.8	0.35	2.22	1.25	0.0012	11.455	0.0107392
3/27/2018 3:30:00 AM.000	562.3	0.88	1.59	1.26	0.00087	11.4525	0.0116755
3/27/2018 3:35:00 AM.000	554.8	1.11	1.16	1.35	0.00102	11.4525	0.0148459
3/27/2018 3:40:00 AM.000	560.5	0.84	1.14	1.53	0.00209	11.45	0.0302909
3/27/2018 3:45:00 AM.000	574.8	0	0.9	1.68	0.00328	11.45	0.0100579
3/27/2018 3:50:00 AM.000	562.3	-0.03	0.86	1.7	0.00872	11.4475	0.0137993
3/27/2018 3:55:00 AM.000	579.1	-0.03	1.36	1.64	0.04132	11.4475	0.0670294
3/27/2018 4:00:00 AM.000	588	-0.03	1.44	1.12	0.07886	11.4475	0.128326
3/27/2018 4:05:00 AM.000	568.1	-0.03	1.4	0.93	0.08916	11.4425	0.145127
3/27/2018 4:10:00 AM.000	570.2	0.01	1.87	0.82	0.10337	11.4425	0.168326
3/27/2018 4:15:00 AM.000	595.3	0.49	1.99	0.89	0.13851	11.4425	0.678268
3/27/2018 4:20:00 AM.000	852.9	0.49	1.8	0.95	0.14955	11.4375	1.55434
3/27/2018 4:25:00 AM.000	1171.9	0.78	1.83	0.91	0.15871	11.4375	1.93463
3/27/2018 4:30:00 AM.000	1234.8	0.92	1.98	0.94	0.26686	11.4375	2.56072
3/27/2018 4:35:00 AM.000	1229.4	0.66	1.86	1.07	0.31258	11.4375	3.2749
3/27/2018 4:40:00 AM.000	1251	0.69	1.18	1.31	0.27998	11.435	3.46729
3/27/2018 4:45:00 AM.000	1188.4	0.81	0.9	1.4	0.3209	11.435	4.01008
3/27/2018 4:50:00 AM.000	725	1	0.89	1.57	0.16817	11.44	2.09314
3/27/2018 4:55:00 AM.000	607.1	1.1	0.58	1.79	0.02209	11.4425	0.308591
3/27/2018 5:00:00 AM.000	602.6	0.35	0.16	1.96	0.00192	11.4375	0.0222685
3/27/2018 5:05:00 AM.000	591.5	-0.03	0.2	2.11	0.00206	11.4375	0.00292391
3/27/2018 5:10:00 AM.000	595	-0.03	0.41	1.79	0.00587	11.44	0.00914407
3/27/2018 5:15:00 AM.000	599.7	-0.03	0.51	1.57	0.02039	11.44	0.0328485
3/27/2018 5:20:00 AM.000	604.7	-0.03	0.6	1.27	0.05322	11.4425	0.0864497
3/27/2018 5:25:00 AM.000	624.9	-0.03	0.86	1	0.0662	11.4425	0.107641
3/27/2018 5:30:00 AM.000	625	-0.03	1.08	1.01	0.08222	11.4375	0.13378
3/27/2018 5:35:00 AM.000	612.6	0.33	1.2	0.93	0.12346	11.44	0.250527
3/27/2018 5:40:00 AM.000	614.7	1.11	1.26	1.04	0.21341	11.44	2.53314
3/27/2018 5:45:00 AM.000	627.1	1.36	1.14	1.11	0.25345	11.4425	2.80669
3/27/2018 5:50:00 AM.000	1032.5	0.7	0.6	1.24	0.30068	11.44	2.30117
3/27/2018 5:55:00 AM.000	1267.8	0.12	0.51	1.25	0.28895	11.4425	1.49152
3/27/2018 6:00:00 AM.000	1282.1	0.19	0.52	1.49	0.05355	11.44	0.292792
3/27/2018 6:05:00 AM.000	1243.8	0.11	0.27	1.56	0.00122	11.44	0.00706414
3/27/2018 6:10:00 AM.000	1260.4	-0.03	0.14	1.56	0.00087	11.44	0.00246504
3/27/2018 6:15:00 AM.000	1285.6	-0.03	0.27	1.42	0.00188	11.44	0.00263026
3/27/2018 6:20:00 AM.000	1263.5	-0.03	0.81	1.14	0.0043	11.44	0.006581
3/27/2018 6:25:00 AM.000	1013.1	-0.03	1.07	0.95	0.00937	11.4425	0.0148589
3/27/2018 6:30:00 AM.000	657.3	-0.03	1.31	0.94	0.03109	11.4425	0.0503196
3/27/2018 6:35:00 AM.000	580.3	-0.03	1.85	1.01	0.0621	11.44	0.100941
3/27/2018 6:40:00 AM.000	581.5	0.17	2.12	1.06	0.09023	11.4375	0.412221
3/27/2018 6:45:00 AM.000	566.7	0.47	2.09	0.93	0.14881	11.4375	1.59929
3/27/2018 6:50:00 AM.000	555.2	0.88	2.2	1.01	0.20864	11.4375	2.80437
3/27/2018 6:55:00 AM.000	645.2	1.09	1.89	0.94	0.23822	11.4375	2.98822
3/27/2018 7:00:00 AM.000	1094.5	0.74	1.43	0.99	0.17544	11.44	1.83984
3/27/2018 7:05:00 AM.000	1222.5	0.82	1.23	1.16	0.01415	11.4375	0.168885
3/27/2018 7:10:00 AM.000	1260.4	1.01	1.08	1.26	0.00049	11.4375	0.00607591
3/27/2018 7:15:00 AM.000	1255.3	0.31	0.68	1.44	0.00035	11.4375	0.0041553
3/27/2018 7:20:00 AM.000	1218.2	-0.03	0.56	1.64	0.00136	11.4375	0.00213791
3/27/2018 7:25:00 AM.000	1025.4	-0.03	0.83	1.49	0.00345	11.4375	0.005193
3/27/2018 7:30:00 AM.000	647.1	-0.03	1.44	1.11	0.00741	11.4375	0.0116575
3/27/2018 7:35:00 AM.000	565.2	-0.03	1.48	1.1	0.02857	11.4375	0.0461998
3/27/2018 7:40:00 AM.000	552.5	-0.03	1.62	1.09	0.06965	11.4375	0.11326
3/27/2018 7:45:00 AM.000	552.5	-0.03	2.21	1.09	0.09187	11.435	0.149524
3/27/2018 7:50:00 AM.000	571.2	0.01	2.37	1.13	0.11855	11.435	0.193075
3/27/2018 7:55:00 AM.000	578.4	0.82	2.35	1.09	0.20453	11.435	1.74736
3/27/2018 8:00:00 AM.000	578.5	1.23	2.41	1.1	0.24372	11.4325	2.77543
3/27/2018 8:05:00 AM.000	567.7	0.63	2.01	1.04	0.2557	11.43	2.1018
3/27/2018 8:10:00 AM.000	560.7	0.38	1.68	1.4	0.03706	11.43	0.346544
3/27/2018 8:15:00 AM.000	574.9	1.07	1.53	1.41	0.0007	11.4275	0.010024
3/27/2018 8:20:00 AM.000	568.1	0.95	1.28	1.31	0.00029	11.4275	0.00372955
3/27/2018 8:25:00 AM.000	572.9	0.05	0.84	1.48	0.00058	11.4275	0.00492677
3/27/2018 8:30:00 AM.000	946.6	-0.03	0.83	1.68	0.00236	11.4275	0.00341271
3/27/2018 8:35:00 AM.000	1233.5	-0.03	1.17	1.2	0.0032	11.43	0.00478394
3/27/2018 8:40:00 AM.000	1285.3	-0.03	1.44	0.89	0.00972	11.43	0.0154255
3/27/2018 8:45:00 AM.000	1250.4	-0.03	1.65	0.95	0.04997	11.43	0.0811195
3/27/2018 8:50:00 AM.000	1211.1	-0.03	2.12	0.97	0.06987	11.4275	0.113592
3/27/2018 8:55:00 AM.000	1203.5	-0.01	2.56	1.09	0.0979	11.4225	0.148173
3/27/2018 9:00:00 AM.000	802.3	0.36	2.76	1	0.16828	11.4225	1.82941
3/27/2018 9:05:00 AM.000	580.1	0.86	2.63	0.97	0.15055	11.425	1.83419
3/27/2018 9:10:00 AM.000	546.1	0.98	2.12	1.05	0.1264	11.4225	1.5654
3/27/2018 9:15:00 AM.000	543.1	0.78	1.95	1.05	0.00204	11.425	0.0231747
3/27/2018 9:20:00 AM.000	548.3	0.95	1.8	1.17	0.00029	11.4225	0.00325855
3/27/2018 9:25:00 AM.000	563.1	0.94	1.27	1.42	0.00029	11.4225	0.00362446
3/27/2018 9:30:00 AM.000	584.1	0.58	0.9	1.54	0.00029	11.4175	0.00328113
3/27/2018 9:35:00 AM.000	571.9	0.19	0.79	1.69	0.00104	11.4175	0.0116522
3/27/2018 9:40:00 AM.000	569.6	-0.03	0.69	1.68	0.0041	11.4175	0.00627205
3/27/2018 9:45:00 AM.000	665.5	-0.03	0.73	1.58	0.01191	11.4225	0.0189965
3/27/2018 9:50:00 AM.000	1098	-0.03	1	1.47	0.03309	11.42	0.053556
3/27/2018 9:55:00 AM.000	1260.4	-0.03	1.12	1.26	0.09015	11.42	0.146664
3/27/2018 10:00:00 AM.000	1286.6	-0.03	1.39	1.16	0.10195	11.4175	0.165909
3/27/2018 10:05:00 AM.000	1251.9	-0.03	1.85	1.11	0.12569	11.42	0.204657
3/27/2018 10:10:00 AM.000	1268.5	-0.03	2.16	0.91	0.19939	11.42	0.324918
3/27/2018 10:15:00 AM.000	1326.5	0.09	2.41	0.99	0.23322	11.415	0.540465
3/27/2018 10:20:00 AM.000	1317.2	0.74	2.77	1.05	0.2309	11.415	2.68679
3/27/2018 10:25:00 AM.000	1306.8	1.11	2.36	1.09	0.14307	11.415	1.87875
3/27/2018 10:30:00 AM.000	1313.2	0.62	1.79	1.18	0.00496	11.4125	0.0557085
3/27/2018 10:35:00 AM.000	1277.1	0.63	1.81	1.23	0.0003	11.4125	0.00324314
3/27/2018 10:40:00 AM.000	1292.1	1.13	1.7	1.16	0.00029	11.4075	0.0040681
3/27/2018 10:45:00 AM.000	1252.7	0.95	1.04	1.35	0.00029	11.4125	0.00397293
3/27/2018 10:50:00 AM.000	1248.1	0.67	0.74	1.59	0.00037	11.4075	0.00470955
3/27/2018 10:55:00 AM.000	1258.5	0.05	0.69	1.8	0.00087	11.4075	0.00658621
3/27/2018 11:00:00 AM.000	1288.2	-0.03	0.71	1.84	0.0057	11.405	0.00885873
3/27/2018 11:05:00 AM.000	1287.9	-0.03	1	1.68	0.02571	11.405	0.0414986
3/27/2018 11:10:00 AM.000	1312.1	-0.03	1.41	1.3	0.05073	11.4025	0.0823059
3/27/2018 11:15:00 AM.000	1354.6	-0.03	1.56	0.97	0.09171	11.4025	0.149148
3/27/2018 11:20:00 AM.000	1311.5	-0.03	1.99	0.95	0.09659	11.4025	0.157107
3/27/2018 11:25:00 AM.000	997.2	0.14	2.53	0.79	0.10278	11.3975	0.148408
3/27/2018 11:30:00 AM.000	668.2	0.11	2.64	0.87	0.20435	11.3975	1.61478
3/27/2018 11:35:00 AM.000	613.8	0.26	2.71	0.96	0.27473	11.3975	2.9121
3/27/2018 11:40:00 AM.000	629.3	0.9	2.47	0.9	0.3202	11.3975	4.03436
3/27/2018 11:45:00 AM.000	612.3	0.98	2.1	1.1	0.38235	11.3975	5.59823
3/27/2018 11:50:00 AM.000	627.4	0.84	1.85	1.23	0.32841	11.395	4.28401
3/27/2018 11:55:00 AM.000	639	1.19	1.55	1.2	0.08304	11.3975	1.21217
3/27/2018 12:00:00 PM.000	848.3	0.97	1.12	1.42	0.00203	11.395	0.0287909
3/27/2018 12:05:00 PM.000	1340.2	0.66	0.8	1.7	0.00186	11.3975	0.0249975
3/27/2018 12:10:00 PM.000	1400.3	0.02	0.63	1.9	0.00304	11.395	0.0177014
3/27/2018 12:15:00 PM.000	1294.6	-0.03	0.74	1.91	0.00976	11.3975	0.0154785
3/27/2018 12:20:00 PM.000	1273	-0.03	1.21	1.54	0.02294	11.3975	0.0369736
3/27/2018 12:25:00 PM.000	1316.6	-0.03	1.39	1.29	0.07007	11.3975	0.113837
3/27/2018 12:30:00 PM.000	1286.8	-0.03	1.59	1.11	0.08432	11.4	0.137086
3/27/2018 12:35:00 PM.000	1284.8	-0.03	2.22	1.11	0.10747	11.3975	0.174833
3/27/2018 12:40:00 PM.000	1307.6	-0.02	2.6	0.98	0.18191	11.4	0.296254
3/27/2018 12:45:00 PM.000	1224	0.28	2.77	0.9	0.24439	11.4	1.49804
3/27/2018 12:50:00 PM.000	1264.1	0.64	2.91	0.84	0.20722	11.3975	2.32718
3/27/2018 12:55:00 PM.000	1271.5	1.4	2.39	0.92	0.17486	11.4025	3.05023
3/27/2018 1:00:00 PM.000	1288.2	1.58	1.98	1.21	0.04107	11.3975	0.55961
3/27/2018 1:05:00 PM.000	1286.7	0.33	1.81	1.35	0.00058	11.4025	0.00340071
3/27/2018 1:10:00 PM.000	1233.8	0.27	1.64	1.33	0.00029	11.4	0.00179158
3/27/2018 1:15:00 PM.000	1261.3	0.46	1.19	1.48	0.00029	11.4025	0.00349032
3/27/2018 1:20:00 PM.000	1231.2	0.86	1.02	1.63	0.00079	11.405	0.0109104
3/27/2018 1:25:00 PM.000	1187.4	0.12	0.84	1.81	0.00132	11.4075	0.00959569
3/27/2018 1:30:00 PM.000	1171.6	-0.03	0.8	1.75	0.01142	11.4075	0.0181902
3/27/2018 1:35:00 PM.000	1138	-0.03	1.28	1.53	0.01898	11.4125	0.0305263
3/27/2018 1:40:00 PM.000	1151.1	-0.03	1.6	1.27	0.0474	11.4125	0.0768927
3/27/2018 1:45:00 PM.000	1141.9	-0.03	1.67	1.14	0.09415	11.415	0.153173
3/27/2018 1:50:00 PM.000	1129.9	-0.03	2.13	1.08	0.11082	11.4175	0.180382
3/27/2018 1:55:00 PM.000	1138	-0.03	2.63	1.28	0.14623	11.4175	0.238159
3/27/2018 2:00:00 PM.000	1130.1	0.52	2.77	1.16	0.22628	11.42	1.47752
3/27/2018 2:05:00 PM.000	1118.6	1.34	2.76	1.19	0.25788	11.4225	3.79554
3/27/2018 2:10:00 PM.000	1091.8	1.32	2.4	1.19	0.29746	11.425	3.5872
3/27/2018 2:15:00 PM.000	1089.6	0.54	2	1.31	0.29573	11.4275	2.34038
3/27/2018 2:20:00 PM.000	1063.1	0.67	1.86	1.27	0.08288	11.425	0.771014
3/27/2018 2:25:00 PM.000	1073.3	0.85	1.64	1.37	0.00119	11.425	0.0138033
3/27/2018 2:30:00 PM.000	1061.4	0.86	1.14	1.71	0.00087	11.4275	0.0114822
3/27/2018 2:35:00 PM.000	1038.8	0.87	0.88	1.94	0.00109	11.4275	0.0113944
3/27/2018 2:40:00 PM.000	1033.7	0	0.76	2.12	0.00265	11.425	0.0113974
3/27/2018 2:45:00 PM.000	1001	-0.03	0.81	1.95	0.01335	11.4325	0.0213515
3/27/2018 2:50:00 PM.000	1005.7	-0.03	1.27	1.73	0.02824	11.4325	0.0456557
3/27/2018 2:55:00 PM.000	1015.9	-0.03	1.45	1.45	0.06717	11.4325	0.109199
3/27/2018 3:00:00 PM.000	999.8	-0.03	1.58	1.24	0.09098	11.435	0.148071
3/27/2018 3:05:00 PM.000	1000.2	-0.03	2.07	1.02	0.10069	11.4375	0.163931
3/27/2018 3:10:00 PM.000	1022.3	-0.03	2.39	0.93	0.13633	11.435	0.222098
3/27/2018 3:15:00 PM.000	810	0.01	2.53	0.96	0.21992	11.4375	0.291073
3/27/2018 3:20:00 PM.000	734.3	0.12	2.88	0.97	0.27358	11.44	2.38514
3/27/2018 3:25:00 PM.000	666.1	0.97	2.64	0.96	0.32094	11.44	3.91469
3/27/2018 3:30:00 PM.000	821.5	1.5	2.07	0.95	0.35712	11.44	4.25778
3/27/2018 3:35:00 PM.000	644.8	0.74	1.92	1.07	0.31616	11.44	2.59589
3/27/2018 3:40:00 PM.000	854.4	0.71	1.86	1.23	0.22119	11.44	1.97803
3/27/2018 3:45:00 PM.000	1080.7	1.54	1.23	1.4	0.14629	11.4425	2.0798
3/27/2018 3:50:00 PM.000	1078.4	1.07	0.86	1.59	0.0495	11.4375	0.486847
3/27/2018 3:55:00 PM.000	1052.5	0.06	0.77	1.77	0.05032	11.44	0.225166
3/27/2018 4:00:00 PM.000	1005.5	-0.03	0.7	1.81	0.05535	11.44	0.0899219
3/27/2018 4:05:00 PM.000	967.5	-0.03	0.91	1.9	0.10913	11.44	0.17772
3/27/2018 4:10:00 PM.000	889.6	-0.03	1.35	1.68	0.12837	11.44	0.20913
3/27/2018 4:15:00 PM.000	852.3	-0.03	1.39	1.41	0.11528	11.44	0.18776
3/27/2018 4:20:00 PM.000	847.3	-0.03	1.62	1.26	0.16067	11.44	0.26186
3/27/2018 4:25:00 PM.000	821.4	-0.03	2.13	1.09	0.18597	11.44	0.303164
3/27/2018 4:30:00 PM.000	830.6	0	2.34	1.05	0.23812	11.435	0.388254
3/27/2018 4:35:00 PM.000	812.3	0.53	2.46	1	0.29543	11.435	1.64738
3/27/2018 4:40:00 PM.000	804.6	0.9	2.56	0.96	0.32508	11.435	3.37574
3/27/2018 4:45:00 PM.000	782.5	1.24	2.02	0.95	0.34936	11.435	5.6509
3/27/2018 4:50:00 PM.000	856.2	1.77	1.6	1.15	0.31274	11.435	4.29686
3/27/2018 4:55:00 PM.000	829.6	0.59	1.43	1.41	0.22271	11.435	1.41685
3/27/2018 5:00:00 PM.000	832.5	0.09	1.23	1.5	0.03576	11.4325	0.164756
3/27/2018 5:05:00 PM.000	954.1	-0.03	0.92	1.56	0.00203	11.4325	0.00218915
3/27/2018 5:10:00 PM.000	943.8	-0.03	1.01	1.46	0.00206	11.4325	0.0029235
3/27/2018 5:15:00 PM.000	946.2	-0.03	1.51	1.25	0.00613	11.43	0.00956614
3/27/2018 5:20:00 PM.000	947.3	-0.03	1.73	1.05	0.01393	11.43	0.0222969
3/27/2018 5:25:00 PM.000	949.4	-0.03	1.87	0.94	0.01857	11.4325	0.0298719
3/27/2018 5:30:00 PM.000	935.7	-0.03	2.37	0.89	0.03317	11.43	0.0536994
3/27/2018 5:35:00 PM.000	929.6	-0.02	2.78	0.91	0.06224	11.43	0.0790328
3/27/2018 5:40:00 PM.000	956.6	0.16	2.85	0.88	0.10843	11.4275	0.848988
3/27/2018 5:45:00 PM.000	890	0.63	3.04	0.86	0.15634	11.425	1.53559
3/27/2018 5:50:00 PM.000	849	0.74	2.89	1	0.1679	11.425	1.35293
3/27/2018 5:55:00 PM.000	709.6	0.5	2.32	1.13	0.18206	11.425	1.60901
3/27/2018 6:00:00 PM.000	731.4	0.87	2.15	1.29	0.09653	11.425	1.2447
3/27/2018 6:05:00 PM.000	763.3	1.37	2.05	1.36	0.00138	11.425	0.019575
3/27/2018 6:10:00 PM.000	799.4	1.12	1.47	1.51	0.00059	11.425	0.00669834
3/27/2018 6:15:00 PM.000	903.5	0.93	1.05	1.7	0.00087	11.425	0.0104686
3/27/2018 6:20:00 PM.000	991.2	0.87	0.89	1.83	0.00205	11.425	0.0269584
3/27/2018 6:25:00 PM.000	972	0	0.72	2.02	0.00444	11.425	0.0117005
3/27/2018 6:30:00 PM.000	798.6	-0.03	0.81	2.11	0.01007	11.425	0.0159948
3/27/2018 6:35:00 PM.000	779.9	-0.03	1.35	1.99	0.04029	11.425	0.0653125
3/27/2018 6:40:00 PM.000	750.9	-0.03	1.39	1.61	0.0734	11.425	0.119346
3/27/2018 6:45:00 PM.000	754.1	-0.03	1.48	1.4	0.08083	11.425	0.131472
3/27/2018 6:50:00 PM.000	743.2	-0.03	2.05	1.27	0.10793	11.4275	0.175708
3/27/2018 6:55:00 PM.000	752.3	-0.03	2.31	1.1	0.20221	11.425	0.329558
3/27/2018 7:00:00 PM.000	886.8	0.26	2.41	1.12	0.23805	11.42	0.235557
3/27/2018 7:05:00 PM.000	901.9	0.94	2.69	1.24	0.27149	11.42	2.64686
3/27/2018 7:10:00 PM.000	865.7	1.05	2.5	1.2	0.29842	11.42	2.97136
3/27/2018 7:15:00 PM.000	757.1	0.8	1.78	1.14	0.2604	11.42	2.30034
3/27/2018 7:20:00 PM.000	798.8	0.77	1.72	1.2	0.13353	11.4175	1.08158
3/27/2018 7:25:00 PM.000	828.3	0.83	1.67	1.37	0.00193	11.415	0.0178054
3/27/2018 7:30:00 PM.000	848.9	0.79	1.09	1.5	0.00087	11.415	0.0105352
3/27/2018 7:35:00 PM.000	922.6	1.19	0.75	1.68	0.00166	11.415	0.0228485
3/27/2018 7:40:00 PM.000	930.8	0.33	0.66	1.92	0.00268	11.415	0.0246141
3/27/2018 7:45:00 PM.000	907.8	-0.03	0.62	1.96	0.00478	11.4125	0.00735945
3/27/2018 7:50:00 PM.000	835.2	-0.03	0.85	1.85	0.0161	11.4125	0.0258277
3/27/2018 7:55:00 PM.000	733.3	-0.03	1.27	1.61	0.05214	11.4125	0.0846259
3/27/2018 8:00:00 PM.000	774.4	-0.03	1.36	1.27	0.06878	11.4075	0.11176
3/27/2018 8:05:00 PM.000	793.9	-0.03	1.6	1.12	0.07278	11.405	0.118278
3/27/2018 8:10:00 PM.000	806.8	-0.03	2.1	0.95	0.13011	11.4025	0.211781
3/27/2018 8:15:00 PM.000	946.9	-0.02	2.29	0.86	0.22099	11.4	0.359993
3/27/2018 8:20:00 PM.000	1019.9	0.2	2.48	0.89	0.25229	11.4	1.49631
3/27/2018 8:25:00 PM.000	996.5	0.55	2.6	0.95	0.26074	11.395	2.10646
3/27/2018 8:30:00 PM.000	948.6	0.65	2.04	0.95	0.2858	11.3925	2.30022
3/27/2018 8:35:00 PM.000	786.6	0.54	1.84	1.06	0.17715	11.385	1.68469
3/27/2018 8:40:00 PM.000	803.4	0.91	1.87	1.06	0.0197	11.3825	0.288741
3/27/2018 8:45:00 PM.000	835.6	1.59	1.39	1.11	0.00087	11.38	0.0123024
3/27/2018 8:50:00 PM.000	858.8	1.42	0.89	1.5	0.00087	11.3775	0.0101422
3/27/2018 8:55:00 PM.000	878.3	0.93	0.7	1.72	0.00184	11.3725	0.0276518
3/27/2018 9:00:00 PM.000	847.3	0.02	0.55	1.86	0.00574	11.3725	0.0347526
3/27/2018 9:05:00 PM.000	837.7	-0.03	0.55	1.93	0.02108	11.37	0.0339177
3/27/2018 9:10:00 PM.000	832.3	-0.03	1.01	1.76	0.03128	11.3625	0.0505328
3/27/2018 9:15:00 PM.000	964.6	-0.03	1.15	1.55	0.07344	11.36	0.119227
3/27/2018 9:20:00 PM.000	920.8	-0.03	1.27	1.3	0.10547	11.36	0.171418
3/27/2018 9:25:00 PM.000	954	-0.03	1.86	1.15	0.14265	11.355	0.231973
3/27/2018 9:30:00 PM.000	963.7	-0.03	2.2	1.09	0.18404	11.35	0.299372
3/27/2018 9:35:00 PM.000	826.2	0.35	2.39	1.02	0.25036	11.35	0.572816
3/27/2018 9:40:00 PM.000	875.5	1.45	2.59	0.92	0.29518	11.345	3.72586
3/27/2018 9:45:00 PM.000	849.3	1.49	2.16	0.99	0.32208	11.345	3.75063
3/27/2018 9:50:00 PM.000	835.6	0.42	1.61	1.24	0.32092	11.34	2.2003
3/27/2018 9:55:00 PM.000	859.8	0.54	1.67	1.32	0.15111	11.3375	1.00725
3/27/2018 10:00:00 PM.000	873.1	0.73	1.56	1.36	0.00216	11.3375	0.0214862
3/27/2018 10:05:00 PM.000	869.4	0.7	1	1.54	0.00087	11.33	0.00888436
3/27/2018 10:10:00 PM.000	941.4	1.12	0.76	1.69	0.0018	11.33	0.0197023
3/27/2018 10:15:00 PM.000	1008.1	0.1	0.69	1.87	0.00251	11.3275	0.0154517
3/27/2018 10:20:00 PM.000	1023.9	-0.03	0.71	1.86	0.00811	11.32	0.012763
3/27/2018 10:25:00 PM.000	1006.1	-0.03	1.14	1.68	0.02072	11.315	0.0332868
3/27/2018 10:30:00 PM.000	970.2	-0.03	1.51	1.36	0.06199	11.315	0.100462
3/27/2018 10:35:00 PM.000	896.8	-0.03	1.66	1.18	0.08532	11.3125	0.138428
3/27/2018 10:40:00 PM.000	923.8	-0.03	2.14	1	0.09775	11.3075	0.15864
3/27/2018 10:45:00 PM.000	874	-0.03	2.63	0.91	0.13241	11.305	0.215034
3/27/2018 10:50:00 PM.000	870.3	-0.01	2.91	0.92	0.19861	11.3025	0.5524
3/27/2018 10:55:00 PM.000	950.8	0.45	3.11	0.86	0.25476	11.3	2.94882
3/27/2018 11:00:00 PM.000	944.2	1.45	2.9	0.89	0.29488	11.3	4.03841
3/27/2018 11:05:00 PM.000	921.7	1.48	2.32	0.99	0.3349	11.2925	4.10946
3/27/2018 11:10:00 PM.000	903.3	0.87	2.1	1.14	0.28879	11.29	2.91628
3/27/2018 11:15:00 PM.000	841.7	0.75	2	1.37	0.07329	11.29	0.599645
3/27/2018 11:20:00 PM.000	793.7	0.36	1.51	1.47	0.00144	11.2825	0.00766936
3/27/2018 11:25:00 PM.000	850	0.39	1.26	1.61	0.00087	11.2825	0.00708755
3/27/2018 11:30:00 PM.000	865.7	0.49	1.15	1.76	0.00127	11.28	0.0145155
3/27/2018 11:35:00 PM.000	865.9	-0.01	0.96	1.85	0.00267	11.275	0.00671391
3/27/2018 11:40:00 PM.000	898.5	-0.03	1.19	1.73	0.01057	11.2725	0.0167481
3/27/2018 11:45:00 PM.000	964.6	-0.03	1.75	1.5	0.03043	11.2725	0.0490417
3/27/2018 11:50:00 PM.000	1023.5	-0.03	1.87	1.22	0.07217	11.27	0.116907
3/27/2018 11:55:00 PM.000	984.2	-0.03	2.09	1	0.0786	11.27	0.127362
3/28/2018 12:00:00 AM.000	942	-0.03	2.75	0.87	0.07673	11.265	0.124306
3/28/2018 12:05:00 AM.000	921.3	0.18	3.05	0.8	0.14004	11.265	0.870281
3/28/2018 12:10:00 AM.000	791.5	0.34	3.01	0.87	0.1641	11.2625	1.91888
3/28/2018 12:15:00 AM.000	861.9	0.56	3.18	0.91	0.15665	11.26	1.76392
3/28/2018 12:20:00 AM.000	837.1	0.86	3.37	0.99	0.23916	11.2575	3.28205
3/28/2018 12:25:00 AM.000	871.6	1.2	3.16	1.07	0.31587	11.2525	4.03016
3/28/2018 12:30:00 AM.000	892.5	1.33	2.35	1.24	0.32191	11.25	4.618
3/28/2018 12:35:00 AM.000	895.5	0.94	2.08	1.52	0.38516	11.2475	4.68183
3/28/2018 12:40:00 AM.000	920.3	0.93	2	1.66	0.33262	11.245	4.05552
3/28/2018 12:45:00 AM.000	1012.9	1.12	1.56	1.81	0.20744	11.2425	2.667
3/28/2018 12:50:00 AM.000	1007.1	0.94	1	2.14	0.16442	11.2375	1.95135
3/28/2018 12:55:00 AM.000	983.4	0.77	0.9	2.4	0.05739	11.2375	0.873858
3/28/2018 1:00:00 AM.000	906.4	0.04	0.75	2.49	0.03038	11.2325	0.201642
3/28/2018 1:05:00 AM.000	931.6	-0.03	0.75	2.47	0.0452	11.2325	0.0729889
3/28/2018 1:10:00 AM.000	925.9	-0.03	1.28	2.22	0.06473	11.2275	0.104703
3/28/2018 1:15:00 AM.000	926.7	-0.03	1.48	1.92	0.08191	11.225	0.132601
3/28/2018 1:20:00 AM.000	924	-0.03	1.61	1.6	0.12024	11.225	0.194858
3/28/2018 1:25:00 AM.000	924.1	-0.03	2.11	1.36	0.13221	11.2225	0.214287
3/28/2018 1:30:00 AM.000	939.7	-0.03	2.56	1.1	0.20945	11.2175	0.339695
3/28/2018 1:35:00 AM.000	1030.4	-0.02	2.76	1.01	0.28868	11.215	0.312909
3/28/2018 1:40:00 AM.000	952.8	0.12	3.04	1	0.32136	11.215	2.66094
3/28/2018 1:45:00 AM.000	963	0.64	2.81	1.14	0.33802	11.2075	4.17719
3/28/2018 1:50:00 AM.000	939.2	0.92	2.3	1.29	0.32396	11.205	3.76333
3/28/2018 1:55:00 AM.000	910	1.06	2.21	1.21	0.13093	11.205	1.50453
3/28/2018 2:00:00 AM.000	976	1.53	2	1.33	0.00189	11.2	0.0303499
3/28/2018 2:05:00 AM.000	1007.7	1.49	1.37	1.42	0.00087	11.195	0.0127364
3/28/2018 2:10:00 AM.000	1011.6	0.43	1.01	1.74	0.00087	11.195	0.00684471
3/28/2018 2:15:00 AM.000	1017.1	0	0.98	2.1	0.00156	11.1925	0.00697736
3/28/2018 2:20:00 AM.000	1014.2	-0.03	0.98	1.9	0.00331	11.1875	0.00493188
3/28/2018 2:25:00 AM.000	1051.9	-0.03	1.37	1.54	0.01913	11.1825	0.0306007
3/28/2018 2:30:00 AM.000	1076.6	-0.03	1.88	1.26	0.04278	11.1825	0.0689751
3/28/2018 2:35:00 AM.000	1023.8	-0.03	2.05	1.11	0.0704	11.1825	0.113791
3/28/2018 2:40:00 AM.000	1005.7	-0.03	2.37	1.02	0.07141	11.1775	0.115416
3/28/2018 2:45:00 AM.000	857.7	-0.02	3.05	0.92	0.09893	11.1725	0.13184
3/28/2018 2:50:00 AM.000	894.8	0.2	3.29	0.92	0.15374	11.17	1.63278
3/28/2018 2:55:00 AM.000	910.2	0.34	3.21	0.84	0.16726	11.1675	2.01831
3/28/2018 3:00:00 AM.000	914.9	0.41	3.49	0.96	0.15634	11.1625	1.69761
3/28/2018 3:05:00 AM.000	914.2	0.65	3.66	0.92	0.23975	11.165	3.21673
3/28/2018 3:10:00 AM.000	913.4	1.26	3.55	1.04	0.32893	11.16	5.88122
3/28/2018 3:15:00 AM.000	934.3	1.64	2.8	1.34	0.32657	11.1575	5.21998
3/28/2018 3:20:00 AM.000	999.9	1.34	2.33	1.54	0.38528	11.1575	5.2849
3/28/2018 3:25:00 AM.000	913	1.01	2.21	1.74	0.35682	11.1525	4.72065
3/28/2018 3:30:00 AM.000	906.2	0.97	1.83	1.8	0.21231	11.155	2.94798
3/28/2018 3:35:00 AM.000	814.7	1.11	1.23	2.02	0.15291	11.1475	2.24274
3/28/2018 3:40:00 AM.000	914.2	1.04	0.97	2.21	0.06557	11.1475	0.824006
3/28/2018 3:45:00 AM.000	936.7	0.16	0.81	2.49	0.01788	11.1425	0.134395
3/28/2018 3:50:00 AM.000	938.5	-0.03	0.74	2.65	0.03019	11.14	0.0484971
3/28/2018 3:55:00 AM.000	982.3	-0.03	1.23	2.28	0.07713	11.14	0.124585
3/28/2018 4:00:00 AM.000	988.9	-0.03	1.58	1.96	0.09431	11.1375	0.152424
3/28/2018 4:05:00 AM.000	1032.5	-0.03	1.61	1.59	0.12365	11.13	0.199945
3/28/2018 4:10:00 AM.000	1045	-0.03	2.06	1.43	0.12716	11.13	0.205633
3/28/2018 4:15:00 AM.000	1063.8	-0.03	2.58	1.14	0.16526	11.13	0.267377
3/28/2018 4:20:00 AM.000	1017.1	0.01	2.83	0.94	0.25769	11.1275	0.417142
3/28/2018 4:25:00 AM.000	1028.8	0.67	3.09	0.92	0.30321	11.125	2.6677
3/28/2018 4:30:00 AM.000	983.1	1.25	3.16	0.95	0.33382	11.1225	4.51263
3/28/2018 4:35:00 AM.000	970.9	1.03	2.38	1.05	0.31681	11.12	3.81327
3/28/2018 4:40:00 AM.000	956.5	0.81	2.07	1.2	0.2216	11.115	2.75955
3/28/2018 4:45:00 AM.000	935.7	0.97	2.06	1.39	0.00598	11.1125	0.0775908
3/28/2018 4:50:00 AM.000	929.1	1.19	1.69	1.54	0.00087	11.1125	0.0128939
3/28/2018 4:55:00 AM.000	928.1	1.18	1.04	1.58	0.00087	11.11	0.0109465
3/28/2018 5:00:00 AM.000	939.4	0.97	0.83	1.86	0.00112	11.105	0.00977901
3/28/2018 5:05:00 AM.000	950	0.02	0.76	2.11	0.0021	11.1025	0.00795603
3/28/2018 5:10:00 AM.000	952.9	-0.03	0.71	2.1	0.01886	11.1025	0.0301044
3/28/2018 5:15:00 AM.000	943.4	-0.03	1.2	1.83	0.03481	11.1	0.0559324
3/28/2018 5:20:00 AM.000	933.9	-0.03	1.55	1.52	0.05731	11.1	0.0923694
3/28/2018 5:25:00 AM.000	890.5	-0.03	1.63	1.23	0.08956	11.0925	0.14457
3/28/2018 5:30:00 AM.000	901.3	-0.03	2.08	1.02	0.12867	11.09	0.207882
3/28/2018 5:35:00 AM.000	865.8	-0.03	2.59	1.02	0.15016	11.0875	0.242661
3/28/2018 5:40:00 AM.000	872.1	-0.02	2.82	1.03	0.2108	11.0875	0.340833
3/28/2018 5:45:00 AM.000	861.9	0.13	3.08	1.2	0.28151	11.0875	1.60021
3/28/2018 5:50:00 AM.000	777.2	0.72	3.3	1.15	0.32516	11.0775	4.28934
3/28/2018 5:55:00 AM.000	592.6	1.26	2.59	1.06	0.35154	11.0775	4.17952
3/28/2018 6:00:00 AM.000	520.7	0.99	2.26	1.03	0.34516	11.0775	3.60572
3/28/2018 6:05:00 AM.000	495.4	1.05	2.24	1.23	0.12615	11.0725	1.60825
3/28/2018 6:10:00 AM.000	493.9	1.05	1.81	1.35	0.00192	11.0725	0.0238503
3/28/2018 6:15:00 AM.000	497.9	0.92	1.22	1.52	0.00156	11.065	0.0194703
3/28/2018 6:20:00 AM.000	494.5	0.85	1.01	1.85	0.00205	11.065	0.0194023
3/28/2018 6:25:00 AM.000	499.8	0.01	0.91	1.87	0.00467	11.0625	0.0243015
3/28/2018 6:30:00 AM.000	486.5	-0.03	0.79	1.77	0.01998	11.06	0.0318855
3/28/2018 6:35:00 AM.000	494.5	-0.03	1.11	1.62	0.03698	11.0575	0.0593861
3/28/2018 6:40:00 AM.000	501	-0.03	1.32	1.45	0.07698	11.05	0.124076
3/28/2018 6:45:00 AM.000	499.4	-0.03	1.28	1.29	0.11035	11.05	0.178052
3/28/2018 6:50:00 AM.000	514.5	-0.03	1.57	1.02	0.12822	11.05	0.206956
3/28/2018 6:55:00 AM.000	520	-0.03	1.88	0.98	0.1571	11.0475	0.253655
3/28/2018 7:00:00 AM.000	521.9	0.06	1.94	1.05	0.213	11.0425	0.27778
3/28/2018 7:05:00 AM.000	507.5	0.46	1.99	1.1	0.26542	11.04	2.85308
3/28/2018 7:10:00 AM.000	508	0.98	1.85	1.23	0.32188	11.0375	4.02889
3/28/2018 7:15:00 AM.000	513.9	1.28	1.34	1.03	0.35629	11.035	4.33001
3/28/2018 7:20:00 AM.000	510.8	1.09	1.03	1.15	0.30671	11.035	3.59582
3/28/2018 7:25:00 AM.000	524.4	1.02	0.88	1.22	0.23591	11.0325	2.72789
3/28/2018 7:30:00 AM.000	961	0.42	0.51	1.45	0.01956	11.03	0.13385
3/28/2018 7:35:00 AM.000	1325.2	-0.03	0.39	1.7	0.01791	11.025	0.0285124
3/28/2018 7:40:00 AM.000	1350.8	-0.03	0.54	1.72	0.01281	11.025	0.020268
3/28/2018 7:45:00 AM.000	1315.5	-0.03	1.1	1.53	0.01554	11.0225	0.0246797
3/28/2018 7:50:00 AM.000	830.5	-0.03	1.36	1.21	0.05215	11.02	0.0838529
3/28/2018 7:55:00 AM.000	596	-0.03	1.68	1.11	0.06525	11.0175	0.105021
3/28/2018 8:00:00 AM.000	554.3	-0.03	2.26	1.05	0.07069	11.015	0.113806
3/28/2018 8:05:00 AM.000	545.6	0.04	2.51	1.11	0.09487	11.0125	0.152876
3/28/2018 8:10:00 AM.000	531.1	0.72	2.62	1.18	0.1554	11.0125	1.47768
3/28/2018 8:15:00 AM.000	552.2	0.82	2.5	1.18	0.13374	11.0075	1.57989
3/28/2018 8:20:00 AM.000	558.3	0.87	2.03	1.17	0.15423	11.0075	1.79247
3/28/2018 8:25:00 AM.000	568.6	1.16	1.82	1.22	0.11137	11.005	1.40524
3/28/2018 8:30:00 AM.000	586.5	1.02	1.56	1.34	0.00286	11.005	0.0343062
3/28/2018 8:35:00 AM.000	557.7	0.84	1.11	1.52	0.00029	11	0.00319655
3/28/2018 8:40:00 AM.000	563.8	0.36	0.75	1.59	0.00119	10.9975	0.0120514
3/28/2018 8:45:00 AM.000	550	-0.02	0.73	1.85	0.00297	10.9975	0.00619815
3/28/2018 8:50:00 AM.000	548.6	-0.03	0.89	1.84	0.00388	10.995	0.00582769
3/28/2018 8:55:00 AM.000	564.6	-0.03	1.09	1.65	0.01734	10.99	0.0275676
3/28/2018 9:00:00 AM.000	583.8	-0.03	1.17	1.47	0.06897	10.99	0.110961
3/28/2018 9:05:00 AM.000	557.4	-0.03	1.42	1.21	0.08169	10.985	0.13149
3/28/2018 9:10:00 AM.000	576.9	-0.03	1.73	1.06	0.09527	10.985	0.153422
3/28/2018 9:15:00 AM.000	578	-0.03	1.85	0.89	0.12012	10.985	0.193555
3/28/2018 9:20:00 AM.000	876.3	0.31	2.11	0.86	0.10506	10.9825	0.164052
3/28/2018 9:25:00 AM.000	1231	1.12	2.21	0.97	0.08726	10.98	0.87672
3/28/2018 9:30:00 AM.000	1223.6	0.57	2.24	1.01	0.08741	10.9825	0.848808
3/28/2018 9:35:00 AM.000	1203.7	0.54	2.34	0.97	0.08426	10.9825	1.03622
3/28/2018 9:40:00 AM.000	1211.1	0.81	2.48	1.27	0.07084	10.9875	1.1107
3/28/2018 9:45:00 AM.000	1159.9	1.14	2.39	1.26	0.02135	10.9875	0.325456
3/28/2018 9:50:00 AM.000	647.7	1.63	1.62	1.37	0.00808	10.9875	0.112283
3/28/2018 9:55:00 AM.000	182.6	1.16	1.15	1.91	0.0083	10.9875	0.0976855
3/28/2018 10:00:00 AM.000	102.6	0.7	1.09	2.02	0.00288	10.9875	0.0367264
3/28/2018 10:05:00 AM.000	361.9	1.28	0.79	1.97	9e-05	10.99	0.00141255
3/28/2018 10:10:00 AM.000	553.5	0.43	0.29	2.1	0.00029	10.9875	0.00286327
3/28/2018 10:15:00 AM.000	598.1	1.41	0.29	2.55	0.00087	10.905	0.000962118
3/28/2018 10:20:00 AM.000	590.7	0.13	0.63	2.33	0.00696	10.9675	0.0107957
3/28/2018 10:25:00 AM.000	849.5	-0.03	0.61	1.73	0.03136	10.98	0.0502007
3/28/2018 10:30:00 AM.000	1225.2	-0.03	0.6	1.37	0.07446	10.985	0.119814
3/28/2018 10:35:00 AM.000	1275.1	-0.03	0.93	1.05	0.08446	10.9625	0.135891
3/28/2018 10:40:00 AM.000	1242.9	-0.03	1.31	0.76	0.08178	10.925	0.131448
3/28/2018 10:45:00 AM.000	1234.2	0.01	1.52	0.5	0.13153	10.9675	0.211894
3/28/2018 10:50:00 AM.000	1197.5	0.12	1.87	0.44	0.18665	10.98	1.06295
3/28/2018 10:55:00 AM.000	1240.1	0.25	2.24	0.56	0.14597	10.9825	1.27167
3/28/2018 11:00:00 AM.000	1131.9	0.86	1.48	0.56	0.07865	10.985	0.962035
3/28/2018 11:05:00 AM.000	702.2	1.18	1.12	0.65	0.00144	10.985	0.0177412
3/28/2018 11:10:00 AM.000	547.3	0.97	1.14	0.65	0.00028	10.985	0.00347112
3/28/2018 11:15:00 AM.000	531.9	0.82	0.88	0.71	0	10.985	0
3/28/2018 11:20:00 AM.000	532.7	0.19	0.36	1.08	0	10.9825	0
3/28/2018 11:25:00 AM.000	545.6	-0.03	0.43	1.13	0	10.9825	-0.000440078
3/28/2018 11:30:00 AM.000	546.2	-0.03	0.76	0.98	0.00045	10.9825	0.000286634
3/28/2018 11:35:00 AM.000	537.9	-0.03	0.81	0.82	0.00562	10.9825	0.00863575
3/28/2018 11:40:00 AM.000	591.7	-0.03	0.83	0.54	0.03057	10.9825	0.0489279
3/28/2018 11:45:00 AM.000	1004.1	-0.03	1.17	0.59	0.04864	10.985	0.0781141
3/28/2018 11:50:00 AM.000	1222.7	0.04	1.41	0.45	0.05737	10.985	0.072251
3/28/2018 11:55:00 AM.000	1256.2	0.21	1.43	0.41	0.07584	10.9875	0.770962
3/28/2018 12:00:00 PM.000	1247.1	0.31	1.63	0.28	0.09044	10.985	1.04443
3/28/2018 12:05:00 PM.000	1241.1	0.66	1.77	0.46	0.11546	10.9875	0.924225
3/28/2018 12:10:00 PM.000	1260.7	1.01	1.72	0.62	0.19526	10.99	2.80405
3/28/2018 12:15:00 PM.000	1270.7	1.55	1.36	0.53	0.20497	10.99	2.94931
3/28/2018 12:20:00 PM.000	1235.4	1.14	0.78	0.88	0.16962	10.99	1.86496
3/28/2018 12:25:00 PM.000	1088.5	0.53	0.6	1.15	0.12089	10.9875	1.41406
3/28/2018 12:30:00 PM.000	1085.1	0.77	0.52	1.18	0.0062	10.99	0.0855435
3/28/2018 12:35:00 PM.000	1080.7	0.96	0.19	1.3	0	10.99	0
3/28/2018 12:40:00 PM.000	1086.2	0.03	0.09	1.55	0	10.99	0
3/28/2018 12:45:00 PM.000	1062	-0.03	0.11	1.63	0.00089	10.9925	0.000997564
3/28/2018 12:50:00 PM.000	1089.9	-0.03	0.46	1.45	0.00731	10.99	0.0113671
3/28/2018 12:55:00 PM.000	1123.1	-0.03	0.63	1.05	0.01815	10.9925	0.0288776
3/28/2018 1:00:00 PM.000	1123.8	-0.03	0.75	0.79	0.03818	10.9925	0.0612321
3/28/2018 1:05:00 PM.000	1111.9	-0.03	1.26	0.73	0.07047	10.9925	0.11339
3/28/2018 1:10:00 PM.000	1076.9	0.09	1.64	0.68	0.09169	10.9925	0.371464
3/28/2018 1:15:00 PM.000	1037	0.57	1.63	0.39	0.15451	10.9925	1.46757
3/28/2018 1:20:00 PM.000	1043.9	1.03	1.72	0.18	0.20835	10.99	2.908
3/28/2018 1:25:00 PM.000	1017.9	1.26	1.37	0.22	0.22145	10.9875	2.51124
3/28/2018 1:30:00 PM.000	1000.8	0.7	0.86	0.46	0.20529	10.99	1.85537
3/28/2018 1:35:00 PM.000	955.5	0.61	0.73	0.78	0.02541	10.99	0.242758
3/28/2018 1:40:00 PM.000	963.1	0.92	0.64	0.94	0.00012	10.985	0.00118022
3/28/2018 1:45:00 PM.000	963.4	0.15	0.28	1.24	0	10.9825	0
3/28/2018 1:50:00 PM.000	954.1	-0.03	0.22	1.38	0.0011	10.9825	0.00133633
3/28/2018 1:55:00 PM.000	990.3	-0.03	0.48	1.15	0.00271	10.9825	0.00393635
3/28/2018 2:00:00 PM.000	1077.2	-0.03	0.87	1	0.00661	10.985	0.0102352
3/28/2018 2:05:00 PM.000	1015.5	-0.03	0.92	0.77	0.03952	10.9825	0.0633814
3/28/2018 2:10:00 PM.000	868.3	-0.03	1.21	0.55	0.0645	10.9825	0.103722
3/28/2018 2:15:00 PM.000	873.3	0	1.77	0.39	0.08006	10.985	0.128858
3/28/2018 2:20:00 PM.000	699.9	0.69	1.88	0.49	0.1027	10.985	0.898055
3/28/2018 2:25:00 PM.000	700.1	1.05	1.79	0.49	0.11575	10.985	1.5704
3/28/2018 2:30:00 PM.000	819.4	0.95	1.81	0.45	0.1117	10.9925	1.10521
3/28/2018 2:35:00 PM.000	831.7	0.4	1.87	0.6	0.21529	10.9925	1.85428
3/28/2018 2:40:00 PM.000	827.2	0.81	1.77	0.73	0.28694	10.9925	3.52894
3/28/2018 2:45:00 PM.000	804.5	1.27	1.22	0.85	0.29526	11	3.84242
3/28/2018 2:50:00 PM.000	780.2	0.96	0.86	1.07	0.33103	11.0025	3.60966
3/28/2018 2:55:00 PM.000	702.7	0.97	0.73	1.36	0.28609	11.0075	2.96199
3/28/2018 3:00:00 PM.000	561.3	0.97	0.45	1.53	0.17471	11.0075	2.08045
3/28/2018 3:05:00 PM.000	790	0.49	0.14	1.67	0.09986	11.0175	1.4476
3/28/2018 3:10:00 PM.000	752.2	-0.02	0.1	1.94	0.01501	11.0175	0.0341684
3/28/2018 3:15:00 PM.000	753.6	-0.03	0.19	1.83	0.01042	11.02	0.0164024
3/28/2018 3:20:00 PM.000	755.9	-0.03	0.39	1.48	0.0207	11.025	0.0330225
3/28/2018 3:25:00 PM.000	801.9	-0.03	0.45	1.23	0.07523	11.025	0.121173
3/28/2018 3:30:00 PM.000	830.3	-0.03	0.63	1.1	0.08225	11.025	0.132521
3/28/2018 3:35:00 PM.000	797.4	-0.03	0.88	0.71	0.08956	11.025	0.144338
3/28/2018 3:40:00 PM.000	747.7	0	1.05	0.56	0.17754	11.025	0.286561
3/28/2018 3:45:00 PM.000	719.6	0.06	1.21	0.44	0.22499	11.0225	0.771976
3/28/2018 3:50:00 PM.000	730.7	0.06	1.31	0.46	0.21079	11.0225	1.32589
3/28/2018 3:55:00 PM.000	665.2	0.32	0.92	0.4	0.25472	11.0225	2.01159
3/28/2018 4:00:00 PM.000	702.3	0.59	0.85	0.54	0.22125	11.02	2.39786
3/28/2018 4:05:00 PM.000	723	0.76	0.75	0.58	0.06408	11.0225	0.693484
3/28/2018 4:10:00 PM.000	771.5	0.73	0.45	0.6	0.00068	11.02	0.00713786
3/28/2018 4:15:00 PM.000	815.2	0.06	0.19	0.77	0.00043	11.02	0.00350918
3/28/2018 4:20:00 PM.000	913.8	-0.03	0.28	0.81	0.00178	11.02	0.00243713
3/28/2018 4:25:00 PM.000	940.2	-0.03	0.56	0.58	0.00577	11.025	0.0088875
3/28/2018 4:30:00 PM.000	926.1	-0.03	0.71	0.53	0.01121	11.0225	0.0176804
3/28/2018 4:35:00 PM.000	913.5	-0.03	0.89	0.53	0.04112	11.02	0.0660245
3/28/2018 4:40:00 PM.000	904	-0.03	1.23	0.33	0.06093	11.0175	0.0980386
3/28/2018 4:45:00 PM.000	779.3	0.42	1.53	0.25	0.08159	11.0175	0.163099
3/28/2018 4:50:00 PM.000	804.8	1.54	1.54	0.54	0.15902	11.0175	1.72321
3/28/2018 4:55:00 PM.000	802.9	1	1.28	0.57	0.17643	11.0175	1.38203
3/28/2018 5:00:00 PM.000	813.3	0.27	0.88	0.61	0.19293	11.0175	1.24904
3/28/2018 5:05:00 PM.000	837.8	0.27	0.85	0.82	0.16914	11.015	0.983446
3/28/2018 5:10:00 PM.000	917.9	0.58	0.77	0.91	0.00712	11.015	0.0593221
3/28/2018 5:15:00 PM.000	893.8	0.53	0.42	0.98	0	11.0125	0
3/28/2018 5:20:00 PM.000	888.1	-0.01	0.29	1.12	0	11.0125	0
3/28/2018 5:25:00 PM.000	922.2	-0.03	0.41	1.12	0.00033	11.01	9.32631e-05
3/28/2018 5:30:00 PM.000	908.9	-0.03	0.72	0.88	0.00613	11.01	0.00946589
3/28/2018 5:35:00 PM.000	976.8	-0.03	0.89	0.64	0.02412	11.0075	0.0385349
3/28/2018 5:40:00 PM.000	955.4	-0.03	1.07	0.72	0.02896	11.0075	0.0463557
3/28/2018 5:45:00 PM.000	948.9	-0.03	1.53	0.56	0.04753	11.0075	0.0763625
3/28/2018 5:50:00 PM.000	979.4	0.13	1.83	0.48	0.07514	11.0025	0.245493
3/28/2018 5:55:00 PM.000	1042.9	0.15	1.89	0.38	0.1574	11.0025	1.36721
3/28/2018 6:00:00 PM.000	1008.4	0.3	2.09	0.27	0.20276	10.9975	1.97475
3/28/2018 6:05:00 PM.000	987	0.85	1.77	0.16	0.23698	10.995	3.16625
3/28/2018 6:10:00 PM.000	990.4	0.9	1.31	0.19	0.25666	10.995	3.26522
3/28/2018 6:15:00 PM.000	980.8	1.11	1.19	0.52	0.08994	10.99	1.09074
3/28/2018 6:20:00 PM.000	930.1	1.13	0.97	0.78	0.00063	10.985	0.00781569
3/28/2018 6:25:00 PM.000	972.5	0.39	0.57	1.04	0	10.9825	0
3/28/2018 6:30:00 PM.000	949	-0.02	0.47	1.22	0	10.9825	0
3/28/2018 6:35:00 PM.000	961.1	-0.03	0.73	1.01	0.00278	10.9775	0.00404884
3/28/2018 6:40:00 PM.000	978.6	-0.03	1.11	0.7	0.00461	10.9775	0.00700379
3/28/2018 6:45:00 PM.000	1007.9	-0.03	1.16	0.49	0.0248	10.9725	0.0396003
3/28/2018 6:50:00 PM.000	1064.4	-0.03	1.5	0.38	0.06668	10.9675	0.107204
3/28/2018 6:55:00 PM.000	1038	-0.03	2.06	0.27	0.09254	10.9675	0.148951
3/28/2018 7:00:00 PM.000	1026.7	0.08	2.23	0.3	0.11861	10.9625	0.791071
3/28/2018 7:05:00 PM.000	1030.7	0.5	2.33	0.4	0.14109	10.9575	1.56994
3/28/2018 7:10:00 PM.000	933.2	0.41	2.52	0.45	0.13376	10.9575	1.12193
3/28/2018 7:15:00 PM.000	963.9	0.32	2.67	0.46	0.13609	10.95	1.80197
3/28/2018 7:20:00 PM.000	929.8	0.72	2.58	0.48	0.1876	10.945	2.55371
3/28/2018 7:25:00 PM.000	957.9	1.38	2.51	0.52	0.2156	10.945	3.09241
3/28/2018 7:30:00 PM.000	984.2	1.75	1.94	0.64	0.27628	10.9425	3.70572
3/28/2018 7:35:00 PM.000	1018.7	1.15	1.43	1.05	0.32577	10.935	3.59944
3/28/2018 7:40:00 PM.000	1043.8	0.83	1.25	1.44	0.21354	10.9325	2.34066
3/28/2018 7:45:00 PM.000	948.4	0.97	1.01	1.46	0.15936	10.93	2.19535
3/28/2018 7:50:00 PM.000	958.8	0.37	0.59	1.52	0.1506	10.925	1.32393
3/28/2018 7:55:00 PM.000	964.9	-0.03	0.54	1.68	0.05183	10.9225	0.0831419
3/28/2018 8:00:00 PM.000	917.7	-0.03	0.59	1.55	0.02418	10.9175	0.0385483
3/28/2018 8:05:00 PM.000	1021.1	-0.03	0.87	1.48	0.07811	10.915	0.125499
3/28/2018 8:10:00 PM.000	1012.2	-0.03	1.12	1.29	0.06418	10.91	0.103027
3/28/2018 8:15:00 PM.000	1004.3	-0.03	1.28	0.99	0.0819	10.9075	0.131586
3/28/2018 8:20:00 PM.000	1010.7	-0.03	1.63	0.82	0.12001	10.9	0.192987
3/28/2018 8:25:00 PM.000	1031.4	-0.02	2.02	0.57	0.12447	10.895	0.200152
3/28/2018 8:30:00 PM.000	1043.2	0.49	2.22	0.41	0.18489	10.895	1.39592
3/28/2018 8:35:00 PM.000	1038.3	1.13	2.23	0.29	0.26465	10.89	3.26549
3/28/2018 8:40:00 PM.000	866.7	1.38	1.94	0.32	0.30048	10.8825	3.38002
3/28/2018 8:45:00 PM.000	844.3	1.22	1.38	0.58	0.3415	10.8825	3.80075
3/28/2018 8:50:00 PM.000	853.7	1.15	1.15	0.8	0.29816	10.8775	3.03861
3/28/2018 8:55:00 PM.000	834.4	0.48	1.02	1.11	0.05164	10.8725	0.290413
3/28/2018 9:00:00 PM.000	785.3	0.04	0.67	1.19	0.00031	10.8675	0.00142206
3/28/2018 9:05:00 PM.000	808.5	-0.03	0.63	1.29	2e-05	10.8625	-0.000408184
3/28/2018 9:10:00 PM.000	840.8	-0.03	0.81	1.1	0.00057	10.8625	0.000477496
3/28/2018 9:15:00 PM.000	871.1	-0.03	1.09	0.96	0.00763	10.8575	0.0118449
3/28/2018 9:20:00 PM.000	886.5	-0.03	1.21	0.74	0.02675	10.855	0.0426282
3/28/2018 9:25:00 PM.000	896.6	-0.03	1.44	0.53	0.0401	10.8475	0.0641107
3/28/2018 9:30:00 PM.000	971.8	0	1.88	0.39	0.06402	10.8425	0.102604
3/28/2018 9:35:00 PM.000	1014.9	0.36	2.02	0.38	0.07157	10.84	0.378807
3/28/2018 9:40:00 PM.000	1250.5	0.54	2.07	0.34	0.08873	10.8375	0.8734
3/28/2018 9:45:00 PM.000	1199.2	0.79	2.19	0.27	0.1124	10.835	1.24277
3/28/2018 9:50:00 PM.000	1047.8	0.83	2.35	0.41	0.15409	10.8325	1.81384
3/28/2018 9:55:00 PM.000	1081.7	0.94	2.26	0.48	0.23124	10.83	2.71164
3/28/2018 10:00:00 PM.000	1020	1.22	1.82	0.58	0.24957	10.8275	3.13964
3/28/2018 10:05:00 PM.000	964.9	1.46	1.28	0.88	0.27636	10.825	3.99774
3/28/2018 10:10:00 PM.000	986.3	1.61	1.12	1.12	0.26119	10.8225	2.53095
3/28/2018 10:15:00 PM.000	981.3	0.35	0.86	1.34	0.1193	10.8175	0.758714
3/28/2018 10:20:00 PM.000	997.1	0	0.52	1.54	0.05415	10.815	0.175311
3/28/2018 10:25:00 PM.000	1142.3	-0.03	0.57	1.6	0.03832	10.8075	0.0611868
3/28/2018 10:30:00 PM.000	1164	-0.03	0.73	1.39	0.00437	10.805	0.006587
3/28/2018 10:35:00 PM.000	1144.6	-0.03	1.14	1.09	0.01524	10.805	0.0240674
3/28/2018 10:40:00 PM.000	1104.2	-0.03	1.36	0.88	0.05441	10.7975	0.0870424
3/28/2018 10:45:00 PM.000	1017.3	-0.03	1.61	0.72	0.05832	10.7925	0.0933179
3/28/2018 10:50:00 PM.000	1030.8	0	2.08	0.46	0.07111	10.79	0.113873
3/28/2018 10:55:00 PM.000	1027.6	0.54	2.28	0.26	0.10571	10.79	0.664587
3/28/2018 11:00:00 PM.000	1039.7	0.93	2.26	0.32	0.16535	10.7825	1.91303
3/28/2018 11:05:00 PM.000	1000.3	1.09	2.31	0.35	0.18955	10.78	1.85305
3/28/2018 11:10:00 PM.000	991.1	1.83	1.76	0.51	0.23656	10.7775	3.44145
3/28/2018 11:15:00 PM.000	970.5	1.23	1.23	0.99	0.2574	10.775	3.06896
3/28/2018 11:20:00 PM.000	980.5	0.26	1.18	1.14	0.11181	10.77	0.499079
3/28/2018 11:25:00 PM.000	974.1	0.34	1.02	1.13	0.01363	10.765	0.07172
3/28/2018 11:30:00 PM.000	1018.6	0	0.69	1.17	0	10.7625	0
3/28/2018 11:35:00 PM.000	1036.1	-0.03	0.75	1.14	0.00038	10.7575	0.000169737
3/28/2018 11:40:00 PM.000	994	-0.03	1.19	1	0.00523	10.7525	0.00795939
3/28/2018 11:45:00 PM.000	988.2	-0.03	1.46	0.79	0.01246	10.7475	0.0195693
3/28/2018 11:50:00 PM.000	988.6	-0.03	1.55	0.53	0.02734	10.7475	0.0434657
3/28/2018 11:55:00 PM.000	894.7	-0.03	1.99	0.47	0.0499	10.7425	0.0796863
3/29/2018 12:00:00 AM.000	894.6	0.01	2.45	0.32	0.07213	10.735	0.0828364
3/29/2018 12:05:00 AM.000	881.3	0.45	2.42	0.26	0.10626	10.7325	1.0373
3/29/2018 12:10:00 AM.000	867.3	0.94	2.49	0.2	0.1731	10.73	1.89178
3/29/2018 12:15:00 AM.000	854.4	1.22	2.4	0.21	0.18604	10.7225	1.90539
3/29/2018 12:20:00 AM.000	851.9	1.08	1.79	0.38	0.22559	10.7225	2.28159
3/29/2018 12:25:00 AM.000	858.2	0.72	1.51	0.66	0.21229	10.7175	1.80527
3/29/2018 12:30:00 AM.000	899.4	1.13	1.49	0.87	0.04125	10.7175	0.453068
3/29/2018 12:35:00 AM.000	885.8	0.92	1.04	0.91	5e-05	10.7125	0.000488281
3/29/2018 12:40:00 AM.000	900.9	-0.01	0.76	1.28	0	10.71	0
3/29/2018 12:45:00 AM.000	908.7	-0.03	0.88	1.29	0.00087	10.7025	0.000954869
3/29/2018 12:50:00 AM.000	891.5	-0.03	1.38	0.97	0.00615	10.7	0.0094246
3/29/2018 12:55:00 AM.000	876.4	-0.03	1.44	0.65	0.01625	10.7	0.0256263
3/29/2018 1:00:00 AM.000	868.4	-0.03	1.58	0.53	0.03242	10.695	0.051559
3/29/2018 1:05:00 AM.000	850.2	-0.03	2.11	0.35	0.0483	10.69	0.0770204
3/29/2018 1:10:00 AM.000	865.4	0.06	2.34	0.3	0.07517	10.685	0.288811
3/29/2018 1:15:00 AM.000	868.7	0.56	2.25	0.24	0.10673	10.685	1.24523
3/29/2018 1:20:00 AM.000	851.4	0.85	2.47	0.31	0.10371	10.68	1.18979
3/29/2018 1:25:00 AM.000	871.3	1.07	2.57	0.3	0.11958	10.675	1.28899
3/29/2018 1:30:00 AM.000	848.2	1.12	2.35	0.33	0.27611	10.675	2.84983
3/29/2018 1:35:00 AM.000	846.8	1.1	2.02	0.59	1.24267	10.6675	11.9495
3/29/2018 1:40:00 AM.000	866.7	1.05	1.58	0.94	0.29063	10.665	3.6097
3/29/2018 1:45:00 AM.000	874	1.86	1.37	1.09	0.28245	10.66	3.83874
3/29/2018 1:50:00 AM.000	945.1	1.22	1.01	1.41	0.15379	10.6575	1.55536
3/29/2018 1:55:00 AM.000	910.4	0.23	0.7	1.6	0.08653	10.6525	0.404244
3/29/2018 2:00:00 AM.000	952.3	-0.03	0.64	1.82	0.02238	10.65	0.00467281
3/29/2018 2:05:00 AM.000	934.3	-0.03	0.65	1.62	0.00447	10.645	0.00672017
3/29/2018 2:10:00 AM.000	880.6	-0.03	0.59	1.36	0.00424	10.64	0.00635088
3/29/2018 2:15:00 AM.000	880.1	-0.03	0.55	1.2	0.00316	10.635	0.00462026
3/29/2018 2:20:00 AM.000	892.9	-0.03	0.63	1.16	0.00359	10.63	0.00530828
3/29/2018 2:25:00 AM.000	876.6	-0.03	0.94	0.95	0.01123	10.6275	0.0175425
3/29/2018 2:30:00 AM.000	851.8	-0.03	1.19	0.8	0.00963	10.6225	0.0149784
3/29/2018 2:35:00 AM.000	845.1	-0.03	1.38	0.62	0.02313	10.615	0.0365878
3/29/2018 2:40:00 AM.000	847.5	-0.03	1.72	0.5	0.0546	10.615	0.0869682
3/29/2018 2:45:00 AM.000	830.4	0.01	2.05	0.3	0.0679	10.61	0.0965806
3/29/2018 2:50:00 AM.000	833.3	0.22	2.21	0.25	0.08885	10.6075	0.736821
3/29/2018 2:55:00 AM.000	842.4	0.48	2.3	0.15	0.104	10.6025	0.919645
3/29/2018 3:00:00 AM.000	856	0.88	2.37	0.18	0.10239	10.6	1.03447
3/29/2018 3:05:00 AM.000	862.2	1.08	2.35	0.29	0.13773	10.595	1.62478
3/29/2018 3:10:00 AM.000	901.4	1.27	2.19	0.46	0.21392	10.59	3.00654
3/29/2018 3:15:00 AM.000	845.8	1.57	1.88	0.75	0.24959	10.585	2.90679
3/29/2018 3:20:00 AM.000	871.6	1.33	1.35	1.03	0.30117	10.585	3.39813
3/29/2018 3:25:00 AM.000	793.1	1.54	1.1	1.23	0.32925	10.5775	4.58059
3/29/2018 3:30:00 AM.000	759.1	1.2	0.87	1.44	0.27287	10.575	3.39144
3/29/2018 3:35:00 AM.000	750.1	0.33	0.54	1.82	0.24403	10.57	1.41774
3/29/2018 3:40:00 AM.000	782	-0.03	0.44	1.92	0.13541	10.5625	0.0806504
3/29/2018 3:45:00 AM.000	815.3	-0.03	0.46	1.81	0.00244	10.5575	0.00345969
3/29/2018 3:50:00 AM.000	831.3	-0.03	0.43	1.52	0.00113	10.5525	0.00136514
3/29/2018 3:55:00 AM.000	1024.5	-0.03	0.35	1.37	0.00055	10.5475	0.00043787
3/29/2018 4:00:00 AM.000	1047.1	-0.03	0.41	1.22	0.00097	10.5425	0.00110898
3/29/2018 4:05:00 AM.000	1024.9	-0.03	0.75	1.09	0.00733	10.5425	0.0112732
3/29/2018 4:10:00 AM.000	987	-0.03	0.98	0.85	0.00746	10.5325	0.0114781
3/29/2018 4:15:00 AM.000	1001.5	-0.03	1.08	0.6	0.01826	10.53	0.0287323
3/29/2018 4:20:00 AM.000	1067.7	-0.03	1.54	0.3	0.03249	10.5275	0.0514642
3/29/2018 4:25:00 AM.000	981.1	0.21	1.94	0.17	0.04046	10.5225	0.0630184
3/29/2018 4:30:00 AM.000	971.2	0.57	2	0.16	0.05737	10.52	0.583092
3/29/2018 4:35:00 AM.000	927.7	0.72	2.11	0.28	0.0865	10.515	0.935397
3/29/2018 4:40:00 AM.000	745.8	0.8	2.26	0.37	0.10377	10.5125	1.12831
3/29/2018 4:45:00 AM.000	717.3	0.98	2.27	0.49	0.15566	10.51	1.70087
3/29/2018 4:50:00 AM.000	708.1	1.21	2.07	0.56	0.21854	10.505	2.7248
3/29/2018 4:55:00 AM.000	707.7	2.15	1.64	0.88	0.25372	10.5025	3.75767
3/29/2018 5:00:00 AM.000	725.9	1.51	1.21	1.16	0.30824	10.4975	3.16873
3/29/2018 5:05:00 AM.000	728.4	0.33	1.02	1.43	0.30598	10.495	1.61752
3/29/2018 5:10:00 AM.000	751.1	0.32	0.84	1.45	0.2677	10.49	0.983193
3/29/2018 5:15:00 AM.000	808.4	0.05	0.6	1.53	0.24552	10.4875	0.974321
3/29/2018 5:20:00 AM.000	865	-0.03	0.63	1.56	0.16967	10.485	0.270348
3/29/2018 5:25:00 AM.000	893.5	-0.03	0.77	1.43	0.18125	10.4825	0.288812
3/29/2018 5:30:00 AM.000	938.4	-0.03	1.06	1.19	0.16093	10.475	0.256338
3/29/2018 5:35:00 AM.000	931.2	-0.03	1.19	0.89	0.1944	10.4725	0.309724
3/29/2018 5:40:00 AM.000	931.5	-0.03	1.39	0.79	0.18086	10.47	0.288104
3/29/2018 5:45:00 AM.000	902.2	0.09	1.82	0.71	0.18126	10.4675	0.288725
3/29/2018 5:50:00 AM.000	870.1	0.82	1.95	0.48	0.2028	10.4625	1.46305
3/29/2018 5:55:00 AM.000	872.1	0.98	1.86	0.34	0.2188	10.46	2.44243
3/29/2018 6:00:00 AM.000	844.5	1.11	1.94	0.53	0.23471	10.455	2.95471
3/29/2018 6:05:00 AM.000	819.4	1.81	1.96	0.62	0.31142	10.4525	4.163
3/29/2018 6:10:00 AM.000	822.2	1.22	1.65	0.85	0.35291	10.45	2.90526
3/29/2018 6:15:00 AM.000	823	0.37	1.07	1.25	0.35021	10.445	1.60499
3/29/2018 6:20:00 AM.000	813.3	0.23	1.03	1.27	0.38449	10.44	1.1595
3/29/2018 6:25:00 AM.000	829.9	0.26	1.08	1.26	0.31648	10.4375	1.67377
3/29/2018 6:30:00 AM.000	886.9	0.56	0.7	1.33	0.23546	10.4325	1.81202
3/29/2018 6:35:00 AM.000	871.2	0.11	0.51	1.58	0.21124	10.4275	1.81597
3/29/2018 6:40:00 AM.000	875.8	-0.03	0.66	1.63	0.11362	10.425	0.180635
3/29/2018 6:45:00 AM.000	722.7	-0.03	0.91	1.34	0.14713	10.4225	0.234026
3/29/2018 6:50:00 AM.000	518	-0.03	1.12	1.01	0.1361	10.42	0.216436
3/29/2018 6:55:00 AM.000	511.8	-0.03	1.24	0.85	0.1686	10.4175	0.268209
3/29/2018 7:00:00 AM.000	501.8	-0.03	1.43	0.68	0.19091	10.41	0.303704
3/29/2018 7:05:00 AM.000	484.4	0.36	1.64	0.47	0.18954	10.41	0.341641
3/29/2018 7:10:00 AM.000	490.8	0.97	1.56	0.22	0.25013	10.405	1.93528
3/29/2018 7:15:00 AM.000	492.5	0.9	1.39	0.35	0.29079	10.4025	2.17047
3/29/2018 7:20:00 AM.000	489.7	1.22	1.06	0.56	0.32647	10.4	3.34242
3/29/2018 7:25:00 AM.000	484	1.66	0.78	0.86	0.39201	10.4	4.48308
3/29/2018 7:30:00 AM.000	503.9	0.87	0.56	1.06	0.38803	10.3975	2.23684
3/29/2018 7:35:00 AM.000	501.6	0.34	0.35	1.3	0.36704	10.3925	1.57382
3/29/2018 7:40:00 AM.000	492.5	-0.02	0.22	1.47	0.36507	10.3875	0.411329
3/29/2018 7:45:00 AM.000	496.9	-0.03	0.22	1.4	0.29235	10.385	0.465036
3/29/2018 7:50:00 AM.000	502.3	-0.03	0.36	1.21	0.27829	10.38	0.442597
3/29/2018 7:55:00 AM.000	528.4	-0.03	0.51	1.06	0.24004	10.38	0.381703
3/29/2018 8:00:00 AM.000	536.6	-0.03	0.56	1.06	0.25114	10.38	0.399374
3/29/2018 8:05:00 AM.000	503.4	-0.03	0.7	0.76	0.28144	10.375	0.447559
3/29/2018 8:10:00 AM.000	505.1	0.08	0.91	0.75	0.25503	10.3725	0.405495
3/29/2018 8:15:00 AM.000	514.1	1.3	0.89	0.45	0.27442	10.37	1.75551
3/29/2018 8:20:00 AM.000	505.7	1.24	0.76	0.38	0.31049	10.3675	2.36786
3/29/2018 8:25:00 AM.000	506	0.36	0.69	0.55	0.34526	10.3675	1.68486
3/29/2018 8:30:00 AM.000	505.4	0.29	0.41	0.63	0.39328	10.3625	1.22619
3/29/2018 8:35:00 AM.000	527.9	0.15	0.32	0.73	0.41933	10.36	1.3143
3/29/2018 8:40:00 AM.000	528.8	0.29	0.31	0.74	0.37825	10.36	2.08205
3/29/2018 8:45:00 AM.000	518.7	0.44	0.12	0.83	0.37531	10.355	3.15101
3/29/2018 8:50:00 AM.000	513	0	0.09	0.98	0.34184	10.355	1.41785
3/29/2018 8:55:00 AM.000	525.7	-0.03	0.09	0.81	0.27935	10.3525	0.443995
3/29/2018 9:00:00 AM.000	529.6	-0.03	0.22	0.67	0.2744	10.35	0.436094
3/29/2018 9:05:00 AM.000	527.9	-0.03	0.29	0.54	0.30934	10.3475	0.49165
3/29/2018 9:10:00 AM.000	529.1	-0.03	0.38	0.44	0.31913	10.3475	0.507223
3/29/2018 9:15:00 AM.000	523	-0.02	0.56	0.29	0.33476	10.345	0.532056
3/29/2018 9:20:00 AM.000	523.8	0.22	0.72	0.42	0.35288	10.3425	1.34932
3/29/2018 9:25:00 AM.000	537.8	0.99	0.72	0.37	0.34872	10.3425	3.76359
3/29/2018 9:30:00 AM.000	542.6	1.61	0.65	0.28	0.32591	10.3425	3.5069
3/29/2018 9:35:00 AM.000	528.5	0.64	0.61	0.58	0.31684	10.3425	1.54098
3/29/2018 9:40:00 AM.000	526.9	0.2	0.63	0.66	0.31915	10.34	1.15798
3/29/2018 9:45:00 AM.000	510	0.49	0.54	0.78	0.29583	10.34	1.45916
3/29/2018 9:50:00 AM.000	547.9	0.9	0.29	0.88	0.28594	10.3375	2.3778
3/29/2018 9:55:00 AM.000	996.1	1.37	0.13	1	0.31214	10.335	3.00292
3/29/2018 10:00:00 AM.000	1225.7	0.55	0.09	1.17	0.27348	10.335	1.60209
3/29/2018 10:05:00 AM.000	1186	0.31	0.08	1.35	0.22146	10.3325	0.826313
3/29/2018 10:10:00 AM.000	1176.2	-0.02	0.07	1.48	0.21642	10.33	0.284009
3/29/2018 10:15:00 AM.000	955.5	-0.03	0.07	1.42	0.18551	10.3275	0.294524
3/29/2018 10:20:00 AM.000	588.9	-0.03	0.1	1.2	0.18752	10.3275	0.297719
3/29/2018 10:25:00 AM.000	529.2	-0.03	0.25	0.96	0.18512	10.3225	0.293869
3/29/2018 10:30:00 AM.000	522.4	-0.03	0.22	0.83	0.21168	10.3225	0.336095
3/29/2018 10:35:00 AM.000	525	-0.03	0.43	0.61	0.21519	10.32	0.341655
3/29/2018 10:40:00 AM.000	521.7	0.02	0.77	0.39	0.2143	10.3175	0.209845
3/29/2018 10:45:00 AM.000	514.4	0.48	0.73	0.32	0.27461	10.3175	2.03188
3/29/2018 10:50:00 AM.000	511.4	1.53	0.65	0.31	0.33157	10.315	3.41003
3/29/2018 10:55:00 AM.000	514.9	1.02	0.47	0.45	0.36031	10.315	2.6488
3/29/2018 11:00:00 AM.000	521.3	0.38	0.27	0.62	0.41033	10.315	2.8365
3/29/2018 11:05:00 AM.000	513.8	0.51	0.11	0.66	0.39498	10.315	1.75186
3/29/2018 11:10:00 AM.000	532.7	0.39	0.09	0.73	0.3298	10.315	1.62562
3/29/2018 11:15:00 AM.000	668.8	0.01	0.08	1.03	0.14747	10.315	0.353162
3/29/2018 11:20:00 AM.000	1090.5	-0.03	0.08	1.06	0.00669	10.3175	0.0101929
3/29/2018 11:25:00 AM.000	1208.9	-0.03	0.11	0.86	0.00371	10.3175	0.00545576
3/29/2018 11:30:00 AM.000	1235.5	-0.03	0.36	0.66	0.0068	10.3175	0.0103678
3/29/2018 11:35:00 AM.000	1196.8	-0.03	0.51	0.61	0.02269	10.3175	0.0356273
3/29/2018 11:40:00 AM.000	1180.6	-0.03	0.74	0.54	0.03586	10.315	0.0565595
3/29/2018 11:45:00 AM.000	1150.3	-0.02	1.28	0.34	0.02958	10.3175	0.0465799
3/29/2018 11:50:00 AM.000	991.4	0.07	1.59	0.21	0.06125	10.3175	0.309978
3/29/2018 11:55:00 AM.000	610	0.53	1.74	0.26	0.13387	10.32	1.18046
3/29/2018 12:00:00 PM.000	521.2	1.12	1.78	0.29	0.16212	10.32	1.44788
3/29/2018 12:05:00 PM.000	481.4	0.87	1.3	0.42	0.19676	10.32	1.62567
3/29/2018 12:10:00 PM.000	489.4	0.69	1.11	0.62	0.18664	10.32	1.53197
3/29/2018 12:15:00 PM.000	489.6	0.77	1.07	0.79	0.01192	10.3175	0.101957
3/29/2018 12:20:00 PM.000	488.3	0.66	0.79	0.86	0	10.315	0
3/29/2018 12:25:00 PM.000	496.2	0.01	0.54	1	0	10.315	0
3/29/2018 12:30:00 PM.000	720.4	-0.03	0.63	1.02	0.00031	10.315	5.0925e-05
3/29/2018 12:35:00 PM.000	1092.7	-0.03	0.87	0.8	0.00429	10.3125	0.00637693
3/29/2018 12:40:00 PM.000	1187.2	-0.03	1.01	0.52	0.01011	10.31	0.0156266
3/29/2018 12:45:00 PM.000	1171.7	-0.03	1.3	0.55	0.03432	10.31	0.0541051
3/29/2018 12:50:00 PM.000	1165.5	-0.03	1.72	0.52	0.05176	10.31	0.0818236
3/29/2018 12:55:00 PM.000	1187.7	0.59	2	0.46	0.06531	10.3075	0.111171
3/29/2018 1:00:00 PM.000	1197.8	1.26	2.06	0.48	0.13104	10.3025	1.25814
3/29/2018 1:05:00 PM.000	1176.1	1.26	1.95	0.53	0.17114	10.3	1.64755
3/29/2018 1:10:00 PM.000	1164	0.51	1.4	0.53	0.20006	10.295	1.24491
3/29/2018 1:15:00 PM.000	1197.4	0.52	1.32	0.68	0.21843	10.29	1.26892
3/29/2018 1:20:00 PM.000	1170	0.54	1.32	0.81	0.09688	10.285	0.718856
3/29/2018 1:25:00 PM.000	836	0.51	0.92	0.95	0.01104	10.28	0.114947
3/29/2018 1:30:00 PM.000	568.3	0.02	0.72	1.06	0	10.275	0
3/29/2018 1:35:00 PM.000	531.5	-0.03	0.86	1.05	0	10.2725	-0.00044195
3/29/2018 1:40:00 PM.000	522.2	-0.03	1.15	0.96	0	10.2675	-0.000441963
3/29/2018 1:45:00 PM.000	548.6	-0.03	1.19	0.78	0	10.265	-0.00044197
3/29/2018 1:50:00 PM.000	980.7	-0.03	1.34	0.62	0	10.2575	-0.00044199
3/29/2018 1:55:00 PM.000	1202.2	-0.01	1.69	0.34	0	10.2575	-0.00044199
3/29/2018 2:00:00 PM.000	1262.5	0.83	2	0.33	0	10.25	0
3/29/2018 2:05:00 PM.000	1236.4	1.37	1.93	0.52	0	10.2475	0
3/29/2018 2:10:00 PM.000	1222.8	1.29	1.97	0.47	0.01858	10.2475	0.177116
3/29/2018 2:15:00 PM.000	1224.9	0.99	2.01	0.63	0.07667	10.24	0.519062
3/29/2018 2:20:00 PM.000	1213.5	0.52	2.15	0.84	0.15093	10.24	0.922531
3/29/2018 2:25:00 PM.000	1243.6	0.76	1.62	1	0.19128	10.235	1.20718
3/29/2018 2:30:00 PM.000	1249.8	0.83	1.23	1.16	0.24148	10.2325	1.88385
3/29/2018 2:35:00 PM.000	1223.9	0.83	1.25	1.43	0.27178	10.2325	2.06595
3/29/2018 2:40:00 PM.000	1217.7	0.7	1.05	1.62	0.2418	10.2325	1.72051
3/29/2018 2:45:00 PM.000	1197	0.23	0.62	1.75	0.21635	10.23	1.31377
3/29/2018 2:50:00 PM.000	1165.8	-0.03	0.65	1.78	0.19669	10.2275	0.10293
3/29/2018 2:55:00 PM.000	1163.3	-0.03	0.95	1.68	0.20335	10.2275	0.322123
3/29/2018 3:00:00 PM.000	1187.6	-0.03	1.36	1.47	0.1945	10.2275	0.308085
3/29/2018 3:05:00 PM.000	1162.7	-0.03	1.51	1.31	0.22318	10.225	0.353558
3/29/2018 3:10:00 PM.000	1176.4	-0.03	1.95	1.08	0.23292	10.2225	0.368985
3/29/2018 3:15:00 PM.000	1203.5	-0.03	2.39	0.9	0.23187	10.22	0.367298
3/29/2018 3:20:00 PM.000	1210.6	0.05	2.7	0.6	0.24735	10.2225	0.190418
3/29/2018 3:25:00 PM.000	1202.3	0.09	3.01	0.44	0.25573	10.2175	1.60557
3/29/2018 3:30:00 PM.000	1225	0.13	3.4	0.29	0.25689	10.22	1.76758
3/29/2018 3:35:00 PM.000	1220.8	0.4	3.59	0.34	0.27007	10.2175	2.51494
3/29/2018 3:40:00 PM.000	1243	0.97	3.75	0.49	0.31342	10.2175	3.19715
3/29/2018 3:45:00 PM.000	1198.8	1.21	3.75	0.57	0.35894	10.2175	3.77572
3/29/2018 3:50:00 PM.000	1188	1.45	3.03	0.73	0.42214	10.22	4.5966
3/29/2018 3:55:00 PM.000	1071.5	1.14	2.67	0.92	0.48848	10.22	4.76317
3/29/2018 4:00:00 PM.000	1027.8	1.04	2.64	1.21	0.51469	10.2175	6.12511
3/29/2018 4:05:00 PM.000	1077.6	1.63	2.29	1.43	0.54238	10.2175	7.40555
3/29/2018 4:10:00 PM.000	1113.6	1.56	1.66	1.73	0.55655	10.2175	5.23102
3/29/2018 4:15:00 PM.000	1149.8	0.74	1.51	2.03	0.4931	10.2175	4.46208
3/29/2018 4:20:00 PM.000	1184.2	0.21	1.42	2.28	0.4536	10.2175	3.55412
3/29/2018 4:25:00 PM.000	1156.9	-0.03	1.21	2.26	0.48181	10.2125	0.763561
3/29/2018 4:30:00 PM.000	1150.7	-0.03	1.82	2.08	0.46995	10.2125	0.744754
3/29/2018 4:35:00 PM.000	1063.4	-0.03	2.33	1.82	0.43177	10.2125	0.684213
3/29/2018 4:40:00 PM.000	1101.6	-0.03	2.31	1.68	0.44895	10.215	0.711497
3/29/2018 4:45:00 PM.000	1145.2	-0.03	2.76	1.55	0.47768	10.2125	0.757012
3/29/2018 4:50:00 PM.000	1192.9	-0.03	3.46	1.38	0.47434	10.215	0.75176
3/29/2018 4:55:00 PM.000	1146.9	0.06	3.64	1.14	0.49431	10.215	0.783428
3/29/2018 5:00:00 PM.000	1030.8	1.01	3.86	0.97	0.50734	10.2125	4.50323
3/29/2018 5:05:00 PM.000	963	1.3	4.14	0.91	0.50687	10.2125	5.79449
3/29/2018 5:10:00 PM.000	928.4	1.49	4.03	1.09	0.576	10.2125	5.3161
3/29/2018 5:15:00 PM.000	947.1	0.99	3.73	1.21	0.64247	10.2125	5.12383
3/29/2018 5:20:00 PM.000	934.3	0.89	3.27	1.45	0.68413	10.2125	5.28978
3/29/2018 5:25:00 PM.000	907	0.8	3.1	1.73	0.75084	10.2125	4.79216
3/29/2018 5:30:00 PM.000	917.9	0.83	2.87	1.96	0.79324	10.21	5.43903
3/29/2018 5:35:00 PM.000	921	0.68	2.53	1.97	0.81897	10.21	5.48121
3/29/2018 5:40:00 PM.000	945.8	0.87	2.22	2.24	0.84229	10.205	7.05775
3/29/2018 5:45:00 PM.000	971	1.11	2.02	2.48	0.79161	10.2075	7.43389
3/29/2018 5:50:00 PM.000	1003.7	0.97	1.75	2.58	0.74676	10.2075	7.06249
3/29/2018 5:55:00 PM.000	1024.7	1.22	1.38	2.8	0.72589	10.205	7.34674
3/29/2018 6:00:00 PM.000	1019.9	1.46	1.12	3.04	0.6725	10.2025	7.10747
3/29/2018 6:05:00 PM.000	1011.3	0.29	0.89	3.28	0.62796	10.2025	3.72298
3/29/2018 6:10:00 PM.000	979.6	-0.03	0.85	3.44	0.6445	10.2	1.02123
3/29/2018 6:15:00 PM.000	948	-0.03	1.23	3.25	0.63824	10.2	1.01131
3/29/2018 6:20:00 PM.000	940	-0.03	1.48	3	0.63524	10.2	1.00656
3/29/2018 6:25:00 PM.000	929	-0.03	1.6	2.83	0.66275	10.1975	1.0501
3/29/2018 6:30:00 PM.000	926.8	-0.03	1.98	2.6	0.68558	10.1975	1.08629
3/29/2018 6:35:00 PM.000	882.8	-0.03	2.39	2.28	0.67776	10.1975	1.0739
3/29/2018 6:40:00 PM.000	892.5	-0.03	2.54	2.07	0.68014	10.1975	1.07767
3/29/2018 6:45:00 PM.000	946	-0.03	2.88	1.97	0.69573	10.1975	1.10238
3/29/2018 6:50:00 PM.000	897.5	-0.03	3.35	1.73	0.69371	10.195	1.09911
3/29/2018 6:55:00 PM.000	881.9	-0.03	3.53	1.47	0.71376	10.1925	1.13083
3/29/2018 7:00:00 PM.000	906.9	-0.03	3.71	1.54	0.81654	10.195	1.2938
3/29/2018 7:05:00 PM.000	964	-0.03	4.07	1.6	0.82925	10.195	1.31395
3/29/2018 7:10:00 PM.000	979.6	-0.03	4.08	1.28	0.87229	10.1925	1.38209
3/29/2018 7:15:00 PM.000	997.5	-0.03	3.95	1.38	0.89493	10.19	1.41789
3/29/2018 7:20:00 PM.000	1001.2	-0.03	3.64	1.1	0.90282	10.185	1.43022
3/29/2018 7:25:00 PM.000	994.1	-0.03	3.65	1.06	0.92304	10.1775	1.462
3/29/2018 7:30:00 PM.000	993.7	-0.03	3.7	0.81	0.93052	10.17	1.47359
3/29/2018 7:35:00 PM.000	1066.4	-0.03	3.79	0.41	0.94659	10.1675	1.49896
3/29/2018 7:40:00 PM.000	1040.1	-0.03	3.85	0.42	0.86623	10.1675	1.37167
3/29/2018 7:45:00 PM.000	935.7	0.24	3.91	0.3	0.80148	10.1675	1.10836
3/29/2018 7:50:00 PM.000	982.6	0.91	3.69	0.47	0.80948	10.1575	6.2482
3/29/2018 7:55:00 PM.000	977.7	0.28	3.68	0.57	0.80911	10.1575	6.38222
3/29/2018 8:00:00 PM.000	1001.7	-0.03	4.06	0.48	0.70972	10.16	0.512716
3/29/2018 8:05:00 PM.000	996.5	-0.03	4.3	0.56	0.72184	10.155	1.14261
3/29/2018 8:10:00 PM.000	1003.9	-0.03	4.43	0.6	0.77079	10.1525	1.22006
3/29/2018 8:15:00 PM.000	972.9	-0.03	4.29	0.46	0.74408	10.1525	1.17776
3/29/2018 8:20:00 PM.000	999.5	-0.03	3.97	0.79	0.75729	10.145	1.19847
3/29/2018 8:25:00 PM.000	1046.8	-0.03	3.65	0.96	0.75865	10.14	1.20048
3/29/2018 8:30:00 PM.000	1086.1	-0.03	3.39	0.69	0.71044	10.1375	1.1241
3/29/2018 8:35:00 PM.000	1105.1	-0.03	3.2	0.67	0.68464	10.13	1.08306
3/29/2018 8:40:00 PM.000	1168	-0.03	3.29	0.38	0.70292	10.13	1.11199
3/29/2018 8:45:00 PM.000	1079.1	-0.03	3.36	0.77	0.70165	10.13	1.10998
3/29/2018 8:50:00 PM.000	1060.7	-0.03	3.32	0.77	0.70026	10.1275	1.10772
3/29/2018 8:55:00 PM.000	1087.4	-0.03	3.24	0.76	0.69014	10.1225	1.09157
3/29/2018 9:00:00 PM.000	1125.8	-0.03	3.23	0.59	0.6695	10.1175	1.05879
3/29/2018 9:05:00 PM.000	1041.2	-0.03	3.28	0.55	0.62695	10.1175	0.991471
3/29/2018 9:10:00 PM.000	1058.6	-0.03	3.31	0.71	0.64054	10.1125	1.01285
3/29/2018 9:15:00 PM.000	1042.8	-0.03	3.31	0.76	0.65037	10.11	1.02834
3/29/2018 9:20:00 PM.000	1021.8	-0.03	3.31	0.92	0.65143	10.1075	1.02996
3/29/2018 9:25:00 PM.000	1038.3	-0.03	3.34	0.83	0.65644	10.1025	1.03776
3/29/2018 9:30:00 PM.000	1065.2	-0.03	3.35	0.75	0.66001	10.0975	1.04328
3/29/2018 9:35:00 PM.000	1169.1	-0.03	3.34	0.89	0.64042	10.0975	1.0123
3/29/2018 9:40:00 PM.000	1158.5	-0.03	3.31	1.2	0.61686	10.09	0.974871
3/29/2018 9:45:00 PM.000	1130.4	-0.03	3.28	1.11	0.63259	10.0875	0.999682
3/29/2018 9:50:00 PM.000	1112.2	-0.03	3.24	0.98	0.65126	10.085	1.02914
3/29/2018 9:55:00 PM.000	1023.9	-0.03	3.21	0.92	0.64365	10.08	1.01699
3/29/2018 10:00:00 PM.000	996	-0.03	3.22	0.93	0.72038	10.0775	1.13821
3/29/2018 10:05:00 PM.000	945.2	-0.03	3.19	0.99	0.81712	10.0675	1.29081
3/29/2018 10:10:00 PM.000	953.2	-0.03	3.18	1.03	0.89689	10.05	1.41628
3/29/2018 10:15:00 PM.000	975.2	-0.03	3.16	1.07	0.97975	10.04	1.5468
3/29/2018 10:20:00 PM.000	1014.9	-0.03	3.13	1.11	1.02419	10.025	1.6164
3/29/2018 10:25:00 PM.000	1230	-0.03	3.08	1.2	0.99884	10.02	1.5762
3/29/2018 10:30:00 PM.000	1188.4	-0.03	3.04	1.39	0.99974	10.0075	1.57715
3/29/2018 10:35:00 PM.000	1195	-0.03	3	1.56	0.88852	9.9925	1.40115
3/29/2018 10:40:00 PM.000	1134.5	-0.03	2.97	1.64	0.86544	9.9825	1.36441
3/29/2018 10:45:00 PM.000	1059.4	-0.03	3.03	1.59	0.89142	9.98	1.4053
3/29/2018 10:50:00 PM.000	980.2	-0.03	5.76	1.45	0.89203	9.975	1.18717
3/29/2018 10:55:00 PM.000	777.8	0.08	8.78	0.83	1.02974	10.01	10.2848
3/29/2018 11:00:00 PM.000	746.8	0.58	7.96	0.46	1.25357	10.0275	12.2951
3/29/2018 11:05:00 PM.000	797.1	0.86	4.95	0.49	1.27967	10.035	14.8991
3/29/2018 11:10:00 PM.000	804.3	1.26	5.67	0.61	1.2403	10.0375	18.7785
3/29/2018 11:15:00 PM.000	831.7	1.88	7.14	0.6	1.14857	10.035	18.8146
3/29/2018 11:20:00 PM.000	832.5	2.63	5.88	0.65	1.15726	10.035	19.25
3/29/2018 11:25:00 PM.000	962.4	2.37	4.31	1.3	1.13116	10.0375	12.3694
3/29/2018 11:30:00 PM.000	912.2	1.1	5.29	1.71	1.10898	10.0375	14.7155
3/29/2018 11:35:00 PM.000	933.4	1.45	5.84	1.55	1.12053	10.0425	17.3185
3/29/2018 11:40:00 PM.000	951.7	1.89	4	1.79	1.16539	10.0375	17.1637
3/29/2018 11:45:00 PM.000	948.7	1.68	3.82	2.2	1.18089	10.0375	16.004
3/29/2018 11:50:00 PM.000	918.1	1.68	4.64	2.45	1.19213	10.035	16.8315
3/29/2018 11:55:00 PM.000	940.8	1.76	3.93	2.69	1.18125	10.0375	16.943
3/30/2018 12:00:00 AM.000	996.5	1.72	2.93	3.04	1.2038	10.04	16.3411
3/30/2018 12:05:00 AM.000	1026.7	1.64	3.28	3.33	1.20507	10.0375	15.2673
3/30/2018 12:10:00 AM.000	1086.6	1.68	3.45	3.4	1.20895	10.0375	14.5059
3/30/2018 12:15:00 AM.000	1086.1	1.64	2.53	3.56	1.18726	10.0325	13.8235
3/30/2018 12:20:00 AM.000	1108	1.5	2.39	3.96	1.17035	10.03	12.8792
3/30/2018 12:25:00 AM.000	1304.9	1.34	2.79	4.07	1.14369	10.03	11.9492
3/30/2018 12:30:00 AM.000	1496.4	1	2.44	4.04	1.13007	10.03	9.62169
3/30/2018 12:35:00 AM.000	1474.7	0.9	2.08	4.24	1.11244	10.03	9.17905
3/30/2018 12:40:00 AM.000	1477.3	1.05	2.47	4.31	1.10719	10.0275	11.2388
3/30/2018 12:45:00 AM.000	1440.1	1.1	2.57	4.41	1.10096	10.025	11.9131
3/30/2018 12:50:00 AM.000	797.2	1.11	2.19	4.54	1.09836	10.0225	11.8634
3/30/2018 12:55:00 AM.000	580.4	1.19	2.23	4.78	1.07265	10.0225	11.6304
3/30/2018 1:00:00 AM.000	601.4	1.3	2.23	4.81	1.08013	10.02	11.3733
3/30/2018 1:05:00 AM.000	583.2	1.13	1.82	4.88	1.0893	10.0175	10.1592
3/30/2018 1:10:00 AM.000	679.2	1.09	1.65	4.99	1.08008	10.02	6.36679
3/30/2018 1:15:00 AM.000	1130.4	0.73	1.63	5.06	1.06964	10.015	6.7655
3/30/2018 1:20:00 AM.000	1244.5	0.1	1.56	5.13	1.06088	10.005	0.592473
3/30/2018 1:25:00 AM.000	1581.5	-0.03	1.59	5.19	1.06051	9.9925	1.67245
3/30/2018 1:30:00 AM.000	1599	-0.03	1.97	5.15	1.14735	9.9875	1.80922
3/30/2018 1:35:00 AM.000	1417.1	-0.03	2.52	5.02	1.2452	9.9725	1.96286
3/30/2018 1:40:00 AM.000	1228	-0.03	2.51	4.6	1.29032	9.9625	2.03351
3/30/2018 1:45:00 AM.000	1147.8	-0.03	2.21	4.37	1.0591	9.965	1.66914
3/30/2018 1:50:00 AM.000	1145.7	-0.03	1.89	4.27	0.7899	9.9575	1.24454
3/30/2018 1:55:00 AM.000	1217	-0.03	1.75	4.19	0.57879	9.9525	0.911699
3/30/2018 2:00:00 AM.000	1225.7	-0.03	2.14	4.08	0.4479	9.9425	0.705256
3/30/2018 2:05:00 AM.000	1282.9	-0.03	2.29	3.91	0.34552	9.94	0.543916
3/30/2018 2:10:00 AM.000	1461.1	-0.03	2.36	3.81	0.30185	9.9275	0.474974
3/30/2018 2:15:00 AM.000	878.3	-0.03	2.8	3.69	0.2081	9.93	0.327336
3/30/2018 2:20:00 AM.000	972.2	0.38	2.88	3.69	0.20307	9.96	1.17613
3/30/2018 2:25:00 AM.000	936.5	0.97	1.85	3.53	0.63814	9.96	6.65529
3/30/2018 2:30:00 AM.000	942.8	1.35	2.09	3.55	0.3168	9.9625	3.99819
3/30/2018 2:35:00 AM.000	950	1.56	1.82	3.62	0.09635	9.9625	1.1623
3/30/2018 2:40:00 AM.000	867.3	1.01	1.61	3.83	0.41144	9.9575	3.2276
3/30/2018 2:45:00 AM.000	858.7	0.45	1.59	3.95	0.4043	9.96	1.77492
3/30/2018 2:50:00 AM.000	878.1	0.32	1.66	4.08	0.21348	9.96	1.10964
3/30/2018 2:55:00 AM.000	888.7	0.65	1.62	4.15	0.33279	9.9625	2.74922
3/30/2018 3:00:00 AM.000	948.7	1.24	1.5	4.22	0.45664	9.9575	5.20261
3/30/2018 3:05:00 AM.000	961.1	1.6	1.46	4.3	0.3317	9.9575	4.07803
3/30/2018 3:10:00 AM.000	976.3	1.28	1.34	4.43	0.40156	9.9575	3.27284
3/30/2018 3:15:00 AM.000	1022.1	0.44	1.12	4.56	0.55321	9.955	1.64439
3/30/2018 3:20:00 AM.000	1016.7	0.27	0.81	4.77	0.54161	9.955	1.41156
3/30/2018 3:25:00 AM.000	1042	0.35	0.72	4.87	0.59933	9.9525	2.76879
3/30/2018 3:30:00 AM.000	1062.4	0.87	0.64	4.82	0.72257	9.9475	5.84266
3/30/2018 3:35:00 AM.000	1018.7	1.76	0.38	4.82	0.71754	9.945	8.55148
3/30/2018 3:40:00 AM.000	1053.5	0.38	0.17	5.15	0.72967	9.9425	4.30567
3/30/2018 3:45:00 AM.000	1074.3	-0.03	0.18	5.26	0.75713	9.94	1.1924
3/30/2018 3:50:00 AM.000	1087.4	-0.03	0.13	5.14	0.74478	9.94	1.17294
3/30/2018 3:55:00 AM.000	1090.7	-0.03	0.32	4.98	0.70014	9.9375	1.10255
3/30/2018 4:00:00 AM.000	1118.5	-0.03	0.65	4.87	0.71468	9.9325	1.12532
3/30/2018 4:05:00 AM.000	1105.1	-0.03	0.75	4.63	0.71367	9.93	1.12366
3/30/2018 4:10:00 AM.000	1088.4	-0.03	0.97	4.43	0.69687	9.9275	1.09714
3/30/2018 4:15:00 AM.000	1041.8	-0.03	1.39	4.17	0.7149	9.925	1.12547
3/30/2018 4:20:00 AM.000	1026.7	-0.03	1.66	3.75	0.75948	9.92	1.19553
3/30/2018 4:25:00 AM.000	955.5	-0.03	1.85	3.54	0.7599	9.9175	1.19612
3/30/2018 4:30:00 AM.000	970.8	-0.03	2.26	3.5	0.75114	9.9175	1.18233
3/30/2018 4:35:00 AM.000	1021.7	-0.03	2.59	3.31	0.756	9.915	1.18991
3/30/2018 4:40:00 AM.000	996.1	-0.03	2.81	2.92	0.75752	9.91	1.19216
3/30/2018 4:45:00 AM.000	980	-0.03	3.25	2.72	0.75371	9.91	1.18617
3/30/2018 4:50:00 AM.000	989.5	-0.03	3.63	2.59	0.80368	9.905	1.26469
3/30/2018 4:55:00 AM.000	998.9	-0.03	3.86	2.35	0.89123	9.9025	1.40242
3/30/2018 5:00:00 AM.000	1001.2	0	4.26	2.11	0.95748	9.8975	0.712801
3/30/2018 5:05:00 AM.000	996.3	0.1	4.6	1.98	0.99525	9.8975	5.11861
3/30/2018 5:10:00 AM.000	990.6	0.46	4.33	1.81	1.04076	9.895	7.83756
3/30/2018 5:15:00 AM.000	980	1.21	3.96	1.89	1.08085	9.8925	11.1382
3/30/2018 5:20:00 AM.000	999.6	1.6	3.93	2.03	1.11022	9.8875	12.4998
3/30/2018 5:25:00 AM.000	982.4	1.85	3.56	2.16	1.1214	9.8875	11.5549
3/30/2018 5:30:00 AM.000	962.9	0.88	2.88	2.44	1.13227	9.885	7.30462
3/30/2018 5:35:00 AM.000	984	0.45	2.79	2.65	1.10731	9.8825	5.43598
3/30/2018 5:40:00 AM.000	1007.1	0.55	2.71	2.66	1.0621	9.8775	6.02486
3/30/2018 5:45:00 AM.000	983	0.57	2.3	2.78	1.03035	9.8775	6.78543
3/30/2018 5:50:00 AM.000	1067.9	0.7	2	3.05	0.98293	9.8725	9.47978
3/30/2018 5:55:00 AM.000	1000.1	1.34	1.9	3.19	0.9179	9.8675	11.0679
3/30/2018 6:00:00 AM.000	968.4	1.43	1.54	3.29	0.87086	9.865	9.8837
3/30/2018 6:05:00 AM.000	896.3	1.63	1.09	3.48	0.82032	9.865	8.9301
3/30/2018 6:10:00 AM.000	896.7	0.49	0.86	3.7	0.76117	9.865	4.55641
3/30/2018 6:15:00 AM.000	877.6	-0.03	0.86	3.89	0.76251	9.865	1.19874
3/30/2018 6:20:00 AM.000	861.4	-0.03	0.96	3.75	0.77166	9.8625	1.21306
3/30/2018 6:25:00 AM.000	875.1	-0.03	1.34	3.56	0.76964	9.86	1.20981
3/30/2018 6:30:00 AM.000	884.5	-0.03	1.51	3.35	0.77462	9.8525	1.21742
3/30/2018 6:35:00 AM.000	900.6	-0.03	1.68	3.2	0.79038	9.8525	1.2422
3/30/2018 6:40:00 AM.000	913	-0.03	2.11	2.92	0.7864	9.8475	1.2358
3/30/2018 6:45:00 AM.000	901.4	-0.03	2.33	2.78	0.7844	9.8475	1.23265
3/30/2018 6:50:00 AM.000	895.7	-0.03	2.56	2.69	0.7985	9.8425	1.25467
3/30/2018 6:55:00 AM.000	922.3	-0.03	2.95	2.41	0.79556	9.8425	1.25005
3/30/2018 7:00:00 AM.000	926.7	-0.03	3.24	2.23	0.77688	9.8375	1.22054
3/30/2018 7:05:00 AM.000	865.7	-0.03	3.53	1.96	0.78155	9.8375	1.22788
3/30/2018 7:10:00 AM.000	859.8	-0.03	3.93	1.82	0.76301	9.835	1.19867
3/30/2018 7:15:00 AM.000	850.7	-0.01	4.17	1.65	0.80543	9.8275	1.26511
3/30/2018 7:20:00 AM.000	681.8	0.3	4.48	1.41	0.8795	9.825	2.42008
3/30/2018 7:25:00 AM.000	508.6	0.32	4.59	1.23	0.92283	9.82	6.77564
3/30/2018 7:30:00 AM.000	485.7	0.34	4.15	1.25	0.98391	9.82	6.34548
3/30/2018 7:35:00 AM.000	476.4	0.76	3.98	1.38	1.04663	9.82	9.35877
3/30/2018 7:40:00 AM.000	481.2	1.53	3.86	1.46	1.08289	9.8175	11.3812
3/30/2018 7:45:00 AM.000	467.9	1.55	3.41	1.69	1.12756	9.815	11.7588
3/30/2018 7:50:00 AM.000	465.5	1.85	2.8	1.84	1.17501	9.815	13.7127
3/30/2018 7:55:00 AM.000	479.9	1.3	2.59	2.13	1.18317	9.8125	9.84045
3/30/2018 8:00:00 AM.000	474.1	0.57	2.35	2.41	1.20045	9.81	5.68601
3/30/2018 8:05:00 AM.000	463.4	0.86	1.89	2.66	1.21008	9.81	6.52008
3/30/2018 8:10:00 AM.000	457.5	1.07	1.61	2.87	1.18159	9.81	8.021
3/30/2018 8:15:00 AM.000	472.8	0.35	1.48	3.06	1.15775	9.805	6.11283
3/30/2018 8:20:00 AM.000	483.8	-0.02	1.25	3.1	1.14831	9.805	1.20237
3/30/2018 8:25:00 AM.000	500.3	-0.03	1.17	3.07	1.11107	9.805	1.74443
3/30/2018 8:30:00 AM.000	510.5	-0.03	1.24	2.91	1.07781	9.805	1.6922
3/30/2018 8:35:00 AM.000	510.9	-0.03	1.19	2.79	1.05569	9.805	1.65746
3/30/2018 8:40:00 AM.000	506.3	-0.03	1.13	2.68	1.00103	9.805	1.57162
3/30/2018 8:45:00 AM.000	489	-0.03	1.31	2.47	0.97059	9.805	1.52381
3/30/2018 8:50:00 AM.000	489.2	-0.03	1.6	2.36	0.93121	9.805	1.46197
3/30/2018 8:55:00 AM.000	490.8	-0.03	1.64	2.18	0.9244	9.805	1.45127
3/30/2018 9:00:00 AM.000	486.4	-0.03	1.78	1.91	0.91882	9.805	1.44251
3/30/2018 9:05:00 AM.000	488.5	-0.03	2.1	1.74	0.91756	9.8075	1.44062
3/30/2018 9:10:00 AM.000	497.6	-0.03	2.2	1.64	0.92494	9.81	1.45229
3/30/2018 9:15:00 AM.000	499.1	-0.03	2.24	1.54	0.913	9.8075	1.43346
3/30/2018 9:20:00 AM.000	495	-0.03	2.62	1.55	0.87848	9.81	1.37932
3/30/2018 9:25:00 AM.000	495.6	-0.03	2.77	1.39	0.88305	9.81	1.3865
3/30/2018 9:30:00 AM.000	495.5	0.02	2.86	1.13	0.87243	9.815	1.36998
3/30/2018 9:35:00 AM.000	502.6	0.29	3.12	0.93	0.87201	9.815	2.63255
3/30/2018 9:40:00 AM.000	513	0.33	3.19	0.78	0.92907	9.815	5.88772
3/30/2018 9:45:00 AM.000	496.8	0.68	3.07	0.81	0.98679	9.8225	6.40792
3/30/2018 9:50:00 AM.000	489.3	0.74	2.86	0.86	1.02332	9.825	8.16888
3/30/2018 9:55:00 AM.000	506.4	1.11	2.52	1.09	1.0783	9.825	9.99479
3/30/2018 10:00:00 AM.000	514.2	1.45	2.26	1.34	1.12308	9.8275	9.35397
3/30/2018 10:05:00 AM.000	489.5	1.44	1.92	1.53	1.12897	9.835	9.65738
3/30/2018 10:10:00 AM.000	487.4	2.42	1.49	1.92	1.16032	9.835	11.7247
3/30/2018 10:15:00 AM.000	498	1.02	1.11	2.15	1.16359	9.8375	8.13891
3/30/2018 10:20:00 AM.000	471.1	0	0.91	2.38	1.12464	9.8425	1.76197
3/30/2018 10:25:00 AM.000	198.3	-0.03	0.82	2.39	1.13073	9.8475	1.77709
3/30/2018 10:30:00 AM.000	225	-0.03	0.77	2.37	1.12445	9.85	1.76733
3/30/2018 10:35:00 AM.000	525.3	-0.03	0.76	2.17	1.08059	9.85	1.69837
3/30/2018 10:40:00 AM.000	864.4	-0.03	0.73	2	1.06275	9.855	1.67052
3/30/2018 10:45:00 AM.000	1000.2	-0.03	0.71	1.88	1.03147	9.86	1.62154
3/30/2018 10:50:00 AM.000	1010.6	-0.03	0.72	1.79	0.98118	9.865	1.54264
3/30/2018 10:55:00 AM.000	982.9	-0.03	0.72	1.69	0.92879	9.8675	1.46033
3/30/2018 11:00:00 AM.000	962	-0.03	0.73	1.61	0.89882	9.8725	1.41336
3/30/2018 11:05:00 AM.000	632.9	-0.03	1.15	1.5	0.88605	9.8775	1.39344
3/30/2018 11:10:00 AM.000	382.1	-0.03	1.53	1.22	0.85893	9.8825	1.35094
3/30/2018 11:15:00 AM.000	406.1	-0.03	1.4	1.06	0.86161	9.89	1.3554
3/30/2018 11:20:00 AM.000	517.7	-0.03	1.68	0.89	0.86072	9.8925	1.35408
3/30/2018 11:25:00 AM.000	517.8	0.11	2.11	0.77	0.84294	9.8925	1.3261
3/30/2018 11:30:00 AM.000	545.9	0.56	2.02	0.57	0.84587	9.895	5.34883
3/30/2018 11:35:00 AM.000	547	0.49	1.95	0.83	0.84608	9.9	7.27525
3/30/2018 11:40:00 AM.000	554	0.71	2.14	0.88	0.83443	9.9	6.69075
3/30/2018 11:45:00 AM.000	595.1	1.57	2.06	0.83	0.91073	9.9	9.06718
3/30/2018 11:50:00 AM.000	1057.4	1.58	1.69	1.01	0.95322	9.9025	8.48169
3/30/2018 11:55:00 AM.000	1288.4	1.74	1.33	1.33	0.9955	9.9075	10.9105
3/30/2018 12:00:00 PM.000	1235.6	1.49	1.01	1.66	1.06183	9.91	9.06025
3/30/2018 12:05:00 PM.000	948	0.53	0.77	1.84	1.09474	9.92	6.29954
3/30/2018 12:10:00 PM.000	808.5	0.42	0.57	1.97	1.12049	9.9225	7.50053
3/30/2018 12:15:00 PM.000	720.1	0.39	0.39	2.1	1.13896	9.925	9.92615
3/30/2018 12:20:00 PM.000	364.9	-0.02	0.31	2.22	1.1084	9.935	1.39231
3/30/2018 12:25:00 PM.000	269.1	-0.03	0.28	2.19	1.06582	9.94	1.67873
3/30/2018 12:30:00 PM.000	258.8	-0.03	0.28	2.02	1.05304	9.945	1.6588
3/30/2018 12:35:00 PM.000	250.2	-0.03	0.47	1.92	1.00212	9.955	1.57894
3/30/2018 12:40:00 PM.000	250.6	-0.03	0.56	1.74	0.98986	9.965	1.55999
3/30/2018 12:45:00 PM.000	264	-0.03	0.56	1.49	0.99681	9.9675	1.57103
3/30/2018 12:50:00 PM.000	641.4	-0.03	0.74	1.4	1.00359	9.975	1.582
3/30/2018 12:55:00 PM.000	824.6	-0.03	0.89	1.31	1.00434	9.9775	1.58328
3/30/2018 1:00:00 PM.000	953.4	-0.03	1.07	1.1	1.00222	9.985	1.58022
3/30/2018 1:05:00 PM.000	1214.3	-0.03	1.36	0.87	0.98543	9.995	1.55411
3/30/2018 1:10:00 PM.000	1189.3	0.05	1.63	0.75	1.02418	10	1.61543
3/30/2018 1:15:00 PM.000	1207.7	0.81	1.88	0.56	1.08243	10.01	5.99436
3/30/2018 1:20:00 PM.000	1192.3	1.31	1.85	0.57	1.10833	10.0175	9.17694
3/30/2018 1:25:00 PM.000	1194	0.97	1.21	0.76	1.17067	10.025	7.24544
3/30/2018 1:30:00 PM.000	1162.4	0.35	1.13	1.13	1.20855	10.035	4.90024
3/30/2018 1:35:00 PM.000	1167.9	0.23	1.19	1.25	1.20866	10.0375	4.62611
3/30/2018 1:40:00 PM.000	1181.6	0.61	0.91	1.23	1.21224	10.045	9.64857
3/30/2018 1:45:00 PM.000	1142.7	0.13	0.64	1.37	1.18639	10.055	7.77528
3/30/2018 1:50:00 PM.000	1117.3	-0.03	0.8	1.37	1.12252	10.065	1.77331
3/30/2018 1:55:00 PM.000	770	-0.03	0.78	1.2	1.06595	10.065	1.68392
3/30/2018 2:00:00 PM.000	554.5	-0.03	0.68	1.12	1.04599	10.075	1.65278
3/30/2018 2:05:00 PM.000	502	-0.03	1.09	1.1	1.01179	10.0825	1.59901
3/30/2018 2:10:00 PM.000	511.2	-0.03	1.34	0.97	0.98486	10.085	1.55653
3/30/2018 2:15:00 PM.000	558.2	-0.03	1.21	0.75	1.00426	10.095	1.58757
3/30/2018 2:20:00 PM.000	1059.9	-0.02	1.54	0.44	0.98734	10.0975	1.56091
3/30/2018 2:25:00 PM.000	1314.3	0.54	1.94	0.28	0.95901	10.105	1.88143
3/30/2018 2:30:00 PM.000	1251.6	1.16	1.9	0.37	0.95925	10.115	8.43672
3/30/2018 2:35:00 PM.000	1206.2	1.13	2	0.55	0.96693	10.1225	8.76381
3/30/2018 2:40:00 PM.000	1192.6	0.75	2.14	0.86	0.97135	10.1275	8.74445
3/30/2018 2:45:00 PM.000	1181.3	0.57	2.2	0.82	1.0246	10.135	7.97744
3/30/2018 2:50:00 PM.000	1164.2	1	2.26	0.88	1.08679	10.14	10.992
3/30/2018 2:55:00 PM.000	1155	1.37	2.11	1.04	1.12231	10.15	12.114
3/30/2018 3:00:00 PM.000	1144.2	1.83	1.4	1.31	1.18276	10.1575	13.9243
3/30/2018 3:05:00 PM.000	1119.1	1.36	1.13	1.56	1.22244	10.1625	11.3661
3/30/2018 3:10:00 PM.000	697.2	0.57	1.08	1.9	1.23904	10.17	5.88754
3/30/2018 3:15:00 PM.000	551	0.15	0.7	1.99	1.2856	10.1775	6.3241
3/30/2018 3:20:00 PM.000	531.2	-0.03	0.58	2.1	1.25391	10.18	0.486909
3/30/2018 3:25:00 PM.000	528.3	-0.03	0.7	2.06	1.2115	10.19	1.9196
3/30/2018 3:30:00 PM.000	580.1	-0.03	0.85	1.75	1.2252	10.1925	1.94143
3/30/2018 3:35:00 PM.000	998.7	-0.03	1	1.73	1.19706	10.2	1.89717
3/30/2018 3:40:00 PM.000	1184.9	-0.03	1.22	1.62	1.1288	10.2	1.78896
3/30/2018 3:45:00 PM.000	1186.2	-0.03	1.66	1.46	1.11739	10.21	1.77129
3/30/2018 3:50:00 PM.000	1153.9	-0.03	2.02	1.29	1.12135	10.21	1.77757
3/30/2018 3:55:00 PM.000	1194.1	-0.03	2.3	1.1	1.11681	10.22	1.77079
3/30/2018 4:00:00 PM.000	1182.1	0.05	2.75	0.94	1.12144	10.2225	1.18421
3/30/2018 4:05:00 PM.000	1123.9	0.18	3.12	0.76	1.12671	10.23	8.13136
3/30/2018 4:10:00 PM.000	1125.3	0.6	3.31	0.73	1.17418	10.2375	9.01745
3/30/2018 4:15:00 PM.000	1128.6	0.83	3.34	0.96	1.21269	10.24	10.7356
3/30/2018 4:20:00 PM.000	1118.1	0.74	3.14	1.03	1.26286	10.2475	10.7356
3/30/2018 4:25:00 PM.000	1113.6	1.11	2.63	1.1	1.31383	10.25	14.8082
3/30/2018 4:30:00 PM.000	1135	1.63	2.41	1.2	1.33811	10.255	15.9941
3/30/2018 4:35:00 PM.000	946.7	1.74	2.23	1.49	1.35306	10.2575	14.3695
3/30/2018 4:40:00 PM.000	597.8	0.8	1.62	1.83	1.38262	10.2575	8.0498
3/30/2018 4:45:00 PM.000	502.8	0.42	1.4	2.14	1.37982	10.265	7.47526
3/30/2018 4:50:00 PM.000	489.5	0.11	1.33	2.2	1.33657	10.265	5.80321
3/30/2018 4:55:00 PM.000	494.2	-0.03	1.26	2.31	1.2896	10.2675	2.04714
3/30/2018 5:00:00 PM.000	601.8	-0.03	1.14	2.13	1.26925	10.2725	2.01507
3/30/2018 5:05:00 PM.000	1004.1	-0.03	1.53	2.01	1.21142	10.275	1.92335
3/30/2018 5:10:00 PM.000	1120.1	-0.03	1.87	1.8	1.17103	10.2775	1.85932
3/30/2018 5:15:00 PM.000	1179	-0.03	1.99	1.69	1.15376	10.2775	1.83189
3/30/2018 5:20:00 PM.000	1181.6	-0.03	2.47	1.63	1.14055	10.285	1.81123
3/30/2018 5:25:00 PM.000	1151.8	-0.03	2.99	1.36	1.13751	10.2875	1.80651
3/30/2018 5:30:00 PM.000	1137.7	-0.01	3.25	1.16	1.15423	10.29	1.83318
3/30/2018 5:35:00 PM.000	1133.8	0.16	3.69	0.94	1.15568	10.2925	5.32887
3/30/2018 5:40:00 PM.000	1124.9	0.64	4.09	0.85	1.12511	10.2925	10.9109
3/30/2018 5:45:00 PM.000	896.4	1.33	4.13	0.88	1.10008	10.2975	12.2571
3/30/2018 5:50:00 PM.000	555.6	1.44	4.05	1.02	1.10319	10.2975	11.2631
3/30/2018 5:55:00 PM.000	481.4	1.12	4.09	1.25	1.10639	10.3	9.44641
3/30/2018 6:00:00 PM.000	474.3	0.91	3.87	1.44	1.18432	10.3025	9.04653
3/30/2018 6:05:00 PM.000	470.7	0.97	3.68	1.51	1.24345	10.3025	8.8858
3/30/2018 6:10:00 PM.000	481.6	1.1	3.2	1.81	1.28716	10.3025	9.50836
3/30/2018 6:15:00 PM.000	594.4	1.13	2.84	2.1	1.3452	10.3025	9.89295
3/30/2018 6:20:00 PM.000	1010.9	1.26	2.53	2.32	1.38876	10.3025	10.001
3/30/2018 6:25:00 PM.000	1159	1.29	2.14	2.45	1.40839	10.3025	10.6936
3/30/2018 6:30:00 PM.000	1168.2	0.71	1.77	2.76	1.43921	10.3025	8.08022
3/30/2018 6:35:00 PM.000	1166.2	0.5	1.54	2.99	1.43926	10.305	7.21856
3/30/2018 6:40:00 PM.000	1112.7	0.01	1.39	3.01	1.41896	10.3025	4.84377
3/30/2018 6:45:00 PM.000	1100.4	-0.03	1.3	3.05	1.38786	10.305	2.20511
3/30/2018 6:50:00 PM.000	1072.3	-0.03	1.28	3	1.32856	10.31	2.11112
3/30/2018 6:55:00 PM.000	1077.4	-0.03	1.31	2.81	1.25189	10.31	1.98927
3/30/2018 7:00:00 PM.000	620.4	-0.03	1.48	2.58	1.24722	10.31	1.98184
3/30/2018 7:05:00 PM.000	531.9	-0.03	2.19	2.44	1.21335	10.31	1.92801
3/30/2018 7:10:00 PM.000	548.9	-0.03	2.19	2.25	1.18766	10.3125	1.88729
3/30/2018 7:15:00 PM.000	551.9	-0.03	2.21	2.23	1.18971	10.31	1.89044
3/30/2018 7:20:00 PM.000	549.9	-0.03	2.86	2.08	1.17411	10.3075	1.86554
3/30/2018 7:25:00 PM.000	548.5	-0.03	3.05	1.8	1.14546	10.3075	1.82
3/30/2018 7:30:00 PM.000	824	-0.03	3.04	1.62	1.09817	10.31	1.74495
3/30/2018 7:35:00 PM.000	1122.6	0.24	3.54	1.62	1.09087	10.3075	1.73325
3/30/2018 7:40:00 PM.000	1182.9	1.13	3.84	1.31	1.07657	10.3075	7.05195
3/30/2018 7:45:00 PM.000	1190.5	0.8	3.8	1.28	1.10029	10.3075	11.1817
3/30/2018 7:50:00 PM.000	1101.9	0.62	3.93	1.42	1.09395	10.3075	11.5976
3/30/2018 7:55:00 PM.000	704.1	0.89	4.23	1.65	1.12951	10.3125	14.1413
3/30/2018 8:00:00 PM.000	552.4	1.24	4.15	1.87	1.19674	10.31	14.6563
3/30/2018 8:05:00 PM.000	512.4	1.42	3.58	1.92	1.24832	10.3075	14.0187
3/30/2018 8:10:00 PM.000	505.4	1.46	3	2.15	1.30727	10.3125	13.2676
3/30/2018 8:15:00 PM.000	524	1.24	2.89	2.41	1.3666	10.31	13.5071
3/30/2018 8:20:00 PM.000	517.8	1.25	2.62	2.62	1.40958	10.31	17.6789
3/30/2018 8:25:00 PM.000	508.5	1.81	1.92	2.9	1.45692	10.3075	19.8063
3/30/2018 8:30:00 PM.000	568.3	1.33	1.63	3.26	1.49742	10.31	15.3311
3/30/2018 8:35:00 PM.000	976.3	0.07	1.51	3.52	1.5036	10.31	4.92049
3/30/2018 8:40:00 PM.000	1183.1	-0.03	1.29	3.64	1.50014	10.31	2.38383
3/30/2018 8:45:00 PM.000	1180.8	-0.03	1.19	3.44	1.47494	10.31	2.34377
3/30/2018 8:50:00 PM.000	1151.5	-0.03	1.32	3.32	1.41397	10.3075	2.24674
3/30/2018 8:55:00 PM.000	1155.6	-0.03	1.29	3.1	1.35627	10.31	2.15517
3/30/2018 9:00:00 PM.000	1158.3	-0.03	1.2	2.99	1.29724	10.3075	2.06122
3/30/2018 9:05:00 PM.000	1085.7	-0.03	1.42	2.93	1.27146	10.31	2.02037
3/30/2018 9:10:00 PM.000	689.6	-0.03	2.13	2.59	1.22809	10.31	1.95144
3/30/2018 9:15:00 PM.000	533.2	-0.03	2.34	2.23	1.18853	10.31	1.88857
3/30/2018 9:20:00 PM.000	506.8	-0.03	2.38	2.13	1.15693	10.31	1.83834
3/30/2018 9:25:00 PM.000	512.6	-0.03	2.85	2.02	1.12373	10.31	1.78557
3/30/2018 9:30:00 PM.000	516.8	-0.03	3.17	1.87	1.11372	10.3125	1.76977
3/30/2018 9:35:00 PM.000	528.9	-0.03	3.23	1.78	1.12602	10.3125	1.78932
3/30/2018 9:40:00 PM.000	593.5	0.08	3.59	1.51	1.13328	10.31	1.3096
3/30/2018 9:45:00 PM.000	986	0.51	3.79	1.28	1.12288	10.31	10.3366
3/30/2018 9:50:00 PM.000	1128.3	0.71	3.68	1.24	1.113	10.31	10.7577
3/30/2018 9:55:00 PM.000	1146.6	0.81	3.82	1.41	1.09464	10.31	10.8206
3/30/2018 10:00:00 PM.000	1140.8	0.98	4.06	1.58	1.08565	10.31	13.3763
3/30/2018 10:05:00 PM.000	1098.6	1.05	3.95	1.64	1.11773	10.3125	14.019
3/30/2018 10:10:00 PM.000	784.8	1.46	3.86	1.86	1.19843	10.315	14.0856
3/30/2018 10:15:00 PM.000	546.9	1.73	3.85	1.99	1.2466	10.315	13.798
3/30/2018 10:20:00 PM.000	503.4	1.54	3.04	2.25	1.31375	10.315	15.7857
3/30/2018 10:25:00 PM.000	501.7	1.27	2.5	2.6	1.37551	10.315	15.2473
3/30/2018 10:30:00 PM.000	504.8	1.08	2.51	2.85	1.4147	10.31	12.9831
3/30/2018 10:35:00 PM.000	511.2	1.09	2.14	2.99	1.47065	10.3075	12.4958
3/30/2018 10:40:00 PM.000	516.8	1.12	1.5	3.25	1.50691	10.305	12.629
3/30/2018 10:45:00 PM.000	852.7	1.03	1.3	3.5	1.51826	10.305	13.463
3/30/2018 10:50:00 PM.000	1089.7	0.39	1.21	3.71	1.52777	10.305	11.8887
3/30/2018 10:55:00 PM.000	1130.4	-0.03	0.88	3.9	1.5031	10.305	2.38825
3/30/2018 11:00:00 PM.000	1157.2	-0.03	0.81	3.97	1.44119	10.3	2.28959
3/30/2018 11:05:00 PM.000	1138.7	-0.03	0.98	3.7	1.3891	10.3	2.20682
3/30/2018 11:10:00 PM.000	1106.3	-0.03	0.88	3.37	1.34221	10.3	2.13231
3/30/2018 11:15:00 PM.000	778.4	-0.03	0.79	3.26	1.29536	10.305	2.05811
3/30/2018 11:20:00 PM.000	532.3	-0.03	1.31	3.19	1.2789	10.305	2.03195
3/30/2018 11:25:00 PM.000	488.9	-0.03	1.7	2.92	1.23041	10.3025	1.95478
3/30/2018 11:30:00 PM.000	488.8	-0.03	1.56	2.66	1.18134	10.3	1.87669
3/30/2018 11:35:00 PM.000	494.1	-0.03	1.93	2.52	1.14508	10.2975	1.81897
3/30/2018 11:40:00 PM.000	489.9	-0.03	2.4	2.39	1.1175	10.2975	1.77515
3/30/2018 11:45:00 PM.000	483.8	-0.03	2.34	2.26	1.1119	10.3	1.76635
3/30/2018 11:50:00 PM.000	575	-0.03	2.61	2.08	1.12769	10.2975	1.79134
3/30/2018 11:55:00 PM.000	981.7	-0.03	3.09	1.92	1.12808	10.2975	1.79196
3/31/2018 12:00:00 AM.000	1142.3	-0.03	3.18	1.71	1.13319	10.2975	1.80008
3/31/2018 12:05:00 AM.000	1140.9	0.04	3.59	1.61	1.11269	10.2975	1.7675
3/31/2018 12:10:00 AM.000	1112.6	0.31	4.05	1.36	1.09458	10.2975	5.9469
3/31/2018 12:15:00 AM.000	862.2	0.51	4.1	1.08	1.09381	10.2975	10.4916
3/31/2018 12:20:00 AM.000	560.3	1.02	4.09	1.19	1.09071	10.295	12.0088
3/31/2018 12:25:00 AM.000	493.9	1.3	4.26	1.41	1.08293	10.295	13.9104
3/31/2018 12:30:00 AM.000	487.8	1.54	3.94	1.54	1.16437	10.2975	13.7989
3/31/2018 12:35:00 AM.000	493	1.49	3.62	1.74	1.23498	10.2975	12.6409
3/31/2018 12:40:00 AM.000	507.2	0.99	3.11	2.12	1.26292	10.2975	10.0485
3/31/2018 12:45:00 AM.000	493.2	0.63	2.85	2.21	1.33586	10.2975	10.2406
3/31/2018 12:50:00 AM.000	493.1	1.28	2.58	2.25	1.3962	10.2975	10.4963
3/31/2018 12:55:00 AM.000	497.4	0.96	2.17	2.47	1.40895	10.2975	9.55368
3/31/2018 1:00:00 AM.000	704	0.82	1.82	2.78	1.45608	10.2975	9.46607
3/31/2018 1:05:00 AM.000	1059.7	1.44	1.52	2.99	1.47448	10.2975	13.6368
3/31/2018 1:10:00 AM.000	1131.1	0.8	1.17	3.17	1.42982	10.2975	10.6202
3/31/2018 1:15:00 AM.000	1151	-0.02	1	3.27	1.41121	10.295	0.249958
3/31/2018 1:20:00 AM.000	1105.4	-0.03	0.91	3.21	1.34712	10.2925	2.13973
3/31/2018 1:25:00 AM.000	1113.2	-0.03	0.97	3.18	1.27107	10.295	2.01903
3/31/2018 1:30:00 AM.000	1132.2	-0.03	0.93	3.08	1.21976	10.2925	1.9374
3/31/2018 1:35:00 AM.000	803	-0.03	0.91	2.99	1.1749	10.2975	1.86635
3/31/2018 1:40:00 AM.000	524.9	-0.03	1.11	2.82	1.16772	10.295	1.85483
3/31/2018 1:45:00 AM.000	529.4	-0.03	1.59	2.56	1.10871	10.295	1.76108
3/31/2018 1:50:00 AM.000	532.5	-0.03	1.64	2.38	1.08183	10.295	1.71837
3/31/2018 1:55:00 AM.000	535.7	-0.03	1.78	2.22	1.05648	10.295	1.67809
3/31/2018 2:00:00 AM.000	534.7	-0.03	2.26	1.99	1.03369	10.2925	1.64179
3/31/2018 2:05:00 AM.000	516.7	-0.03	2.37	1.81	1.0251	10.2925	1.62814
3/31/2018 2:10:00 AM.000	514.8	-0.03	2.5	1.6	1.03443	10.2925	1.64296
3/31/2018 2:15:00 AM.000	527	-0.03	2.83	1.48	1.02709	10.29	1.6312
3/31/2018 2:20:00 AM.000	537.6	-0.03	3.08	1.3	1.02136	10.29	1.6221
3/31/2018 2:25:00 AM.000	539.1	0.18	3.2	1.12	1.02244	10.2925	1.41786
3/31/2018 2:30:00 AM.000	539.4	0.62	3.29	0.93	1.01385	10.29	8.45333
3/31/2018 2:35:00 AM.000	545.8	0.84	3.33	1	1.0191	10.29	9.91609
3/31/2018 2:40:00 AM.000	549.6	0.85	3.13	1.15	1.11081	10.2875	10.03
3/31/2018 2:45:00 AM.000	535.2	0.98	2.99	1.14	1.16289	10.2875	11.3274
3/31/2018 2:50:00 AM.000	531.3	1.68	2.5	1.27	1.20854	10.29	14.1413
3/31/2018 2:55:00 AM.000	521.1	1.35	2.05	1.54	1.29123	10.2875	14.678
3/31/2018 3:00:00 AM.000	525.9	1.39	1.81	1.81	1.32751	10.2875	13.4941
3/31/2018 3:05:00 AM.000	515.2	1.35	1.43	2.01	1.36698	10.285	13.0978
3/31/2018 3:10:00 AM.000	523.8	1.18	0.97	2.28	1.41821	10.285	16.0187
3/31/2018 3:15:00 AM.000	531.5	0.23	0.73	2.57	1.40621	10.2825	9.49331
3/31/2018 3:20:00 AM.000	525.3	-0.03	0.74	2.69	1.38467	10.2825	2.19887
3/31/2018 3:25:00 AM.000	537.7	-0.03	0.61	2.52	1.38552	10.28	2.20009
3/31/2018 3:30:00 AM.000	896.7	-0.03	0.57	2.52	1.33459	10.28	2.1192
3/31/2018 3:35:00 AM.000	1139.9	-0.03	0.62	2.41	1.27669	10.2775	2.02712
3/31/2018 3:40:00 AM.000	1183.4	-0.03	0.59	2.29	1.228	10.2775	1.94979
3/31/2018 3:45:00 AM.000	1149.6	-0.03	0.58	2.16	1.18791	10.2775	1.88612
3/31/2018 3:50:00 AM.000	1084.1	-0.03	0.95	1.96	1.17867	10.2775	1.87145
3/31/2018 3:55:00 AM.000	608.7	-0.03	1.52	1.71	1.1283	10.2725	1.79124
3/31/2018 4:00:00 AM.000	533.7	-0.03	1.62	1.51	1.11815	10.2725	1.77513
3/31/2018 4:05:00 AM.000	531.5	-0.03	1.7	1.25	1.09281	10.2725	1.73489
3/31/2018 4:10:00 AM.000	536.9	-0.03	2.23	1.08	1.06558	10.275	1.69175
3/31/2018 4:15:00 AM.000	550.2	-0.02	2.38	0.94	1.04514	10.275	1.65929
3/31/2018 4:20:00 AM.000	542.8	0.35	2.48	0.92	1.03153	10.2725	3.47008
3/31/2018 4:25:00 AM.000	536.3	0.62	2.69	0.69	1.01033	10.275	8.9076
3/31/2018 4:30:00 AM.000	532.3	0.97	2.71	0.7	1.07524	10.275	11.6135
3/31/2018 4:35:00 AM.000	520.5	1.4	2.44	0.92	1.14218	10.27	12.9396
3/31/2018 4:40:00 AM.000	536.1	1.52	2.09	1.1	1.19371	10.27	12.1729
3/31/2018 4:45:00 AM.000	523.7	0.78	1.67	1.27	1.26773	10.27	9.22035
3/31/2018 4:50:00 AM.000	516.8	0.56	1.49	1.4	1.323	10.27	8.19623
3/31/2018 4:55:00 AM.000	534	0.9	1.25	1.52	1.34377	10.27	8.73576
3/31/2018 5:00:00 AM.000	537.3	0.31	0.89	1.84	1.37822	10.27	8.05388
3/31/2018 5:05:00 AM.000	527.9	-0.03	0.82	2.06	1.36943	10.27	2.17402
3/31/2018 5:10:00 AM.000	527.5	-0.03	0.82	1.94	1.33067	10.27	2.11247
3/31/2018 5:15:00 AM.000	530.6	-0.03	0.78	1.73	1.30125	10.2675	2.06563
3/31/2018 5:20:00 AM.000	532.7	-0.03	0.74	1.54	1.24866	10.2675	1.98213
3/31/2018 5:25:00 AM.000	532.6	-0.03	0.88	1.37	1.21508	10.265	1.9287
3/31/2018 5:30:00 AM.000	529.1	-0.03	1.19	1.21	1.17403	10.265	1.86353
3/31/2018 5:35:00 AM.000	535.7	-0.03	1.25	1	1.1588	10.265	1.83935
3/31/2018 5:40:00 AM.000	536.8	-0.03	1.42	0.92	1.13341	10.26	1.79882
3/31/2018 5:45:00 AM.000	519	0.09	1.74	0.78	1.09709	10.26	1.74117
3/31/2018 5:50:00 AM.000	511.1	0.68	1.77	0.65	1.08292	10.26	6.60753
3/31/2018 5:55:00 AM.000	517.7	1.11	1.64	0.64	1.05631	10.26	9.62081
3/31/2018 6:00:00 AM.000	518.4	0.77	1.56	0.75	1.062	10.26	8.29964
3/31/2018 6:05:00 AM.000	520	0.51	1.59	0.89	1.14732	10.26	8.028
3/31/2018 6:10:00 AM.000	521.3	1.1	1.35	0.95	1.20142	10.26	12.79
3/31/2018 6:15:00 AM.000	533.3	1.9	0.81	1.15	1.21905	10.26	16.2652
3/31/2018 6:20:00 AM.000	537	1.15	0.6	1.42	1.28374	10.26	9.77835
3/31/2018 6:25:00 AM.000	536	0.56	0.46	1.65	1.30114	10.2575	6.44869
3/31/2018 6:30:00 AM.000	537.7	0.19	0.18	1.8	1.26888	10.2525	4.34098
3/31/2018 6:35:00 AM.000	536.1	-0.03	0.1	1.94	1.27438	10.2525	0.440307
3/31/2018 6:40:00 AM.000	525.2	-0.03	0.12	1.92	1.24151	10.2525	1.97008
3/31/2018 6:45:00 AM.000	518.9	-0.03	0.1	1.68	1.18091	10.2525	1.8739
3/31/2018 6:50:00 AM.000	507.1	-0.03	0.09	1.56	1.13858	10.25	1.8066
3/31/2018 6:55:00 AM.000	518.1	-0.03	0.16	1.3	1.12575	10.25	1.78624
3/31/2018 7:00:00 AM.000	516.6	-0.03	0.37	1.16	1.06316	10.245	1.6867
3/31/2018 7:05:00 AM.000	505.8	-0.03	0.4	1.09	1.04769	10.245	1.66215
3/31/2018 7:10:00 AM.000	516.5	-0.03	0.51	0.89	1.0426	10.245	1.65408
3/31/2018 7:15:00 AM.000	527.8	-0.03	0.72	0.72	1.00553	10.245	1.59525
3/31/2018 7:20:00 AM.000	535	-0.03	0.87	0.6	0.99302	10.245	1.5754
3/31/2018 7:25:00 AM.000	537	-0.03	1	0.41	1.01967	10.245	1.61769
3/31/2018 7:30:00 AM.000	539.3	-0.03	1.3	0.25	1.03995	10.2425	1.64977
3/31/2018 7:35:00 AM.000	530	-0.03	1.55	0.27	1.11787	10.2375	1.77321
3/31/2018 7:40:00 AM.000	518.5	0.01	1.71	0.41	1.13881	10.2375	0.634961
3/31/2018 7:45:00 AM.000	510.5	0.12	1.89	0.41	1.13592	10.2375	4.48077
3/31/2018 7:50:00 AM.000	497.1	0.38	1.81	0.47	1.15083	10.24	7.98399
3/31/2018 7:55:00 AM.000	524.9	0.65	1.48	0.52	1.1468	10.2375	8.9492
3/31/2018 8:00:00 AM.000	571.1	1.11	1.4	0.42	1.09327	10.24	9.9633
3/31/2018 8:05:00 AM.000	576.4	1.22	1.16	0.59	1.06649	10.2375	10.1334
3/31/2018 8:10:00 AM.000	581.2	0.78	0.76	0.87	1.04378	10.2375	10.0117
3/31/2018 8:15:00 AM.000	577.6	0.43	0.54	1.09	0.95665	10.235	9.56853
3/31/2018 8:20:00 AM.000	578.6	-0.02	0.55	1.04	0.91057	10.2375	1.38293
3/31/2018 8:25:00 AM.000	575.8	-0.03	0.66	0.96	0.9101	10.2375	1.44355
3/31/2018 8:30:00 AM.000	573.9	-0.03	0.83	0.83	0.90232	10.24	1.43129
3/31/2018 8:35:00 AM.000	574.8	-0.03	0.95	0.73	0.88486	10.2375	1.40351
3/31/2018 8:40:00 AM.000	569.7	-0.03	1.16	0.58	0.86599	10.2375	1.37357
3/31/2018 8:45:00 AM.000	571.1	0.06	1.45	0.48	0.90342	10.2375	1.43295
3/31/2018 8:50:00 AM.000	573.4	0.4	1.52	0.41	0.95026	10.2375	4.81086
3/31/2018 8:55:00 AM.000	585.5	0.56	1.35	0.3	0.95144	10.2375	7.121
3/31/2018 9:00:00 AM.000	580.5	0.65	0.96	0.43	0.97574	10.24	7.26619
3/31/2018 9:05:00 AM.000	563.1	0.88	0.89	0.83	0.99705	10.24	11.0857
3/31/2018 9:10:00 AM.000	572.5	1.57	0.69	0.83	0.92587	10.24	12.7199
3/31/2018 9:15:00 AM.000	576.2	0.94	0.3	0.99	0.88857	10.2425	7.43157
3/31/2018 9:20:00 AM.000	574.7	-0.01	0.19	1.24	0.85457	10.2425	1.30832
3/31/2018 9:25:00 AM.000	564	-0.03	0.23	1.14	0.80642	10.2425	1.2792
3/31/2018 9:30:00 AM.000	557.7	-0.03	0.44	1.01	0.77905	10.2425	1.23577
3/31/2018 9:35:00 AM.000	562.2	-0.03	0.52	0.85	0.7945	10.2425	1.26029
3/31/2018 9:40:00 AM.000	564.6	-0.03	0.63	0.67	0.76606	10.2425	1.21516
3/31/2018 9:45:00 AM.000	561.3	-0.02	0.87	0.48	0.73694	10.245	1.16902
3/31/2018 9:50:00 AM.000	562.9	0.18	1.03	0.39	0.74082	10.2475	2.29806
3/31/2018 9:55:00 AM.000	575.3	0.98	1.01	0.35	0.78964	10.25	8.14039
3/31/2018 10:00:00 AM.000	574.2	1.65	0.88	0.42	0.80018	10.25	6.93716
3/31/2018 10:05:00 AM.000	557.9	0.73	0.5	0.56	0.84016	10.25	3.96275
3/31/2018 10:10:00 AM.000	561.9	0.42	0.34	0.72	0.88403	10.2475	6.71966
3/31/2018 10:15:00 AM.000	573.3	0.8	0.25	0.88	0.80504	10.2475	8.50639
3/31/2018 10:20:00 AM.000	567	1.02	0.11	1.12	0.78262	10.2475	8.95803
3/31/2018 10:25:00 AM.000	570.4	0.21	0.07	1.32	0.75445	10.2525	5.31182
3/31/2018 10:30:00 AM.000	579.8	-0.03	0.07	1.35	0.64183	10.2525	1.01827
3/31/2018 10:35:00 AM.000	579.2	-0.03	0.08	1.23	0.62717	10.2525	0.995001
3/31/2018 10:40:00 AM.000	586.8	-0.03	0.1	1.07	0.63397	10.2525	1.00579
3/31/2018 10:45:00 AM.000	578.4	-0.03	0.13	0.86	0.63208	10.2525	1.00279
3/31/2018 10:50:00 AM.000	569.9	-0.03	0.27	0.76	0.59686	10.2525	0.946893
3/31/2018 10:55:00 AM.000	579.4	0.12	0.53	0.58	0.62248	10.255	0.987616
3/31/2018 11:00:00 AM.000	590.4	0.75	0.5	0.39	0.6893	10.255	4.10307
3/31/2018 11:05:00 AM.000	580	0.97	0.3	0.49	0.65991	10.255	5.45895
3/31/2018 11:10:00 AM.000	593.9	0.69	0.11	0.78	0.69447	10.2575	4.58965
3/31/2018 11:15:00 AM.000	880.2	0.72	0.09	0.95	0.72145	10.2575	4.15471
3/31/2018 11:20:00 AM.000	1204.6	0.35	0.08	0.98	0.62338	10.26	2.30974
3/31/2018 11:25:00 AM.000	1273.3	0.14	0.07	1.1	0.57979	10.2575	2.69643
3/31/2018 11:30:00 AM.000	1253.3	-0.03	0.06	1.1	0.50964	10.26	0.533257
3/31/2018 11:35:00 AM.000	1244.3	-0.03	0.07	1.08	0.38795	10.2625	0.615458
3/31/2018 11:40:00 AM.000	1187	-0.03	0.16	1.01	0.38579	10.2625	0.612028
3/31/2018 11:45:00 AM.000	727.5	-0.03	0.39	0.84	0.41211	10.265	0.653852
3/31/2018 11:50:00 AM.000	577.1	-0.03	0.59	0.67	0.40148	10.265	0.636975
3/31/2018 11:55:00 AM.000	551.6	-0.03	0.77	0.53	0.41968	10.2675	0.66591
3/31/2018 12:00:00 PM.000	553.2	0.08	1.02	0.43	0.41062	10.27	1.13134
3/31/2018 12:05:00 PM.000	552.7	0.9	1.14	0.48	0.49117	10.27	4.61317
3/31/2018 12:10:00 PM.000	566.7	1.5	0.95	0.59	0.52067	10.27	5.28758
3/31/2018 12:15:00 PM.000	575.2	0.81	0.62	0.64	0.54019	10.2725	3.6856
3/31/2018 12:20:00 PM.000	571.7	0.23	0.52	0.83	0.58985	10.2675	2.59948
3/31/2018 12:25:00 PM.000	576.3	0.37	0.46	0.99	0.53321	10.27	2.09868
3/31/2018 12:30:00 PM.000	579.6	0.38	0.24	1.04	0.4837	10.2725	2.67972
3/31/2018 12:35:00 PM.000	586.4	-0.02	0.11	1.03	0.35128	10.27	0.708465
3/31/2018 12:40:00 PM.000	578.7	-0.03	0.16	1.02	0.21846	10.27	0.346441
3/31/2018 12:45:00 PM.000	714.9	-0.03	0.36	0.79	0.30032	10.27	0.476423
3/31/2018 12:50:00 PM.000	1147	-0.03	0.45	0.69	0.24676	10.27	0.391378
3/31/2018 12:55:00 PM.000	1296.7	-0.03	0.55	0.57	0.21882	10.2725	0.347034
3/31/2018 1:00:00 PM.000	1304	-0.03	1.13	0.32	0.2797	10.2725	0.443708
3/31/2018 1:05:00 PM.000	1246.1	-0.02	1.61	0.2	0.26262	10.275	0.175882
3/31/2018 1:10:00 PM.000	1234	0.12	1.69	0.23	0.31177	10.275	1.87365
3/31/2018 1:15:00 PM.000	1162.4	0.49	2.04	0.31	0.36408	10.28	2.60114
3/31/2018 1:20:00 PM.000	719	0.69	1.71	0.31	0.35523	10.2775	3.08089
3/31/2018 1:25:00 PM.000	575.8	0.93	1.27	0.35	0.38358	10.275	4.27802
3/31/2018 1:30:00 PM.000	555.8	0.89	1.24	0.53	0.29482	10.28	3.1273
3/31/2018 1:35:00 PM.000	543.6	0.76	1.1	0.77	0.0551	10.28	0.545899
3/31/2018 1:40:00 PM.000	562.1	0.23	0.66	1.05	0	10.2775	0
3/31/2018 1:45:00 PM.000	639.2	-0.03	0.63	1.21	0	10.2775	-0.000441937
3/31/2018 1:50:00 PM.000	1047.2	-0.03	0.97	1.11	0	10.2775	-0.000441937
3/31/2018 1:55:00 PM.000	1236.2	-0.03	1.22	0.81	0	10.28	-0.00044193
3/31/2018 2:00:00 PM.000	1234.3	-0.03	1.42	0.61	0	10.2825	-0.000441923
3/31/2018 2:05:00 PM.000	1235.3	-0.03	1.97	0.54	0	10.2825	-0.000441923
3/31/2018 2:10:00 PM.000	1212.6	0.19	2.36	0.46	0	10.2825	0
3/31/2018 2:15:00 PM.000	1206.9	1.04	2.3	0.36	0	10.285	0
3/31/2018 2:20:00 PM.000	1184.4	0.88	2.62	0.44	0	10.285	0
3/31/2018 2:25:00 PM.000	816.3	0.99	2.6	0.69	0	10.285	0
3/31/2018 2:30:00 PM.000	598	0.84	1.73	0.85	0.00424	10.2825	0.0353163
3/31/2018 2:35:00 PM.000	559.7	0.82	1.65	1.01	0.04854	10.285	0.452279
3/31/2018 2:40:00 PM.000	563.1	1.52	1.75	1.13	0.03822	10.285	0.397385
3/31/2018 2:45:00 PM.000	557.7	1.31	1.11	1.39	0.04245	10.2825	0.341756
3/31/2018 2:50:00 PM.000	608.4	0.32	0.68	1.75	0.04634	10.2825	0.215376
3/31/2018 2:55:00 PM.000	1038.2	-0.01	0.78	1.86	0.00774	10.2825	0.0266764
3/31/2018 3:00:00 PM.000	1204.8	-0.03	0.79	1.77	0	10.2825	-0.000441923
3/31/2018 3:05:00 PM.000	1242.4	-0.03	0.9	1.63	0.01456	10.2825	0.0226841
3/31/2018 3:10:00 PM.000	1224.4	-0.03	1.54	1.49	0.0018	10.2825	0.00241707
3/31/2018 3:15:00 PM.000	1248.8	-0.03	1.79	1.32	0	10.2825	-0.000441923
3/31/2018 3:20:00 PM.000	1212.5	-0.03	1.99	1.19	0	10.2825	-0.000441923
3/31/2018 3:25:00 PM.000	1187.5	-0.03	2.7	1.05	0	10.2825	-0.000441923
3/31/2018 3:30:00 PM.000	936.1	0.12	3.16	0.7	0	10.2825	0
3/31/2018 3:35:00 PM.000	610.2	0.67	3.18	0.47	0	10.2825	0
3/31/2018 3:40:00 PM.000	563.5	0.84	2.92	0.56	0.03816	10.2825	0.306036
3/31/2018 3:45:00 PM.000	543.3	0.83	2.6	0.67	0.08846	10.2825	0.676939
3/31/2018 3:50:00 PM.000	548.9	0.77	2.47	0.88	0.11087	10.2825	0.871014
3/31/2018 3:55:00 PM.000	577.1	0.9	2.24	1.1	0.13723	10.28	1.22912
3/31/2018 4:00:00 PM.000	618.8	1.28	1.75	1.28	0.1399	10.28	1.55031
3/31/2018 4:05:00 PM.000	1022.3	0.77	1.5	1.54	0.10354	10.28	0.958311
3/31/2018 4:10:00 PM.000	1204.9	0.68	1.3	1.74	0.07478	10.28	0.812702
3/31/2018 4:15:00 PM.000	1231.9	0	1.01	1.95	0.05655	10.28	0.129931
3/31/2018 4:20:00 PM.000	1216.9	-0.03	1.35	1.88	0.05433	10.28	0.0858468
3/31/2018 4:25:00 PM.000	1223.5	-0.03	2.17	1.68	0.05461	10.28	0.0862915
3/31/2018 4:30:00 PM.000	1085.1	-0.03	2.19	1.47	0.08611	10.28	0.136321
3/31/2018 4:35:00 PM.000	656.1	-0.03	2.47	1.35	0.10245	10.28	0.162273
3/31/2018 4:40:00 PM.000	557.1	-0.03	3.25	1.16	0.11186	10.28	0.177218
3/31/2018 4:45:00 PM.000	532.5	0.12	3.22	0.87	0.13822	10.28	0.219084
3/31/2018 4:50:00 PM.000	575.2	0.8	3.1	0.82	0.18459	10.28	1.24062
3/31/2018 4:55:00 PM.000	979.4	1.05	3.24	0.8	0.23171	10.28	2.0438
3/31/2018 5:00:00 PM.000	1188.6	1.12	2.71	0.9	0.27411	10.28	2.47637
3/31/2018 5:05:00 PM.000	1170.2	1.11	2.21	1.27	0.30479	10.28	2.6406
3/31/2018 5:10:00 PM.000	1181.8	0.98	2.11	1.44	0.32067	10.28	2.64806
3/31/2018 5:15:00 PM.000	950.8	0.78	1.87	1.68	0.31655	10.28	2.22126
3/31/2018 5:20:00 PM.000	621.2	1	1.39	1.85	0.27018	10.28	2.70502
3/31/2018 5:25:00 PM.000	553	1.34	1.14	2.04	0.23368	10.28	2.41859
3/31/2018 5:30:00 PM.000	541.3	0.37	0.96	2.17	0.20629	10.28	1.30567
3/31/2018 5:35:00 PM.000	540.6	-0.03	0.78	2.29	0.18684	10.28	0.296304
3/31/2018 5:40:00 PM.000	548.3	-0.03	0.93	2.13	0.19432	10.28	0.308184
3/31/2018 5:45:00 PM.000	533.3	-0.03	1.34	2.1	0.21527	10.28	0.341457
3/31/2018 5:50:00 PM.000	537.9	-0.03	1.36	2.03	0.20212	10.28	0.320572
3/31/2018 5:55:00 PM.000	767.3	-0.03	1.38	1.84	0.1975	10.275	0.313197
3/31/2018 6:00:00 PM.000	1305.6	-0.03	1.78	1.75	0.19663	10.2725	0.311797
3/31/2018 6:05:00 PM.000	1227.6	-0.03	2.15	1.63	0.19488	10.2725	0.309018
3/31/2018 6:10:00 PM.000	1199.5	-0.03	2.74	1.39	0.21659	10.275	0.343513
3/31/2018 6:15:00 PM.000	1180	-0.01	3.11	1.21	0.24908	10.275	0.395108
3/31/2018 6:20:00 PM.000	1159.4	0.32	3.46	1.02	0.31706	10.275	0.835748
3/31/2018 6:25:00 PM.000	852.9	0.58	3.74	0.9	0.36285	10.275	2.39784
3/31/2018 6:30:00 PM.000	572.8	1.11	3.06	0.94	0.40072	10.2725	3.27611
3/31/2018 6:35:00 PM.000	528.9	1.33	2.68	1.19	0.45871	10.2725	4.52162
3/31/2018 6:40:00 PM.000	530.7	1.44	2.71	1.36	0.48417	10.2725	4.42251
3/31/2018 6:45:00 PM.000	512.3	1.38	2.3	1.62	0.49977	10.2725	3.65651
3/31/2018 6:50:00 PM.000	511.3	0.69	1.65	1.87	0.53553	10.27	2.67141
3/31/2018 6:55:00 PM.000	518.3	0.57	1.61	2.22	0.50676	10.27	2.3504
3/31/2018 7:00:00 PM.000	526.7	0.02	1.57	2.26	0.47721	10.27	1.03613
3/31/2018 7:05:00 PM.000	746.1	-0.03	1.29	2.23	0.47414	10.2675	0.75238
3/31/2018 7:10:00 PM.000	1156.4	-0.03	1.31	2.1	0.4387	10.2675	0.69611
3/31/2018 7:15:00 PM.000	1246.7	-0.03	1.87	2.04	0.39625	10.2675	0.628709
3/31/2018 7:20:00 PM.000	1249.1	-0.03	2.37	1.78	0.37382	10.2675	0.593096
3/31/2018 7:25:00 PM.000	1233.5	-0.03	2.6	1.74	0.37952	10.265	0.60211
3/31/2018 7:30:00 PM.000	1226.3	-0.03	3.32	1.53	0.35404	10.2675	0.56169
3/31/2018 7:35:00 PM.000	1013.8	-0.01	3.87	1.41	0.37257	10.2625	0.591041
3/31/2018 7:40:00 PM.000	623.5	0.02	4.16	1.33	0.39345	10.2625	0.9994
3/31/2018 7:45:00 PM.000	527.7	0.13	4.63	1.13	0.38863	10.2625	2.14788
3/31/2018 7:50:00 PM.000	515.7	0.41	4.65	0.99	0.37442	10.2625	2.79652
3/31/2018 7:55:00 PM.000	519.3	0.87	4.48	0.99	0.36524	10.26	4.45911
3/31/2018 8:00:00 PM.000	533.3	1.41	4.68	1.1	0.34978	10.2625	4.71576
3/31/2018 8:05:00 PM.000	526.3	2.07	4.56	1.3	0.33476	10.265	3.92821
3/31/2018 8:10:00 PM.000	560.9	2.19	4.11	1.51	0.38766	10.265	3.75172
3/31/2018 8:15:00 PM.000	977.7	2.16	3.86	1.79	0.44693	10.2625	4.77658
3/31/2018 8:20:00 PM.000	1186.3	0.98	3.37	2.18	0.46103	10.2625	3.15504
3/31/2018 8:25:00 PM.000	1203	0.64	2.99	2.38	0.50981	10.2625	3.86429
3/31/2018 8:30:00 PM.000	1197.4	0.99	2.74	2.48	0.55345	10.2625	4.17275
3/31/2018 8:35:00 PM.000	1188.3	1.32	2.52	2.66	0.53255	10.2575	5.46053
3/31/2018 8:40:00 PM.000	1079.2	1.87	2.01	2.96	0.52568	10.2575	6.31873
3/31/2018 8:45:00 PM.000	553	1.38	1.63	3.28	0.50129	10.26	4.60543
3/31/2018 8:50:00 PM.000	546.8	0.56	1.4	3.57	0.4426	10.2575	2.35074
3/31/2018 8:55:00 PM.000	588.3	-0.02	1.15	3.7	0.38676	10.2575	0.143773
3/31/2018 9:00:00 PM.000	591.6	-0.03	1.06	3.68	0.36114	10.26	0.572861
3/31/2018 9:05:00 PM.000	582.5	-0.03	1.16	3.57	0.35648	10.26	0.565463
3/31/2018 9:10:00 PM.000	579.8	-0.03	1.55	3.37	0.33005	10.2575	0.523475
3/31/2018 9:15:00 PM.000	638.1	-0.03	1.69	3.18	0.33721	10.26	0.534872
3/31/2018 9:20:00 PM.000	1054.9	-0.03	1.85	2.98	0.33234	10.26	0.527141
3/31/2018 9:25:00 PM.000	1233.7	-0.03	2.27	2.84	0.31833	10.26	0.504901
3/31/2018 9:30:00 PM.000	1235.8	-0.03	2.83	2.65	0.30101	10.26	0.477406
3/31/2018 9:35:00 PM.000	1085	-0.03	3.18	2.46	0.28906	10.26	0.458435
3/31/2018 9:40:00 PM.000	688.3	-0.03	3.61	2.31	0.27702	10.26	0.439322
3/31/2018 9:45:00 PM.000	571	-0.03	4.11	2.1	0.27157	10.2575	0.430645
3/31/2018 9:50:00 PM.000	551.1	0.08	4.26	1.87	0.30331	10.2575	0.279701
3/31/2018 9:55:00 PM.000	567	0.22	4.44	1.71	0.31834	10.2575	2.47269
3/31/2018 10:00:00 PM.000	563.2	0.81	4.75	1.66	0.32189	10.2575	3.12574
3/31/2018 10:05:00 PM.000	558.8	1.58	4.53	1.66	0.39011	10.2575	3.58398
3/31/2018 10:10:00 PM.000	555.4	1.17	4.25	1.85	0.44348	10.255	3.21896
3/31/2018 10:15:00 PM.000	559.6	0.96	3.73	2.11	0.48733	10.255	3.73667
3/31/2018 10:20:00 PM.000	556.9	0.99	3.54	2.31	0.55813	10.255	4.18633
3/31/2018 10:25:00 PM.000	562	1.04	3.37	2.41	0.61138	10.255	4.51642
3/31/2018 10:30:00 PM.000	580.4	1.18	2.84	2.57	0.6512	10.255	5.1398
3/31/2018 10:35:00 PM.000	612.6	1	2.47	2.82	0.69765	10.255	4.41614
3/31/2018 10:40:00 PM.000	1027.2	0.83	2.27	3.07	0.72212	10.255	4.23643
3/31/2018 10:45:00 PM.000	1218.2	1.05	1.97	3.32	0.72166	10.255	5.76691
3/31/2018 10:50:00 PM.000	1212.9	2.03	1.53	3.48	0.70976	10.2575	7.8086
3/31/2018 10:55:00 PM.000	1219.5	1.01	1.25	3.68	0.65476	10.2575	4.09071
3/31/2018 11:00:00 PM.000	1205.1	0.01	1.11	3.93	0.58109	10.26	0.944703
3/31/2018 11:05:00 PM.000	764.7	-0.03	1	3.95	0.52726	10.2575	0.836523
3/31/2018 11:10:00 PM.000	209.9	-0.03	0.96	3.76	0.5188	10.2575	0.823094
3/31/2018 11:15:00 PM.000	85.3	-0.03	1.12	3.54	0.50653	10.255	0.803569
3/31/2018 11:20:00 PM.000	310.3	-0.03	1.35	3.38	0.4609	10.255	0.731141
3/31/2018 11:25:00 PM.000	528	-0.03	1.29	3.28	0.46693	10.2575	0.740756
3/31/2018 11:30:00 PM.000	575.4	-0.03	1.6	3.09	0.46144	10.25	0.731911
3/31/2018 11:35:00 PM.000	579.4	-0.03	1.97	2.99	0.41581	10.25	0.659492
3/31/2018 11:40:00 PM.000	603.7	-0.03	2	2.79	0.39802	10.25	0.631257
3/31/2018 11:45:00 PM.000	635.4	-0.03	2.27	2.66	0.40594	10.25	0.643827
3/31/2018 11:50:00 PM.000	1029.2	-0.03	2.66	2.48	0.38123	10.2475	0.604574
3/31/2018 11:55:00 PM.000	1249.8	-0.03	2.83	2.27	0.38603	10.2475	0.612191
4/1/2018 12:00:00 AM.000	1229.9	-0.03	3.32	2.11	0.37708	10.25	0.598023
4/1/2018 12:05:00 AM.000	1223.2	-0.03	3.89	1.98	0.36214	10.2525	0.574346
4/1/2018 12:10:00 AM.000	1231.4	0.04	4.22	1.75	0.36106	10.2525	0.572632
4/1/2018 12:15:00 AM.000	1129.5	0.59	4.57	1.74	0.38581	10.2525	2.16473
4/1/2018 12:20:00 AM.000	412.8	0.63	5.03	1.66	0.38817	10.255	3.79477
4/1/2018 12:25:00 AM.000	142.4	0.82	5.17	1.52	0.46514	10.255	4.40717
4/1/2018 12:30:00 AM.000	62.4	1.26	4.57	1.61	0.54771	10.2525	6.96306
4/1/2018 12:35:00 AM.000	310	1.8	4.12	1.82	0.59455	10.2525	7.65942
4/1/2018 12:40:00 AM.000	1010.3	1.71	3.96	2.04	0.65902	10.255	7.85925
4/1/2018 12:45:00 AM.000	1261.3	1.4	3.51	2.15	0.71527	10.255	9.72726
4/1/2018 12:50:00 AM.000	1274	1.22	2.94	2.46	0.74001	10.255	6.8581
4/1/2018 12:55:00 AM.000	1245.4	1.1	2.68	2.78	0.77562	10.255	5.72503
4/1/2018 1:00:00 AM.000	674.3	1.2	2.44	2.9	0.78851	10.255	8.23837
4/1/2018 1:05:00 AM.000	587.4	1.64	1.95	3.24	0.77956	10.255	10.6563
4/1/2018 1:10:00 AM.000	603.4	1.77	1.49	3.48	0.75463	10.255	8.21446
4/1/2018 1:15:00 AM.000	604.9	0.5	1.25	3.85	0.66237	10.255	3.48306
4/1/2018 1:20:00 AM.000	603.3	-0.03	1.15	3.99	0.62046	10.255	0.125221
4/1/2018 1:25:00 AM.000	605.5	-0.03	0.99	3.88	0.60396	10.2575	0.958276
4/1/2018 1:30:00 AM.000	607.7	-0.03	1.11	3.7	0.55478	10.255	0.880156
4/1/2018 1:35:00 AM.000	603.3	-0.03	1.58	3.51	0.51045	10.255	0.809791
4/1/2018 1:40:00 AM.000	601.8	-0.03	1.66	3.25	0.54235	10.2575	0.860477
4/1/2018 1:45:00 AM.000	608.4	-0.03	1.78	3.07	0.5193	10.2575	0.823888
4/1/2018 1:50:00 AM.000	607.7	-0.03	2.19	3	0.47031	10.2525	0.746033
4/1/2018 1:55:00 AM.000	615.2	-0.03	2.37	2.8	0.46511	10.255	0.737824
4/1/2018 2:00:00 AM.000	622.3	-0.03	2.51	2.56	0.45904	10.255	0.728189
4/1/2018 2:05:00 AM.000	614	-0.03	2.87	2.39	0.43415	10.255	0.688681
4/1/2018 2:10:00 AM.000	624.7	-0.03	3.14	2.17	0.46658	10.255	0.740157
4/1/2018 2:15:00 AM.000	627.3	-0.03	3.23	2.01	0.48915	10.255	0.775982
4/1/2018 2:20:00 AM.000	626	-0.03	3.63	1.75	0.52062	10.2575	0.825983
4/1/2018 2:25:00 AM.000	604.4	-0.02	3.95	1.61	0.58882	10.255	0.934187
4/1/2018 2:30:00 AM.000	596.9	0.2	4.09	1.51	0.67466	10.255	2.06549
4/1/2018 2:35:00 AM.000	602.2	0.56	4.14	1.43	0.7066	10.2575	5.59745
4/1/2018 2:40:00 AM.000	605.2	0.87	3.71	1.48	0.75512	10.2525	6.6518
4/1/2018 2:45:00 AM.000	599.7	1.3	3.41	1.57	0.81266	10.255	9.1874
4/1/2018 2:50:00 AM.000	595.6	1.88	3.15	1.63	0.83629	10.255	8.98591
4/1/2018 2:55:00 AM.000	599.7	1.35	2.71	1.78	0.85896	10.255	6.97759
4/1/2018 3:00:00 AM.000	606.1	0.39	2.3	2.19	0.87384	10.255	3.48244
4/1/2018 3:05:00 AM.000	595.2	0.67	2.11	2.32	0.82444	10.255	3.6029
4/1/2018 3:10:00 AM.000	594	0.77	1.93	2.36	0.79627	10.255	5.2666
4/1/2018 3:15:00 AM.000	602.3	1.02	1.48	2.55	0.75804	10.2525	7.6054
4/1/2018 3:20:00 AM.000	599.2	1.73	1.16	2.82	0.69493	10.255	7.96567
4/1/2018 3:25:00 AM.000	620.8	0.67	0.88	3.01	0.64839	10.255	5.38794
4/1/2018 3:30:00 AM.000	620.6	-0.02	0.78	3.19	0.60644	10.2575	0.370542
4/1/2018 3:35:00 AM.000	613.8	-0.03	0.72	3.12	0.57577	10.2575	0.913528
4/1/2018 3:40:00 AM.000	598.3	-0.03	1.1	2.99	0.52806	10.2575	0.837793
4/1/2018 3:45:00 AM.000	582.1	-0.03	1.29	2.75	0.51253	10.255	0.813093
4/1/2018 3:50:00 AM.000	580.1	-0.03	1.3	2.53	0.49658	10.255	0.787776
4/1/2018 3:55:00 AM.000	585.4	-0.03	1.64	2.4	0.46462	10.2575	0.73709
4/1/2018 4:00:00 AM.000	582.9	-0.03	1.93	2.25	0.46121	10.2575	0.731677
4/1/2018 4:05:00 AM.000	571.6	-0.03	2.03	2.07	0.4782	10.2575	0.758646
4/1/2018 4:10:00 AM.000	579.9	-0.03	2.31	1.91	0.47597	10.26	0.755151
4/1/2018 4:15:00 AM.000	611.7	-0.03	2.57	1.72	0.47105	10.2575	0.747296
4/1/2018 4:20:00 AM.000	591.5	-0.03	2.8	1.61	0.51238	10.2575	0.812903
4/1/2018 4:25:00 AM.000	599.2	-0.03	3.09	1.42	0.56917	10.2575	0.903051
4/1/2018 4:30:00 AM.000	606.7	0.14	3.36	1.22	0.6388	10.2575	0.628974
4/1/2018 4:35:00 AM.000	607.5	0.49	3.47	0.99	0.69684	10.255	5.46509
4/1/2018 4:40:00 AM.000	599.8	0.84	3.17	1	0.73411	10.255	7.02683
4/1/2018 4:45:00 AM.000	586.5	1.05	2.75	1.06	0.77646	10.255	7.39674
4/1/2018 4:50:00 AM.000	572.2	1.34	2.63	1.23	0.8157	10.255	8.2236
4/1/2018 4:55:00 AM.000	566.3	1.31	2.29	1.48	0.81696	10.2575	7.61146
4/1/2018 5:00:00 AM.000	576.9	0.96	1.74	1.67	0.82308	10.2575	6.15858
4/1/2018 5:05:00 AM.000	574.1	1.14	1.51	1.92	0.78922	10.2575	5.67518
4/1/2018 5:10:00 AM.000	587.1	0.49	1.28	2.18	0.7314	10.26	4.99196
4/1/2018 5:15:00 AM.000	591	-0.02	1.07	2.26	0.70989	10.2575	1.12643
4/1/2018 5:20:00 AM.000	583.9	-0.03	0.96	2.31	0.67701	10.2625	1.07436
4/1/2018 5:25:00 AM.000	574.7	-0.03	1.19	2.21	0.66136	10.26	1.04945
4/1/2018 5:30:00 AM.000	576.2	-0.03	1.47	2.06	0.63775	10.26	1.01197
4/1/2018 5:35:00 AM.000	571.7	-0.03	1.54	1.88	0.63041	10.26	1.00032
4/1/2018 5:40:00 AM.000	584.7	-0.03	1.8	1.72	0.58364	10.2575	0.92602
4/1/2018 5:45:00 AM.000	570.5	-0.03	2.08	1.41	0.5449	10.2575	0.864525
4/1/2018 5:50:00 AM.000	570.6	-0.03	2.25	1.24	0.54073	10.255	0.857855
4/1/2018 5:55:00 AM.000	584.5	-0.02	2.46	1.06	0.5331	10.2575	0.845794
4/1/2018 6:00:00 AM.000	592.4	0.14	2.76	0.93	0.54121	10.2575	1.71325
4/1/2018 6:05:00 AM.000	566.1	0.67	2.81	0.78	0.5595	10.255	5.12213
4/1/2018 6:10:00 AM.000	572.4	1.26	2.68	0.81	0.63094	10.255	6.78939
4/1/2018 6:15:00 AM.000	566.5	1.62	2.4	0.98	0.68059	10.255	5.96032
4/1/2018 6:20:00 AM.000	577.5	0.77	1.86	1.16	0.72187	10.255	4.9084
4/1/2018 6:25:00 AM.000	574.7	0.6	1.72	1.43	0.77543	10.255	3.76119
4/1/2018 6:30:00 AM.000	565.1	0.65	1.53	1.58	0.79567	10.255	4.41776
4/1/2018 6:35:00 AM.000	553.8	0.69	1.14	1.68	0.79922	10.255	5.41924
4/1/2018 6:40:00 AM.000	566.8	0.62	0.85	1.85	0.78291	10.255	5.4797
4/1/2018 6:45:00 AM.000	560.1	0.04	0.75	2.03	0.73101	10.255	3.22259
4/1/2018 6:50:00 AM.000	566.8	-0.03	0.72	2.03	0.67868	10.2525	1.07676
4/1/2018 6:55:00 AM.000	585.9	-0.03	0.63	1.89	0.65561	10.2525	1.04014
4/1/2018 7:00:00 AM.000	589.8	-0.03	0.89	1.77	0.61926	10.2525	0.982446
4/1/2018 7:05:00 AM.000	574.7	-0.03	1.2	1.61	0.57989	10.2525	0.919958
4/1/2018 7:10:00 AM.000	564.7	-0.03	1.21	1.43	0.5832	10.25	0.925157
4/1/2018 7:15:00 AM.000	518.5	-0.03	1.41	1.36	0.56901	10.2525	0.90269
4/1/2018 7:20:00 AM.000	222.4	-0.03	1.84	1.11	0.55428	10.2525	0.87931
4/1/2018 7:25:00 AM.000	110.3	-0.03	1.92	0.89	0.55242	10.25	0.876306
4/1/2018 7:30:00 AM.000	392.9	0.51	1.88	0.78	0.59381	10.2475	0.636834
4/1/2018 7:35:00 AM.000	587.4	1.33	1.88	0.67	0.64268	10.25	5.31629
4/1/2018 7:40:00 AM.000	622.9	1.14	1.71	0.81	0.69499	10.25	6.54922
4/1/2018 7:45:00 AM.000	616.6	1.29	1.1	0.93	0.73567	10.25	7.14741
4/1/2018 7:50:00 AM.000	611.2	1	0.91	1.14	0.76723	10.2475	5.93136
4/1/2018 7:55:00 AM.000	608.6	0.63	0.8	1.35	0.78615	10.2475	3.69945
4/1/2018 8:00:00 AM.000	611	0.11	0.49	1.55	0.75575	10.2475	3.00858
4/1/2018 8:05:00 AM.000	618.2	-0.03	0.41	1.68	0.72251	10.2475	1.14619
4/1/2018 8:10:00 AM.000	611.4	-0.03	0.48	1.63	0.69049	10.2475	1.09537
4/1/2018 8:15:00 AM.000	557.9	-0.03	0.44	1.39	0.64737	10.2425	1.02682
4/1/2018 8:20:00 AM.000	232.3	-0.03	0.38	1.25	0.61983	10.24	0.983059
4/1/2018 8:25:00 AM.000	102.5	-0.03	0.75	1.19	0.59372	10.24	0.94163
4/1/2018 8:30:00 AM.000	338.4	-0.03	0.76	0.81	0.56317	10.24	0.893155
4/1/2018 8:35:00 AM.000	568.5	-0.03	0.62	0.67	0.54889	10.24	0.870497
4/1/2018 8:40:00 AM.000	611.8	0.02	1.02	0.68	0.51626	10.24	0.818722
4/1/2018 8:45:00 AM.000	609.9	0.62	1.27	0.44	0.49812	10.2425	2.21185
4/1/2018 8:50:00 AM.000	602.2	1	0.98	0.5	0.4815	10.2425	3.87976
4/1/2018 8:55:00 AM.000	608.7	0.7	0.94	0.71	0.47472	10.2425	3.9799
4/1/2018 9:00:00 AM.000	597.2	0.75	1.17	0.86	0.55022	10.245	4.06007
4/1/2018 9:05:00 AM.000	588.9	0.95	0.97	0.88	0.60119	10.245	4.82099
4/1/2018 9:10:00 AM.000	606.5	1.37	0.43	1.02	0.62396	10.2425	6.06729
4/1/2018 9:15:00 AM.000	616	1	0.31	1.3	0.67928	10.2425	5.61563
4/1/2018 9:20:00 AM.000	628.8	0.54	0.28	1.41	0.68226	10.245	3.07327
4/1/2018 9:25:00 AM.000	620.9	0.42	0.09	1.68	0.65362	10.245	3.14039
4/1/2018 9:30:00 AM.000	362	-0.02	0.07	1.85	0.63399	10.2475	1.37188
4/1/2018 9:35:00 AM.000	194.3	-0.03	0.08	1.8	0.59013	10.245	0.936045
4/1/2018 9:40:00 AM.000	463.2	-0.03	0.07	1.74	0.53944	10.245	0.855604
4/1/2018 9:45:00 AM.000	582.5	-0.03	0.07	1.65	0.50632	10.2475	0.803093
4/1/2018 9:50:00 AM.000	598.6	-0.03	0.09	1.64	0.4709	10.2475	0.746881
4/1/2018 9:55:00 AM.000	607.4	-0.03	0.13	1.46	0.45987	10.2475	0.729376
4/1/2018 10:00:00 AM.000	615.6	-0.03	0.11	1.21	0.45028	10.2475	0.714157
4/1/2018 10:05:00 AM.000	613.6	-0.03	0.34	1.1	0.43002	10.2475	0.682004
4/1/2018 10:10:00 AM.000	605.9	-0.03	0.61	0.89	0.42978	10.25	0.681664
4/1/2018 10:15:00 AM.000	606.3	-0.02	0.66	0.52	0.48821	10.2475	0.774352
4/1/2018 10:20:00 AM.000	604.9	0.12	0.86	0.38	0.54669	10.2475	0.805606
4/1/2018 10:25:00 AM.000	601.7	0.21	1.07	0.4	0.56617	10.25	3.01048
4/1/2018 10:30:00 AM.000	626.6	0.71	0.71	0.36	0.59755	10.25	4.19826
4/1/2018 10:35:00 AM.000	622.8	0.86	0.51	0.4	0.61015	10.25	5.42345
4/1/2018 10:40:00 AM.000	614	1.13	0.54	0.49	0.56274	10.2475	4.50768
4/1/2018 10:45:00 AM.000	604.4	0.86	0.29	0.76	0.51253	10.25	3.06488
4/1/2018 10:50:00 AM.000	602.1	0.02	0.09	0.99	0.48895	10.25	1.36382
4/1/2018 10:55:00 AM.000	612.1	-0.03	0.11	1	0.42515	10.25	0.674315
4/1/2018 11:00:00 AM.000	611.7	-0.03	0.29	0.88	0.3896	10.2525	0.61793
4/1/2018 11:05:00 AM.000	594	-0.03	0.39	0.65	0.38996	10.2525	0.618502
4/1/2018 11:10:00 AM.000	598	-0.03	0.54	0.46	0.40513	10.2525	0.64258
4/1/2018 11:15:00 AM.000	596.8	-0.03	0.73	0.36	0.40172	10.2525	0.637167
4/1/2018 11:20:00 AM.000	593.2	0.04	0.97	0.37	0.39528	10.255	0.233021
4/1/2018 11:25:00 AM.000	584.7	0.65	1.07	0.3	0.45716	10.255	3.23221
4/1/2018 11:30:00 AM.000	587.7	1.5	0.96	0.32	0.47751	10.2575	5.00006
4/1/2018 11:35:00 AM.000	597.4	1.12	0.58	0.54	0.4992	10.2575	3.79596
4/1/2018 11:40:00 AM.000	620	0.39	0.47	0.95	0.53168	10.2575	2.46682
4/1/2018 11:45:00 AM.000	626.7	0.43	0.4	0.94	0.47509	10.2575	2.50015
4/1/2018 11:50:00 AM.000	614.1	0.44	0.19	1.02	0.43562	10.26	1.89355
4/1/2018 11:55:00 AM.000	615	-0.02	0.1	1.14	0.41214	10.2625	0.666919
4/1/2018 12:00:00 PM.000	785.4	-0.03	0.1	1.21	0.33291	10.265	0.528109
4/1/2018 12:05:00 PM.000	1172	-0.03	0.3	0.99	0.31935	10.265	0.50658
4/1/2018 12:10:00 PM.000	1239.7	-0.03	0.56	0.77	0.32208	10.2675	0.510945
4/1/2018 12:15:00 PM.000	1251.1	-0.03	0.82	0.62	0.29278	10.2675	0.464423
4/1/2018 12:20:00 PM.000	923.4	-0.03	1.29	0.49	0.2589	10.27	0.410654
4/1/2018 12:25:00 PM.000	635.4	0.18	1.71	0.46	0.24819	10.2725	0.302734
4/1/2018 12:30:00 PM.000	589.6	0.44	1.83	0.42	0.29902	10.2725	2.11998
4/1/2018 12:35:00 PM.000	579.8	0.58	1.8	0.46	0.33472	10.275	2.88879
4/1/2018 12:40:00 PM.000	581.2	1.05	1.44	0.55	0.34848	10.275	3.37386
4/1/2018 12:45:00 PM.000	571.3	1.49	1.27	0.73	0.40687	10.275	3.99632
4/1/2018 12:50:00 PM.000	568	1.03	0.97	0.89	0.34921	10.2775	2.55005
4/1/2018 12:55:00 PM.000	575.7	0.33	0.73	1.08	0.30785	10.2825	1.56925
4/1/2018 1:00:00 PM.000	580	-0.02	0.59	1.21	0.30874	10.2825	0.697365
4/1/2018 1:05:00 PM.000	573.5	-0.03	0.63	1.06	0.23351	10.2825	0.370449
4/1/2018 1:10:00 PM.000	583.7	-0.03	0.78	0.89	0.20492	10.2825	0.325038
4/1/2018 1:15:00 PM.000	760.1	-0.03	0.95	0.81	0.19615	10.285	0.311127
4/1/2018 1:20:00 PM.000	1166.6	-0.03	1.14	0.67	0.18985	10.2875	0.301138
4/1/2018 1:25:00 PM.000	1271.8	-0.03	1.39	0.52	0.15087	10.29	0.239232
4/1/2018 1:30:00 PM.000	1257.9	0.06	2	0.4	0.14025	10.29	0.121491
4/1/2018 1:35:00 PM.000	1245.2	0.55	2.27	0.43	0.1982	10.29	1.14037
4/1/2018 1:40:00 PM.000	1206.8	0.25	2.31	0.42	0.21772	10.295	1.18146
4/1/2018 1:45:00 PM.000	1180.4	0.4	2.03	0.52	0.21635	10.295	1.56836
4/1/2018 1:50:00 PM.000	1006.5	0.53	1.83	0.53	0.27037	10.295	2.3043
4/1/2018 1:55:00 PM.000	634.4	0.79	1.73	0.6	0.19301	10.295	1.89666
4/1/2018 2:00:00 PM.000	586	1.18	1.45	0.87	0.10163	10.2975	1.00726
4/1/2018 2:05:00 PM.000	567.6	1.06	0.97	1.12	0.11169	10.2975	1.08967
4/1/2018 2:10:00 PM.000	568.5	0.54	0.79	1.27	0.06524	10.3	0.640277
4/1/2018 2:15:00 PM.000	716.2	-0.01	0.71	1.37	0	10.3	0
4/1/2018 2:20:00 PM.000	1126.6	-0.03	0.77	1.36	0.01161	10.3025	0.0180074
4/1/2018 2:25:00 PM.000	1248.6	-0.03	1.13	1.21	0.03095	10.3075	0.048746
4/1/2018 2:30:00 PM.000	1258.3	-0.03	1.58	1.01	0	10.3075	-0.000441856
4/1/2018 2:35:00 PM.000	1254.7	-0.03	1.81	0.78	0	10.3075	-0.000441856
4/1/2018 2:40:00 PM.000	1241.1	-0.01	2.23	0.7	0.02114	10.3075	0.0130846
4/1/2018 2:45:00 PM.000	1190.1	0.13	2.76	0.51	0.05114	10.31	0.250452
4/1/2018 2:50:00 PM.000	1182.4	0.43	2.86	0.4	0.08524	10.31	0.537908
4/1/2018 2:55:00 PM.000	1201.7	0.6	2.33	0.59	0.13922	10.31	0.946831
4/1/2018 3:00:00 PM.000	1137.7	0.59	2.18	0.59	0.16511	10.3125	1.47131
4/1/2018 3:05:00 PM.000	692.2	1.28	2.19	0.63	0.13586	10.3125	1.53426
4/1/2018 3:10:00 PM.000	566	1.42	1.75	0.89	0.13353	10.3125	1.2968
4/1/2018 3:15:00 PM.000	556.3	0.86	1.18	1.23	0.11075	10.315	1.03128
4/1/2018 3:20:00 PM.000	556	0.65	1.11	1.47	0.04601	10.3175	0.46358
4/1/2018 3:25:00 PM.000	556.3	0.11	0.99	1.56	0.02893	10.3225	0.165557
4/1/2018 3:30:00 PM.000	549.5	-0.03	0.82	1.53	0.04539	10.3225	0.0717208
4/1/2018 3:35:00 PM.000	634.1	-0.03	1.13	1.38	0.0179	10.3225	0.0280162
4/1/2018 3:40:00 PM.000	1071.3	-0.03	1.42	1.11	0	10.3225	-0.000441816
4/1/2018 3:45:00 PM.000	1215	-0.03	1.42	1.02	0	10.3225	-0.000441816
4/1/2018 3:50:00 PM.000	1232.8	-0.03	1.95	0.96	0	10.3275	-0.000441803
4/1/2018 3:55:00 PM.000	1221.1	-0.01	2.54	0.75	0	10.3275	0
4/1/2018 4:00:00 PM.000	1253.4	0.19	2.59	0.61	0.07143	10.3275	0.378019
4/1/2018 4:05:00 PM.000	1178.4	0.66	2.78	0.56	0.12504	10.3275	0.967089
4/1/2018 4:10:00 PM.000	1131.9	0.69	2.37	0.6	0.16946	10.3275	1.15259
4/1/2018 4:15:00 PM.000	659.8	0.46	2.06	0.78	0.22438	10.3275	1.65162
4/1/2018 4:20:00 PM.000	585.1	0.71	2.02	1.01	0.26764	10.3275	2.51484
4/1/2018 4:25:00 PM.000	593.6	1.41	1.78	1.09	0.26067	10.335	2.74
4/1/2018 4:30:00 PM.000	605.8	1.54	1.24	1.27	0.22167	10.335	2.06264
4/1/2018 4:35:00 PM.000	608.1	1.05	0.95	1.54	0.23461	10.335	2.47437
4/1/2018 4:40:00 PM.000	886.3	0.4	0.82	1.7	0.2168	10.3375	2.11865
4/1/2018 4:45:00 PM.000	1222.9	-0.03	0.68	1.82	0.26007	10.3375	0.413174
4/1/2018 4:50:00 PM.000	1265.6	-0.03	1.05	1.88	0.33318	10.3375	0.529448
4/1/2018 4:55:00 PM.000	1255.2	-0.03	1.7	1.68	0.37434	10.34	0.594944
4/1/2018 5:00:00 PM.000	1224.3	-0.03	1.8	1.44	0.39746	10.34	0.631717
4/1/2018 5:05:00 PM.000	785.8	-0.03	2.21	1.32	0.50038	10.34	0.79541
4/1/2018 5:10:00 PM.000	582.8	-0.03	2.98	1.14	0.50793	10.34	0.807419
4/1/2018 5:15:00 PM.000	562.4	0.08	2.93	0.9	0.50041	10.34	0.795458
4/1/2018 5:20:00 PM.000	568.5	0.75	2.99	0.87	0.49159	10.34	3.01436
4/1/2018 5:25:00 PM.000	571.4	1.16	3.36	0.89	0.46901	10.3425	4.19699
4/1/2018 5:30:00 PM.000	572.5	1.51	3.14	0.98	0.4923	10.34	3.83229
4/1/2018 5:35:00 PM.000	573.9	0.89	2.75	1.14	0.54513	10.3425	3.78986
4/1/2018 5:40:00 PM.000	566.6	0.92	2.62	1.37	0.59727	10.3425	4.18938
4/1/2018 5:45:00 PM.000	559.5	0.89	2.3	1.47	0.65611	10.3425	4.44311
4/1/2018 5:50:00 PM.000	839.6	0.84	1.9	1.7	0.69844	10.3425	4.59804
4/1/2018 5:55:00 PM.000	1167.4	0.76	1.73	1.96	0.7313	10.3425	4.18155
4/1/2018 6:00:00 PM.000	1216.6	0.73	1.44	1.99	0.75241	10.3425	4.48082
4/1/2018 6:05:00 PM.000	1215.2	0.7	1.12	2.14	0.7725	10.3425	4.91913
4/1/2018 6:10:00 PM.000	1215	0.15	0.88	2.42	0.80759	10.3425	4.34156
4/1/2018 6:15:00 PM.000	1230.2	-0.03	0.86	2.54	0.77325	10.345	1.22955
4/1/2018 6:20:00 PM.000	1211.9	-0.03	0.82	2.35	0.70235	10.3425	1.11671
4/1/2018 6:25:00 PM.000	1049.2	-0.03	0.81	2.25	0.66791	10.3425	1.06193
4/1/2018 6:30:00 PM.000	625.6	-0.03	1.27	2.1	0.66006	10.345	1.04951
4/1/2018 6:35:00 PM.000	608.2	-0.03	1.88	1.93	0.61876	10.3425	0.983752
4/1/2018 6:40:00 PM.000	611.5	-0.03	1.71	1.75	0.62283	10.3425	0.990225
4/1/2018 6:45:00 PM.000	598.6	-0.03	2.03	1.64	0.63386	10.3425	1.00777
4/1/2018 6:50:00 PM.000	594.4	-0.03	2.64	1.5	0.62483	10.3425	0.993406
4/1/2018 6:55:00 PM.000	615.2	-0.01	2.69	1.3	0.63089	10.3425	1.00305
4/1/2018 7:00:00 PM.000	628.6	0.17	2.85	1.15	0.64591	10.3425	1.76407
4/1/2018 7:05:00 PM.000	615.9	0.53	3.29	1.09	0.65217	10.3425	5.71835
4/1/2018 7:10:00 PM.000	616.9	1.03	3.2	1.09	0.67841	10.3375	6.40144
4/1/2018 7:15:00 PM.000	616.4	1.31	2.83	1.22	0.67574	10.3375	5.24169
4/1/2018 7:20:00 PM.000	618.2	0.67	3.02	1.38	0.66986	10.3375	4.77332
4/1/2018 7:25:00 PM.000	618	0.69	3.11	1.48	0.75283	10.3375	5.39247
4/1/2018 7:30:00 PM.000	897.4	0.74	2.79	1.58	0.80976	10.335	7.76202
4/1/2018 7:35:00 PM.000	1288.7	1.07	2.36	1.8	0.8464	10.335	7.41237
4/1/2018 7:40:00 PM.000	1323.1	1.23	2.15	2.07	0.9035	10.3375	7.52702
4/1/2018 7:45:00 PM.000	1314.4	1.68	1.81	2.21	0.94643	10.3375	11.1273
4/1/2018 7:50:00 PM.000	1305	1.93	1.39	2.51	0.95854	10.335	10.5663
4/1/2018 7:55:00 PM.000	1193.6	0.7	1	2.81	0.97485	10.3375	4.78345
4/1/2018 8:00:00 PM.000	697.8	-0.01	0.89	3.16	0.9504	10.34	1.71938
4/1/2018 8:05:00 PM.000	634.3	-0.03	0.83	3.07	0.88613	10.3325	1.40869
4/1/2018 8:10:00 PM.000	628.9	-0.03	0.73	2.93	0.85221	10.335	1.35483
4/1/2018 8:15:00 PM.000	639.4	-0.03	0.77	2.81	0.80976	10.335	1.28733
4/1/2018 8:20:00 PM.000	641.1	-0.03	0.89	2.63	0.79248	10.335	1.25984
4/1/2018 8:25:00 PM.000	633.2	-0.03	1.3	2.46	0.76699	10.335	1.21931
4/1/2018 8:30:00 PM.000	633.9	-0.03	1.49	2.3	0.75573	10.3325	1.20133
4/1/2018 8:35:00 PM.000	645.3	-0.03	1.7	2.06	0.73714	10.3325	1.17177
4/1/2018 8:40:00 PM.000	651.6	-0.03	2.04	1.98	0.72432	10.3325	1.15138
4/1/2018 8:45:00 PM.000	642.8	-0.03	2.36	1.88	0.70392	10.3325	1.11894
4/1/2018 8:50:00 PM.000	738.3	-0.03	2.64	1.68	0.70196	10.3325	1.11582
4/1/2018 8:55:00 PM.000	1215	-0.03	2.93	1.46	0.69893	10.33	1.11094
4/1/2018 9:00:00 PM.000	1334.5	-0.01	3.4	1.39	0.7027	10.33	1.11693
4/1/2018 9:05:00 PM.000	1265	0.13	4	1.19	0.7048	10.335	2.76367
4/1/2018 9:10:00 PM.000	1312	0.64	4.34	0.95	0.69137	10.33	6.31056
4/1/2018 9:15:00 PM.000	950.6	1	4.4	0.86	0.67562	10.33	6.07611
4/1/2018 9:20:00 PM.000	658.9	1.12	4.8	1.04	0.71421	10.335	5.56224
4/1/2018 9:25:00 PM.000	637.6	0.81	4.86	1.24	0.77934	10.3325	6.55536
4/1/2018 9:30:00 PM.000	637.7	1.03	4.1	1.54	0.83573	10.335	9.6896
4/1/2018 9:35:00 PM.000	628.4	1.31	3.68	1.75	0.90298	10.335	10.946
4/1/2018 9:40:00 PM.000	629.3	1.13	3.78	1.95	0.95945	10.3325	9.53816
4/1/2018 9:45:00 PM.000	613.9	1.16	3.31	2.09	0.99982	10.3325	9.63173
4/1/2018 9:50:00 PM.000	615.2	1.23	2.56	2.32	1.04576	10.3325	11.9377
4/1/2018 9:55:00 PM.000	627.1	1.76	2.47	2.62	1.07027	10.33	14.7323
4/1/2018 10:00:00 PM.000	639.7	1.99	2.22	2.92	1.06597	10.3275	11.9702
4/1/2018 10:05:00 PM.000	611.8	0.94	1.55	3.14	1.07202	10.3325	5.12326
4/1/2018 10:10:00 PM.000	617.5	0.56	1.25	3.39	1.03783	10.3275	4.24025
4/1/2018 10:15:00 PM.000	705.6	0.02	1.25	3.6	0.96779	10.3275	2.81144
4/1/2018 10:20:00 PM.000	1196.4	-0.03	1.12	3.54	0.92843	10.3275	1.47578
4/1/2018 10:25:00 PM.000	1375.5	-0.03	0.95	3.47	0.86022	10.3275	1.36733
4/1/2018 10:30:00 PM.000	1281.7	-0.03	1.09	3.3	0.8167	10.3275	1.29813
[truncated: 80,649 more rows]

## Sheet: Reactor 3 Compartment 1
Time	Influent flowrate (m3/h)	DO (g O2/m3)	NH4 (g N/m3)	NO3 (g N/m3)	N2O (g N/m3)	Temperature (°C)	N2O emission rate (g N/m3/d)
3/26/2018 12:00:00 AM.000	1236.6	1.1	1.75	0.7	0.04193	11.035	0.607925
3/26/2018 12:05:00 AM.000	933.5	1.57	1.5	0.86	0.07564	11.035	1.00243
3/26/2018 12:10:00 AM.000	707.7	1.04	0.92	0.88	0.07768	11.04	0.587331
3/26/2018 12:15:00 AM.000	672.4	0.19	0.77	1.04	0.08776	11.04	0.341066
3/26/2018 12:20:00 AM.000	645.2	0.05	0.62	1.34	0.16302	11.04	0.0505473
3/26/2018 12:25:00 AM.000	656.9	0.04	0.35	1.53	0.19019	11.0425	0.307138
3/26/2018 12:30:00 AM.000	657.3	0.04	0.34	1.33	0.188	11.045	0.303615
3/26/2018 12:35:00 AM.000	655.9	0.04	0.6	1.09	0.17189	11.0425	0.277543
3/26/2018 12:40:00 AM.000	643.4	0.04	0.85	0.84	0.00441	11.045	0.00669243
3/26/2018 12:45:00 AM.000	647.1	0.06	0.94	0.95	0	11.045	-0.000439916
3/26/2018 12:50:00 AM.000	645.3	0.57	1.16	0.87	0	11.045	0
3/26/2018 12:55:00 AM.000	671.7	1.01	1.37	0.83	0	11.0475	0
3/26/2018 1:00:00 AM.000	1033.8	1.11	1.48	0.78	0	11.05	0
3/26/2018 1:05:00 AM.000	1246.6	0.81	1.47	0.83	0.00376	11.05	0.0368269
3/26/2018 1:10:00 AM.000	1248.1	0.76	1.43	0.91	0.02329	11.05	0.172021
3/26/2018 1:15:00 AM.000	1268.5	0.69	1.25	0.88	0.04705	11.05	0.322301
3/26/2018 1:20:00 AM.000	1120.9	0.98	0.89	1.2	0.06236	11.0525	0.603398
3/26/2018 1:25:00 AM.000	738.1	1.48	0.66	1.39	0.06706	11.0575	0.530355
3/26/2018 1:30:00 AM.000	645.8	0.25	0.59	1.6	0.09952	11.0575	0.335446
3/26/2018 1:35:00 AM.000	636.9	0.05	0.36	1.63	0.15062	11.0575	0.243232
3/26/2018 1:40:00 AM.000	658.2	0.04	0.18	1.57	0.15826	11.0575	0.255592
3/26/2018 1:45:00 AM.000	643.4	0.04	0.25	1.43	0.17667	11.0575	0.285375
3/26/2018 1:50:00 AM.000	634.1	0.04	0.54	1.11	0.12244	11.0575	0.197643
3/26/2018 1:55:00 AM.000	652.6	0.04	0.67	0.99	0.00055	11.0575	0.000449901
3/26/2018 2:00:00 AM.000	653.9	0.17	0.8	0.93	0	11.06	0
3/26/2018 2:05:00 AM.000	652.2	0.38	1.09	0.78	0	11.06	0
3/26/2018 2:10:00 AM.000	686.4	0.55	1.27	0.68	0	11.0625	0
3/26/2018 2:15:00 AM.000	1105.8	0.94	1.28	0.5	0.0006	11.0625	0.00659433
3/26/2018 2:20:00 AM.000	1276.8	1.02	1.36	0.72	0.00793	11.0625	0.0855441
3/26/2018 2:25:00 AM.000	1214.9	1.32	1.29	0.87	0.02331	11.065	0.318356
3/26/2018 2:30:00 AM.000	832.8	1.26	0.83	0.92	0.03722	11.065	0.427264
3/26/2018 2:35:00 AM.000	698.6	0.62	0.52	1.15	0.03174	11.065	0.148246
3/26/2018 2:40:00 AM.000	666.1	0.08	0.44	1.04	0.08501	11.065	0.132059
3/26/2018 2:45:00 AM.000	650.9	0.05	0.27	1.42	0.13348	11.07	0.215567
3/26/2018 2:50:00 AM.000	645.7	0.04	0.17	1.25	0.1133	11.0725	0.182921
3/26/2018 2:55:00 AM.000	651.8	0.04	0.27	1.25	0.10676	11.0725	0.172337
3/26/2018 3:00:00 AM.000	652.6	0.04	0.54	0.79	0.00763	11.0725	0.0119083
3/26/2018 3:05:00 AM.000	626.8	0.04	0.69	0.69	0	11.0725	-0.000439845
3/26/2018 3:10:00 AM.000	656.3	0.22	0.8	0.62	0	11.0725	0
3/26/2018 3:15:00 AM.000	672.7	0.72	1.09	0.67	0	11.0725	0
3/26/2018 3:20:00 AM.000	662.1	0.64	1.27	0.47	0	11.075	0
3/26/2018 3:25:00 AM.000	664.9	0.64	1.29	0.79	0.00067	11.0775	0.00610866
3/26/2018 3:30:00 AM.000	689.7	0.9	1.33	0.98	0.01426	11.0775	0.134048
3/26/2018 3:35:00 AM.000	679.6	0.81	1.33	1.37	0.03187	11.0775	0.294426
3/26/2018 3:40:00 AM.000	674.7	1.2	1.01	1.2	0.04762	11.08	0.617835
3/26/2018 3:45:00 AM.000	658.7	1.53	0.61	1.23	0.04768	11.08	0.558801
3/26/2018 3:50:00 AM.000	646.5	0.43	0.57	1.46	0.06668	11.08	0.353474
3/26/2018 3:55:00 AM.000	649.5	0.06	0.36	1.68	0.12551	11.08	0.202718
3/26/2018 4:00:00 AM.000	654.4	0.05	0.15	1.59	0.12897	11.08	0.208318
3/26/2018 4:05:00 AM.000	651.6	0.04	0.17	1.16	0.1279	11.08	0.206586
3/26/2018 4:10:00 AM.000	654.7	0.04	0.35	0.97	0.10697	11.0825	0.172718
3/26/2018 4:15:00 AM.000	673.2	0.04	0.56	0.98	0.00019	11.0825	-0.000132257
3/26/2018 4:20:00 AM.000	661.5	0.06	0.65	0.88	0	11.085	-0.000439813
3/26/2018 4:25:00 AM.000	660.6	0.37	0.84	0.79	0	11.085	0
3/26/2018 4:30:00 AM.000	656.6	0.77	1.08	1.01	0	11.085	0
3/26/2018 4:35:00 AM.000	656.7	0.84	1.19	0.88	0.00022	11.085	0.00185278
3/26/2018 4:40:00 AM.000	651	0.96	1.19	1.11	0.00817	11.085	0.0975462
3/26/2018 4:45:00 AM.000	648.4	1.58	0.91	0.91	0.02227	11.0875	0.263192
3/26/2018 4:50:00 AM.000	654.9	0.89	0.61	1.17	0.01888	11.09	0.118815
3/26/2018 4:55:00 AM.000	674.1	0.1	0.44	1.1	0.05868	11.09	0.156291
3/26/2018 5:00:00 AM.000	673.6	0.05	0.28	1.2	0.1086	11.09	0.175388
3/26/2018 5:05:00 AM.000	639.4	0.04	0.16	1.26	0.10294	11.09	0.166224
3/26/2018 5:10:00 AM.000	638.4	0.04	0.19	1.09	0.04111	11.09	0.0661189
3/26/2018 5:15:00 AM.000	638.3	0.04	0.42	1.03	0	11.09	-0.0004398
3/26/2018 5:20:00 AM.000	655.8	0.04	0.62	0.9	0	11.09	-0.0004398
3/26/2018 5:25:00 AM.000	652.6	0.09	0.7	0.83	0	11.09	-0.0004398
3/26/2018 5:30:00 AM.000	644.5	0.43	0.91	0.66	0	11.09	0
3/26/2018 5:35:00 AM.000	640.3	0.81	1.16	0.53	0	11.0925	0
3/26/2018 5:40:00 AM.000	652.5	0.73	1.23	0.45	6e-05	11.0925	0.00050074
3/26/2018 5:45:00 AM.000	646.9	0.64	1.26	0.63	0.00864	11.0925	0.0886704
3/26/2018 5:50:00 AM.000	638.7	1.39	1.04	0.8	0.02494	11.0925	0.338351
3/26/2018 5:55:00 AM.000	658	1.62	0.69	1.14	0.02729	11.0925	0.258048
3/26/2018 6:00:00 AM.000	667.9	0.34	0.57	1.24	0.04866	11.095	0.165248
3/26/2018 6:05:00 AM.000	657	0.05	0.38	1.47	0.10446	11.095	0.168705
3/26/2018 6:10:00 AM.000	643.3	0.04	0.18	1.33	0.12216	11.095	0.197366
3/26/2018 6:15:00 AM.000	649.5	0.04	0.18	1.2	0.0949	11.095	0.153225
3/26/2018 6:20:00 AM.000	624.9	0.04	0.37	0.93	0.01059	11.095	0.0167079
3/26/2018 6:25:00 AM.000	652.4	0.04	0.57	0.79	0	11.0925	-0.000439794
3/26/2018 6:30:00 AM.000	667.7	0.09	0.64	0.76	0	11.09	-0.0004398
3/26/2018 6:35:00 AM.000	644.2	0.5	0.85	0.68	0	11.09	0
3/26/2018 6:40:00 AM.000	642.4	0.6	1.08	0.93	0	11.09	0
3/26/2018 6:45:00 AM.000	633.3	0.76	1.17	0.86	0	11.09	0
3/26/2018 6:50:00 AM.000	630.1	0.61	1.19	0.75	0.00599	11.09	0.0420837
3/26/2018 6:55:00 AM.000	633.2	0.59	1.17	0.55	0.0232	11.09	0.175123
3/26/2018 7:00:00 AM.000	628.5	1.17	0.92	0.83	0.0439	11.0875	0.566986
3/26/2018 7:05:00 AM.000	616.3	1.72	0.6	1.06	0.04423	11.0875	0.492423
3/26/2018 7:10:00 AM.000	623.8	0.56	0.52	1.33	0.05752	11.085	0.373576
3/26/2018 7:15:00 AM.000	664.9	0.06	0.33	1.36	0.11515	11.085	0.18597
3/26/2018 7:20:00 AM.000	674.5	0.05	0.14	1.53	0.12849	11.08	0.207541
3/26/2018 7:25:00 AM.000	690.9	0.04	0.13	1.58	0.10752	11.08	0.173598
3/26/2018 7:30:00 AM.000	691.4	0.04	0.28	1.37	0.04299	11.0775	0.069142
3/26/2018 7:35:00 AM.000	666.4	0.04	0.48	1.31	0	11.0775	-0.000439832
3/26/2018 7:40:00 AM.000	657.6	0.04	0.55	1.08	0	11.0775	-0.000439832
3/26/2018 7:45:00 AM.000	640.6	0.04	0.57	1.01	0	11.0725	-0.000439845
3/26/2018 7:50:00 AM.000	629.8	0.11	0.57	0.95	0	11.0725	0
3/26/2018 7:55:00 AM.000	628.7	0.31	0.84	0.88	0	11.0725	0
3/26/2018 8:00:00 AM.000	624.2	0.66	1.5	0.66	0	11.0725	0
3/26/2018 8:05:00 AM.000	620.6	0.77	1.78	0.48	0	11.07	0
3/26/2018 8:10:00 AM.000	640.8	0.58	1.61	0.59	0.00461	11.07	0.0523231
3/26/2018 8:15:00 AM.000	646	0.78	1.18	1.09	0.01875	11.0675	0.214446
3/26/2018 8:20:00 AM.000	652.8	0.98	1.21	1.29	0.03225	11.0675	0.401923
3/26/2018 8:25:00 AM.000	646.2	0.58	1.05	1.4	0.05539	11.07	0.616963
3/26/2018 8:30:00 AM.000	644.2	0.07	0.57	1.44	0.10151	11.07	0.167886
3/26/2018 8:35:00 AM.000	630.2	0.04	0.42	1.29	0.11671	11.07	0.188429
3/26/2018 8:40:00 AM.000	638.4	0.04	0.57	1.24	0.05616	11.07	0.0904423
3/26/2018 8:45:00 AM.000	635.3	0.04	0.78	0.84	0	11.0675	-0.000439858
3/26/2018 8:50:00 AM.000	628	0.04	0.92	0.8	0	11.07	-0.000439852
3/26/2018 8:55:00 AM.000	656.6	0.07	0.92	0.58	0	11.0675	-0.000439858
3/26/2018 9:00:00 AM.000	669.3	0.13	0.92	0.58	0	11.0675	0
3/26/2018 9:05:00 AM.000	640.3	0.14	0.92	0.75	0	11.0675	0
3/26/2018 9:10:00 AM.000	639.6	0.56	0.92	0.87	0	11.0675	0
3/26/2018 9:15:00 AM.000	641.6	0.96	0.92	0.98	0	11.0675	0
3/26/2018 9:20:00 AM.000	636.1	0.84	0.92	1.02	0.0038	11.0675	0.0312902
3/26/2018 9:25:00 AM.000	637.5	0.39	0.92	1.17	0.01688	11.07	0.108491
3/26/2018 9:30:00 AM.000	950.4	0.06	0.92	1.32	0.06837	11.07	0.228069
3/26/2018 9:35:00 AM.000	1219.2	0.04	0.87	1.28	0.04331	11.07	0.0696475
3/26/2018 9:40:00 AM.000	1261.1	0.04	0.13	1.16	0	11.07	-0.000439852
3/26/2018 9:45:00 AM.000	1254.7	0.04	0.57	1.1	0	11.0725	-0.000439845
3/26/2018 9:50:00 AM.000	1153.7	0.04	1.43	0.96	0	11.0725	-0.000439845
3/26/2018 9:55:00 AM.000	770.5	0.04	1.72	0.83	0	11.0725	-0.000439845
3/26/2018 10:00:00 AM.000	639.2	0.05	1.98	0.65	0	11.0725	-0.000439845
3/26/2018 10:05:00 AM.000	592	0.21	2.39	1.05	0	11.0725	0
3/26/2018 10:10:00 AM.000	598.5	0.3	2.6	1.13	0	11.0775	0
3/26/2018 10:15:00 AM.000	626.4	0.58	2.71	1.24	0	11.0775	0
3/26/2018 10:20:00 AM.000	610.4	1.04	2.64	0.86	3e-05	11.0825	0.000404485
3/26/2018 10:25:00 AM.000	604.9	0.99	2.36	0.98	0.00671	11.085	0.0808396
3/26/2018 10:30:00 AM.000	624.5	0.75	2.17	0.88	0.0218	11.085	0.270081
3/26/2018 10:35:00 AM.000	638	0.78	1.94	1.14	0.04476	11.09	0.550396
3/26/2018 10:40:00 AM.000	637.4	1.21	1.53	1.07	0.0643	11.09	0.856593
3/26/2018 10:45:00 AM.000	642.8	1.31	1.27	1.4	0.0741	11.095	0.953309
3/26/2018 10:50:00 AM.000	1014.5	0.95	1.01	1.44	0.08951	11.0975	1.14654
3/26/2018 10:55:00 AM.000	1228.2	0.11	0.65	1.77	0.15457	11.1025	0.403049
3/26/2018 11:00:00 AM.000	1262.8	0.05	0.35	1.74	0.19307	11.105	0.312259
3/26/2018 11:05:00 AM.000	1220.9	0.04	0.47	1.65	0.21615	11.11	0.349682
3/26/2018 11:10:00 AM.000	1224.7	0.04	0.99	1.34	0.21337	11.115	0.34522
3/26/2018 11:15:00 AM.000	1220.8	0.04	1.25	1.05	0.03752	11.1175	0.0603463
3/26/2018 11:20:00 AM.000	1169.7	0.07	1.41	0.95	0	11.1175	-0.000439729
3/26/2018 11:25:00 AM.000	821.3	0.16	1.82	0.98	0	11.1225	0
3/26/2018 11:30:00 AM.000	644.3	0.24	2.16	0.98	0	11.1275	0
3/26/2018 11:35:00 AM.000	625.1	0.37	2.3	0.83	0	11.1275	0
3/26/2018 11:40:00 AM.000	629.2	0.76	2.2	0.78	0	11.1325	0
3/26/2018 11:45:00 AM.000	625.8	0.97	1.79	0.88	0.00598	11.1375	0.0767122
3/26/2018 11:50:00 AM.000	879.6	0.91	1.69	1.17	0.02041	11.1425	0.233814
3/26/2018 11:55:00 AM.000	1198.2	0.93	1.51	1.19	0.03832	11.1425	0.484746
3/26/2018 12:00:00 PM.000	1251.5	1.09	1.07	1.46	0.05369	11.1525	0.707885
3/26/2018 12:05:00 PM.000	1223.8	1.27	0.82	1.31	0.06304	11.1525	0.860583
3/26/2018 12:10:00 PM.000	1069.8	0.21	0.67	1.66	0.11658	11.1625	0.556133
3/26/2018 12:15:00 PM.000	729.6	0.05	0.37	1.52	0.16104	11.17	0.260786
3/26/2018 12:20:00 PM.000	646.5	0.04	0.31	1.54	0.17098	11.1725	0.276926
3/26/2018 12:25:00 PM.000	632.5	0.04	0.84	1.43	0.16005	11.175	0.259211
3/26/2018 12:30:00 PM.000	625.6	0.04	1.01	1.21	0.00833	11.1825	0.0130767
3/26/2018 12:35:00 PM.000	629.3	0.04	0.91	1.09	0	11.185	-0.000439555
3/26/2018 12:40:00 PM.000	620.8	0.08	1.26	0.81	0	11.1875	-0.000439549
3/26/2018 12:45:00 PM.000	837.2	0.44	1.51	0.76	0	11.195	0
3/26/2018 12:50:00 PM.000	1137.2	0.79	1.43	0.67	0	11.2	0
3/26/2018 12:55:00 PM.000	1202.6	1.42	1.55	0.65	0.0014	11.2025	0.0193278
3/26/2018 1:00:00 PM.000	1181.6	1.13	1.59	0.6	0.01032	11.205	0.130948
3/26/2018 1:05:00 PM.000	1168.2	0.71	1.01	0.92	0.0193	11.21	0.17778
3/26/2018 1:10:00 PM.000	1155.1	0.73	0.72	1.01	0.03559	11.21	0.340325
3/26/2018 1:15:00 PM.000	1158.1	0.45	0.74	1.32	0.06025	11.21	0.508503
3/26/2018 1:20:00 PM.000	1148.4	0.06	0.51	1.35	0.1187	11.2175	0.196678
3/26/2018 1:25:00 PM.000	1154	0.04	0.27	1.39	0.10786	11.22	0.174729
3/26/2018 1:30:00 PM.000	1130	0.04	0.58	1.15	0.06344	11.2225	0.102596
3/26/2018 1:35:00 PM.000	969.1	0.04	1.06	0.99	0	11.225	-0.000439452
3/26/2018 1:40:00 PM.000	586.5	0.04	1.07	0.74	0	11.23	-0.000439439
3/26/2018 1:45:00 PM.000	611	0.07	1.23	0.76	0	11.23	-0.000439439
3/26/2018 1:50:00 PM.000	630.4	0.25	1.65	0.6	0	11.235	0
3/26/2018 1:55:00 PM.000	658.3	0.55	1.7	0.87	0	11.2375	0
3/26/2018 2:00:00 PM.000	925.1	1.12	1.66	0.94	0	11.2375	0
3/26/2018 2:05:00 PM.000	1179.9	1.27	1.66	1	0.00609	11.24	0.0689657
3/26/2018 2:10:00 PM.000	1206.2	0.81	1.35	0.97	0.01197	11.2425	0.10383
3/26/2018 2:15:00 PM.000	1214.4	0.53	1.03	1.17	0.0319	11.2425	0.242236
3/26/2018 2:20:00 PM.000	1203.5	0.26	0.91	1.5	0.06507	11.245	0.479181
3/26/2018 2:25:00 PM.000	1199	0.05	0.73	1.52	0.11683	11.25	0.0141578
3/26/2018 2:30:00 PM.000	1171.4	0.04	0.56	1.25	0.09873	11.2525	0.160026
3/26/2018 2:35:00 PM.000	954.9	0.04	0.74	1.03	0.02806	11.255	0.045169
3/26/2018 2:40:00 PM.000	631.7	0.04	1.24	0.91	0	11.2575	-0.000439369
3/26/2018 2:45:00 PM.000	632.1	0.04	1.38	1.13	0	11.26	-0.000439362
3/26/2018 2:50:00 PM.000	634.3	0.07	1.43	1.02	0	11.2625	-0.000439356
3/26/2018 2:55:00 PM.000	639.8	0.42	1.68	0.95	0	11.265	0
3/26/2018 3:00:00 PM.000	646.6	0.71	1.85	0.69	0	11.2675	0
3/26/2018 3:05:00 PM.000	633.3	1.06	1.88	0.8	0.00015	11.27	0.00148024
3/26/2018 3:10:00 PM.000	801.3	1.31	1.76	1	0.00917	11.2725	0.118489
3/26/2018 3:15:00 PM.000	1182.1	1.1	1.42	1.18	0.01555	11.275	0.174196
3/26/2018 3:20:00 PM.000	1249.8	1.02	1.2	1.14	0.03135	11.275	0.333335
3/26/2018 3:25:00 PM.000	1281.6	0.59	1.01	1.26	0.05064	11.28	0.52419
3/26/2018 3:30:00 PM.000	1294.8	0.07	0.72	1.51	0.11303	11.28	0.367848
3/26/2018 3:35:00 PM.000	1272.7	0.04	0.56	1.57	0.14491	11.285	0.235263
3/26/2018 3:40:00 PM.000	1223.9	0.04	0.67	1.46	0.16365	11.285	0.265745
3/26/2018 3:45:00 PM.000	1222.7	0.04	1.1	1.04	0.0456	11.29	0.0737399
3/26/2018 3:50:00 PM.000	1197.9	0.04	1.38	0.85	0	11.2875	-0.000439292
3/26/2018 3:55:00 PM.000	854.8	0.11	1.43	0.68	0	11.295	-0.000439273
3/26/2018 4:00:00 PM.000	663.3	0.46	1.79	0.66	0	11.295	0
3/26/2018 4:05:00 PM.000	610.8	0.67	2.14	0.67	0	11.2975	0
3/26/2018 4:10:00 PM.000	614.1	0.69	2.18	0.76	0.00085	11.3	0.00854457
3/26/2018 4:15:00 PM.000	628.4	0.62	2.13	0.72	0.01303	11.3	0.135943
3/26/2018 4:20:00 PM.000	627.9	0.82	1.95	0.84	0.03422	11.305	0.385631
3/26/2018 4:25:00 PM.000	642.5	1.15	1.62	0.88	0.05113	11.3075	0.657549
3/26/2018 4:30:00 PM.000	788.3	1.46	1.45	1.23	0.06097	11.3075	0.783806
3/26/2018 4:35:00 PM.000	1175.2	0.91	1.29	1.38	0.07055	11.31	0.634841
3/26/2018 4:40:00 PM.000	1232	0.13	0.92	1.56	0.1263	11.31	0.502678
3/26/2018 4:45:00 PM.000	1263.9	0.05	0.67	1.42	0.17705	11.31	0.287711
3/26/2018 4:50:00 PM.000	1221.3	0.04	0.68	1.37	0.20384	11.3125	0.331332
3/26/2018 4:55:00 PM.000	1214.4	0.04	0.97	1.23	0.21526	11.3175	0.349961
3/26/2018 5:00:00 PM.000	1195.7	0.04	1.38	1.08	0.0483	11.3175	0.0781834
3/26/2018 5:05:00 PM.000	1180.3	0.04	1.52	0.92	0	11.32	-0.000439209
3/26/2018 5:10:00 PM.000	1193.8	0.06	1.71	0.72	0	11.32	0
3/26/2018 5:15:00 PM.000	858	0.06	2.09	0.71	0	11.32	0
3/26/2018 5:20:00 PM.000	647	0.16	2.32	0.66	0	11.3225	0
3/26/2018 5:25:00 PM.000	620	0.59	2.49	0.74	0	11.325	0
3/26/2018 5:30:00 PM.000	620.3	1.1	2.31	0.71	0	11.325	0
3/26/2018 5:35:00 PM.000	619.2	0.83	2.11	0.82	0.00312	11.325	0.033095
3/26/2018 5:40:00 PM.000	628.3	0.83	2	0.88	0.01805	11.3275	0.224835
3/26/2018 5:45:00 PM.000	603	1.15	1.8	1.09	0.03944	11.3275	0.550336
3/26/2018 5:50:00 PM.000	658	1.16	1.44	1.27	0.05174	11.33	0.672278
3/26/2018 5:55:00 PM.000	1117.3	1.27	1.27	1.5	0.06414	11.33	0.8633
3/26/2018 6:00:00 PM.000	1259.2	0.96	1.06	1.69	0.08677	11.3325	1.03623
3/26/2018 6:05:00 PM.000	1267.1	0.09	0.69	1.86	0.15216	11.335	0.19371
3/26/2018 6:10:00 PM.000	1245.9	0.05	0.49	1.83	0.18477	11.34	0.30049
3/26/2018 6:15:00 PM.000	1239.4	0.04	0.7	1.64	0.21266	11.34	0.345913
3/26/2018 6:20:00 PM.000	1228.7	0.04	1.15	1.33	0.21918	11.3425	0.356553
3/26/2018 6:25:00 PM.000	1142.9	0.04	1.34	1.04	0.06449	11.3425	0.1046
3/26/2018 6:30:00 PM.000	719.6	0.07	1.52	1.07	0	11.35	-0.000439132
3/26/2018 6:35:00 PM.000	604.9	0.1	1.87	0.98	0	11.35	0
3/26/2018 6:40:00 PM.000	615.6	0.1	2.17	0.91	0	11.35	0
3/26/2018 6:45:00 PM.000	603.7	0.41	2.27	0.83	0	11.35	0
3/26/2018 6:50:00 PM.000	597.4	0.62	2.18	0.96	0	11.35	0
3/26/2018 6:55:00 PM.000	721	0.86	2	0.91	0.00742	11.35	0.0891603
3/26/2018 7:00:00 PM.000	1128.1	1.04	1.94	0.93	0.01926	11.35	0.229618
3/26/2018 7:05:00 PM.000	1217.8	0.89	1.75	0.7	0.03292	11.35	0.411172
3/26/2018 7:10:00 PM.000	1212.9	1.08	1.41	0.91	0.0488	11.35	0.600039
3/26/2018 7:15:00 PM.000	1244.5	1.39	1.23	1.05	0.06152	11.3525	0.885308
3/26/2018 7:20:00 PM.000	1222	0.95	1.05	1.47	0.07993	11.355	1.00794
3/26/2018 7:25:00 PM.000	1219.6	0.09	0.74	1.81	0.13871	11.36	0.256536
3/26/2018 7:30:00 PM.000	1169.9	0.05	0.52	1.92	0.16481	11.36	0.268109
3/26/2018 7:35:00 PM.000	1168	0.04	0.72	1.83	0.19186	11.36	0.312185
3/26/2018 7:40:00 PM.000	833.5	0.04	1.21	1.53	0.1732	11.3675	0.28183
3/26/2018 7:45:00 PM.000	612.8	0.04	1.37	1.17	0.01207	11.3675	0.0192318
3/26/2018 7:50:00 PM.000	564	0.04	1.53	0.93	0	11.3675	-0.000439087
3/26/2018 7:55:00 PM.000	568.8	0.27	1.86	0.76	0	11.3675	0
3/26/2018 8:00:00 PM.000	571.9	0.43	1.99	0.78	0	11.3675	0
3/26/2018 8:05:00 PM.000	597	0.45	2.04	0.75	0	11.3675	0
3/26/2018 8:10:00 PM.000	986.9	0.87	2.15	0.74	0.00192	11.3675	0.024654
3/26/2018 8:15:00 PM.000	1199.6	1.29	1.88	0.64	0.01415	11.3725	0.172522
3/26/2018 8:20:00 PM.000	1210.7	1.33	1.56	0.92	0.02229	11.375	0.265851
3/26/2018 8:25:00 PM.000	1163.8	0.99	1.41	1	0.03355	11.3775	0.354875
3/26/2018 8:30:00 PM.000	1150.8	0.67	1.17	1.36	0.0552	11.3775	0.704561
3/26/2018 8:35:00 PM.000	1165.4	0.09	0.82	1.31	0.1097	11.3825	0.327319
3/26/2018 8:40:00 PM.000	1148.1	0.05	0.69	1.4	0.13659	11.3825	0.222245
3/26/2018 8:45:00 PM.000	1050.2	0.04	0.79	1.13	0.15402	11.385	0.250676
3/26/2018 8:50:00 PM.000	680.3	0.04	0.88	0.95	0.07586	11.3875	0.123251
3/26/2018 8:55:00 PM.000	559.7	0.04	0.88	0.72	0.00076	11.3875	0.000800146
3/26/2018 9:00:00 PM.000	541	0.05	0.88	0.74	0	11.385	-0.000439043
3/26/2018 9:05:00 PM.000	532.1	0.22	0.88	0.98	0	11.3875	0
3/26/2018 9:10:00 PM.000	544.6	0.63	0.88	0.93	0	11.39	0
3/26/2018 9:15:00 PM.000	561.5	1.12	0.88	0.77	0	11.395	0
3/26/2018 9:20:00 PM.000	568	1.11	1.65	0.53	0.00228	11.395	0.0235424
3/26/2018 9:25:00 PM.000	867.4	0.7	2.45	0.96	0.01477	11.395	0.123971
3/26/2018 9:30:00 PM.000	1145.8	0.84	1.99	1.22	0.04247	11.395	0.342852
3/26/2018 9:35:00 PM.000	1176.4	1.13	1.66	1.36	0.05557	11.395	0.443918
3/26/2018 9:40:00 PM.000	1177.9	0.65	1.58	1.24	0.06614	11.3975	0.399195
3/26/2018 9:45:00 PM.000	1208.4	0.21	1.3	1.42	0.10141	11.4025	0.656369
3/26/2018 9:50:00 PM.000	1183.3	0.05	0.92	1.55	0.16169	11.405	0.221812
3/26/2018 9:55:00 PM.000	1180	0.04	0.89	1.68	0.17037	11.4075	0.277482
3/26/2018 10:00:00 PM.000	1178	0.04	1.08	1.44	0.14259	11.41	0.232179
3/26/2018 10:05:00 PM.000	1167.6	0.04	1.54	1.13	0.00878	11.41	0.0138845
3/26/2018 10:10:00 PM.000	1196.2	0.04	1.96	0.82	0	11.415	-0.000438966
3/26/2018 10:15:00 PM.000	916	0.05	2.16	0.78	0	11.4175	-0.00043896
3/26/2018 10:20:00 PM.000	280.1	0.34	2.47	0.72	0	11.4175	0
3/26/2018 10:25:00 PM.000	139.9	0.74	2.87	0.85	0	11.415	0
3/26/2018 10:30:00 PM.000	450.3	0.72	3.1	0.87	0	11.42	0
3/26/2018 10:35:00 PM.000	822.2	0.65	2.84	0.8	0.00474	11.42	0.0588341
3/26/2018 10:40:00 PM.000	1206.5	0.91	2.4	0.72	0.01758	11.42	0.238743
3/26/2018 10:45:00 PM.000	1301.9	1.09	2.39	0.71	0.03686	11.42	0.492131
3/26/2018 10:50:00 PM.000	1253.4	1.01	2.24	0.94	0.046	11.425	0.628053
3/26/2018 10:55:00 PM.000	1235.7	1.22	1.73	1.14	0.05964	11.4225	0.84522
3/26/2018 11:00:00 PM.000	1266.6	1.47	1.46	1.38	0.07417	11.4275	0.947811
3/26/2018 11:05:00 PM.000	1094	1.2	1.33	1.54	0.08409	11.43	1.20053
3/26/2018 11:10:00 PM.000	735.7	0.17	0.9	1.79	0.14404	11.435	0.825192
3/26/2018 11:15:00 PM.000	661.1	0.05	0.57	1.88	0.1804	11.435	0.294035
3/26/2018 11:20:00 PM.000	641.4	0.04	0.72	1.93	0.21602	11.435	0.352179
3/26/2018 11:25:00 PM.000	635.9	0.04	1.17	1.53	0.23029	11.435	0.375473
3/26/2018 11:30:00 PM.000	633	0.04	1.29	1.24	0.13533	11.4425	0.220505
3/26/2018 11:35:00 PM.000	637.4	0.04	1.41	0.81	0.01412	11.4425	0.0226139
3/26/2018 11:40:00 PM.000	655.6	0.07	1.74	0.69	0	11.44	0
3/26/2018 11:45:00 PM.000	648.8	0.28	1.9	0.6	0	11.44	0
3/26/2018 11:50:00 PM.000	645.7	0.67	1.96	0.63	0	11.44	0
3/26/2018 11:55:00 PM.000	660.8	1.08	2.2	0.76	0.0007	11.4425	0.00842861
3/27/2018 12:00:00 AM.000	701.5	1.64	2.12	0.76	0.01191	11.44	0.166094
3/27/2018 12:05:00 AM.000	1083.6	1.53	1.53	0.9	0.0206	11.44	0.227324
3/27/2018 12:10:00 AM.000	1242.8	0.47	1.23	0.72	0.02991	11.4375	0.142486
3/27/2018 12:15:00 AM.000	1250.8	0.17	1.09	1.03	0.0756	11.4375	0.318641
3/27/2018 12:20:00 AM.000	1228.4	0.05	0.76	1.14	0.1211	11.44	0.0695512
3/27/2018 12:25:00 AM.000	1076.8	0.04	0.62	1.27	0.13911	11.44	0.226663
3/27/2018 12:30:00 AM.000	746.5	0.04	0.85	0.87	0.06355	11.44	0.103309
3/27/2018 12:35:00 AM.000	657	0.04	0.93	0.79	0	11.4375	-0.000438909
3/27/2018 12:40:00 AM.000	643.6	0.04	1.45	0.78	0	11.435	-0.000438915
3/27/2018 12:45:00 AM.000	629.2	0.04	1.7	0.8	0	11.4375	-0.000438909
3/27/2018 12:50:00 AM.000	621.1	0.14	1.63	0.82	0	11.435	0
3/27/2018 12:55:00 AM.000	636.3	0.67	1.95	0.83	0	11.435	0
3/27/2018 1:00:00 AM.000	644.7	1.06	2.29	0.94	0	11.4325	0
3/27/2018 1:05:00 AM.000	666.9	0.94	2.21	0.79	7e-05	11.4325	0.000744154
3/27/2018 1:10:00 AM.000	1068	1.06	2.13	0.7	0.00924	11.435	0.101857
3/27/2018 1:15:00 AM.000	1208.4	1.45	2.08	0.71	0.03159	11.4325	0.40717
3/27/2018 1:20:00 AM.000	1230.3	1.6	1.52	0.84	0.04381	11.4375	0.532672
3/27/2018 1:25:00 AM.000	1262.8	0.63	1.14	1.01	0.04146	11.4375	0.230403
3/27/2018 1:30:00 AM.000	1254.2	0.09	1.04	1.31	0.09622	11.44	0.270246
3/27/2018 1:35:00 AM.000	1230	0.05	0.8	1.49	0.15311	11.44	0.249518
3/27/2018 1:40:00 AM.000	1215.7	0.04	0.6	1.4	0.13672	11.4425	0.222774
3/27/2018 1:45:00 AM.000	1201.8	0.04	0.91	0.97	0.08751	11.4425	0.142433
3/27/2018 1:50:00 AM.000	932	0.04	1.55	0.59	0.00178	11.445	0.00246737
3/27/2018 1:55:00 AM.000	658.8	0.04	1.65	0.48	0	11.445	-0.00043889
3/27/2018 2:00:00 AM.000	621.9	0.11	1.88	0.56	0	11.445	0
3/27/2018 2:05:00 AM.000	614.2	0.22	2.4	0.58	0	11.445	0
3/27/2018 2:10:00 AM.000	629	0.57	2.58	0.81	0	11.445	0
3/27/2018 2:15:00 AM.000	646.2	0.79	2.55	0.83	0	11.4425	0
3/27/2018 2:20:00 AM.000	640.3	1.05	2.73	0.85	0.00699	11.4425	0.0829209
3/27/2018 2:25:00 AM.000	641.9	1.38	2.59	0.84	0.01859	11.4425	0.247352
3/27/2018 2:30:00 AM.000	647.2	1.47	1.95	0.91	0.03054	11.445	0.425496
3/27/2018 2:35:00 AM.000	690.4	1.3	1.75	1.2	0.03935	11.4475	0.403913
3/27/2018 2:40:00 AM.000	1077.2	0.46	1.64	1.38	0.06754	11.4475	0.438171
3/27/2018 2:45:00 AM.000	1229	0.06	1.09	1.56	0.13809	11.4475	0.142788
3/27/2018 2:50:00 AM.000	1209.4	0.05	0.82	1.42	0.15854	11.45	0.258445
3/27/2018 2:55:00 AM.000	1218.7	0.04	1.11	1.14	0.15783	11.45	0.257285
3/27/2018 3:00:00 AM.000	1251.6	0.04	1.43	0.7	0.03738	11.45	0.0605997
3/27/2018 3:05:00 AM.000	1166.4	0.04	1.75	0.63	0	11.45	-0.000438877
3/27/2018 3:10:00 AM.000	783.9	0.04	1.99	0.61	0	11.4525	-0.000438871
3/27/2018 3:15:00 AM.000	643.6	0.24	2.3	0.8	0	11.4525	0
3/27/2018 3:20:00 AM.000	615.7	0.37	2.72	0.71	0	11.4525	0
3/27/2018 3:25:00 AM.000	607.2	0.36	2.95	0.84	0	11.455	0
3/27/2018 3:30:00 AM.000	616.4	0.74	2.84	0.76	0	11.4525	0
3/27/2018 3:35:00 AM.000	610.6	1.02	2.55	0.67	0.00156	11.4525	0.0226325
3/27/2018 3:40:00 AM.000	620.3	1.35	2.44	0.49	0.0127	11.45	0.202775
3/27/2018 3:45:00 AM.000	631.4	1.62	2.25	0.75	0.02628	11.45	0.372449
3/27/2018 3:50:00 AM.000	621.9	0.86	1.82	1.08	0.03453	11.4475	0.314017
3/27/2018 3:55:00 AM.000	638.2	0.79	1.38	1.35	0.0588	11.4475	0.500344
3/27/2018 4:00:00 AM.000	645.4	0.72	1.26	1.63	0.08262	11.4475	0.773098
3/27/2018 4:05:00 AM.000	618.4	0.09	1	1.79	0.14708	11.4425	0.424086
3/27/2018 4:10:00 AM.000	627.9	0.05	0.72	1.79	0.18815	11.4425	0.306741
3/27/2018 4:15:00 AM.000	650.5	0.04	0.77	1.44	0.21381	11.4425	0.348634
3/27/2018 4:20:00 AM.000	933.8	0.04	1.06	1.03	0.22053	11.4375	0.359563
3/27/2018 4:25:00 AM.000	1186.9	0.04	1.27	0.82	0.03728	11.4375	0.0604184
3/27/2018 4:30:00 AM.000	1224.7	0.04	1.38	0.72	0	11.4375	-0.000438909
3/27/2018 4:35:00 AM.000	1250.2	0.12	1.65	0.88	0	11.4375	0
3/27/2018 4:40:00 AM.000	1214.9	0.31	2.04	0.79	0	11.435	0
3/27/2018 4:45:00 AM.000	1190.2	0.6	2.27	0.61	0	11.435	0
3/27/2018 4:50:00 AM.000	770	0.88	2.39	0.46	0.00038	11.44	0.00394769
3/27/2018 4:55:00 AM.000	668	0.98	2.05	0.39	0.01019	11.4425	0.132606
3/27/2018 5:00:00 AM.000	653	1.52	1.76	0.56	0.02	11.4375	0.313784
3/27/2018 5:05:00 AM.000	647.6	1.59	1.63	0.81	0.03021	11.4375	0.427284
3/27/2018 5:10:00 AM.000	652.2	0.82	1.28	1.22	0.03874	11.44	0.338293
3/27/2018 5:15:00 AM.000	651.1	0.63	0.78	1.52	0.05546	11.44	0.328669
3/27/2018 5:20:00 AM.000	658.3	0.23	0.65	1.54	0.09761	11.4425	0.460036
3/27/2018 5:25:00 AM.000	679.1	0.05	0.54	1.57	0.15631	11.4425	0.254758
3/27/2018 5:30:00 AM.000	688.8	0.04	0.34	1.53	0.17305	11.4375	0.282054
3/27/2018 5:35:00 AM.000	670.5	0.04	0.47	1.28	0.17036	11.44	0.27768
3/27/2018 5:40:00 AM.000	675	0.04	0.9	0.98	0.11115	11.44	0.181017
3/27/2018 5:45:00 AM.000	691.7	0.04	0.99	0.66	0	11.4425	-0.000438896
3/27/2018 5:50:00 AM.000	1089.4	0.08	1.06	0.57	0	11.44	-0.000438903
3/27/2018 5:55:00 AM.000	1245.1	0.26	1.37	0.49	0	11.4425	0
3/27/2018 6:00:00 AM.000	1246.7	0.29	1.6	0.48	0	11.44	0
3/27/2018 6:05:00 AM.000	1230.3	0.29	1.69	0.7	0	11.44	0
3/27/2018 6:10:00 AM.000	1267.7	0.54	1.75	0.93	0	11.44	0
3/27/2018 6:15:00 AM.000	1250.3	1.31	1.37	0.91	0.00057	11.44	0.0101047
3/27/2018 6:20:00 AM.000	1271.8	1.9	1.25	0.75	0.00332	11.44	0.0515869
3/27/2018 6:25:00 AM.000	1011.9	0.67	1.12	0.9	0.0186	11.4425	0.168566
3/27/2018 6:30:00 AM.000	712.1	0.07	0.67	1.22	0.07076	11.4425	0.0672104
3/27/2018 6:35:00 AM.000	633	0.05	0.43	1.34	0.06372	11.44	0.103586
3/27/2018 6:40:00 AM.000	633.3	0.04	0.6	1.13	0.02162	11.4375	0.0348544
3/27/2018 6:45:00 AM.000	619.2	0.04	1.02	0.9	0	11.4375	-0.000438909
3/27/2018 6:50:00 AM.000	607.6	0.04	1.12	0.85	0	11.4375	-0.000438909
3/27/2018 6:55:00 AM.000	713.9	0.15	1.18	0.86	0	11.4375	-0.000438909
3/27/2018 7:00:00 AM.000	1142.7	0.42	1.56	0.87	0	11.44	0
3/27/2018 7:05:00 AM.000	1221.8	0.55	1.73	0.77	0	11.4375	0
3/27/2018 7:10:00 AM.000	1277.5	0.93	1.67	0.62	1e-05	11.4375	0.000110646
3/27/2018 7:15:00 AM.000	1227.1	1.19	1.91	0.55	0.00638	11.4375	0.084368
3/27/2018 7:20:00 AM.000	1209.9	1.54	1.83	0.8	0.01812	11.4375	0.259004
3/27/2018 7:25:00 AM.000	1033.2	1.31	1.08	0.97	0.02816	11.4375	0.350086
3/27/2018 7:30:00 AM.000	713.8	0.6	0.81	1.38	0.0258	11.4375	0.138437
3/27/2018 7:35:00 AM.000	624.9	0.09	0.83	1.4	0.09129	11.4375	0.263087
3/27/2018 7:40:00 AM.000	602.9	0.05	0.51	1.62	0.13588	11.4375	0.221377
3/27/2018 7:45:00 AM.000	607.9	0.04	0.36	1.36	0.12045	11.435	0.196177
3/27/2018 7:50:00 AM.000	622.8	0.04	0.68	1.06	0.07379	11.435	0.120012
3/27/2018 7:55:00 AM.000	636.5	0.04	1.01	0.85	2e-05	11.435	-0.000406268
3/27/2018 8:00:00 AM.000	630.2	0.04	0.98	0.72	0	11.4325	-0.000438922
3/27/2018 8:05:00 AM.000	617	0.1	1.21	0.74	0	11.43	0
3/27/2018 8:10:00 AM.000	614.5	0.27	1.53	0.65	0	11.43	0
3/27/2018 8:15:00 AM.000	629.2	0.97	1.55	0.77	0	11.4275	0
3/27/2018 8:20:00 AM.000	619.9	1.24	1.6	0.87	0	11.4275	0
3/27/2018 8:25:00 AM.000	632.9	1.09	1.66	0.97	0.00351	11.4275	0.0409301
3/27/2018 8:30:00 AM.000	1004.3	1.43	1.21	1	0.0229	11.4275	0.261494
3/27/2018 8:35:00 AM.000	1235.4	0.97	0.81	1.43	0.02192	11.43	0.145983
3/27/2018 8:40:00 AM.000	1262.2	0.18	0.73	1.5	0.05652	11.43	0.18784
3/27/2018 8:45:00 AM.000	1223.8	0.05	0.54	1.57	0.11354	11.43	0.184875
3/27/2018 8:50:00 AM.000	1239.9	0.04	0.39	1.41	0.11119	11.4275	0.181029
3/27/2018 8:55:00 AM.000	1225	0.04	0.39	1.19	0.04341	11.4225	0.0704
3/27/2018 9:00:00 AM.000	850	0.04	0.39	0.87	0	11.4225	-0.000438947
3/27/2018 9:05:00 AM.000	629.6	0.04	0.39	0.78	0	11.425	-0.000438941
3/27/2018 9:10:00 AM.000	596.8	0.1	0.39	0.84	0	11.4225	-0.000438947
3/27/2018 9:15:00 AM.000	593.6	0.58	0.39	0.98	0	11.425	0
3/27/2018 9:20:00 AM.000	600.5	0.91	1.27	0.97	0	11.4225	0
3/27/2018 9:25:00 AM.000	620.7	0.94	1.97	0.92	0	11.4225	0
3/27/2018 9:30:00 AM.000	640.7	0.72	1.93	1.02	0.00614	11.4175	0.0528944
3/27/2018 9:35:00 AM.000	625.8	1.06	1.79	0.95	0.0278	11.4175	0.262652
3/27/2018 9:40:00 AM.000	620.1	1.64	1.42	1.05	0.04571	11.4175	0.515341
3/27/2018 9:45:00 AM.000	733.6	1.06	1.07	1.27	0.04022	11.4225	0.347713
3/27/2018 9:50:00 AM.000	1111.3	0.2	0.9	1.49	0.08352	11.42	0.30482
3/27/2018 9:55:00 AM.000	1189.5	0.05	0.62	1.76	0.14436	11.42	0.235122
3/27/2018 10:00:00 AM.000	1230.6	0.05	0.37	1.66	0.1623	11.4175	0.26438
3/27/2018 10:05:00 AM.000	1214.8	0.04	0.52	1.34	0.15762	11.42	0.256759
3/27/2018 10:10:00 AM.000	1211.2	0.04	0.85	0.87	0.05504	11.42	0.0893731
3/27/2018 10:15:00 AM.000	1258.3	0.04	1.1	0.53	0	11.415	-0.000438966
3/27/2018 10:20:00 AM.000	1256	0.05	1.28	0.51	0	11.415	-0.000438966
3/27/2018 10:25:00 AM.000	1267.7	0.35	1.53	0.65	0	11.415	0
3/27/2018 10:30:00 AM.000	1240.8	0.54	1.85	0.84	0	11.4125	0
3/27/2018 10:35:00 AM.000	1224.6	0.93	2.21	0.83	0	11.4125	0
3/27/2018 10:40:00 AM.000	1239.5	1.47	2.33	0.82	0.00405	11.4075	0.0538185
3/27/2018 10:45:00 AM.000	1202.1	1.33	1.7	0.89	0.00751	11.4125	0.100916
3/27/2018 10:50:00 AM.000	1218	1.12	1.35	1.08	0.01735	11.4075	0.170381
3/27/2018 10:55:00 AM.000	1188.5	0.82	1.36	1.28	0.04004	11.4075	0.387325
3/27/2018 11:00:00 AM.000	1231.4	0.08	1.02	1.36	0.09653	11.405	0.200603
3/27/2018 11:05:00 AM.000	1231.6	0.05	0.54	1.29	0.11263	11.405	0.183281
3/27/2018 11:10:00 AM.000	1207.6	0.05	0.81	1.03	0.12807	11.4025	0.208454
3/27/2018 11:15:00 AM.000	1153.5	0.04	1.36	0.83	0.03049	11.4025	0.0492927
3/27/2018 11:20:00 AM.000	1144.9	0.04	1.41	0.82	0	11.4025	-0.000438998
3/27/2018 11:25:00 AM.000	901.4	0.05	1.58	0.94	0	11.3975	-0.000439011
3/27/2018 11:30:00 AM.000	648.1	0.18	2	0.9	0	11.3975	0
3/27/2018 11:35:00 AM.000	606.7	0.5	2.22	0.7	0	11.3975	0
3/27/2018 11:40:00 AM.000	615.8	1.17	2.34	0.47	0	11.3975	0
3/27/2018 11:45:00 AM.000	596.3	1.3	2.39	0.47	0.00099	11.3975	0.0114884
3/27/2018 11:50:00 AM.000	613.3	1.14	1.91	0.8	0.00518	11.395	0.0483525
3/27/2018 11:55:00 AM.000	622.1	1.37	1.6	1.01	0.01903	11.3975	0.186145
3/27/2018 12:00:00 PM.000	797.3	0.92	1.48	1.24	0.02736	11.395	0.23154
3/27/2018 12:05:00 PM.000	1102.5	0.13	1.09	1.38	0.07277	11.3975	0.297737
3/27/2018 12:10:00 PM.000	1125.6	0.05	0.75	1.44	0.11615	11.395	0.188978
3/27/2018 12:15:00 PM.000	1068.7	0.05	0.78	1.43	0.13415	11.3975	0.218345
3/27/2018 12:20:00 PM.000	1066.4	0.04	0.96	1.12	0.14165	11.3975	0.230577
3/27/2018 12:25:00 PM.000	1101.1	0.04	1.32	0.95	0.03709	11.3975	0.0600507
3/27/2018 12:30:00 PM.000	1078	0.04	1.63	0.71	0	11.4	-0.000439004
3/27/2018 12:35:00 PM.000	1070.6	0.11	1.77	0.63	0	11.3975	-0.000439011
3/27/2018 12:40:00 PM.000	1089.7	0.75	1.92	0.68	0	11.4	0
3/27/2018 12:45:00 PM.000	1040.4	1.19	2.29	0.65	0	11.4	0
3/27/2018 12:50:00 PM.000	1057.6	1.29	2.47	0.7	2e-05	11.3975	0.000219725
3/27/2018 12:55:00 PM.000	1056.7	1.59	2.04	0.76	0.00486	11.4025	0.0759993
3/27/2018 1:00:00 PM.000	1004.4	1.23	1.58	1.04	0.0096	11.3975	0.09581
3/27/2018 1:05:00 PM.000	1010.5	0.5	1.5	1.13	0.02195	11.4025	0.0960718
3/27/2018 1:10:00 PM.000	979.8	0.07	1.2	1.4	0.07759	11.4	0.162698
3/27/2018 1:15:00 PM.000	942.4	0.05	0.83	1.37	0.107	11.4025	0.174087
3/27/2018 1:20:00 PM.000	895.6	0.05	0.94	1.2	0.1267	11.405	0.206232
3/27/2018 1:25:00 PM.000	881.9	0.04	1.28	0.82	0.13323	11.4075	0.216896
3/27/2018 1:30:00 PM.000	865.8	0.04	1.47	0.5	0.01284	11.4075	0.0205066
3/27/2018 1:35:00 PM.000	849	0.04	1.51	0.64	0	11.4125	-0.000438973
3/27/2018 1:40:00 PM.000	850.2	0.23	1.77	0.57	0	11.4125	0
3/27/2018 1:45:00 PM.000	850.7	0.44	2.01	0.78	0	11.415	0
3/27/2018 1:50:00 PM.000	853	0.61	2.13	0.77	0	11.4175	0
3/27/2018 1:55:00 PM.000	843.7	0.9	2.26	0.82	0.00016	11.4175	0.00134159
3/27/2018 2:00:00 PM.000	836.7	1.54	2.08	0.56	0.00431	11.42	0.0767186
3/27/2018 2:05:00 PM.000	835.2	1.95	1.63	0.61	0.00793	11.4225	0.12719
3/27/2018 2:10:00 PM.000	818.2	0.88	1.47	0.9	0.00919	11.425	0.0691199
3/27/2018 2:15:00 PM.000	811.7	0.21	1.16	1.32	0.04081	11.4275	0.188092
3/27/2018 2:20:00 PM.000	810	0.05	0.74	1.53	0.0851	11.425	0.0165797
3/27/2018 2:25:00 PM.000	818.9	0.05	0.67	1.4	0.10791	11.425	0.175665
3/27/2018 2:30:00 PM.000	806.9	0.04	0.87	1.19	0.12511	11.4275	0.203747
3/27/2018 2:35:00 PM.000	779.2	0.04	1.15	0.93	0.11286	11.4275	0.183754
3/27/2018 2:40:00 PM.000	784.4	0.04	1.42	0.79	0.00168	11.425	0.00230274
3/27/2018 2:45:00 PM.000	765.6	0.06	1.59	0.62	0	11.4325	-0.000438922
3/27/2018 2:50:00 PM.000	757.9	0.33	1.79	0.41	0	11.4325	0
3/27/2018 2:55:00 PM.000	775	0.63	2.02	0.34	0	11.4325	0
3/27/2018 3:00:00 PM.000	762.6	1.25	2.18	0.43	0	11.435	0
3/27/2018 3:05:00 PM.000	770.5	1.53	2.1	0.59	0.00105	11.4375	0.0126136
3/27/2018 3:10:00 PM.000	779.7	1.15	1.63	1	0.00413	11.435	0.0436904
3/27/2018 3:15:00 PM.000	808.2	1.24	1.38	1.15	0.01335	11.4375	0.149926
3/27/2018 3:20:00 PM.000	632.1	0.92	1.2	1.24	0.01865	11.44	0.219443
3/27/2018 3:25:00 PM.000	662.6	0.26	0.81	1.1	0.0548	11.44	0.441286
3/27/2018 3:30:00 PM.000	632	0.05	0.57	1.37	0.09124	11.44	0.148514
3/27/2018 3:35:00 PM.000	546.1	0.05	0.56	1.54	0.11976	11.44	0.195073
3/27/2018 3:40:00 PM.000	573.2	0.04	0.82	1.43	0.1501	11.44	0.244605
3/27/2018 3:45:00 PM.000	771.6	0.04	1.04	1.06	0.15031	11.4425	0.244962
3/27/2018 3:50:00 PM.000	781.5	0.05	1.09	0.69	0.09352	11.4375	0.152227
3/27/2018 3:55:00 PM.000	752.1	0.48	1.22	0.66	0.07681	11.44	0.128762
3/27/2018 4:00:00 PM.000	837.3	0.73	1.52	0.66	0.01152	11.44	0.111982
3/27/2018 4:05:00 PM.000	859.3	1.13	1.64	0.71	0.01227	11.44	0.141752
3/27/2018 4:10:00 PM.000	794.6	1.22	1.45	0.72	0.03332	11.44	0.338724
3/27/2018 4:15:00 PM.000	763.5	0.89	1.1	0.85	0.03842	11.44	0.331149
3/27/2018 4:20:00 PM.000	757.6	1.09	0.83	1	0.04041	11.44	0.407282
3/27/2018 4:25:00 PM.000	748.3	0.79	0.67	1.1	0.04546	11.44	0.445813
3/27/2018 4:30:00 PM.000	758.9	0.08	0.45	1.24	0.09745	11.435	0.175859
3/27/2018 4:35:00 PM.000	747	0.05	0.24	1.24	0.11054	11.435	0.18
3/27/2018 4:40:00 PM.000	741	0.05	0.31	1.14	0.12308	11.435	0.20047
3/27/2018 4:45:00 PM.000	719.6	0.04	0.68	0.87	0.13831	11.435	0.22533
3/27/2018 4:50:00 PM.000	777.8	0.04	0.88	0.64	0.02336	11.435	0.0376926
3/27/2018 4:55:00 PM.000	752.1	0.07	0.92	0.46	0	11.435	-0.000438915
3/27/2018 5:00:00 PM.000	679.3	0.5	1.24	0.5	0	11.4325	0
3/27/2018 5:05:00 PM.000	764.7	0.79	1.44	0.57	0	11.4325	0
3/27/2018 5:10:00 PM.000	762	0.86	1.45	0.72	1e-05	11.4325	8.99155e-05
3/27/2018 5:15:00 PM.000	761.3	1.42	1.41	0.66	0.00655	11.43	0.0830693
3/27/2018 5:20:00 PM.000	772.8	1.77	1.08	0.74	0.01184	11.43	0.158613
3/27/2018 5:25:00 PM.000	767	0.97	0.79	0.95	0.01073	11.4325	0.0639513
3/27/2018 5:30:00 PM.000	762	0.11	0.56	1.34	0.04604	11.43	0.09076
3/27/2018 5:35:00 PM.000	753.8	0.05	0.35	1.39	0.08799	11.43	0.143174
3/27/2018 5:40:00 PM.000	774.6	0.05	0.28	1.33	0.09435	11.4275	0.153545
3/27/2018 5:45:00 PM.000	670	0.04	0.42	0.91	0.09721	11.425	0.158203
3/27/2018 5:50:00 PM.000	641.7	0.04	0.85	0.75	0.03331	11.425	0.0539214
3/27/2018 5:55:00 PM.000	543.7	0.04	0.94	0.36	0	11.425	-0.000438941
3/27/2018 6:00:00 PM.000	605.1	0.14	1.09	0.41	0	11.425	-0.000438941
3/27/2018 6:05:00 PM.000	672.3	1.12	1.41	0.33	0	11.425	0
3/27/2018 6:10:00 PM.000	705.3	1.23	1.53	0.55	0	11.425	0
3/27/2018 6:15:00 PM.000	792.9	0.88	1.46	0.55	0	11.425	0
3/27/2018 6:20:00 PM.000	856.7	1.08	1.34	0.71	0.00923	11.425	0.0684464
3/27/2018 6:25:00 PM.000	857.1	1.06	0.96	0.75	0.0172	11.425	0.12059
3/27/2018 6:30:00 PM.000	709.5	0.35	0.75	1.11	0.02637	11.425	0.114443
3/27/2018 6:35:00 PM.000	682.2	0.06	0.6	1.2	0.06958	11.425	0.0240612
3/27/2018 6:40:00 PM.000	662.6	0.05	0.44	1.2	0.09783	11.425	0.159215
3/27/2018 6:45:00 PM.000	665	0.04	0.42	0.86	0.09322	11.425	0.151692
3/27/2018 6:50:00 PM.000	651.5	0.04	0.62	0.73	0.03887	11.4275	0.0629989
3/27/2018 6:55:00 PM.000	658	0.04	0.99	0.72	0	11.425	-0.000438941
3/27/2018 7:00:00 PM.000	730.5	0.04	1.07	0.57	0	11.42	-0.000438953
3/27/2018 7:05:00 PM.000	693.3	0.2	1.22	0.39	0	11.42	-0.000438953
3/27/2018 7:10:00 PM.000	663.6	0.77	1.54	0.29	0	11.42	0
3/27/2018 7:15:00 PM.000	655.1	0.84	1.7	0.43	0	11.42	0
3/27/2018 7:20:00 PM.000	696.6	0.98	1.7	0.62	0.00043	11.4175	0.00369628
3/27/2018 7:25:00 PM.000	736.8	1.06	1.56	0.82	0.00889	11.415	0.0923593
3/27/2018 7:30:00 PM.000	740.9	1.07	1.16	0.89	0.01682	11.415	0.224716
3/27/2018 7:35:00 PM.000	797.7	1.59	0.99	0.88	0.02518	11.415	0.369177
3/27/2018 7:40:00 PM.000	752.7	0.62	0.83	0.87	0.04184	11.415	0.370431
3/27/2018 7:45:00 PM.000	686.9	0.06	0.46	0.99	0.08685	11.4125	0.141254
3/27/2018 7:50:00 PM.000	630.6	0.05	0.31	1.18	0.10511	11.4125	0.171045
3/27/2018 7:55:00 PM.000	564.2	0.05	0.6	1.09	0.12684	11.4125	0.206497
3/27/2018 8:00:00 PM.000	593	0.04	0.95	0.95	0.08137	11.4075	0.132298
3/27/2018 8:05:00 PM.000	606.5	0.04	0.96	0.74	0	11.405	-0.000438992
3/27/2018 8:10:00 PM.000	618.2	0.22	1.15	0.63	0	11.4025	0
3/27/2018 8:15:00 PM.000	716	0.44	1.46	0.54	0	11.4	0
3/27/2018 8:20:00 PM.000	773	0.66	1.54	0.38	0	11.4	0
3/27/2018 8:25:00 PM.000	757.1	0.95	1.52	0.4	0.00056	11.395	0.00503333
3/27/2018 8:30:00 PM.000	710.7	1.03	1.4	0.27	0.00684	11.3925	0.0680177
3/27/2018 8:35:00 PM.000	598.9	1.02	1.05	0.41	0.01492	11.385	0.157348
3/27/2018 8:40:00 PM.000	614.9	1.44	0.87	0.6	0.02318	11.3825	0.341945
3/27/2018 8:45:00 PM.000	633.6	0.5	0.72	1.08	0.04765	11.38	0.379956
3/27/2018 8:50:00 PM.000	654.3	0.06	0.56	1.23	0.08504	11.3775	0.138186
3/27/2018 8:55:00 PM.000	665.7	0.05	0.56	1.14	0.10055	11.3725	0.16345
3/27/2018 9:00:00 PM.000	645.3	0.05	0.56	0.8	0.11176	11.3725	0.181721
3/27/2018 9:05:00 PM.000	639.8	0.04	0.56	0.51	0.03891	11.37	0.0629775
3/27/2018 9:10:00 PM.000	631.7	0.05	0.56	0.44	0	11.3625	-0.0004391
3/27/2018 9:15:00 PM.000	734.8	0.26	0.56	0.4	0	11.36	0
3/27/2018 9:20:00 PM.000	699.8	0.25	0.97	0.5	0	11.36	0
3/27/2018 9:25:00 PM.000	728.7	0.39	1.54	0.46	0	11.355	0
3/27/2018 9:30:00 PM.000	730.8	0.61	1.59	0.5	0	11.35	0
3/27/2018 9:35:00 PM.000	629.2	1.52	1.42	0.61	0.001	11.35	0.0194266
3/27/2018 9:40:00 PM.000	666.2	2.13	1.19	0.77	0.00442	11.345	0.0716972
3/27/2018 9:45:00 PM.000	655.5	0.95	0.96	1.01	0.00626	11.345	0.0453053
3/27/2018 9:50:00 PM.000	646.3	0.1	0.67	1.15	0.04891	11.34	0.0852062
3/27/2018 9:55:00 PM.000	662.9	0.05	0.36	1.16	0.08152	11.3375	0.132322
3/27/2018 10:00:00 PM.000	662.9	0.05	0.36	0.86	0.09411	11.3375	0.152826
3/27/2018 10:05:00 PM.000	592.4	0.05	0.64	0.58	0.08128	11.33	0.131908
3/27/2018 10:10:00 PM.000	589.9	0.04	0.93	0.44	0.00053	11.33	0.000423806
3/27/2018 10:15:00 PM.000	617.3	0.04	1.04	0.43	0	11.3275	-0.00043919
3/27/2018 10:20:00 PM.000	626.2	0.26	1.27	0.43	0	11.32	0
3/27/2018 10:25:00 PM.000	624.8	0.65	1.53	0.53	0	11.315	0
3/27/2018 10:30:00 PM.000	609.9	1.17	1.66	0.62	0	11.315	0
3/27/2018 10:35:00 PM.000	661.7	1.45	1.71	0.58	0.00031	11.3125	0.00310245
3/27/2018 10:40:00 PM.000	690	1.24	1.46	0.5	0.00378	11.3075	0.0451918
3/27/2018 10:45:00 PM.000	769.7	1.22	0.96	0.65	0.01221	11.305	0.120568
3/27/2018 10:50:00 PM.000	763.4	1.11	0.81	0.98	0.01465	11.3025	0.144296
3/27/2018 10:55:00 PM.000	809.5	0.31	0.63	1.33	0.05093	11.3	0.395157
3/27/2018 11:00:00 PM.000	711.9	0.05	0.31	1.47	0.09083	11.3	0.147352
3/27/2018 11:05:00 PM.000	699.6	0.05	0.27	1.33	0.10177	11.2925	0.165124
3/27/2018 11:10:00 PM.000	683.6	0.05	0.71	0.93	0.12183	11.29	0.197746
3/27/2018 11:15:00 PM.000	644.8	0.05	0.99	0.58	0.04015	11.29	0.0648742
3/27/2018 11:20:00 PM.000	621.7	0.04	0.98	0.46	0	11.2825	-0.000439305
3/27/2018 11:25:00 PM.000	661.5	0.16	1.34	0.49	0	11.2825	0
3/27/2018 11:30:00 PM.000	761.3	0.84	1.65	0.47	0	11.28	0
3/27/2018 11:35:00 PM.000	775.7	1.65	1.68	0.48	0	11.275	0
3/27/2018 11:40:00 PM.000	797.5	0.93	1.71	0.63	0	11.2725	0
3/27/2018 11:45:00 PM.000	844.4	0.37	1.3	0.72	0.0083	11.2725	0.0403635
3/27/2018 11:50:00 PM.000	908.7	1.24	0.93	1	0.02825	11.27	0.22734
3/27/2018 11:55:00 PM.000	881.4	1.06	0.92	1.13	0.04101	11.27	0.320443
3/28/2018 12:00:00 AM.000	854.2	0.09	0.78	1.38	0.08203	11.265	0.104824
3/28/2018 12:05:00 AM.000	826	0.05	0.41	1.32	0.11339	11.265	0.183907
3/28/2018 12:10:00 AM.000	710.9	0.05	0.5	1.14	0.11108	11.2625	0.180141
3/28/2018 12:15:00 AM.000	757.1	0.05	1.01	0.93	0.04372	11.26	0.070631
3/28/2018 12:20:00 AM.000	749.9	0.04	1.24	0.68	0	11.2575	-0.000439369
3/28/2018 12:25:00 AM.000	783.1	0.07	1.31	0.5	0	11.2525	-0.000439382
3/28/2018 12:30:00 AM.000	790.7	0.47	1.74	0.53	0	11.25	0
3/28/2018 12:35:00 AM.000	890	0.7	2.04	0.61	0	11.2475	0
3/28/2018 12:40:00 AM.000	927.9	0.9	2.08	0.73	0.00035	11.245	0.00348171
3/28/2018 12:45:00 AM.000	1039	1.05	2.05	0.74	0.00984	11.2425	0.103227
3/28/2018 12:50:00 AM.000	1031.1	0.91	1.62	0.9	0.01692	11.2375	0.163828
3/28/2018 12:55:00 AM.000	1041.1	1.15	1.32	0.99	0.03036	11.2375	0.377318
3/28/2018 1:00:00 AM.000	945.8	1.63	1.19	1.05	0.04266	11.2325	0.538245
3/28/2018 1:05:00 AM.000	838.1	0.24	0.92	1.39	0.08028	11.2325	0.346001
3/28/2018 1:10:00 AM.000	842.6	0.05	0.48	1.59	0.12057	11.2275	0.195406
3/28/2018 1:15:00 AM.000	845	0.05	0.55	1.58	0.14217	11.225	0.230478
3/28/2018 1:20:00 AM.000	859.1	0.05	0.96	1.01	0.1232	11.225	0.199666
3/28/2018 1:25:00 AM.000	843.8	0.05	1.31	0.69	0.00749	11.2225	0.0117253
3/28/2018 1:30:00 AM.000	848.5	0.06	1.44	0.56	0	11.2175	-0.000439471
3/28/2018 1:35:00 AM.000	938	0.17	1.79	0.61	0	11.215	0
3/28/2018 1:40:00 AM.000	970.8	0.32	2.18	0.69	0	11.215	0
3/28/2018 1:45:00 AM.000	958.9	0.85	2.32	0.76	0	11.2075	0
3/28/2018 1:50:00 AM.000	948.1	1.37	2.53	0.8	0.00365	11.205	0.0454394
3/28/2018 1:55:00 AM.000	847.1	1.42	2.26	0.94	0.01293	11.205	0.145938
3/28/2018 2:00:00 AM.000	955.1	1.43	1.63	1.07	0.0198	11.2	0.253353
3/28/2018 2:05:00 AM.000	973.1	1.06	1.43	1.33	0.02446	11.195	0.224499
3/28/2018 2:10:00 AM.000	1003	0.17	1.23	1.31	0.07699	11.195	0.303088
3/28/2018 2:15:00 AM.000	1001.9	0.05	0.74	1.24	0.13083	11.1925	0.211895
3/28/2018 2:20:00 AM.000	985.8	0.05	0.7	1.11	0.15076	11.1875	0.244212
3/28/2018 2:25:00 AM.000	1015.2	0.05	1.02	1.13	0.14517	11.1825	0.235113
3/28/2018 2:30:00 AM.000	1030.7	0.05	1.51	1.01	0.01131	11.1825	0.017912
3/28/2018 2:35:00 AM.000	995.8	0.04	1.73	0.84	0	11.1825	-0.000439561
3/28/2018 2:40:00 AM.000	981.3	0.15	2.03	0.79	0	11.1775	0
3/28/2018 2:45:00 AM.000	880.6	0.26	2.47	0.69	0	11.1725	0
3/28/2018 2:50:00 AM.000	977.8	0.52	2.73	0.69	0	11.17	0
3/28/2018 2:55:00 AM.000	999.3	0.85	2.91	0.68	1e-05	11.1675	0.000121883
3/28/2018 3:00:00 AM.000	1009	1.16	3.16	0.77	0.0084	11.1625	0.0950914
3/28/2018 3:05:00 AM.000	1024.4	1.34	2.98	0.77	0.01944	11.165	0.241411
3/28/2018 3:10:00 AM.000	1005.2	1.69	2.16	0.8	0.03556	11.16	0.583844
3/28/2018 3:15:00 AM.000	1030.2	1.48	1.98	1.04	0.0374	11.1575	0.45885
3/28/2018 3:20:00 AM.000	1067.7	0.4	1.83	1.33	0.06446	11.1575	0.382205
3/28/2018 3:25:00 AM.000	1113.9	0.06	1.17	1.63	0.14132	11.1525	0.040148
3/28/2018 3:30:00 AM.000	1093.6	0.05	0.93	1.64	0.17636	11.155	0.285535
3/28/2018 3:35:00 AM.000	997.2	0.05	1.28	1.54	0.19741	11.1475	0.319611
3/28/2018 3:40:00 AM.000	977.6	0.05	1.67	1.16	0.13679	11.1475	0.221331
3/28/2018 3:45:00 AM.000	971.5	0.05	2.09	0.92	0.00106	11.1425	0.00127866
3/28/2018 3:50:00 AM.000	991.9	0.06	2.33	0.82	0	11.14	-0.000439671
3/28/2018 3:55:00 AM.000	1033.4	0.17	2.61	0.8	0	11.14	0
3/28/2018 4:00:00 AM.000	1033.7	0.4	3.05	0.79	0	11.1375	0
3/28/2018 4:05:00 AM.000	1058.2	0.93	3.34	0.64	0	11.13	0
3/28/2018 4:10:00 AM.000	1092.3	1.01	3.52	0.7	0.00133	11.13	0.0121435
3/28/2018 4:15:00 AM.000	1087.1	0.84	3.56	0.79	0.00986	11.13	0.0990903
3/28/2018 4:20:00 AM.000	1053.7	1.59	3.19	0.98	0.0363	11.1275	0.586451
3/28/2018 4:25:00 AM.000	1068.9	1.75	2.57	1.05	0.04711	11.125	0.842693
3/28/2018 4:30:00 AM.000	1012.5	1.24	2.41	1.35	0.04933	11.1225	0.538859
3/28/2018 4:35:00 AM.000	1025.8	0.5	2.11	1.59	0.07006	11.12	0.402617
3/28/2018 4:40:00 AM.000	1005	0.73	1.42	1.83	0.10457	11.115	0.652595
3/28/2018 4:45:00 AM.000	991.7	1.13	1.28	1.89	0.1183	11.1125	1.17886
3/28/2018 4:50:00 AM.000	970.7	0.22	1.25	2.19	0.16865	11.1125	1.12102
3/28/2018 4:55:00 AM.000	971.7	0.05	0.83	2.42	0.22974	11.11	0.371695
3/28/2018 5:00:00 AM.000	997.9	0.05	0.7	2.22	0.25436	11.105	0.411526
3/28/2018 5:05:00 AM.000	994.4	0.05	1.18	1.87	0.28245	11.1025	0.456993
3/28/2018 5:10:00 AM.000	1000.1	0.05	1.71	1.26	0.24017	11.1025	0.38852
3/28/2018 5:15:00 AM.000	984	0.08	1.8	1.04	0.12995	11.1	0.210004
3/28/2018 5:20:00 AM.000	993.5	0.51	2.21	0.61	0.07643	11.1	0.239605
3/28/2018 5:25:00 AM.000	1039.7	0.35	2.7	0.49	1e-05	11.0925	8.73751e-05
3/28/2018 5:30:00 AM.000	1028.5	0.51	2.72	0.27	0	11.09	0
3/28/2018 5:35:00 AM.000	1005	0.93	2.86	0.45	0.0331	11.0875	0.438237
3/28/2018 5:40:00 AM.000	994	1.37	3.06	0.56	0.03011	11.0875	0.347061
3/28/2018 5:45:00 AM.000	997.8	1.17	2.59	0.89	0.03439	11.0875	0.402449
3/28/2018 5:50:00 AM.000	899.7	1.42	1.77	0.97	0.05844	11.0775	0.973319
3/28/2018 5:55:00 AM.000	715.4	1.94	1.78	1.17	0.07413	11.0775	1.10154
3/28/2018 6:00:00 AM.000	629.3	0.63	1.57	1.47	0.08326	11.0775	0.664213
3/28/2018 6:05:00 AM.000	600.3	0.07	0.77	1.78	0.15074	11.0725	0.243513
3/28/2018 6:10:00 AM.000	592.4	0.05	0.62	1.91	0.1918	11.0725	0.309963
3/28/2018 6:15:00 AM.000	599.9	0.05	0.99	1.77	0.21941	11.065	0.354583
3/28/2018 6:20:00 AM.000	594.9	0.05	1.25	1.52	0.23417	11.065	0.378466
3/28/2018 6:25:00 AM.000	600.7	0.05	1.38	1.18	0.15442	11.0625	0.249409
3/28/2018 6:30:00 AM.000	582.3	0.05	1.65	1	0.01368	11.06	0.0216928
3/28/2018 6:35:00 AM.000	592.8	0.11	1.9	0.84	0	11.0575	-0.000439884
3/28/2018 6:40:00 AM.000	604.3	0.35	2.06	0.8	0	11.05	0
3/28/2018 6:45:00 AM.000	597.9	0.47	2.29	0.71	0	11.05	0
3/28/2018 6:50:00 AM.000	622.7	0.93	2.43	0.7	0	11.05	0
3/28/2018 6:55:00 AM.000	624.2	1.58	2.13	0.68	0.00774	11.0475	0.105755
3/28/2018 7:00:00 AM.000	628.8	1.56	1.69	0.99	0.01424	11.0425	0.165814
3/28/2018 7:05:00 AM.000	613	0.9	1.49	1.28	0.01981	11.04	0.171344
3/28/2018 7:10:00 AM.000	608.2	0.26	1.11	1.73	0.05818	11.0375	0.353961
3/28/2018 7:15:00 AM.000	613.9	0.05	0.66	1.43	0.10534	11.035	0.169887
3/28/2018 7:20:00 AM.000	613.5	0.05	0.63	1.34	0.13175	11.035	0.21259
3/28/2018 7:25:00 AM.000	625.9	0.05	0.86	1	0.13365	11.0325	0.21565
3/28/2018 7:30:00 AM.000	895	0.05	1.15	0.96	0.04859	11.03	0.0781173
3/28/2018 7:35:00 AM.000	1055.4	0.05	1.37	0.62	0	11.025	-0.000439968
3/28/2018 7:40:00 AM.000	1071.4	0.06	1.58	0.69	0	11.025	-0.000439968
3/28/2018 7:45:00 AM.000	1056.4	0.19	1.89	0.85	0	11.0225	0
3/28/2018 7:50:00 AM.000	779.8	0.4	2.27	0.96	0	11.02	0
3/28/2018 7:55:00 AM.000	595.7	0.78	2.55	0.95	0	11.0175	0
3/28/2018 8:00:00 AM.000	556.8	1.52	2.49	0.75	0.00193	11.015	0.0254577
3/28/2018 8:05:00 AM.000	546.2	1.56	1.95	0.86	0.00461	11.0125	0.057481
3/28/2018 8:10:00 AM.000	537.6	1.13	1.68	0.81	0.0118	11.0125	0.12042
3/28/2018 8:15:00 AM.000	554.4	0.63	1.46	1.17	0.02724	11.0075	0.164979
3/28/2018 8:20:00 AM.000	559.2	0.67	0.94	1.46	0.05157	11.0075	0.306636
3/28/2018 8:25:00 AM.000	573.2	0.18	0.7	1.69	0.08804	11.005	0.459992
3/28/2018 8:30:00 AM.000	587.3	0.05	0.65	1.75	0.13762	11.005	0.221923
3/28/2018 8:35:00 AM.000	561.8	0.05	0.51	1.51	0.17161	11	0.276811
3/28/2018 8:40:00 AM.000	568.7	0.05	0.58	1.32	0.17529	10.9975	0.282739
3/28/2018 8:45:00 AM.000	553.3	0.05	1.13	0.98	0.08696	10.9975	0.140043
3/28/2018 8:50:00 AM.000	549.3	0.05	1.27	0.75	0	10.995	-0.000440046
3/28/2018 8:55:00 AM.000	568.1	0.14	1.27	0.67	0	10.99	-0.000440059
3/28/2018 9:00:00 AM.000	588.7	0.29	1.27	0.51	0	10.99	0
3/28/2018 9:05:00 AM.000	562.6	0.35	1.27	0.75	0	10.985	0
3/28/2018 9:10:00 AM.000	579.9	0.54	1.27	0.81	0	10.985	0
3/28/2018 9:15:00 AM.000	581.9	1.16	1.27	0.89	0.00688	10.985	0.117609
3/28/2018 9:20:00 AM.000	850.8	1.95	1.22	0.69	0.01427	10.9825	0.235517
3/28/2018 9:25:00 AM.000	1128.1	1.16	0.96	0.88	0.01224	10.98	0.107071
3/28/2018 9:30:00 AM.000	1131.2	0.35	0.66	1.31	0.03094	10.9825	0.134851
3/28/2018 9:35:00 AM.000	1133.5	0.06	0.4	1.75	0.08622	10.9825	0.0409413
3/28/2018 9:40:00 AM.000	1114.5	0.05	0.29	1.7	0.10286	10.9875	0.16569
3/28/2018 9:45:00 AM.000	1070.3	0.05	0.36	1.31	0.08091	10.9875	0.130238
3/28/2018 9:50:00 AM.000	616.1	0.05	0.75	0.87	0.00162	10.9875	0.00217641
3/28/2018 9:55:00 AM.000	185.4	0.05	1.2	0.65	0	10.9875	-0.000440065
3/28/2018 10:00:00 AM.000	108.5	0.05	1.39	0.74	0	10.9875	-0.000440065
3/28/2018 10:05:00 AM.000	374.4	0.45	1.6	0.77	0	10.99	0
3/28/2018 10:10:00 AM.000	554.8	1.22	1.75	0.81	0	10.9875	0
3/28/2018 10:15:00 AM.000	599.1	1.21	1.75	0.71	0	10.905	0
3/28/2018 10:20:00 AM.000	594.8	1.13	1.67	0.83	0.00417	10.9675	0.042698
3/28/2018 10:25:00 AM.000	833.2	1.22	1.39	1	0.02059	10.98	0.314323
3/28/2018 10:30:00 AM.000	1121.1	2.04	1.02	1.23	0.02636	10.985	0.435414
3/28/2018 10:35:00 AM.000	1210.5	1.19	0.81	1.6	0.03214	10.9625	0.277764
3/28/2018 10:40:00 AM.000	1202.9	0.85	0.52	1.82	0.08282	10.925	0.0640552
3/28/2018 10:45:00 AM.000	1209.1	0.07	0.24	1.72	0.11939	10.9675	0.192296
3/28/2018 10:50:00 AM.000	1175.6	0.05	0.31	1.13	0.11713	10.98	0.188704
3/28/2018 10:55:00 AM.000	1204.8	0.05	0.85	0.76	0.10141	10.9825	0.163329
3/28/2018 11:00:00 AM.000	1127.5	0.05	1.2	0.58	0.00151	10.985	0.0019986
3/28/2018 11:05:00 AM.000	735	0.06	1.3	0.56	0	10.985	-0.000440072
3/28/2018 11:10:00 AM.000	582.4	0.38	1.74	0.58	0	10.985	0
3/28/2018 11:15:00 AM.000	559.4	0.67	2.22	0.6	0	10.985	0
3/28/2018 11:20:00 AM.000	570.8	0.76	2.3	0.68	3e-05	10.9825	0.000237383
3/28/2018 11:25:00 AM.000	577.3	0.84	2.01	0.81	0.00881	10.9825	0.105061
3/28/2018 11:30:00 AM.000	580.7	0.95	1.73	0.81	0.02118	10.9825	0.23152
3/28/2018 11:35:00 AM.000	573.3	0.98	1.64	1.15	0.038	10.9825	0.442956
3/28/2018 11:40:00 AM.000	633.1	1.24	1.33	1.17	0.04996	10.9825	0.772373
3/28/2018 11:45:00 AM.000	1013.4	1.7	0.98	1.44	0.05924	10.985	0.732897
3/28/2018 11:50:00 AM.000	1167.2	0.78	0.77	1.27	0.07172	10.985	0.613952
3/28/2018 11:55:00 AM.000	1211.9	0.08	0.49	1.36	0.13164	10.9875	0.0439438
3/28/2018 12:00:00 PM.000	1200.2	0.05	0.27	1.39	0.16427	10.985	0.264858
3/28/2018 12:05:00 PM.000	1185.7	0.05	0.4	1.54	0.17146	10.9875	0.276486
3/28/2018 12:10:00 PM.000	1214.8	0.05	0.93	1.29	0.14982	10.99	0.24155
3/28/2018 12:15:00 PM.000	1238.9	0.05	1.12	1.08	0.00586	10.99	0.00902504
3/28/2018 12:20:00 PM.000	1223.4	0.05	1.23	0.93	0	10.99	-0.000440059
3/28/2018 12:25:00 PM.000	1079.4	0.13	1.66	1.04	0	10.9875	0
3/28/2018 12:30:00 PM.000	1080.1	0.52	2.02	0.86	0	10.99	0
3/28/2018 12:35:00 PM.000	1076	1.02	2.17	0.82	0	10.99	0
3/28/2018 12:40:00 PM.000	1068.1	1.05	2.1	0.75	0.00484	10.99	0.0513964
3/28/2018 12:45:00 PM.000	1073.6	1.2	1.61	0.86	0.0117	10.9925	0.148472
3/28/2018 12:50:00 PM.000	1085.3	1.78	1.46	0.9	0.02515	10.99	0.318485
3/28/2018 12:55:00 PM.000	1119.1	0.63	1.31	1.11	0.04502	10.9925	0.342843
3/28/2018 1:00:00 PM.000	1050.3	0.07	0.81	1.51	0.10207	10.9925	0.0774794
3/28/2018 1:05:00 PM.000	1045.2	0.05	0.64	1.61	0.12549	10.9925	0.202264
3/28/2018 1:10:00 PM.000	1023.9	0.05	0.83	1.29	0.12361	10.9925	0.199227
3/28/2018 1:15:00 PM.000	982.8	0.05	1.3	0.85	0.01905	10.9925	0.0303314
3/28/2018 1:20:00 PM.000	986.9	0.05	1.55	0.62	0	10.99	-0.000440059
3/28/2018 1:25:00 PM.000	967.2	0.12	1.69	0.62	0	10.9875	-0.000440065
3/28/2018 1:30:00 PM.000	953.6	0.4	2.04	0.56	0	10.99	0
3/28/2018 1:35:00 PM.000	919.8	0.69	2.35	0.62	0	10.99	0
3/28/2018 1:40:00 PM.000	933.1	1.26	2.45	0.65	0.00022	10.985	0.00265432
3/28/2018 1:45:00 PM.000	933	1.38	2.37	0.72	0.00962	10.9825	0.10829
3/28/2018 1:50:00 PM.000	946.1	1.36	1.82	0.89	0.01776	10.9825	0.22791
3/28/2018 1:55:00 PM.000	960.5	1	1.6	1.21	0.02715	10.9825	0.233326
3/28/2018 2:00:00 PM.000	1006.1	0.42	1.41	1.34	0.0547	10.985	0.311627
3/28/2018 2:05:00 PM.000	961.6	0.07	1.04	1.33	0.12145	10.9825	0.130814
3/28/2018 2:10:00 PM.000	846.8	0.05	0.86	1.18	0.15265	10.9825	0.246077
3/28/2018 2:15:00 PM.000	834.4	0.05	1.03	1.2	0.17262	10.985	0.278343
3/28/2018 2:20:00 PM.000	702	0.05	1.37	1.11	0.10284	10.985	0.165648
3/28/2018 2:25:00 PM.000	701.3	0.05	1.69	0.82	0.00012	10.985	-0.00024627
3/28/2018 2:30:00 PM.000	843.3	0.07	1.79	0.57	0	10.9925	-0.000440052
3/28/2018 2:35:00 PM.000	928.2	0.21	2.01	0.62	0	10.9925	0
3/28/2018 2:40:00 PM.000	899.9	0.63	2.3	0.97	0	10.9925	0
3/28/2018 2:45:00 PM.000	828.1	1.13	2.41	0.96	0	11	0
3/28/2018 2:50:00 PM.000	775.6	1.06	2.53	0.81	0.004	11.0025	0.0353766
3/28/2018 2:55:00 PM.000	638.2	1.05	2.29	0.75	0.02083	11.0075	0.171354
3/28/2018 3:00:00 PM.000	530	0.96	1.76	1.06	0.04268	11.0075	0.403934
3/28/2018 3:05:00 PM.000	726.7	1.36	1.57	1.23	0.04994	11.0175	0.665959
3/28/2018 3:10:00 PM.000	686.1	1.28	1.47	1.31	0.0643	11.0175	0.768944
3/28/2018 3:15:00 PM.000	687.6	0.14	1.04	1.5	0.12263	11.02	0.330572
3/28/2018 3:20:00 PM.000	689.8	0.05	0.65	1.64	0.17333	11.025	0.279756
3/28/2018 3:25:00 PM.000	727.5	0.05	0.82	1.51	0.20667	11.025	0.333651
3/28/2018 3:30:00 PM.000	753.5	0.05	1.08	1.17	0.24372	11.025	0.393544
3/28/2018 3:35:00 PM.000	736.8	0.05	1.27	0.81	0.19576	11.025	0.316015
3/28/2018 3:40:00 PM.000	766.8	0.05	1.36	0.82	0.04458	11.025	0.0716256
3/28/2018 3:45:00 PM.000	833.1	0.07	1.6	0.62	0	11.0225	0
3/28/2018 3:50:00 PM.000	846.7	0.12	1.82	0.67	0	11.0225	0
3/28/2018 3:55:00 PM.000	772.1	0.5	1.94	0.55	0	11.0225	0
3/28/2018 4:00:00 PM.000	814.2	0.84	2.08	0.85	0.00062	11.02	0.00650186
3/28/2018 4:05:00 PM.000	835.7	1.01	1.78	0.9	0.01127	11.0225	0.123165
3/28/2018 4:10:00 PM.000	863.7	1.05	1.53	0.86	0.02059	11.02	0.218256
3/28/2018 4:15:00 PM.000	855.6	1.16	1.42	0.78	0.03271	11.02	0.499982
3/28/2018 4:20:00 PM.000	848	1.63	1.15	0.93	0.04799	11.02	0.698739
3/28/2018 4:25:00 PM.000	698.8	1.43	0.77	1.3	0.05071	11.025	0.48372
3/28/2018 4:30:00 PM.000	685.2	0.18	0.56	1.6	0.08633	11.0225	0.293613
3/28/2018 4:35:00 PM.000	682.3	0.05	0.35	1.82	0.14818	11.02	0.239071
3/28/2018 4:40:00 PM.000	676.1	0.05	0.28	1.69	0.17763	11.0175	0.286656
3/28/2018 4:45:00 PM.000	604	0.05	0.49	1.5	0.18875	11.0175	0.304629
3/28/2018 4:50:00 PM.000	696.6	0.05	0.87	1.07	0.16392	11.0175	0.264497
3/28/2018 4:55:00 PM.000	770.4	0.05	0.89	0.81	0.06549	11.0175	0.105409
3/28/2018 5:00:00 PM.000	821.1	0.27	1.04	0.64	0	11.0175	0
3/28/2018 5:05:00 PM.000	840.8	0.51	1.4	0.6	0	11.015	0
3/28/2018 5:10:00 PM.000	905.7	0.81	1.51	0.61	0.00164	11.015	0.0146762
3/28/2018 5:15:00 PM.000	888.6	0.99	1.47	0.61	0.01201	11.0125	0.104483
3/28/2018 5:20:00 PM.000	875.6	1.04	1.21	0.74	0.02954	11.0125	0.300938
3/28/2018 5:25:00 PM.000	915.7	0.93	0.87	0.88	0.0396	11.01	0.397169
3/28/2018 5:30:00 PM.000	857	0.93	0.71	1.1	0.05116	11.01	0.665975
3/28/2018 5:35:00 PM.000	829.9	0.12	0.55	1.39	0.0952	11.0075	0.274066
3/28/2018 5:40:00 PM.000	809.2	0.05	0.29	1.37	0.13276	11.0075	0.214083
3/28/2018 5:45:00 PM.000	809.7	0.05	0.31	1.19	0.14219	11.0075	0.229321
3/28/2018 5:50:00 PM.000	829.9	0.05	0.37	1.1	0.10483	11.0025	0.168932
3/28/2018 5:55:00 PM.000	880.4	0.05	0.58	0.91	0.00851	11.0025	0.0133094
3/28/2018 6:00:00 PM.000	844	0.05	1	0.9	0	10.9975	-0.000440039
3/28/2018 6:05:00 PM.000	826.4	0.06	1.11	0.62	0	10.995	-0.000440046
3/28/2018 6:10:00 PM.000	833.2	0.37	1.28	0.64	0	10.995	0
3/28/2018 6:15:00 PM.000	820.8	0.97	1.65	0.52	0	10.99	0
3/28/2018 6:20:00 PM.000	783	1.12	1.82	0.52	0	10.985	0
3/28/2018 6:25:00 PM.000	812.8	1.01	1.78	0.72	0.00304	10.9825	0.0294234
3/28/2018 6:30:00 PM.000	799.4	1.28	1.68	0.87	0.02305	10.9825	0.265253
3/28/2018 6:35:00 PM.000	803.4	1.54	1.23	1.08	0.0421	10.9775	0.458458
3/28/2018 6:40:00 PM.000	824.2	0.7	0.89	1.2	0.0404	10.9775	0.202184
3/28/2018 6:45:00 PM.000	852.8	0.11	0.75	1.43	0.09782	10.9725	0.217177
3/28/2018 6:50:00 PM.000	882	0.05	0.55	1.56	0.15382	10.9675	0.247878
3/28/2018 6:55:00 PM.000	864.7	0.05	0.39	1.6	0.17488	10.9675	0.281876
3/28/2018 7:00:00 PM.000	862.6	0.05	0.56	1.46	0.17916	10.9625	0.288751
3/28/2018 7:05:00 PM.000	859.9	0.05	1.05	1.28	0.10866	10.9575	0.174933
3/28/2018 7:10:00 PM.000	790.2	0.05	1.2	0.74	0	10.9575	-0.000440143
3/28/2018 7:15:00 PM.000	837.1	0.14	1.27	0.42	0	10.95	-0.000440163
3/28/2018 7:20:00 PM.000	881.9	0.85	1.64	0.37	0	10.945	0
3/28/2018 7:25:00 PM.000	912.8	1.36	1.93	0.51	0	10.945	0
3/28/2018 7:30:00 PM.000	925.3	1.32	1.89	0.75	5e-05	10.9425	0.000501657
3/28/2018 7:35:00 PM.000	935.4	0.65	1.84	0.73	0.00753	10.935	0.0432348
3/28/2018 7:40:00 PM.000	827	0.54	1.68	0.97	0.04112	10.9325	0.206168
3/28/2018 7:45:00 PM.000	790.9	0.85	1.21	1.05	0.06492	10.93	0.583314
3/28/2018 7:50:00 PM.000	789.7	1.64	1.01	1.21	0.06933	10.925	0.656588
3/28/2018 7:55:00 PM.000	794.7	0.64	1.04	1.39	0.09405	10.9225	0.732265
3/28/2018 8:00:00 PM.000	743	0.07	0.64	1.56	0.15614	10.9175	0.0593469
3/28/2018 8:05:00 PM.000	756.7	0.05	0.31	1.62	0.18934	10.915	0.304839
3/28/2018 8:10:00 PM.000	789.1	0.05	0.52	1.36	0.20929	10.91	0.336965
3/28/2018 8:15:00 PM.000	791.2	0.05	0.95	0.98	0.21712	10.9075	0.349567
3/28/2018 8:20:00 PM.000	890.6	0.05	1.05	0.71	0.02724	10.9	0.0434641
3/28/2018 8:25:00 PM.000	905.4	0.08	1.16	0.52	0	10.895	-0.000440306
3/28/2018 8:30:00 PM.000	923.7	0.64	1.51	0.57	0	10.895	0
3/28/2018 8:35:00 PM.000	985.6	1.45	1.72	0.62	0	10.89	0
3/28/2018 8:40:00 PM.000	915.8	1.31	1.75	0.76	0.00036	10.8825	0.00359949
3/28/2018 8:45:00 PM.000	889.6	0.63	1.58	0.73	0.01273	10.8825	0.083564
3/28/2018 8:50:00 PM.000	886.9	0.74	1.28	1.02	0.04129	10.8775	0.262106
3/28/2018 8:55:00 PM.000	876.7	0.64	1.27	1.37	0.05032	10.8725	0.260295
3/28/2018 9:00:00 PM.000	822.7	0.09	1.27	1.72	0.09779	10.8675	0.278265
3/28/2018 9:05:00 PM.000	841.8	0.05	1.27	1.56	0.14977	10.8625	0.240738
3/28/2018 9:10:00 PM.000	876	0.05	1.27	1.11	0.15681	10.8625	0.252075
3/28/2018 9:15:00 PM.000	910.4	0.05	1.27	1.04	0.06714	10.8575	0.107664
3/28/2018 9:20:00 PM.000	922.4	0.05	1.21	0.94	4e-05	10.855	-0.000376009
3/28/2018 9:25:00 PM.000	935.2	0.05	1.21	1.09	0	10.8475	-0.00044043
3/28/2018 9:30:00 PM.000	1008.8	0.11	1.31	1	0	10.8425	-0.000440443
3/28/2018 9:35:00 PM.000	1034.5	0.5	1.55	0.88	0	10.84	0
3/28/2018 9:40:00 PM.000	1265.6	0.71	1.82	0.67	0	10.8375	0
3/28/2018 9:45:00 PM.000	1224.3	1.02	1.93	0.48	0	10.835	0
3/28/2018 9:50:00 PM.000	1085.3	1.22	2.01	0.57	0.00475	10.8325	0.0521785
3/28/2018 9:55:00 PM.000	1115.1	1.36	1.98	1.03	0.0172	10.83	0.17769
3/28/2018 10:00:00 PM.000	1043.1	1.15	1.73	1.1	0.04135	10.8275	0.391589
3/28/2018 10:05:00 PM.000	1003.2	1.16	1.07	1.33	0.05158	10.825	0.476078
3/28/2018 10:10:00 PM.000	1012.6	1.09	0.94	1.27	0.06069	10.8225	0.405941
3/28/2018 10:15:00 PM.000	1009.2	0.12	0.89	1.83	0.1207	10.8175	0.188102
3/28/2018 10:20:00 PM.000	1026	0.05	0.43	2	0.17499	10.815	0.281033
3/28/2018 10:25:00 PM.000	1174.7	0.05	0.43	1.88	0.18135	10.8075	0.291212
3/28/2018 10:30:00 PM.000	1186	0.05	0.75	1.39	0.20445	10.805	0.328342
3/28/2018 10:35:00 PM.000	1166	0.05	1.17	1.1	0.07123	10.805	0.114107
3/28/2018 10:40:00 PM.000	1128.4	0.05	1.29	0.74	0	10.7975	-0.000440561
3/28/2018 10:45:00 PM.000	1049	0.1	1.57	0.85	0	10.7925	0
3/28/2018 10:50:00 PM.000	1047	0.36	1.99	0.61	0	10.79	0
3/28/2018 10:55:00 PM.000	1053.2	0.86	2.13	0.82	0	10.79	0
3/28/2018 11:00:00 PM.000	1085.7	1.45	2.36	0.59	0.00215	10.7825	0.0252162
3/28/2018 11:05:00 PM.000	1048	1.32	2.43	0.71	0.00811	10.78	0.0787702
3/28/2018 11:10:00 PM.000	1024.1	1.22	1.78	0.82	0.02618	10.7775	0.282511
3/28/2018 11:15:00 PM.000	1001.2	1.22	1.34	1.04	0.03713	10.775	0.317159
3/28/2018 11:20:00 PM.000	1013.6	0.48	1.38	1.31	0.05817	10.77	0.289178
3/28/2018 11:25:00 PM.000	1013	0.07	1.08	1.48	0.12444	10.765	0.036848
3/28/2018 11:30:00 PM.000	1057.5	0.05	0.64	1.41	0.15456	10.7625	0.247862
3/28/2018 11:35:00 PM.000	1059.7	0.05	0.84	1.26	0.16844	10.7575	0.270128
3/28/2018 11:40:00 PM.000	1041.8	0.05	1.33	1.21	0.11853	10.7525	0.189934
3/28/2018 11:45:00 PM.000	1036.6	0.05	1.52	1.2	0.00039	10.7475	0.000185626
3/28/2018 11:50:00 PM.000	1016.5	0.05	1.68	1.08	0	10.7475	-0.000440692
3/28/2018 11:55:00 PM.000	1024.1	0.05	2.05	0.87	0	10.7425	-0.000440705
3/29/2018 12:00:00 AM.000	1025.5	0.06	2.37	0.8	0	10.735	-0.000440724
3/29/2018 12:05:00 AM.000	1018.6	0.41	2.56	0.64	0	10.7325	0
3/29/2018 12:10:00 AM.000	1013.7	1.1	2.82	0.56	0	10.73	0
3/29/2018 12:15:00 AM.000	1002.4	1.24	3.13	0.5	0.00023	10.7225	0.00232704
3/29/2018 12:20:00 AM.000	1001.7	1	2.81	0.66	0.00863	10.7225	0.0825851
3/29/2018 12:25:00 AM.000	991	0.73	2.26	0.95	0.02086	10.7175	0.168926
3/29/2018 12:30:00 AM.000	1032	1.16	2.28	1.02	0.04002	10.7175	0.443183
3/29/2018 12:35:00 AM.000	1024.3	1.42	2.12	1.2	0.05416	10.7125	0.575918
3/29/2018 12:40:00 AM.000	1062.5	1.23	1.58	1.22	0.06318	10.71	0.644571
3/29/2018 12:45:00 AM.000	1053.4	1.12	1.31	1.45	0.07626	10.7025	0.639463
3/29/2018 12:50:00 AM.000	1021	0.36	1.19	1.63	0.11583	10.7	0.702562
3/29/2018 12:55:00 AM.000	1004.4	0.06	0.8	1.69	0.17612	10.7	0.282079
3/29/2018 1:00:00 AM.000	1015.9	0.05	0.63	1.69	0.20501	10.695	0.328384
3/29/2018 1:05:00 AM.000	995.7	0.05	0.9	1.55	0.23356	10.69	0.374132
3/29/2018 1:10:00 AM.000	997.6	0.05	1.37	1.25	0.23816	10.685	0.381464
3/29/2018 1:15:00 AM.000	1012	0.05	1.5	1.11	0.09421	10.685	0.150631
3/29/2018 1:20:00 AM.000	990.4	0.12	1.73	0.65	0.00226	10.68	0.00318275
3/29/2018 1:25:00 AM.000	1008.9	0.78	2.1	0.6	0	10.675	0
3/29/2018 1:30:00 AM.000	973	1.03	2.31	0.59	0	10.675	0
3/29/2018 1:35:00 AM.000	997.7	0.97	2.34	0.78	0.001	10.6675	0.00927605
3/29/2018 1:40:00 AM.000	1008.3	0.99	2.41	0.95	0.01581	10.665	0.190927
3/29/2018 1:45:00 AM.000	997.2	1.73	2.02	1.14	0.03815	10.66	0.504146
3/29/2018 1:50:00 AM.000	1046.1	1.7	1.5	1.47	0.04169	10.6575	0.459581
3/29/2018 1:55:00 AM.000	969.2	0.7	1.35	1.58	0.04932	10.6525	0.242401
3/29/2018 2:00:00 AM.000	1006	0.09	1.14	1.74	0.11755	10.65	0.205089
3/29/2018 2:05:00 AM.000	979.6	0.05	0.66	1.49	0.15605	10.645	0.249558
3/29/2018 2:10:00 AM.000	941.9	0.05	0.71	1.52	0.17489	10.64	0.279707
3/29/2018 2:15:00 AM.000	947.5	0.05	0.91	1.26	0.1918	10.635	0.306758
3/29/2018 2:20:00 AM.000	943.4	0.05	1.17	1.28	0.17581	10.63	0.281114
3/29/2018 2:25:00 AM.000	937.4	0.05	1.53	0.85	0.02464	10.6275	0.0390169
3/29/2018 2:30:00 AM.000	915.4	0.09	1.72	0.52	0	10.6225	-0.00044102
3/29/2018 2:35:00 AM.000	906.1	0.35	1.93	0.29	0	10.615	0
3/29/2018 2:40:00 AM.000	901.4	0.4	2.25	0.33	0	10.615	0
3/29/2018 2:45:00 AM.000	930.9	0.42	2.4	0.33	0	10.61	0
3/29/2018 2:50:00 AM.000	961.9	0.59	2.45	0.4	0.00307	10.6075	0.0318855
3/29/2018 2:55:00 AM.000	967.1	1.03	2.47	0.47	0.01213	10.6025	0.131394
3/29/2018 3:00:00 AM.000	987.2	1.42	2.35	0.66	0.02076	10.6	0.246594
3/29/2018 3:05:00 AM.000	1006.8	1.51	1.81	0.91	0.03094	10.595	0.359827
3/29/2018 3:10:00 AM.000	1036.9	1.51	1.6	1.17	0.03564	10.59	0.384434
3/29/2018 3:15:00 AM.000	988.6	0.56	1.42	1.44	0.05833	10.585	0.359741
3/29/2018 3:20:00 AM.000	997.8	0.07	0.93	1.57	0.11499	10.585	0.0708422
3/29/2018 3:25:00 AM.000	918.1	0.05	0.73	1.52	0.14612	10.5775	0.233275
3/29/2018 3:30:00 AM.000	883.4	0.05	0.96	1.31	0.17156	10.575	0.273949
3/29/2018 3:35:00 AM.000	874.5	0.05	1.29	1	0.17521	10.57	0.279754
3/29/2018 3:40:00 AM.000	908.6	0.05	1.48	0.8	0.01711	10.5625	0.0269162
3/29/2018 3:45:00 AM.000	935.4	0.08	1.62	0.7	0	10.5575	-0.000441192
3/29/2018 3:50:00 AM.000	972.9	0.14	1.91	0.69	0	10.5525	0
3/29/2018 3:55:00 AM.000	945.9	0.2	2.12	0.71	0	10.5475	0
3/29/2018 4:00:00 AM.000	957.1	0.53	2.28	0.65	0	10.5425	0
3/29/2018 4:05:00 AM.000	941.7	0.75	2.46	0.57	0.00124	10.5425	0.0129233
3/29/2018 4:10:00 AM.000	921.6	1.12	2.13	0.63	0.00897	10.5325	0.102649
3/29/2018 4:15:00 AM.000	932.2	1.24	1.79	0.76	0.01683	10.53	0.216282
3/29/2018 4:20:00 AM.000	982.1	1.53	1.72	0.95	0.02465	10.5275	0.375923
3/29/2018 4:25:00 AM.000	1019.3	1.5	1.45	1.08	0.03275	10.5225	0.416109
3/29/2018 4:30:00 AM.000	1026.9	0.94	0.95	1.19	0.03845	10.52	0.303169
3/29/2018 4:35:00 AM.000	973.8	0.34	0.74	1.29	0.06327	10.515	0.322813
3/29/2018 4:40:00 AM.000	804.4	0.06	0.64	1.42	0.12102	10.5125	0.0543416
3/29/2018 4:45:00 AM.000	781.1	0.05	0.43	1.51	0.15298	10.51	0.243856
3/29/2018 4:50:00 AM.000	768.4	0.05	0.49	1.35	0.17091	10.505	0.272456
3/29/2018 4:55:00 AM.000	770.7	0.05	0.97	1.07	0.19209	10.5025	0.306257
3/29/2018 5:00:00 AM.000	791.3	0.05	1.15	0.74	0.09546	10.4975	0.151956
3/29/2018 5:05:00 AM.000	810.9	0.12	1.23	0.6	0.01573	10.495	0.0246693
3/29/2018 5:10:00 AM.000	886	0.25	1.59	0.55	0.00428	10.49	0.0211456
3/29/2018 5:15:00 AM.000	952.6	0.45	1.8	0.47	0	10.4875	0
3/29/2018 5:20:00 AM.000	1000.7	0.62	1.77	0.58	6e-05	10.485	0.000502629
3/29/2018 5:25:00 AM.000	1052.7	0.61	1.9	0.54	0.01009	10.4825	0.079092
3/29/2018 5:30:00 AM.000	1013.1	0.98	1.64	0.67	0.02406	10.475	0.250884
3/29/2018 5:35:00 AM.000	1011.8	1.28	1.27	0.48	0.03778	10.4725	0.454825
3/29/2018 5:40:00 AM.000	1008.4	1.63	1.22	0.6	0.04383	10.47	0.606383
3/29/2018 5:45:00 AM.000	969.7	0.65	1.02	0.81	0.06329	10.4675	0.585179
3/29/2018 5:50:00 AM.000	953.6	0.07	0.59	1.25	0.10505	10.4625	0.0628761
3/29/2018 5:55:00 AM.000	940.9	0.05	0.42	1.29	0.12117	10.46	0.192828
3/29/2018 6:00:00 AM.000	902	0.05	0.72	1.19	0.14634	10.455	0.232947
3/29/2018 6:05:00 AM.000	897.2	0.05	1.17	0.76	0.07877	10.4525	0.125177
3/29/2018 6:10:00 AM.000	901.7	0.05	1.25	0.62	0	10.45	-0.000441477
3/29/2018 6:15:00 AM.000	892.7	0.1	1.49	0.41	0	10.445	-0.00044149
3/29/2018 6:20:00 AM.000	883.8	0.1	1.84	0.33	0	10.44	0
3/29/2018 6:25:00 AM.000	895.3	0.12	1.97	0.27	0	10.4375	0
3/29/2018 6:30:00 AM.000	944	0.39	2.12	0.37	0	10.4325	0
3/29/2018 6:35:00 AM.000	929	1.08	2.13	0.59	1e-05	10.4275	0.000164228
3/29/2018 6:40:00 AM.000	935.1	1.87	1.85	0.67	0.00571	10.425	0.0949125
3/29/2018 6:45:00 AM.000	779.8	1.82	1.72	0.64	0.00535	10.4225	0.0585977
3/29/2018 6:50:00 AM.000	579.3	0.61	1.48	0.96	0.00958	10.42	0.0431911
3/29/2018 6:55:00 AM.000	574.7	0.42	0.99	1.2	0.03001	10.4175	0.123515
3/29/2018 7:00:00 AM.000	564	0.73	0.82	1.39	0.04861	10.41	0.359786
3/29/2018 7:05:00 AM.000	546.3	0.14	0.8	1.41	0.09716	10.41	0.296932
3/29/2018 7:10:00 AM.000	551.5	0.05	0.57	1.31	0.13424	10.405	0.213396
3/29/2018 7:15:00 AM.000	554.6	0.05	0.5	1.46	0.15661	10.4025	0.249015
3/29/2018 7:20:00 AM.000	552.5	0.05	0.8	1.18	0.18134	10.4	0.28839
3/29/2018 7:25:00 AM.000	547.1	0.05	1.06	1.02	0.13525	10.4	0.214979
3/29/2018 7:30:00 AM.000	566.5	0.06	1.06	0.63	0.03451	10.3975	0.0545213
3/29/2018 7:35:00 AM.000	565.4	0.2	1.3	0.55	0	10.3925	0
3/29/2018 7:40:00 AM.000	554.8	0.3	1.55	0.5	0	10.3875	0
3/29/2018 7:45:00 AM.000	560.7	0.26	1.55	0.61	0	10.385	0
3/29/2018 7:50:00 AM.000	544.5	0.6	1.57	0.6	0	10.38	0
3/29/2018 7:55:00 AM.000	541.9	0.89	1.4	0.52	0.00641	10.38	0.0563383
3/29/2018 8:00:00 AM.000	548.6	0.96	1.19	0.51	0.01397	10.38	0.120585
3/29/2018 8:05:00 AM.000	516	0.88	1.06	0.57	0.02693	10.375	0.258993
3/29/2018 8:10:00 AM.000	519.4	0.39	0.83	0.85	0.04871	10.3725	0.43635
3/29/2018 8:15:00 AM.000	528.9	0.06	0.58	0.94	0.0849	10.37	0.134687
3/29/2018 8:20:00 AM.000	515.6	0.05	0.49	0.96	0.11124	10.3675	0.1766
3/29/2018 8:25:00 AM.000	518.5	0.05	0.55	0.73	0.11853	10.3675	0.188203
3/29/2018 8:30:00 AM.000	516.9	0.05	0.73	0.69	0.05034	10.3625	0.0796666
3/29/2018 8:35:00 AM.000	540.5	0.05	0.97	0.56	0	10.36	-0.000441716
3/29/2018 8:40:00 AM.000	541.1	0.05	1.06	0.67	0	10.36	-0.000441716
3/29/2018 8:45:00 AM.000	528.9	0.25	1.23	0.71	0	10.355	0
3/29/2018 8:50:00 AM.000	525.9	1.02	1.36	0.8	0	10.355	0
3/29/2018 8:55:00 AM.000	539.7	1.86	1.36	0.84	0	10.3525	0
3/29/2018 9:00:00 AM.000	542.7	1.84	1.36	0.67	0	10.35	0
3/29/2018 9:05:00 AM.000	542.6	1.36	1.36	0.69	0.00417	10.3475	0.0297018
3/29/2018 9:10:00 AM.000	536.9	0.47	1.36	1	0.00547	10.3475	0.035614
3/29/2018 9:15:00 AM.000	536.7	0.55	1.36	1.25	0.02576	10.345	0.245521
3/29/2018 9:20:00 AM.000	537.2	0.98	0.94	1.31	0.04735	10.3425	0.491434
3/29/2018 9:25:00 AM.000	549.6	1.95	0.29	1.5	0.04752	10.3425	0.650492
3/29/2018 9:30:00 AM.000	555.2	1.42	0.19	1.86	0.04262	10.3425	0.404382
3/29/2018 9:35:00 AM.000	541.5	0.21	0.12	2.12	0.05607	10.3425	0.0887426
3/29/2018 9:40:00 AM.000	537.9	0.06	0.08	2.07	0.05238	10.34	0.0828684
3/29/2018 9:45:00 AM.000	524.8	0.05	0.12	1.95	0.03537	10.34	0.0558141
3/29/2018 9:50:00 AM.000	559.1	0.05	0.4	1.98	0.0694	10.3375	0.109932
3/29/2018 9:55:00 AM.000	912.5	0.05	0.46	1.65	0.02939	10.335	0.0462973
3/29/2018 10:00:00 AM.000	1161.9	0.05	0.58	1.37	0.00077	10.335	0.000782753
3/29/2018 10:05:00 AM.000	1123.3	0.05	0.88	1.18	0	10.3325	-0.00044179
3/29/2018 10:10:00 AM.000	1116	0.07	1.04	1.08	0	10.33	-0.000441796
3/29/2018 10:15:00 AM.000	885	0.2	1.36	0.87	0	10.3275	0
3/29/2018 10:20:00 AM.000	610.8	0.64	1.72	0.71	0	10.3275	0
3/29/2018 10:25:00 AM.000	552.8	1.08	1.91	0.6	0.0008	10.3225	0.00788377
3/29/2018 10:30:00 AM.000	543	0.94	1.71	0.75	0.0071	10.3225	0.0652007
3/29/2018 10:35:00 AM.000	545.1	0.83	1.28	0.79	0.01992	10.32	0.151013
3/29/2018 10:40:00 AM.000	545.7	0.8	1.24	1.26	0.03066	10.3175	0.275042
3/29/2018 10:45:00 AM.000	536.9	0.44	1.11	1.48	0.05328	10.3175	0.459772
3/29/2018 10:50:00 AM.000	536.4	0.07	0.69	1.42	0.10539	10.315	0.183455
3/29/2018 10:55:00 AM.000	536.5	0.05	0.6	1.22	0.1335	10.315	0.211763
3/29/2018 11:00:00 AM.000	544.5	0.05	0.83	0.99	0.16098	10.315	0.255444
3/29/2018 11:05:00 AM.000	537.4	0.05	1.02	0.92	0.12366	10.315	0.196122
3/29/2018 11:10:00 AM.000	557.4	0.05	1.16	0.49	0.00341	10.315	0.00497854
3/29/2018 11:15:00 AM.000	692.6	0.09	1.34	0.31	0	10.315	-0.000441836
3/29/2018 11:20:00 AM.000	1066.7	0.17	1.54	0.17	0	10.3175	0
3/29/2018 11:25:00 AM.000	1163.4	0.23	1.67	0.28	0	10.3175	0
3/29/2018 11:30:00 AM.000	1170	0.63	1.77	0.48	0	10.3175	0
3/29/2018 11:35:00 AM.000	1134.7	1.19	1.68	0.5	0.0009	10.3175	0.0110996
3/29/2018 11:40:00 AM.000	1127.7	1.71	1.41	0.5	0.00416	10.315	0.042524
3/29/2018 11:45:00 AM.000	1067.5	1.22	1.24	0.62	0.00415	10.3175	0.0377992
3/29/2018 11:50:00 AM.000	935.1	0.93	0.96	0.82	0.01507	10.3175	0.13668
3/29/2018 11:55:00 AM.000	625.9	0.27	0.64	1.21	0.04877	10.32	0.290528
3/29/2018 12:00:00 PM.000	539.1	0.06	0.47	1.14	0.09105	10.32	0.144304
3/29/2018 12:05:00 PM.000	501.4	0.05	0.48	1.36	0.12898	10.32	0.204603
3/29/2018 12:10:00 PM.000	510.4	0.05	0.73	1.11	0.15624	10.32	0.247939
3/29/2018 12:15:00 PM.000	506.6	0.05	0.96	1.03	0.14133	10.3175	0.224223
3/29/2018 12:20:00 PM.000	509.4	0.1	0.99	0.59	0.06584	10.315	0.104214
3/29/2018 12:25:00 PM.000	517.1	0.58	1.21	0.33	0.04013	10.315	0.194102
3/29/2018 12:30:00 PM.000	739.4	1.04	1.44	0.41	0.00587	10.315	0.0552279
3/29/2018 12:35:00 PM.000	1053.8	1.11	1.37	0.66	0.00493	10.3125	0.0457176
3/29/2018 12:40:00 PM.000	1120.8	0.99	1.28	0.78	0.04066	10.31	0.306286
3/29/2018 12:45:00 PM.000	1106	0.95	1.24	0.86	0.03691	10.31	0.281178
3/29/2018 12:50:00 PM.000	1116.1	1.65	1.09	0.84	0.04825	10.31	0.60081
3/29/2018 12:55:00 PM.000	1122.1	2.02	0.6	1.13	0.06639	10.3075	0.836364
3/29/2018 1:00:00 PM.000	1115.3	1.05	0.45	1.22	0.06598	10.3025	0.349732
3/29/2018 1:05:00 PM.000	1099.9	0.15	0.31	1.62	0.10247	10.3	0.0368096
3/29/2018 1:10:00 PM.000	1101.5	0.06	0.14	1.84	0.14451	10.295	0.229155
3/29/2018 1:15:00 PM.000	1120.6	0.05	0.13	1.86	0.12456	10.29	0.197435
3/29/2018 1:20:00 PM.000	1109.5	0.05	0.37	1.68	0.15893	10.285	0.252006
3/29/2018 1:25:00 PM.000	819.1	0.05	0.88	1.4	0.16524	10.28	0.261998
3/29/2018 1:30:00 PM.000	590.1	0.05	1.01	1.15	0.08892	10.275	0.140767
3/29/2018 1:35:00 PM.000	553	0.07	1.23	0.96	0.0742	10.2725	0.117384
3/29/2018 1:40:00 PM.000	544.2	0.17	1.64	0.85	0.07247	10.2675	0.163854
3/29/2018 1:45:00 PM.000	579.3	0.45	1.7	0.87	0.01141	10.265	0.0901939
3/29/2018 1:50:00 PM.000	978.2	1.17	1.71	0.96	0.01839	10.2575	0.184294
3/29/2018 1:55:00 PM.000	1133.1	1.55	1.9	1.06	0.04639	10.2575	0.478151
3/29/2018 2:00:00 PM.000	1182	1.19	1.7	1.11	0.02778	10.25	0.227497
3/29/2018 2:05:00 PM.000	1174.9	0.75	1.14	1.12	0.04847	10.2475	0.241154
3/29/2018 2:10:00 PM.000	1146.2	0.71	0.92	1.23	0.07484	10.2475	0.352919
3/29/2018 2:15:00 PM.000	1166.5	0.15	0.93	1.4	0.12578	10.24	0.329338
3/29/2018 2:20:00 PM.000	1140.6	0.06	0.63	1.5	0.15898	10.24	0.251816
3/29/2018 2:25:00 PM.000	1163.4	0.05	0.55	1.43	0.18289	10.235	0.28972
3/29/2018 2:30:00 PM.000	1167.8	0.05	0.78	1.23	0.20575	10.2325	0.325969
3/29/2018 2:35:00 PM.000	1141.7	0.05	1.26	1.03	0.2064	10.2325	0.327
3/29/2018 2:40:00 PM.000	1138.4	0.05	1.55	0.88	0.0942	10.2325	0.149001
3/29/2018 2:45:00 PM.000	1123	0.13	1.74	0.67	0.0015	10.23	0.00193746
3/29/2018 2:50:00 PM.000	1090.5	0.35	2.11	0.53	0	10.2275	0
3/29/2018 2:55:00 PM.000	1116.7	0.46	2.41	0.4	0	10.2275	0
3/29/2018 3:00:00 PM.000	1130.5	0.75	2.59	0.46	6e-05	10.2275	0.000450555
3/29/2018 3:05:00 PM.000	1090.1	0.81	2.84	0.51	0.00727	10.225	0.0552134
3/29/2018 3:10:00 PM.000	1110.8	0.84	2.85	0.64	0.02026	10.2225	0.193818
3/29/2018 3:15:00 PM.000	1129	1.16	2.45	0.86	0.04261	10.22	0.435783
3/29/2018 3:20:00 PM.000	1133.7	1.17	2.12	0.8	0.05373	10.2225	0.457761
3/29/2018 3:25:00 PM.000	1151.2	0.76	2.09	0.87	0.07114	10.2175	0.593823
3/29/2018 3:30:00 PM.000	1156.3	0.79	1.82	0.89	0.09898	10.22	0.809731
3/29/2018 3:35:00 PM.000	1176.3	1.13	1.38	1.3	0.11463	10.2175	1.25401
3/29/2018 3:40:00 PM.000	1174.9	1.78	1.31	1.52	0.11966	10.2175	1.23302
3/29/2018 3:45:00 PM.000	1129.9	0.85	1.15	1.83	0.14354	10.2175	1.14768
3/29/2018 3:50:00 PM.000	1130.1	0.09	0.72	2.16	0.1857	10.22	0.153258
3/29/2018 3:55:00 PM.000	1037	0.06	0.52	2.14	0.22141	10.22	0.350709
3/29/2018 4:00:00 PM.000	984.7	0.06	0.85	1.96	0.26424	10.2175	0.418611
3/29/2018 4:05:00 PM.000	1048.6	0.05	1.37	1.55	0.30235	10.2175	0.479049
3/29/2018 4:10:00 PM.000	1048.7	0.05	1.5	1.41	0.31826	10.2175	0.50428
3/29/2018 4:15:00 PM.000	1111.4	0.05	1.78	1.11	0.33633	10.2175	0.532937
3/29/2018 4:20:00 PM.000	1121.9	0.12	2.24	0.82	0.32556	10.2175	0.515857
3/29/2018 4:25:00 PM.000	1118.9	0.76	2.48	0.59	0.286	10.2125	1.34915
3/29/2018 4:30:00 PM.000	1109.2	1.38	2.7	0.37	0.27972	10.2125	2.8154
3/29/2018 4:35:00 PM.000	1039.7	1.77	2.99	0.69	0.27583	10.2125	3.23997
3/29/2018 4:40:00 PM.000	1064.3	1.11	3	0.88	0.275	10.215	2.15004
3/29/2018 4:45:00 PM.000	1073.4	0.82	2.31	1.34	0.27955	10.2125	1.318
3/29/2018 4:50:00 PM.000	997.3	0.67	1.88	1.45	0.30227	10.215	1.33315
3/29/2018 4:55:00 PM.000	966.3	0.55	1.95	1.81	0.31966	10.215	2.18721
3/29/2018 5:00:00 PM.000	875.8	0.12	1.73	1.97	0.38382	10.2125	1.65498
3/29/2018 5:05:00 PM.000	1047.4	0.06	1.31	1.91	0.42475	10.2125	0.673081
3/29/2018 5:10:00 PM.000	1036.5	0.05	1.48	1.73	0.44042	10.2125	0.697929
3/29/2018 5:15:00 PM.000	1029.2	0.05	1.64	1.53	0.46656	10.2125	0.739379
3/29/2018 5:20:00 PM.000	1033.2	0.05	1.86	1.34	0.49202	10.2125	0.779751
3/29/2018 5:25:00 PM.000	984	0.05	2.38	1.09	0.49012	10.2125	0.776738
3/29/2018 5:30:00 PM.000	1004.9	0.07	2.53	0.82	0.45915	10.21	0.727586
3/29/2018 5:35:00 PM.000	1012.2	0.23	2.7	0.65	0.44217	10.21	1.49006
3/29/2018 5:40:00 PM.000	1029.3	0.53	3.13	0.55	0.41226	10.205	3.08985
3/29/2018 5:45:00 PM.000	1060.4	0.74	3.32	0.59	0.35411	10.2075	2.71393
3/29/2018 5:50:00 PM.000	1079	0.64	3.35	0.76	0.36572	10.2075	3.00856
3/29/2018 5:55:00 PM.000	1099.8	0.81	3.41	0.8	0.3821	10.205	3.89243
3/29/2018 6:00:00 PM.000	1065.8	1.15	3.57	0.79	0.35696	10.2025	3.83569
3/29/2018 6:05:00 PM.000	1011.3	1.72	3.51	0.74	0.33478	10.2025	3.84678
3/29/2018 6:10:00 PM.000	1021.6	1.56	3.47	0.9	0.36316	10.2	3.30625
3/29/2018 6:15:00 PM.000	984	1.04	3.37	1.31	0.36123	10.2	2.6699
3/29/2018 6:20:00 PM.000	1003	0.97	2.71	1.69	0.35652	10.2	1.99439
3/29/2018 6:25:00 PM.000	981.7	0.59	2.38	1.96	0.39039	10.1975	1.84441
3/29/2018 6:30:00 PM.000	985.6	0.84	2.44	2.06	0.41494	10.1975	3.3788
3/29/2018 6:35:00 PM.000	936.4	1.03	2.16	2.17	0.41776	10.1975	4.05288
3/29/2018 6:40:00 PM.000	949.2	0.91	1.74	2.19	0.43158	10.1975	3.70621
3/29/2018 6:45:00 PM.000	1011.5	0.87	1.67	2.4	0.45121	10.1975	3.78361
3/29/2018 6:50:00 PM.000	1017.7	0.76	1.52	2.5	0.46203	10.195	3.37196
3/29/2018 6:55:00 PM.000	1032.2	0.13	1.17	2.85	0.51251	10.1925	0.199585
3/29/2018 7:00:00 PM.000	1051.3	0.06	0.98	2.74	0.55731	10.195	0.882914
3/29/2018 7:05:00 PM.000	1089.8	0.06	1.08	2.5	0.59541	10.195	0.943304
3/29/2018 7:10:00 PM.000	1118	0.05	1.29	2.01	0.57716	10.1925	0.914323
3/29/2018 7:15:00 PM.000	1120.1	0.05	1.31	1.68	0.57291	10.19	0.907533
3/29/2018 7:20:00 PM.000	1122.3	0.05	1.2	1.57	0.58659	10.185	0.929103
3/29/2018 7:25:00 PM.000	1108.7	0.17	1.2	1.4	0.64723	10.1775	5.61058
3/29/2018 7:30:00 PM.000	1121.8	0.47	2.71	1.2	0.65244	10.17	7.29131
3/29/2018 7:35:00 PM.000	1177.1	0.86	3.51	1.27	0.61928	10.1675	8.20828
3/29/2018 7:40:00 PM.000	1206.8	1.45	2.71	1.23	0.56094	10.1675	8.90637
3/29/2018 7:45:00 PM.000	1152.9	1.35	2.1	1.45	0.55654	10.1675	6.98687
3/29/2018 7:50:00 PM.000	1053.8	1.03	2.74	1.25	0.5614	10.1575	5.79673
3/29/2018 7:55:00 PM.000	959.5	1.46	2.82	1.8	0.5152	10.1575	6.0718
3/29/2018 8:00:00 PM.000	985.9	1.92	2.28	1.86	0.486	10.16	7.24247
3/29/2018 8:05:00 PM.000	983.8	1.86	2.21	2.17	0.47272	10.155	6.66806
3/29/2018 8:10:00 PM.000	985.5	1.03	2.49	2.34	0.46937	10.1525	3.87853
3/29/2018 8:15:00 PM.000	954.5	0.5	2.1	2.66	0.46313	10.1525	2.02846
3/29/2018 8:20:00 PM.000	999	0.7	1.87	2.73	0.47315	10.145	3.55273
3/29/2018 8:25:00 PM.000	1011.2	1.12	2.28	2.75	0.47459	10.14	5.70737
3/29/2018 8:30:00 PM.000	1046.3	1.46	2.26	2.85	0.45762	10.1375	4.97595
3/29/2018 8:35:00 PM.000	1070.4	1.06	1.96	3.03	0.45108	10.13	3.32872
3/29/2018 8:40:00 PM.000	1158.2	0.59	2.01	2.97	0.46498	10.13	2.09945
3/29/2018 8:45:00 PM.000	1187.7	0.43	2.08	3.09	0.4795	10.13	2.40455
3/29/2018 8:50:00 PM.000	1177.7	0.55	2.04	3.27	0.48792	10.1275	3.20192
3/29/2018 8:55:00 PM.000	1204.1	1.06	2.04	3.37	0.48352	10.1225	5.16569
3/29/2018 9:00:00 PM.000	1257.2	1.49	2.04	3.07	0.47823	10.1175	5.5166
3/29/2018 9:05:00 PM.000	1198.4	1.22	2.04	2.93	0.46497	10.1175	4.03706
3/29/2018 9:10:00 PM.000	1200.2	0.62	2.04	3.11	0.47726	10.1125	2.60112
3/29/2018 9:15:00 PM.000	1175.3	0.56	2.04	3.39	0.48619	10.11	2.62024
3/29/2018 9:20:00 PM.000	1166.8	0.61	2.07	3.53	0.49576	10.1075	2.9954
3/29/2018 9:25:00 PM.000	1177.8	0.68	2.03	3.41	0.50406	10.1025	3.79624
3/29/2018 9:30:00 PM.000	1187.3	0.89	2.09	3.29	0.50432	10.0975	5.48053
3/29/2018 9:35:00 PM.000	1283.6	1.37	2.19	3.49	0.49417	10.0975	5.9805
3/29/2018 9:40:00 PM.000	1305.9	1.33	2.14	3.58	0.48367	10.09	4.77868
3/29/2018 9:45:00 PM.000	1284.5	0.8	2.03	3.75	0.49001	10.0875	3.00111
3/29/2018 9:50:00 PM.000	1244.8	0.47	2.04	3.57	0.50577	10.085	2.8125
3/29/2018 9:55:00 PM.000	1223.1	0.11	2.02	3.57	0.55992	10.08	1.72403
3/29/2018 10:00:00 PM.000	1203.3	0.06	2.07	3.72	0.6176	10.0775	0.975751
3/29/2018 10:05:00 PM.000	1154.3	0.06	2.2	3.58	0.65848	10.0675	1.04012
3/29/2018 10:10:00 PM.000	1163.2	0.06	2.49	3.17	0.73516	10.05	1.16081
3/29/2018 10:15:00 PM.000	1192.8	0.06	2.72	2.59	0.77072	10.04	1.21669
3/29/2018 10:20:00 PM.000	1245.5	0.06	2.75	2.26	0.80086	10.025	1.26384
3/29/2018 10:25:00 PM.000	1411.6	0.06	2.5	2.16	0.74657	10.02	1.178
3/29/2018 10:30:00 PM.000	1319.4	0.06	2.15	2.12	0.59318	10.0075	0.935597
3/29/2018 10:35:00 PM.000	1351.1	0.06	2.08	1.9	0.51041	9.9925	0.804699
3/29/2018 10:40:00 PM.000	1306.2	0.06	2.14	1.66	0.56761	9.9825	0.894716
3/29/2018 10:45:00 PM.000	1226.9	0.06	2.16	1.33	0.60801	9.98	0.958373
3/29/2018 10:50:00 PM.000	1247.1	0.05	2.18	1.17	0.6152	9.975	0.969596
3/29/2018 10:55:00 PM.000	1358.9	0.08	2.24	1.06	0.6309	10.01	0.995178
3/29/2018 11:00:00 PM.000	822.9	0.62	2.37	1	0.7	10.0275	4.78832
3/29/2018 11:05:00 PM.000	867.5	1.51	3.23	1	0.83222	10.035	9.05551
3/29/2018 11:10:00 PM.000	884.2	1.56	3.49	1.12	0.76967	10.0375	8.62139
3/29/2018 11:15:00 PM.000	914.6	1.03	2.44	1.39	0.6339	10.035	5.18983
3/29/2018 11:20:00 PM.000	910.1	0.83	2.31	1.54	0.67931	10.035	3.9435
3/29/2018 11:25:00 PM.000	978.6	0.77	2.36	1.73	0.72257	10.0375	3.21135
3/29/2018 11:30:00 PM.000	883	0.11	2.39	1.9	0.70709	10.0375	1.41843
3/29/2018 11:35:00 PM.000	887.5	0.06	2.09	2	0.67824	10.0425	1.07071
3/29/2018 11:40:00 PM.000	966.7	0.06	2.18	1.75	0.6674	10.0375	1.05347
3/29/2018 11:45:00 PM.000	1004.3	0.06	2.35	1.22	0.70673	10.0375	1.11557
3/29/2018 11:50:00 PM.000	971	0.06	2.64	0.79	0.7373	10.035	1.16378
3/29/2018 11:55:00 PM.000	1007.1	0.05	2.77	0.67	0.75365	10.0375	1.18967
3/30/2018 12:00:00 AM.000	1047.6	0.05	2.7	0.68	0.76171	10.04	1.20246
3/30/2018 12:05:00 AM.000	1136.9	0.05	2.37	0.7	0.76388	10.0375	1.20582
3/30/2018 12:10:00 AM.000	1253	0.05	2.19	0.56	0.76117	10.0375	1.20154
3/30/2018 12:15:00 AM.000	1300.9	0.05	2.18	0.4	0.73805	10.0325	1.16489
3/30/2018 12:20:00 AM.000	1301.3	0.05	2.27	0.36	0.7105	10.03	1.12133
3/30/2018 12:25:00 AM.000	1328	0.05	2.32	0.23	0.69614	10.03	1.09865
3/30/2018 12:30:00 AM.000	1467.8	0.05	2.28	0.34	0.65427	10.03	1.03255
3/30/2018 12:35:00 AM.000	1384.8	0.05	2.17	0.28	0.58841	10.03	0.928565
3/30/2018 12:40:00 AM.000	1332.8	0.05	2.13	0.27	0.50955	10.0275	0.80401
3/30/2018 12:45:00 AM.000	1253.6	0.05	2.19	0.15	0.45431	10.025	0.716757
3/30/2018 12:50:00 AM.000	780.3	0.05	2.25	0.21	0.40807	10.0225	0.643722
3/30/2018 12:55:00 AM.000	586.3	0.05	2.25	0.32	0.39376	10.0225	0.621133
3/30/2018 1:00:00 AM.000	607.3	0.05	2.16	0.28	0.38673	10.02	0.609999
3/30/2018 1:05:00 AM.000	593.3	0.05	2.15	0.28	0.38918	10.0175	0.61383
3/30/2018 1:10:00 AM.000	693.2	0.05	2.2	0.39	0.40258	10.02	0.635018
3/30/2018 1:15:00 AM.000	1187.9	0.05	2.17	0.57	0.4222	10.015	0.665909
3/30/2018 1:20:00 AM.000	1447.6	0.06	2.13	0.59	0.5072	10.005	0.799873
3/30/2018 1:25:00 AM.000	1672.6	0.06	2.14	0.46	0.52809	9.9925	0.832588
3/30/2018 1:30:00 AM.000	1713.7	0.06	2.11	0.44	0.51212	9.9875	0.807301
3/30/2018 1:35:00 AM.000	1588	0.05	2.1	0.47	0.25995	9.9725	0.409419
3/30/2018 1:40:00 AM.000	1436.7	0.05	2.11	0.53	0.13106	9.9625	0.20615
3/30/2018 1:45:00 AM.000	1400.5	0.05	2.08	0.6	0.08353	9.965	0.131235
3/30/2018 1:50:00 AM.000	1375.1	0.05	2.03	0.71	0.0832	9.9575	0.130691
3/30/2018 1:55:00 AM.000	1421.4	0.06	1.96	0.8	0.04551	9.9525	0.0712785
3/30/2018 2:00:00 AM.000	1373.5	0.05	1.98	0.75	0.01468	9.9425	0.0226866
3/30/2018 2:05:00 AM.000	1134	0.06	2.45	0.61	0.00061	9.94	0.00343755
3/30/2018 2:10:00 AM.000	1090.3	0.17	3.25	0.36	6e-05	9.9275	0.000713678
3/30/2018 2:15:00 AM.000	1027.4	0.96	5.11	0.25	0.11876	9.93	1.97019
3/30/2018 2:20:00 AM.000	1106.9	0.59	7.49	0.39	0.0889	9.96	0.979899
3/30/2018 2:25:00 AM.000	1083.7	0.84	6.01	0.61	0.04975	9.96	0.627603
3/30/2018 2:30:00 AM.000	1095.5	1.25	3.74	0.8	0.05802	9.9625	0.885436
3/30/2018 2:35:00 AM.000	1004.6	1.86	4.14	0.78	0.13372	9.9625	1.97009
3/30/2018 2:40:00 AM.000	931.6	1.9	4.82	0.92	0.10051	9.9575	1.35071
3/30/2018 2:45:00 AM.000	931.1	1.4	3.74	1.27	0.08943	9.96	0.921017
3/30/2018 2:50:00 AM.000	936	0.86	2.87	1.5	0.14638	9.96	1.63577
3/30/2018 2:55:00 AM.000	949.4	1.04	3.51	1.78	0.16482	9.9625	1.90472
3/30/2018 3:00:00 AM.000	1016.6	1.46	3.17	1.88	0.16841	9.9575	2.04796
3/30/2018 3:05:00 AM.000	1025	1.83	2.19	2.4	0.19963	9.9575	2.49564
3/30/2018 3:10:00 AM.000	1041.4	1.59	2.46	2.71	0.2124	9.9575	1.81045
3/30/2018 3:15:00 AM.000	1076.6	0.37	2.41	2.99	0.25483	9.955	0.713624
3/30/2018 3:20:00 AM.000	1067.2	0.07	1.48	3.12	0.32495	9.955	0.0563726
3/30/2018 3:25:00 AM.000	1102.4	0.06	1.44	3.07	0.36577	9.9525	0.575991
3/30/2018 3:30:00 AM.000	1098.5	0.06	1.87	2.91	0.41261	9.9475	0.649731
3/30/2018 3:35:00 AM.000	1076.3	0.06	1.89	2.42	0.46116	9.945	0.726191
3/30/2018 3:40:00 AM.000	1098.9	0.06	2.05	2.16	0.49763	9.9425	0.783609
3/30/2018 3:45:00 AM.000	1122.8	0.05	2.44	2.04	0.52266	9.94	0.822997
3/30/2018 3:50:00 AM.000	1131.7	0.05	2.51	2.12	0.54081	9.94	0.851592
3/30/2018 3:55:00 AM.000	1158.7	0.05	2.54	1.89	0.53762	9.9375	0.846516
3/30/2018 4:00:00 AM.000	1152.4	0.05	2.88	1.46	0.51297	9.9325	0.807587
3/30/2018 4:05:00 AM.000	1157.4	0.09	3.06	0.88	0.46353	9.93	0.729665
3/30/2018 4:10:00 AM.000	1123.1	0.53	3.16	0.6	0.42278	9.9275	1.6089
3/30/2018 4:15:00 AM.000	1077.5	0.63	3.41	0.59	0.42563	9.925	4.06147
3/30/2018 4:20:00 AM.000	1086.2	0.59	3.59	0.56	0.41171	9.92	3.88103
3/30/2018 4:25:00 AM.000	1012.9	0.7	3.43	0.79	0.41345	9.9175	3.9327
3/30/2018 4:30:00 AM.000	1025.4	0.99	3.05	0.77	0.4262	9.9175	4.59921
3/30/2018 4:35:00 AM.000	1071.9	1.23	3.08	0.99	0.42632	9.915	4.91527
3/30/2018 4:40:00 AM.000	1056.7	1.81	2.9	1.21	0.4137	9.91	5.45361
3/30/2018 4:45:00 AM.000	1034.3	1.91	2.48	1.57	0.4163	9.91	4.59932
3/30/2018 4:50:00 AM.000	1046.6	0.78	2.2	1.82	0.42997	9.905	2.27914
3/30/2018 4:55:00 AM.000	1050.5	0.58	1.99	2.11	0.43703	9.9025	1.88741
3/30/2018 5:00:00 AM.000	1061.6	0.52	1.68	2.24	0.46377	9.8975	2.32798
3/30/2018 5:05:00 AM.000	1052.5	0.61	1.5	2.25	0.4822	9.8975	2.40111
3/30/2018 5:10:00 AM.000	1047.7	0.5	1.48	2.27	0.49913	9.895	3.5676
3/30/2018 5:15:00 AM.000	1034.9	0.08	1.3	2.38	0.5533	9.8925	0.837068
3/30/2018 5:20:00 AM.000	1054.7	0.06	1.09	2.36	0.58578	9.8875	0.921292
3/30/2018 5:25:00 AM.000	1028.4	0.06	1.22	2.13	0.61352	9.8875	0.964942
3/30/2018 5:30:00 AM.000	1026.5	0.05	1.6	1.97	0.64856	9.885	1.02002
3/30/2018 5:35:00 AM.000	1034.6	0.05	1.74	1.99	0.66499	9.8825	1.04581
3/30/2018 5:40:00 AM.000	1062.4	0.05	1.84	1.78	0.68033	9.8775	1.06981
3/30/2018 5:45:00 AM.000	1056.1	0.05	2.13	1.5	0.66943	9.8775	1.05267
3/30/2018 5:50:00 AM.000	1133	0.05	2.31	1.13	0.61907	9.8725	0.973328
3/30/2018 5:55:00 AM.000	1078.2	0.2	2.4	1.01	0.57698	9.8675	0.907015
3/30/2018 6:00:00 AM.000	1104.3	0.69	2.7	0.64	0.54045	9.865	3.68725
3/30/2018 6:05:00 AM.000	1051.7	1.16	3	0.66	0.50297	9.865	5.29571
3/30/2018 6:10:00 AM.000	1034.7	1.63	2.98	0.66	0.44157	9.865	4.05028
3/30/2018 6:15:00 AM.000	1009.6	1.05	2.99	1.11	0.47946	9.865	3.05793
3/30/2018 6:20:00 AM.000	1000.4	0.66	2.94	1.35	0.48337	9.8625	2.88258
3/30/2018 6:25:00 AM.000	1016.5	0.65	2.72	1.64	0.46467	9.86	2.57617
3/30/2018 6:30:00 AM.000	1020.8	0.68	2.3	1.71	0.49226	9.8525	2.94466
3/30/2018 6:35:00 AM.000	1062	0.82	2.23	1.75	0.51498	9.8525	3.39187
3/30/2018 6:40:00 AM.000	1068.7	0.94	2.22	1.71	0.50633	9.8475	3.56493
3/30/2018 6:45:00 AM.000	1044.8	0.86	1.84	1.75	0.5149	9.8475	3.24436
3/30/2018 6:50:00 AM.000	1037.2	0.76	1.62	1.74	0.53974	9.8425	3.70954
3/30/2018 6:55:00 AM.000	1053.2	1.03	1.59	1.95	0.54036	9.8425	5.07997
3/30/2018 7:00:00 AM.000	1045.1	1.84	1.37	2.14	0.5215	9.8375	6.97238
3/30/2018 7:05:00 AM.000	998.4	1.69	1.09	2.33	0.52371	9.8375	5.79238
3/30/2018 7:10:00 AM.000	993.4	0.35	0.94	2.56	0.54935	9.835	2.03518
3/30/2018 7:15:00 AM.000	986.8	0.07	0.71	2.83	0.58683	9.8275	0.921631
3/30/2018 7:20:00 AM.000	811.6	0.06	0.55	3.06	0.62116	9.825	0.975515
3/30/2018 7:25:00 AM.000	611.7	0.06	0.67	2.75	0.66328	9.82	1.04157
3/30/2018 7:30:00 AM.000	584.5	0.06	1.06	2.45	0.69538	9.82	1.092
3/30/2018 7:35:00 AM.000	575.2	0.06	1.2	2.11	0.71825	9.82	1.12793
3/30/2018 7:40:00 AM.000	581	0.06	1.21	1.83	0.74239	9.8175	1.16578
3/30/2018 7:45:00 AM.000	566	0.05	1.49	1.72	0.75114	9.815	1.17946
3/30/2018 7:50:00 AM.000	558.2	0.05	1.64	1.6	0.73037	9.815	1.14683
3/30/2018 7:55:00 AM.000	578.8	0.05	1.63	1.53	0.70904	9.8125	1.11326
3/30/2018 8:00:00 AM.000	569.5	0.05	1.85	1.2	0.68562	9.81	1.07641
3/30/2018 8:05:00 AM.000	558.2	0.05	2.03	0.85	0.63598	9.81	0.998445
3/30/2018 8:10:00 AM.000	554.5	0.2	2.07	0.69	0.59578	9.81	0.600209
3/30/2018 8:15:00 AM.000	572.4	0.48	2.19	0.58	0.57801	9.805	3.70804
3/30/2018 8:20:00 AM.000	583.5	0.96	2.36	0.68	0.56037	9.805	4.24216
3/30/2018 8:25:00 AM.000	565.2	1.01	2.31	0.77	0.53314	9.805	3.45922
3/30/2018 8:30:00 AM.000	576.8	0.41	2.03	0.78	0.55314	9.805	2.06627
3/30/2018 8:35:00 AM.000	575.7	0.39	1.83	0.93	0.56793	9.805	3.27659
3/30/2018 8:40:00 AM.000	574	0.78	1.77	1.01	0.5478	9.805	4.62182
3/30/2018 8:45:00 AM.000	549	1.17	1.6	1.14	0.56073	9.805	6.4889
3/30/2018 8:50:00 AM.000	550	1.77	1.49	1.27	0.55616	9.805	6.47656
3/30/2018 8:55:00 AM.000	554.4	1.5	1.48	1.47	0.53354	9.805	4.27745
3/30/2018 9:00:00 AM.000	549.3	0.62	1.48	1.86	0.53914	9.805	2.53988
3/30/2018 9:05:00 AM.000	550.2	0.6	1.48	2.23	0.55769	9.8075	2.54183
3/30/2018 9:10:00 AM.000	560.4	0.78	1.48	2.28	0.55466	9.81	2.72649
3/30/2018 9:15:00 AM.000	562.8	1.16	1.48	2.39	0.55446	9.8075	4.41877
3/30/2018 9:20:00 AM.000	555.5	1.72	1.1	2.47	0.54741	9.81	4.69016
3/30/2018 9:25:00 AM.000	557.4	1.25	0.32	2.74	0.53936	9.81	2.40802
3/30/2018 9:30:00 AM.000	552.7	0.25	0.2	2.94	0.54942	9.815	0.726149
3/30/2018 9:35:00 AM.000	563.2	0.06	0.12	2.92	0.56398	9.815	0.885465
3/30/2018 9:40:00 AM.000	573.2	0.06	0.1	2.81	0.56567	9.815	0.88812
3/30/2018 9:45:00 AM.000	555.4	0.06	0.18	2.45	0.58266	9.8225	0.91497
3/30/2018 9:50:00 AM.000	548.8	0.06	0.41	2.25	0.57138	9.825	0.897302
3/30/2018 9:55:00 AM.000	569.4	0.06	0.5	2.07	0.54903	9.825	0.862186
3/30/2018 10:00:00 AM.000	579.8	0.05	0.66	1.94	0.5425	9.8275	0.851976
3/30/2018 10:05:00 AM.000	547.3	0.05	0.9	1.72	0.52105	9.835	0.818418
3/30/2018 10:10:00 AM.000	549.4	0.05	1.02	1.44	0.49128	9.835	0.771633
3/30/2018 10:15:00 AM.000	560.6	0.05	1.15	1.24	0.47208	9.8375	0.741503
3/30/2018 10:20:00 AM.000	523.2	0.05	1.37	1.13	0.44619	9.8425	0.700896
3/30/2018 10:25:00 AM.000	220.8	0.08	1.5	1.2	0.41466	9.8475	0.31156
3/30/2018 10:30:00 AM.000	252.9	0.29	1.6	1.13	0.40332	9.85	2.11718
3/30/2018 10:35:00 AM.000	589.1	0.52	1.81	1.03	0.40196	9.85	3.81222
3/30/2018 10:40:00 AM.000	918.9	0.66	1.84	0.98	0.39476	9.855	3.22019
3/30/2018 10:45:00 AM.000	962.3	1.27	1.52	0.94	0.39549	9.86	4.22984
3/30/2018 10:50:00 AM.000	935.2	1.61	1.42	1.23	0.39665	9.865	4.24078
3/30/2018 10:55:00 AM.000	926.9	1.13	1.31	1.42	0.39278	9.8675	3.39223
3/30/2018 11:00:00 AM.000	913.6	0.15	0.86	1.92	0.44592	9.8725	1.11977
3/30/2018 11:05:00 AM.000	618.9	0.06	0.59	1.73	0.49126	9.8775	0.77238
3/30/2018 11:10:00 AM.000	387.7	0.06	0.64	1.59	0.5044	9.8825	0.793145
3/30/2018 11:15:00 AM.000	416.8	0.06	0.65	1.28	0.52835	9.89	0.830974
3/30/2018 11:20:00 AM.000	523.2	0.05	0.73	1.26	0.54321	9.8925	0.854409
3/30/2018 11:25:00 AM.000	525.3	0.05	1.08	1	0.53093	9.8925	0.835084
3/30/2018 11:30:00 AM.000	546.3	0.05	1.14	0.86	0.49861	9.895	0.784268
3/30/2018 11:35:00 AM.000	550.7	0.21	1.19	0.65	0.47699	9.9	0.658523
3/30/2018 11:40:00 AM.000	557	0.64	1.53	0.67	0.40933	9.9	2.97541
3/30/2018 11:45:00 AM.000	602	1.37	1.63	0.56	0.36533	9.9	2.9788
3/30/2018 11:50:00 AM.000	974.2	1.34	1.5	0.76	0.36313	9.9025	2.48507
3/30/2018 11:55:00 AM.000	1162.7	0.79	1.44	0.73	0.39643	9.9075	2.06316
3/30/2018 12:00:00 PM.000	1140.1	0.54	1.16	1.14	0.40121	9.91	1.40558
3/30/2018 12:05:00 PM.000	964.6	0.26	0.79	1.36	0.38962	9.92	0.949408
3/30/2018 12:10:00 PM.000	839.6	0.15	0.68	1.51	0.4627	9.9225	1.51002
3/30/2018 12:15:00 PM.000	749.9	0.06	0.73	1.32	0.50577	9.925	0.796103
3/30/2018 12:20:00 PM.000	387.9	0.06	0.53	0.87	0.51015	9.935	0.803192
3/30/2018 12:25:00 PM.000	289.4	0.05	0.56	0.77	0.53772	9.94	0.846723
3/30/2018 12:30:00 PM.000	276.9	0.05	0.68	0.61	0.53608	9.945	0.84424
3/30/2018 12:35:00 PM.000	266.9	0.05	0.67	0.5	0.45825	9.955	0.721777
3/30/2018 12:40:00 PM.000	268.3	0.05	0.89	0.32	0.31317	9.965	0.493242
3/30/2018 12:45:00 PM.000	288.6	0.05	1.08	0.17	0.07513	9.9675	0.118
3/30/2018 12:50:00 PM.000	685.3	0.18	1.05	0.49	0.00141	9.975	0.00125693
3/30/2018 12:55:00 PM.000	862	0.33	1.19	0.73	0	9.9775	0
3/30/2018 1:00:00 PM.000	981.6	0.65	1.42	0.84	0	9.985	0
3/30/2018 1:05:00 PM.000	1153.5	1.31	1.41	0.64	0.00313	9.995	0.0297339
3/30/2018 1:10:00 PM.000	1153.7	1.43	1.49	0.86	0.0084	10	0.0685811
3/30/2018 1:15:00 PM.000	1168.4	0.66	1.41	1.02	0.02624	10.01	0.152083
3/30/2018 1:20:00 PM.000	1170.8	0.61	0.85	1.13	0.05717	10.0175	0.208711
3/30/2018 1:25:00 PM.000	1160.1	0.61	0.62	0.88	0.07944	10.025	0.289372
3/30/2018 1:30:00 PM.000	1144	0.1	0.7	0.91	0.14714	10.035	0.196151
3/30/2018 1:35:00 PM.000	1152.1	0.06	0.51	0.9	0.167	10.0375	0.263271
3/30/2018 1:40:00 PM.000	1145.2	0.05	0.38	0.94	0.175	10.045	0.275954
3/30/2018 1:45:00 PM.000	1135	0.05	0.63	1.05	0.18375	10.055	0.289842
3/30/2018 1:50:00 PM.000	1118.7	0.05	1.2	1.1	0.10925	10.065	0.17219
3/30/2018 1:55:00 PM.000	789.4	0.05	1.35	1.1	0.00091	10.065	0.000995434
3/30/2018 2:00:00 PM.000	589.6	0.05	1.56	0.82	0	10.075	-0.000442481
3/30/2018 2:05:00 PM.000	540.7	0.05	2.02	0.71	0	10.0825	-0.000442461
3/30/2018 2:10:00 PM.000	544.5	0.21	2.28	0.55	0	10.085	0
3/30/2018 2:15:00 PM.000	599.3	0.45	2.35	0.35	0	10.095	0
3/30/2018 2:20:00 PM.000	1060.3	0.84	2.59	0.36	0.00023	10.0975	0.0020965
3/30/2018 2:25:00 PM.000	1277.4	1.49	2.69	0.42	0.01267	10.105	0.148845
3/30/2018 2:30:00 PM.000	1223.8	1.43	2.26	1.08	0.02265	10.115	0.214744
3/30/2018 2:35:00 PM.000	1188.4	1.06	1.91	1.3	0.03914	10.1225	0.269989
3/30/2018 2:40:00 PM.000	1162.8	0.66	1.83	1.56	0.06186	10.1275	0.341235
3/30/2018 2:45:00 PM.000	1138.7	0.67	1.47	1.2	0.08633	10.135	0.41278
3/30/2018 2:50:00 PM.000	1131.4	1.2	1.1	1.31	0.10603	10.14	0.734278
3/30/2018 2:55:00 PM.000	1118.3	0.87	1.06	1.22	0.1219	10.15	0.897716
3/30/2018 3:00:00 PM.000	1150.1	0.1	0.86	1.55	0.17574	10.1575	0.268985
3/30/2018 3:05:00 PM.000	1106.2	0.06	0.54	1.44	0.20566	10.1625	0.325285
3/30/2018 3:10:00 PM.000	728.1	0.05	0.63	1.52	0.23358	10.17	0.369571
3/30/2018 3:15:00 PM.000	585.4	0.05	1.25	1.31	0.27477	10.1775	0.434897
3/30/2018 3:20:00 PM.000	562	0.05	1.57	1.07	0.28159	10.18	0.445729
3/30/2018 3:25:00 PM.000	562.7	0.06	1.61	0.87	0.27361	10.19	0.433188
3/30/2018 3:30:00 PM.000	621.5	0.22	1.88	0.74	0.27018	10.1925	0.822602
3/30/2018 3:35:00 PM.000	1008.7	0.81	2.17	0.54	0.24637	10.2	2.32055
3/30/2018 3:40:00 PM.000	1145.5	1.46	2.18	0.5	0.22885	10.2	2.18477
3/30/2018 3:45:00 PM.000	1157	1.59	2.19	0.52	0.24043	10.21	2.00527
3/30/2018 3:50:00 PM.000	1143.2	0.97	2.21	1	0.25219	10.21	1.4492
3/30/2018 3:55:00 PM.000	1165.5	0.55	1.78	1.35	0.25807	10.22	1.32037
3/30/2018 4:00:00 PM.000	1170.2	0.68	1.15	1.6	0.2803	10.2225	1.58793
3/30/2018 4:05:00 PM.000	1109.6	0.43	1.2	1.84	0.3152	10.23	1.90879
3/30/2018 4:10:00 PM.000	1111.4	0.07	1.13	1.84	0.37889	10.2375	0.520227
3/30/2018 4:15:00 PM.000	1114.7	0.06	0.74	1.82	0.40827	10.24	0.647371
3/30/2018 4:20:00 PM.000	1082	0.05	0.81	1.47	0.42604	10.2475	0.675688
3/30/2018 4:25:00 PM.000	1094.2	0.05	1	1.44	0.44752	10.25	0.709819
3/30/2018 4:30:00 PM.000	1092.4	0.05	1.11	1.21	0.45831	10.255	0.72703
3/30/2018 4:35:00 PM.000	927.4	0.05	1.75	1.31	0.444	10.2575	0.704358
3/30/2018 4:40:00 PM.000	633.3	0.05	2.05	1.06	0.37609	10.2575	0.596558
3/30/2018 4:45:00 PM.000	539	0.16	2.15	1.02	0.26182	10.265	0.415241
3/30/2018 4:50:00 PM.000	521.9	0.58	2.62	0.81	0.21642	10.265	1.27867
3/30/2018 4:55:00 PM.000	526.7	0.7	2.9	0.54	0.16758	10.2675	1.4403
3/30/2018 5:00:00 PM.000	645.7	0.72	2.8	0.47	0.10128	10.2725	0.851819
3/30/2018 5:05:00 PM.000	1009.4	0.88	2.85	0.52	0.19039	10.275	1.96967
3/30/2018 5:10:00 PM.000	1108.5	1.24	2.87	0.83	0.1754	10.2775	1.8992
3/30/2018 5:15:00 PM.000	1136.5	1.62	2.7	0.98	0.13537	10.2775	1.55137
3/30/2018 5:20:00 PM.000	1137.1	1.77	2.64	1.02	0.17108	10.285	1.57153
3/30/2018 5:25:00 PM.000	1119.8	0.67	2.67	1.48	0.19862	10.2875	1.07454
3/30/2018 5:30:00 PM.000	1097.7	0.46	1.95	1.77	0.19879	10.29	0.932488
3/30/2018 5:35:00 PM.000	1113.7	0.62	1.45	2.14	0.21733	10.2925	1.20407
3/30/2018 5:40:00 PM.000	1099.6	1.11	1.65	1.99	0.26476	10.2925	2.55675
3/30/2018 5:45:00 PM.000	921.7	0.29	1.51	1.97	0.31339	10.2975	1.94492
3/30/2018 5:50:00 PM.000	592.8	0.06	0.89	2.07	0.33532	10.2975	0.532346
3/30/2018 5:55:00 PM.000	513.2	0.06	0.91	2	0.39274	10.3	0.623617
3/30/2018 6:00:00 PM.000	506.8	0.05	1.13	2.11	0.43195	10.3025	0.685962
3/30/2018 6:05:00 PM.000	499.5	0.05	0.95	1.76	0.43886	10.3025	0.696942
3/30/2018 6:10:00 PM.000	514.8	0.05	0.99	1.67	0.47285	10.3025	0.750955
3/30/2018 6:15:00 PM.000	633.6	0.05	1.34	1.36	0.49957	10.3025	0.793416
3/30/2018 6:20:00 PM.000	1043	0.05	1.57	1.52	0.48987	10.3025	0.778001
3/30/2018 6:25:00 PM.000	1127.7	0.05	1.64	1.49	0.47758	10.3025	0.758472
3/30/2018 6:30:00 PM.000	1226.6	0.05	1.97	1.38	0.46006	10.3025	0.730631
3/30/2018 6:35:00 PM.000	1165.1	0.05	2.37	0.88	0.3806	10.305	0.604398
3/30/2018 6:40:00 PM.000	1143.2	0.36	2.66	0.68	0.28378	10.3025	0.291157
3/30/2018 6:45:00 PM.000	1131.8	1.29	3.01	0.55	0.21962	10.305	1.96058
3/30/2018 6:50:00 PM.000	1116.9	1.39	3.47	0.82	0.2025	10.31	1.93225
3/30/2018 6:55:00 PM.000	1084	0.89	3.44	0.89	0.13043	10.31	0.946527
3/30/2018 7:00:00 PM.000	680.2	0.76	3.4	1.21	0.21372	10.31	1.41979
3/30/2018 7:05:00 PM.000	590.7	0.95	3.57	1.33	0.22719	10.31	1.85295
3/30/2018 7:10:00 PM.000	606.7	0.95	3.31	1.6	0.17798	10.3125	1.49256
3/30/2018 7:15:00 PM.000	606.7	0.8	2.59	1.67	0.23627	10.31	1.72892
3/30/2018 7:20:00 PM.000	608.5	1.06	2.54	1.75	0.26279	10.3075	1.97965
3/30/2018 7:25:00 PM.000	605.4	1.26	2.51	1.94	0.24023	10.3075	2.28715
3/30/2018 7:30:00 PM.000	902.3	1.75	1.81	1.91	0.25395	10.31	3.17907
3/30/2018 7:35:00 PM.000	1136.9	1.63	1.49	2.11	0.27563	10.3075	2.64895
3/30/2018 7:40:00 PM.000	1226.7	0.32	1.38	2.43	0.30219	10.3075	1.08396
3/30/2018 7:45:00 PM.000	1192.3	0.07	0.83	2.72	0.34443	10.3075	0.54695
3/30/2018 7:50:00 PM.000	1139.6	0.06	0.62	2.8	0.38825	10.3075	0.616592
3/30/2018 7:55:00 PM.000	765.6	0.06	0.85	2.49	0.41827	10.3125	0.664381
3/30/2018 8:00:00 PM.000	610.4	0.05	1.08	2.37	0.44985	10.31	0.714534
3/30/2018 8:05:00 PM.000	567.3	0.05	1.72	2.1	0.48513	10.3075	0.770561
3/30/2018 8:10:00 PM.000	560	0.05	2.07	1.96	0.49962	10.3125	0.793683
3/30/2018 8:15:00 PM.000	584.9	0.05	2.08	1.65	0.51292	10.31	0.814775
3/30/2018 8:20:00 PM.000	572.3	0.05	2.46	1.43	0.50845	10.31	0.80767
3/30/2018 8:25:00 PM.000	561.3	0.08	2.77	1.22	0.46966	10.3075	0.745975
3/30/2018 8:30:00 PM.000	630.8	0.77	2.82	1.02	0.44353	10.31	1.58204
3/30/2018 8:35:00 PM.000	1048.9	1.52	3.09	0.84	0.42797	10.31	4.1142
3/30/2018 8:40:00 PM.000	1188.3	1.29	3.28	0.92	0.39231	10.31	3.80709
3/30/2018 8:45:00 PM.000	1193.3	0.89	3.04	0.99	0.39501	10.31	3.0788
3/30/2018 8:50:00 PM.000	1166.6	0.78	2.89	1.33	0.41639	10.3075	2.28389
3/30/2018 8:55:00 PM.000	1170.6	1.15	2.89	1.56	0.41294	10.31	3.01832
3/30/2018 9:00:00 PM.000	1174.5	0.99	2.89	1.65	0.41321	10.3075	3.09956
3/30/2018 9:05:00 PM.000	1088.8	0.98	2.89	1.84	0.42817	10.31	2.96366
3/30/2018 9:10:00 PM.000	757.7	1.15	2.89	1.86	0.43679	10.31	3.31809
3/30/2018 9:15:00 PM.000	591	1.3	2.89	2.41	0.43264	10.31	3.77717
3/30/2018 9:20:00 PM.000	563.2	1.25	1.98	2.73	0.42978	10.31	3.25173
3/30/2018 9:25:00 PM.000	571.3	1.11	0.69	2.97	0.43033	10.31	2.63012
3/30/2018 9:30:00 PM.000	578.5	0.32	0.53	3.01	0.46675	10.3125	1.77098
3/30/2018 9:35:00 PM.000	583.7	0.07	0.26	2.98	0.50134	10.3125	0.796417
3/30/2018 9:40:00 PM.000	661.7	0.06	0.2	2.93	0.53074	10.31	0.843097
3/30/2018 9:45:00 PM.000	1047.1	0.06	0.32	2.68	0.57508	10.31	0.91357
3/30/2018 9:50:00 PM.000	1163.2	0.05	0.52	2.4	0.59481	10.31	0.944928
3/30/2018 9:55:00 PM.000	1178.6	0.05	0.66	2.19	0.59864	10.31	0.951015
3/30/2018 10:00:00 PM.000	1176.7	0.05	0.93	2.19	0.61862	10.31	0.982771
3/30/2018 10:05:00 PM.000	1112.9	0.05	1.26	2.06	0.61007	10.3125	0.969239
3/30/2018 10:10:00 PM.000	841.8	0.05	1.51	1.75	0.55139	10.315	0.876022
3/30/2018 10:15:00 PM.000	607.1	0.05	1.82	1.45	0.52504	10.315	0.834137
3/30/2018 10:20:00 PM.000	558.7	0.05	2.21	1.24	0.50811	10.315	0.807226
3/30/2018 10:25:00 PM.000	560.6	0.1	2.47	1.18	0.44981	10.315	0.714555
3/30/2018 10:30:00 PM.000	562.1	0.42	2.55	0.98	0.41939	10.31	2.04059
3/30/2018 10:35:00 PM.000	568	0.49	2.8	0.94	0.44056	10.3075	3.02482
3/30/2018 10:40:00 PM.000	576.7	0.52	2.88	1.05	0.41683	10.305	2.83809
3/30/2018 10:45:00 PM.000	936.3	0.56	2.56	1.28	0.41597	10.305	3.55081
3/30/2018 10:50:00 PM.000	1150.8	1.26	2.32	1.15	0.43228	10.305	4.85329
3/30/2018 10:55:00 PM.000	1149.3	1.87	2.33	1.1	0.41944	10.305	5.05427
3/30/2018 11:00:00 PM.000	1163.7	1.47	2.06	1.15	0.40765	10.3	3.74474
3/30/2018 11:05:00 PM.000	1190.1	0.8	1.58	1.68	0.41669	10.3	2.39754
3/30/2018 11:10:00 PM.000	1131.8	0.53	1.34	1.89	0.44308	10.3	2.17484
3/30/2018 11:15:00 PM.000	843.1	0.1	1.24	2.01	0.48601	10.305	1.05802
3/30/2018 11:20:00 PM.000	594.5	0.06	0.97	1.9	0.52608	10.305	0.835592
3/30/2018 11:25:00 PM.000	547.4	0.06	0.97	2.01	0.5613	10.3025	0.89151
3/30/2018 11:30:00 PM.000	545.3	0.05	1.2	2.02	0.58871	10.3	0.935011
3/30/2018 11:35:00 PM.000	549.5	0.05	1.53	1.7	0.61081	10.2975	0.97007
3/30/2018 11:40:00 PM.000	542.9	0.05	1.55	1.31	0.62646	10.2975	0.994936
3/30/2018 11:45:00 PM.000	534.9	0.05	1.71	0.82	0.62353	10.3	0.990339
3/30/2018 11:50:00 PM.000	642.4	0.21	1.97	0.74	0.59001	10.2975	0.580419
3/30/2018 11:55:00 PM.000	1051.9	0.43	2.02	0.71	0.55778	10.2975	3.86629
3/31/2018 12:00:00 AM.000	1169.3	0.47	2.15	0.74	0.55919	10.2975	5.06071
3/31/2018 12:05:00 AM.000	1184.2	1	2.26	0.73	0.54826	10.2975	5.28994
3/31/2018 12:10:00 AM.000	1146.7	0.95	2.25	0.8	0.54229	10.2975	4.95182
3/31/2018 12:15:00 AM.000	913.7	1.06	1.83	1.01	0.53914	10.2975	6.00707
3/31/2018 12:20:00 AM.000	620.8	1.67	1.57	1.39	0.52897	10.295	6.67772
3/31/2018 12:25:00 AM.000	551.4	1.58	1.5	1.24	0.52061	10.295	6.36815
3/31/2018 12:30:00 AM.000	542.3	0.23	1.16	1.41	0.56007	10.2975	2.23535
3/31/2018 12:35:00 AM.000	550.3	0.06	0.75	1.55	0.59819	10.2975	0.950018
3/31/2018 12:40:00 AM.000	563.4	0.06	0.76	1.88	0.62832	10.2975	0.997891
3/31/2018 12:45:00 AM.000	551.5	0.06	0.97	1.75	0.66319	10.2975	1.0533
3/31/2018 12:50:00 AM.000	546.1	0.05	1.18	1.6	0.68576	10.2975	1.08916
3/31/2018 12:55:00 AM.000	555.8	0.05	1.22	1.44	0.69604	10.2975	1.10549
3/31/2018 1:00:00 AM.000	771.8	0.05	1.42	1.19	0.69437	10.2975	1.10284
3/31/2018 1:05:00 AM.000	1086.2	0.05	1.61	0.85	0.62706	10.2975	0.995889
3/31/2018 1:10:00 AM.000	1136.6	0.47	1.69	0.73	0.52726	10.2975	0.413545
3/31/2018 1:15:00 AM.000	1114.8	1.13	1.87	0.65	0.48	10.295	4.11198
3/31/2018 1:20:00 AM.000	1088.7	1.42	2.15	0.73	0.47932	10.2925	4.91763
3/31/2018 1:25:00 AM.000	1123.1	1.14	2.16	0.88	0.37493	10.295	3.56931
3/31/2018 1:30:00 AM.000	1123.6	1.26	1.7	1.09	0.4489	10.2925	3.71727
3/31/2018 1:35:00 AM.000	818.8	1.28	1.31	1.21	0.46306	10.2975	4.77506
3/31/2018 1:40:00 AM.000	566.3	0.93	1.31	1.43	0.39838	10.295	3.83467
3/31/2018 1:45:00 AM.000	571.1	0.27	1.06	1.52	0.47879	10.295	3.12759
3/31/2018 1:50:00 AM.000	573.9	0.06	0.65	1.67	0.53944	10.295	0.85662
3/31/2018 1:55:00 AM.000	579	0.06	0.66	1.55	0.53171	10.295	0.844338
3/31/2018 2:00:00 AM.000	574	0.06	0.78	1.5	0.57215	10.2925	0.908535
3/31/2018 2:05:00 AM.000	558.3	0.05	0.7	1.22	0.61252	10.2925	0.972671
3/31/2018 2:10:00 AM.000	554.4	0.05	1.04	0.91	0.59683	10.2925	0.947745
3/31/2018 2:15:00 AM.000	568.2	0.05	1.29	0.95	0.58212	10.29	0.92432
3/31/2018 2:20:00 AM.000	576.5	0.3	1.23	0.82	0.57296	10.29	0.492498
3/31/2018 2:25:00 AM.000	577.2	0.67	1.46	0.75	0.53567	10.2925	4.18553
3/31/2018 2:30:00 AM.000	580.6	0.74	1.71	0.6	0.49103	10.29	4.43693
3/31/2018 2:35:00 AM.000	587.3	0.99	1.56	0.8	0.45167	10.29	4.50092
3/31/2018 2:40:00 AM.000	592.9	1.2	1.51	0.87	0.50407	10.2875	4.68907
3/31/2018 2:45:00 AM.000	570.3	1.18	1.53	1.07	0.48491	10.2875	4.33401
3/31/2018 2:50:00 AM.000	570.2	1.41	1.15	1.21	0.44122	10.29	3.76823
3/31/2018 2:55:00 AM.000	566.5	0.84	0.75	1.35	0.47472	10.2875	3.08259
3/31/2018 3:00:00 AM.000	564.7	0.2	0.67	1.42	0.51747	10.2875	1.51431
3/31/2018 3:05:00 AM.000	553.1	0.06	0.54	1.46	0.54595	10.285	0.866757
3/31/2018 3:10:00 AM.000	562.6	0.06	0.3	1.67	0.58857	10.285	0.934456
3/31/2018 3:15:00 AM.000	571.3	0.06	0.39	1.53	0.62138	10.2825	0.986513
3/31/2018 3:20:00 AM.000	567	0.05	0.49	1.43	0.63344	10.2825	1.00567
3/31/2018 3:25:00 AM.000	579.1	0.05	0.38	1.25	0.64566	10.28	1.02502
3/31/2018 3:30:00 AM.000	942.3	0.05	0.41	1.01	0.64898	10.28	1.03029
3/31/2018 3:35:00 AM.000	1147.9	0.05	0.51	0.84	0.60354	10.2775	0.958064
3/31/2018 3:40:00 AM.000	1164.3	0.05	0.47	0.64	0.52407	10.2775	0.831854
3/31/2018 3:45:00 AM.000	1122.8	0.05	0.74	0.66	0.36837	10.2775	0.584581
3/31/2018 3:50:00 AM.000	1070.8	0.05	1.16	0.54	0.05104	10.2775	0.0806167
3/31/2018 3:55:00 AM.000	639.9	0.13	1.25	0.55	0.00124	10.2725	0.00152711
3/31/2018 4:00:00 AM.000	575.6	0.55	1.54	0.59	2e-05	10.2725	0.000113437
3/31/2018 4:05:00 AM.000	571	0.84	1.96	0.72	0	10.2725	0
3/31/2018 4:10:00 AM.000	580.4	0.78	2	0.75	0.00094	10.275	0.00819704
3/31/2018 4:15:00 AM.000	589.3	0.8	1.88	0.69	0.01057	10.275	0.104532
3/31/2018 4:20:00 AM.000	583.1	1.03	1.97	0.79	0.02775	10.2725	0.307107
3/31/2018 4:25:00 AM.000	576.7	1.11	1.99	0.95	0.03964	10.275	0.404609
3/31/2018 4:30:00 AM.000	574.9	1.41	1.6	1.32	0.05209	10.275	0.696237
3/31/2018 4:35:00 AM.000	564.4	1.79	1.25	1.41	0.06408	10.27	0.872849
3/31/2018 4:40:00 AM.000	578.8	1.07	1.17	1.62	0.07393	10.27	0.652067
3/31/2018 4:45:00 AM.000	566.5	0.11	0.83	1.62	0.1356	10.27	0.142515
3/31/2018 4:50:00 AM.000	559.1	0.06	0.46	1.75	0.18815	10.27	0.298313
3/31/2018 4:55:00 AM.000	572.3	0.06	0.53	1.68	0.2191	10.27	0.347458
3/31/2018 5:00:00 AM.000	579.6	0.06	0.61	1.45	0.25518	10.27	0.404747
3/31/2018 5:05:00 AM.000	574.3	0.05	0.54	1.19	0.27934	10.27	0.44311
3/31/2018 5:10:00 AM.000	568.8	0.05	0.74	0.95	0.29349	10.27	0.465578
3/31/2018 5:15:00 AM.000	570.3	0.05	1.06	1	0.29602	10.2675	0.469568
3/31/2018 5:20:00 AM.000	570.3	0.05	1.06	0.91	0.25948	10.2675	0.411551
3/31/2018 5:25:00 AM.000	569.3	0.38	1.19	0.72	0.24112	10.265	0.267465
3/31/2018 5:30:00 AM.000	569.2	0.81	1.49	0.43	0.16743	10.265	1.33892
3/31/2018 5:35:00 AM.000	574.1	1.01	1.52	0.38	0.14307	10.265	1.45008
3/31/2018 5:40:00 AM.000	576.6	0.94	1.36	0.51	0.14635	10.26	1.4953
3/31/2018 5:45:00 AM.000	558.9	1.09	1.15	0.77	0.19794	10.26	2.44864
3/31/2018 5:50:00 AM.000	552.3	1.3	0.92	0.84	0.18126	10.26	2.00869
3/31/2018 5:55:00 AM.000	557.3	0.75	0.71	0.93	0.16778	10.26	1.41134
3/31/2018 6:00:00 AM.000	556	0.08	0.51	1.13	0.25205	10.26	0.217777
3/31/2018 6:05:00 AM.000	562.3	0.06	0.31	1.22	0.27235	10.26	0.431908
3/31/2018 6:10:00 AM.000	560.6	0.06	0.32	1.53	0.26979	10.26	0.427844
3/31/2018 6:15:00 AM.000	573.2	0.05	0.48	1.48	0.32071	10.26	0.508679
3/31/2018 6:20:00 AM.000	575.3	0.05	0.74	1.31	0.30412	10.26	0.482343
3/31/2018 6:25:00 AM.000	577.2	0.05	0.82	1.02	0.20917	10.2575	0.331592
3/31/2018 6:30:00 AM.000	583.1	0.12	0.94	0.67	0.06075	10.2525	0.0959803
3/31/2018 6:35:00 AM.000	578.2	0.43	1.22	0.8	0.01447	10.2525	0.0506873
3/31/2018 6:40:00 AM.000	567.9	0.29	1.35	0.6	0.00406	10.2525	0.0209207
3/31/2018 6:45:00 AM.000	562.1	0.35	1.39	0.73	0.00397	10.2525	0.0208999
3/31/2018 6:50:00 AM.000	549.2	0.75	1.4	0.72	0.02375	10.25	0.21304
3/31/2018 6:55:00 AM.000	557.4	1	1.1	0.89	0.02581	10.25	0.274716
3/31/2018 7:00:00 AM.000	552	1.46	0.99	0.96	0.03289	10.245	0.373892
3/31/2018 7:05:00 AM.000	543.5	0.72	0.89	1.14	0.03869	10.245	0.338171
3/31/2018 7:10:00 AM.000	556.1	0.09	0.54	1.22	0.0858	10.245	0.117302
3/31/2018 7:15:00 AM.000	567.5	0.06	0.34	1.29	0.11693	10.245	0.185116
3/31/2018 7:20:00 AM.000	574.6	0.06	0.49	1.19	0.13872	10.245	0.219695
3/31/2018 7:25:00 AM.000	581.5	0.05	0.77	1.06	0.12523	10.245	0.198287
3/31/2018 7:30:00 AM.000	581.2	0.05	0.84	0.94	0.0099	10.2425	0.0152675
3/31/2018 7:35:00 AM.000	571.7	0.14	0.98	0.83	0	10.2375	-0.000442044
3/31/2018 7:40:00 AM.000	557	0.42	1.26	0.68	0	10.2375	0
3/31/2018 7:45:00 AM.000	548.1	0.29	1.38	0.64	0	10.2375	0
3/31/2018 7:50:00 AM.000	533.7	0.46	1.39	0.53	0	10.24	0
3/31/2018 7:55:00 AM.000	567.1	0.68	1.31	0.59	0.00609	10.2375	0.0557025
3/31/2018 8:00:00 AM.000	612.3	1.12	1.1	0.75	0.01986	10.24	0.182613
3/31/2018 8:05:00 AM.000	620.9	1.28	0.97	0.78	0.02427	10.2375	0.227627
3/31/2018 8:10:00 AM.000	621.1	0.31	0.79	1.02	0.04307	10.2375	0.226667
3/31/2018 8:15:00 AM.000	620.4	0.06	0.48	0.98	0.09037	10.235	0.142934
3/31/2018 8:20:00 AM.000	616.1	0.06	0.38	1.01	0.11753	10.2375	0.186035
3/31/2018 8:25:00 AM.000	617.7	0.05	0.59	0.87	0.12374	10.2375	0.195888
3/31/2018 8:30:00 AM.000	613.9	0.05	0.88	0.86	0.02186	10.24	0.0342438
3/31/2018 8:35:00 AM.000	616.5	0.05	0.92	0.82	0	10.2375	-0.000442044
3/31/2018 8:40:00 AM.000	616.5	0.35	1.1	0.73	0	10.2375	0
3/31/2018 8:45:00 AM.000	612	1.05	1.39	0.74	0	10.2375	0
3/31/2018 8:50:00 AM.000	615.4	0.94	1.47	0.86	0	10.2375	0
3/31/2018 8:55:00 AM.000	621.2	0.89	1.47	1.13	0.00433	10.2375	0.0291101
3/31/2018 9:00:00 AM.000	615.1	0.82	1.47	0.98	0.02057	10.24	0.137594
3/31/2018 9:05:00 AM.000	607.3	1	1.47	1.13	0.03035	10.24	0.283201
3/31/2018 9:10:00 AM.000	615.9	1.6	1.47	1.25	0.03681	10.24	0.420629
3/31/2018 9:15:00 AM.000	619	1.32	1.47	1.69	0.04155	10.2425	0.268745
3/31/2018 9:20:00 AM.000	613.9	0.76	1	1.9	0.04166	10.2425	0.164263
3/31/2018 9:25:00 AM.000	608.4	0.56	0.17	2.05	0.03658	10.2425	0.101208
3/31/2018 9:30:00 AM.000	601	0.1	0.11	2.14	0.05883	10.2425	0.0632559
3/31/2018 9:35:00 AM.000	603	0.06	0.09	2.1	0.08684	10.2425	0.137358
3/31/2018 9:40:00 AM.000	609.4	0.06	0.08	1.87	0.06359	10.2425	0.100464
3/31/2018 9:45:00 AM.000	604.8	0.05	0.18	1.67	0.0584	10.245	0.0922339
3/31/2018 9:50:00 AM.000	600.4	0.05	0.43	1.43	0.05712	10.2475	0.090208
3/31/2018 9:55:00 AM.000	621.7	0.05	0.51	1.51	0.02272	10.25	0.035617
3/31/2018 10:00:00 AM.000	615.9	0.05	0.69	1.25	0.00107	10.25	0.00125619
3/31/2018 10:05:00 AM.000	597.7	0.05	0.95	0.96	0	10.25	-0.00044201
3/31/2018 10:10:00 AM.000	602.4	0.07	1.06	0.73	0	10.2475	-0.000442017
3/31/2018 10:15:00 AM.000	615.1	0.46	1.26	0.6	0	10.2475	0
3/31/2018 10:20:00 AM.000	609.2	0.85	1.51	0.71	0	10.2475	0
3/31/2018 10:25:00 AM.000	616	1.46	1.59	0.55	0.00139	10.2525	0.0146301
3/31/2018 10:30:00 AM.000	621.1	1.09	1.45	0.84	0.00528	10.2525	0.0397697
3/31/2018 10:35:00 AM.000	627.5	0.66	1.02	1.01	0.01646	10.2525	0.0898576
3/31/2018 10:40:00 AM.000	627.7	0.43	0.86	1.18	0.03407	10.2525	0.184165
3/31/2018 10:45:00 AM.000	616.7	0.08	0.72	1.21	0.08145	10.2525	0.0827148
3/31/2018 10:50:00 AM.000	610.6	0.06	0.49	1.13	0.1196	10.2525	0.189387
3/31/2018 10:55:00 AM.000	619.1	0.05	0.49	0.93	0.13919	10.255	0.220493
3/31/2018 11:00:00 AM.000	629.4	0.05	0.64	0.71	0.13903	10.255	0.220239
3/31/2018 11:05:00 AM.000	623	0.05	0.94	0.71	0.02156	10.255	0.03378
3/31/2018 11:10:00 AM.000	635.2	0.05	1.07	0.71	0	10.2575	-0.00044199
3/31/2018 11:15:00 AM.000	911.8	0.08	1.21	0.69	0	10.2575	-0.00044199
3/31/2018 11:20:00 AM.000	1197.9	0.12	1.48	0.63	0	10.26	0
3/31/2018 11:25:00 AM.000	1244.5	0.51	1.65	0.73	0	10.2575	0
3/31/2018 11:30:00 AM.000	1230.3	1.02	1.78	0.78	0	10.26	0
3/31/2018 11:35:00 AM.000	1226.2	1.37	1.77	0.71	0.0055	10.2625	0.0597613
3/31/2018 11:40:00 AM.000	1167.3	1.27	1.33	0.91	0.00566	10.2625	0.0449072
3/31/2018 11:45:00 AM.000	766	0.97	1.14	1.01	0.01358	10.265	0.0960894
3/31/2018 11:50:00 AM.000	625.4	0.26	0.96	1.37	0.04766	10.265	0.215075
3/31/2018 11:55:00 AM.000	594.8	0.06	0.66	1.43	0.09956	10.2675	0.157636
3/31/2018 12:00:00 PM.000	595	0.06	0.52	1.41	0.13491	10.27	0.213776
3/31/2018 12:05:00 PM.000	598.6	0.05	0.67	1.22	0.15927	10.27	0.252456
3/31/2018 12:10:00 PM.000	613.3	0.05	0.99	1.13	0.12577	10.27	0.199263
3/31/2018 12:15:00 PM.000	616	0.05	1.11	0.96	0.00193	10.2725	0.0026228
3/31/2018 12:20:00 PM.000	617.6	0.22	1.22	0.98	0	10.2675	0
3/31/2018 12:25:00 PM.000	621.1	0.53	1.49	0.94	0	10.27	0
3/31/2018 12:30:00 PM.000	626.1	0.6	1.68	1.15	0	10.2725	0
3/31/2018 12:35:00 PM.000	626.6	0.73	1.67	1.05	0.00534	10.27	0.0458976
3/31/2018 12:40:00 PM.000	619.1	0.74	1.72	1.03	0.02045	10.27	0.165277
3/31/2018 12:45:00 PM.000	765.5	1.24	1.48	1.04	0.03908	10.27	0.426007
3/31/2018 12:50:00 PM.000	1153.5	1.9	1.09	1	0.04545	10.27	0.493434
3/31/2018 12:55:00 PM.000	1270.7	0.92	0.95	1.16	0.04935	10.2725	0.332791
3/31/2018 1:00:00 PM.000	1283.5	0.1	0.71	1.37	0.0939	10.2725	0.156623
3/31/2018 1:05:00 PM.000	1234.8	0.06	0.37	1.73	0.13635	10.275	0.216088
3/31/2018 1:10:00 PM.000	1203.7	0.06	0.33	1.81	0.16328	10.275	0.258854
3/31/2018 1:15:00 PM.000	1143.5	0.05	0.49	1.43	0.19076	10.28	0.30253
3/31/2018 1:20:00 PM.000	758.1	0.05	0.83	1.07	0.19824	10.2775	0.314391
3/31/2018 1:25:00 PM.000	622.2	0.05	1.29	0.68	0.10991	10.275	0.1741
3/31/2018 1:30:00 PM.000	603.5	0.09	1.47	0.56	0.00075	10.28	0.000749245
3/31/2018 1:35:00 PM.000	588.4	0.4	1.62	0.62	0	10.28	0
3/31/2018 1:40:00 PM.000	606.3	0.72	1.87	0.7	0	10.2775	0
3/31/2018 1:45:00 PM.000	694.4	1.08	1.99	0.69	0.00043	10.2775	0.00386677
3/31/2018 1:50:00 PM.000	1053.4	1.43	1.96	0.56	0.00776	10.2775	0.0904558
3/31/2018 1:55:00 PM.000	1176.1	1.14	1.84	0.65	0.01621	10.28	0.152983
3/31/2018 2:00:00 PM.000	1208.7	1.07	1.7	1.03	0.03263	10.2825	0.308328
3/31/2018 2:05:00 PM.000	1186.2	1.19	1.24	1.41	0.04928	10.2825	0.624656
3/31/2018 2:10:00 PM.000	1169	1.59	0.92	1.64	0.05821	10.2825	0.780054
3/31/2018 2:15:00 PM.000	1183.8	0.83	0.85	1.82	0.08019	10.285	0.66007
3/31/2018 2:20:00 PM.000	1172.3	0.09	0.55	1.98	0.12984	10.285	0.0998874
3/31/2018 2:25:00 PM.000	845.4	0.06	0.27	2.08	0.16993	10.285	0.269479
3/31/2018 2:30:00 PM.000	640.8	0.06	0.39	2.03	0.20158	10.2825	0.319733
3/31/2018 2:35:00 PM.000	603.3	0.06	0.88	1.93	0.24717	10.285	0.392168
3/31/2018 2:40:00 PM.000	608.4	0.05	1.15	1.67	0.25573	10.285	0.405765
3/31/2018 2:45:00 PM.000	604	0.05	1.06	1.23	0.24916	10.2825	0.395306
3/31/2018 2:50:00 PM.000	650.5	0.05	1.37	0.9	0.24992	10.2825	0.396513
3/31/2018 2:55:00 PM.000	1053.8	0.24	1.64	0.83	0.20715	10.2825	0.32858
3/31/2018 3:00:00 PM.000	1181	1.12	1.65	0.77	0.16971	10.2825	1.32522
3/31/2018 3:05:00 PM.000	1215.4	1.84	1.86	0.84	0.18725	10.2825	1.95331
3/31/2018 3:10:00 PM.000	1202	0.96	2	1.01	0.16442	10.2825	0.960215
3/31/2018 3:15:00 PM.000	1190.9	0.48	1.62	1.42	0.18165	10.2825	0.61881
3/31/2018 3:20:00 PM.000	1211.1	0.59	0.99	1.52	0.20911	10.2825	0.931811
3/31/2018 3:25:00 PM.000	1165.8	0.49	1.08	1.49	0.21916	10.2825	1.59819
3/31/2018 3:30:00 PM.000	936.7	0.09	1.06	1.41	0.27142	10.2825	0.55032
3/31/2018 3:35:00 PM.000	647.7	0.06	0.68	1.59	0.30393	10.2825	0.482299
3/31/2018 3:40:00 PM.000	601.7	0.05	0.72	1.55	0.32665	10.2825	0.518385
3/31/2018 3:45:00 PM.000	583.8	0.05	1.15	1.56	0.34782	10.2825	0.55201
3/31/2018 3:50:00 PM.000	590	0.05	1.37	1.29	0.34003	10.2825	0.539637
3/31/2018 3:55:00 PM.000	616.6	0.05	1.3	1.04	0.30525	10.28	0.484366
3/31/2018 4:00:00 PM.000	668	0.09	1.66	0.75	0.11946	10.28	0.189288
3/31/2018 4:05:00 PM.000	1046.4	0.3	1.88	0.61	0.02742	10.28	0.118836
3/31/2018 4:10:00 PM.000	1162.5	0.86	1.86	0.59	0.02991	10.28	0.292096
3/31/2018 4:15:00 PM.000	1199.1	1.78	2.03	0.65	0.01881	10.28	0.188019
3/31/2018 4:20:00 PM.000	1189.9	1.3	2.24	0.78	0.0129	10.28	0.090971
3/31/2018 4:25:00 PM.000	1188	0.61	1.8	0.91	0.03406	10.28	0.135763
3/31/2018 4:30:00 PM.000	1076.6	0.27	1.21	1.16	0.07618	10.28	0.227483
3/31/2018 4:35:00 PM.000	698.1	0.27	1.22	1.2	0.08391	10.28	0.416443
3/31/2018 4:40:00 PM.000	595.7	0.19	1.26	1.34	0.12808	10.28	0.786748
3/31/2018 4:45:00 PM.000	573.3	0.06	0.96	1.27	0.1794	10.28	0.284487
3/31/2018 4:50:00 PM.000	621.3	0.05	0.88	1.34	0.19415	10.28	0.307914
3/31/2018 4:55:00 PM.000	1009.8	0.05	1.12	1.12	0.21922	10.28	0.347731
3/31/2018 5:00:00 PM.000	1163.6	0.05	1.34	1.06	0.23542	10.28	0.37346
3/31/2018 5:05:00 PM.000	1151.1	0.05	1.47	0.85	0.16639	10.28	0.263824
3/31/2018 5:10:00 PM.000	1169.7	0.2	1.74	0.92	0.10459	10.28	0.0947608
3/31/2018 5:15:00 PM.000	958.9	0.4	2.11	0.68	0.00831	10.28	0.0520513
3/31/2018 5:20:00 PM.000	663.2	0.67	2.32	0.71	0.0027	10.28	0.0261213
3/31/2018 5:25:00 PM.000	591.1	1.18	2.46	0.5	0.01417	10.28	0.136713
3/31/2018 5:30:00 PM.000	583.2	1.73	2.73	0.71	0.03209	10.28	0.289143
3/31/2018 5:35:00 PM.000	581	1.18	2.48	1.02	0.02866	10.28	0.182715
3/31/2018 5:40:00 PM.000	583.6	0.46	1.88	1.43	0.0423	10.28	0.194453
3/31/2018 5:45:00 PM.000	576.9	0.56	1.66	1.56	0.07976	10.28	0.341173
3/31/2018 5:50:00 PM.000	579.6	0.33	1.67	1.59	0.10554	10.28	0.641797
3/31/2018 5:55:00 PM.000	812.8	0.07	1.32	1.45	0.15886	10.275	0.0446167
3/31/2018 6:00:00 PM.000	1275.8	0.06	1.14	1.64	0.21402	10.2725	0.339411
3/31/2018 6:05:00 PM.000	1213	0.06	1.35	1.39	0.2467	10.2725	0.391306
3/31/2018 6:10:00 PM.000	1168.3	0.05	1.27	1.32	0.25662	10.275	0.407082
3/31/2018 6:15:00 PM.000	1167.9	0.05	1.19	0.98	0.27908	10.275	0.44275
3/31/2018 6:20:00 PM.000	1136.4	0.05	1.74	0.77	0.28661	10.275	0.454708
3/31/2018 6:25:00 PM.000	860.3	0.05	2.31	0.57	0.11197	10.275	0.177372
3/31/2018 6:30:00 PM.000	615.5	0.13	2.2	0.34	0.00247	10.2725	0.00348029
3/31/2018 6:35:00 PM.000	566.8	0.81	2.58	0.47	0.02153	10.2725	0.11528
3/31/2018 6:40:00 PM.000	572.8	1.25	3.15	0.68	0	10.2725	0
3/31/2018 6:45:00 PM.000	552.1	1.49	2.88	0.81	0.00032	10.2725	0.00278801
3/31/2018 6:50:00 PM.000	551	1.27	2.53	0.86	0.02078	10.27	0.159145
3/31/2018 6:55:00 PM.000	558.7	1.16	2.68	0.86	0.02054	10.27	0.132997
3/31/2018 7:00:00 PM.000	564.7	0.71	2.68	1.11	0.03682	10.27	0.180736
3/31/2018 7:05:00 PM.000	798.5	0.28	1.89	1.34	0.0704	10.2675	0.207852
3/31/2018 7:10:00 PM.000	1159.6	0.55	1.71	1.6	0.09613	10.2675	0.511511
3/31/2018 7:15:00 PM.000	1237.5	0.86	2.01	1.69	0.11735	10.2675	1.15821
3/31/2018 7:20:00 PM.000	1234.6	0.17	1.6	1.77	0.17776	10.2675	0.856971
3/31/2018 7:25:00 PM.000	1223.6	0.06	1.23	1.76	0.22957	10.265	0.364039
3/31/2018 7:30:00 PM.000	1222.1	0.06	1.45	1.69	0.24621	10.2675	0.390481
3/31/2018 7:35:00 PM.000	994	0.06	1.44	1.52	0.27452	10.2625	0.435379
3/31/2018 7:40:00 PM.000	659.2	0.05	1.44	1.38	0.30015	10.2625	0.476069
3/31/2018 7:45:00 PM.000	568.9	0.05	2.24	1.25	0.31541	10.2625	0.500295
3/31/2018 7:50:00 PM.000	557.5	0.06	2.5	1.04	0.30923	10.2625	0.490484
3/31/2018 7:55:00 PM.000	563.7	0.53	2.4	0.77	0.29633	10.26	0.512495
3/31/2018 8:00:00 PM.000	576.1	1.33	2.74	0.54	0.28508	10.2625	2.87282
3/31/2018 8:05:00 PM.000	567.7	1.66	2.88	0.68	0.25954	10.265	2.4334
3/31/2018 8:10:00 PM.000	610.7	0.89	2.53	0.94	0.25653	10.265	1.33496
3/31/2018 8:15:00 PM.000	1017.7	0.56	2.38	1.17	0.27588	10.2625	1.03553
3/31/2018 8:20:00 PM.000	1180.1	0.32	2.6	1.26	0.29916	10.2625	0.945017
3/31/2018 8:25:00 PM.000	1230.5	0.4	2.22	1.26	0.3064	10.2625	1.64049
3/31/2018 8:30:00 PM.000	1204.1	0.72	1.78	1.38	0.33474	10.2625	2.44304
3/31/2018 8:35:00 PM.000	1179.2	1.07	2	1.47	0.34485	10.2575	3.46725
3/31/2018 8:40:00 PM.000	1085.5	1.7	1.86	1.66	0.33936	10.2575	4.03547
3/31/2018 8:45:00 PM.000	593.2	1.77	1.35	1.84	0.33587	10.26	3.67973
3/31/2018 8:50:00 PM.000	593.3	1.15	1.18	2.1	0.33695	10.2575	2.20089
3/31/2018 8:55:00 PM.000	632.8	0.2	1.18	2.43	0.37422	10.2575	0.739375
3/31/2018 9:00:00 PM.000	634.1	0.06	1.18	2.63	0.42005	10.26	0.666379
3/31/2018 9:05:00 PM.000	625.8	0.06	1.18	2.76	0.45287	10.26	0.71848
3/31/2018 9:10:00 PM.000	620.3	0.06	1.18	2.53	0.49058	10.2575	0.778298
3/31/2018 9:15:00 PM.000	688.6	0.06	1.18	2.3	0.52345	10.26	0.830525
3/31/2018 9:20:00 PM.000	1079.4	0.06	1.18	2.04	0.54324	10.26	0.861941
3/31/2018 9:25:00 PM.000	1217.5	0.05	1.4	1.93	0.55983	10.26	0.888277
3/31/2018 9:30:00 PM.000	1222.9	0.05	1.75	1.73	0.56137	10.26	0.890722
3/31/2018 9:35:00 PM.000	1066.8	0.05	1.93	1.48	0.52174	10.26	0.82781
3/31/2018 9:40:00 PM.000	732.5	0.05	2.28	1.11	0.48445	10.26	0.768613
3/31/2018 9:45:00 PM.000	615	0.13	2.7	0.9	0.45614	10.2575	0.723628
3/31/2018 9:50:00 PM.000	591.9	0.46	3.04	0.69	0.41846	10.2575	2.57665
3/31/2018 9:55:00 PM.000	606.7	0.49	3.22	0.68	0.40996	10.2575	3.49102
3/31/2018 10:00:00 PM.000	606.3	1.08	3.24	0.69	0.40029	10.2575	3.9789
3/31/2018 10:05:00 PM.000	602.4	1.84	3.04	0.76	0.39446	10.2575	4.22698
3/31/2018 10:10:00 PM.000	596.1	1.2	2.71	1.11	0.38354	10.255	2.6684
3/31/2018 10:15:00 PM.000	604.6	0.74	2.48	1.38	0.3831	10.255	2.17906
3/31/2018 10:20:00 PM.000	596.7	0.78	2.17	1.58	0.40216	10.255	2.13544
3/31/2018 10:25:00 PM.000	603.3	0.86	1.88	1.57	0.40557	10.255	2.33209
3/31/2018 10:30:00 PM.000	618.4	1.04	1.76	1.81	0.41007	10.255	2.73495
3/31/2018 10:35:00 PM.000	655.8	0.95	1.58	2.02	0.41959	10.255	2.25064
3/31/2018 10:40:00 PM.000	1067.9	0.87	1.27	2.36	0.42411	10.255	2.10812
3/31/2018 10:45:00 PM.000	1205.6	0.58	1.08	2.35	0.4356	10.255	2.95069
3/31/2018 10:50:00 PM.000	1189.4	0.09	0.94	2.54	0.48617	10.2575	0.866724
3/31/2018 10:55:00 PM.000	1212.9	0.06	0.76	2.3	0.51723	10.2575	0.820602
3/31/2018 11:00:00 PM.000	1191.8	0.06	0.79	2.28	0.53794	10.26	0.853527
3/31/2018 11:05:00 PM.000	763	0.06	1.3	2.08	0.57075	10.2575	0.905559
3/31/2018 11:10:00 PM.000	221.7	0.05	1.8	1.98	0.59762	10.2575	0.948212
3/31/2018 11:15:00 PM.000	90.3	0.05	1.95	1.63	0.6157	10.255	0.976854
3/31/2018 11:20:00 PM.000	342.5	0.05	2.32	1.45	0.62267	10.255	0.987917
3/31/2018 11:25:00 PM.000	571	0.05	2.37	1.3	0.59335	10.2575	0.941434
3/31/2018 11:30:00 PM.000	616.7	0.48	2.25	1.22	0.57098	10.25	0.646748
3/31/2018 11:35:00 PM.000	628	1.42	2.49	0.97	0.55171	10.25	4.69855
3/31/2018 11:40:00 PM.000	646.3	1.03	2.77	1.01	0.52944	10.25	3.75602
3/31/2018 11:45:00 PM.000	681.3	0.83	2.52	1.1	0.51681	10.25	2.6332
3/31/2018 11:50:00 PM.000	1064.1	0.73	2.17	1.37	0.52873	10.2475	2.96914
3/31/2018 11:55:00 PM.000	1220.6	0.92	1.95	1.45	0.53188	10.2475	3.98933
4/1/2018 12:00:00 AM.000	1199.3	1.32	1.88	1.65	0.51412	10.25	5.03573
4/1/2018 12:05:00 AM.000	1218.6	1.66	1.59	1.85	0.51451	10.2525	4.7862
4/1/2018 12:10:00 AM.000	1213.9	1.2	1.29	2.11	0.51353	10.2525	3.70222
4/1/2018 12:15:00 AM.000	1111.5	0.41	1.07	2.52	0.52489	10.2525	2.30397
4/1/2018 12:20:00 AM.000	436.5	0.07	0.83	2.67	0.57072	10.255	0.168106
4/1/2018 12:25:00 AM.000	149	0.06	0.69	2.6	0.6091	10.255	0.966378
4/1/2018 12:30:00 AM.000	66.2	0.06	0.79	2.34	0.63259	10.2525	1.0036
4/1/2018 12:35:00 AM.000	347	0.06	1.21	2.02	0.6674	10.2525	1.05885
4/1/2018 12:40:00 AM.000	1036.7	0.06	1.1	1.84	0.68918	10.255	1.09349
4/1/2018 12:45:00 AM.000	1239.9	0.06	1.03	1.6	0.6924	10.255	1.0986
4/1/2018 12:50:00 AM.000	1239.3	0.06	1.39	1.42	0.69186	10.255	1.09774
4/1/2018 12:55:00 AM.000	1197.8	0.06	1.63	1.22	0.64942	10.255	1.03038
4/1/2018 1:00:00 AM.000	710.9	0.06	1.89	0.87	0.61585	10.255	0.977092
4/1/2018 1:05:00 AM.000	629.7	0.54	2.31	0.71	0.58581	10.255	1.00117
4/1/2018 1:10:00 AM.000	646.7	1.36	2.67	0.48	0.53305	10.255	4.96571
4/1/2018 1:15:00 AM.000	647.2	1.67	2.76	0.59	0.49807	10.255	4.4164
4/1/2018 1:20:00 AM.000	646.7	1.04	2.7	0.73	0.50159	10.255	3.88156
4/1/2018 1:25:00 AM.000	656.1	0.54	2.67	1.15	0.50702	10.2575	2.22171
4/1/2018 1:30:00 AM.000	656.3	0.61	2.34	1.41	0.50259	10.255	2.28649
4/1/2018 1:35:00 AM.000	646.9	0.76	1.92	1.53	0.50952	10.255	3.01725
4/1/2018 1:40:00 AM.000	645.4	0.86	2	1.54	0.52134	10.2575	3.70533
4/1/2018 1:45:00 AM.000	653.1	1.15	1.84	1.67	0.51394	10.2575	4.79046
4/1/2018 1:50:00 AM.000	651.7	1.5	1.42	1.81	0.50348	10.2525	4.77152
4/1/2018 1:55:00 AM.000	659	1.62	1.28	2	0.50319	10.255	4.14557
4/1/2018 2:00:00 AM.000	663.3	0.43	1.11	2.24	0.52795	10.255	2.0165
4/1/2018 2:05:00 AM.000	659	0.07	0.71	2.5	0.55974	10.255	0.888029
4/1/2018 2:10:00 AM.000	672.8	0.06	0.56	2.47	0.59527	10.255	0.944426
4/1/2018 2:15:00 AM.000	668.5	0.06	0.69	2.38	0.63123	10.255	1.0015
4/1/2018 2:20:00 AM.000	669.6	0.06	0.67	2.3	0.649	10.2575	1.02977
4/1/2018 2:25:00 AM.000	643.8	0.06	0.67	2.38	0.67164	10.255	1.06565
4/1/2018 2:30:00 AM.000	635.4	0.06	1.14	2.3	0.69969	10.255	1.11017
4/1/2018 2:35:00 AM.000	643.5	0.05	1.33	2.02	0.70371	10.2575	1.11662
4/1/2018 2:40:00 AM.000	647.8	0.05	1.28	1.61	0.70838	10.2525	1.1239
4/1/2018 2:45:00 AM.000	643.5	0.05	1.65	1.33	0.69698	10.255	1.10587
4/1/2018 2:50:00 AM.000	635.9	0.06	1.91	1.14	0.63665	10.255	1.01011
4/1/2018 2:55:00 AM.000	642.3	0.64	1.83	1.03	0.60821	10.255	0.875245
4/1/2018 3:00:00 AM.000	642.1	0.98	2.15	0.84	0.60332	10.255	4.73083
4/1/2018 3:05:00 AM.000	632.6	0.85	2.4	0.74	0.56045	10.255	4.13811
4/1/2018 3:10:00 AM.000	636.5	0.8	2.15	0.9	0.55224	10.255	4.02082
4/1/2018 3:15:00 AM.000	645.2	1.06	2.12	1.07	0.56748	10.2525	5.81444
4/1/2018 3:20:00 AM.000	642.2	1.72	2.12	1.36	0.54024	10.255	6.3663
4/1/2018 3:25:00 AM.000	657.7	1.8	1.6	1.6	0.51092	10.255	5.04648
4/1/2018 3:30:00 AM.000	662	0.84	1.3	2.02	0.5235	10.2575	2.74736
4/1/2018 3:35:00 AM.000	657.7	0.26	1.21	2.13	0.55389	10.2575	1.95597
4/1/2018 3:40:00 AM.000	636.6	0.07	0.82	2.15	0.5862	10.2575	0.134481
4/1/2018 3:45:00 AM.000	622.8	0.06	0.64	1.93	0.62659	10.255	0.99414
4/1/2018 3:50:00 AM.000	619.9	0.06	0.85	1.96	0.65745	10.255	1.04312
4/1/2018 3:55:00 AM.000	627.5	0.06	0.83	1.82	0.67478	10.2575	1.07069
4/1/2018 4:00:00 AM.000	633.2	0.06	0.73	1.61	0.69039	10.2575	1.09547
4/1/2018 4:05:00 AM.000	615	0.05	0.98	1.45	0.71282	10.2575	1.13108
4/1/2018 4:10:00 AM.000	621.4	0.05	1.33	1.46	0.71709	10.26	1.13792
4/1/2018 4:15:00 AM.000	655.3	0.05	1.33	1.34	0.69587	10.2575	1.10417
4/1/2018 4:20:00 AM.000	634.5	0.05	1.53	1.19	0.67836	10.2575	1.07638
4/1/2018 4:25:00 AM.000	643.4	0.05	1.83	1.04	0.62346	10.2575	0.98923
4/1/2018 4:30:00 AM.000	650.8	0.09	1.88	0.9	0.53734	10.2575	0.852524
4/1/2018 4:35:00 AM.000	650.2	0.41	2.05	0.68	0.52375	10.255	2.44434
4/1/2018 4:40:00 AM.000	639	0.84	2.33	0.41	0.47682	10.255	4.58262
4/1/2018 4:45:00 AM.000	626.7	1.12	2.41	0.46	0.36891	10.255	3.5286
4/1/2018 4:50:00 AM.000	606.9	1.38	2.23	0.68	0.43069	10.255	4.18972
4/1/2018 4:55:00 AM.000	613	1.27	1.84	0.96	0.44185	10.2575	3.80531
[truncated: 95,101 more rows]

## Sheet: Reactor 3 Compartment 2
Time	Influent flowrate (m3/h)	DO (g O2/m3)	NH4 (g N/m3)	NO3 (g N/m3)	N2O (g N/m3)	Temperature (°C)	N2O emission rate (g N/m3/d)
[truncated: 96,889 more rows]
